# Supplementary material for: Microwave Vitrification of Uranium Tailings: Microstructure and Mechanical Property
Source: Hindawi journal article supplement (doi:10.1155/2021/5544835), 2021-04-19
Supplement: f1 [file 5544835.f1.zip]

Archive with 8 entries (8 files):
- 5544835.f1/Density and porosity.txt
- 5544835.f1/FTIR.txt
- 5544835.f1/graphical abstract.doc
- 5544835.f1/Power and Temperature.txt
- 5544835.f1/SEM and EDS.doc
- 5544835.f1/Vickers hardnessd.txt
- 5544835.f1/XRD.txt
- 5544835.f1/XRF.txt
