# Supplementary material for: Microwave Vitrification of Uranium Tailings: Microstructure and Mechanical Property
Source: Hindawi journal article supplement (doi:10.1155/2021/5544835), 2021-04-19
Supplement: f1 [file 5544835.f1.zip › 5544835.f1/Density and porosity.txt]

tempe	Density	 ear	         tempe	porosity   ear
1000	1.929	 0.01084 	 1000	0.35149	   0.01548
1100	2.18527	 0.01145         1100	0.167	   0.01842
1200	2.40343	 0.01143	 1200	0	   0.01448
1300	2.45173	 0.01406         1300	0	   0.01716
					
Na2CO3	Density	 ear	         Na2CO3	porosity   ear
5	1.39723	 0.01954	 5	1.18795	   0.01912
10	1.98108	 0.02265	 10	0.53763	   0.02687
15	2.2492	 0.02045	 15	0.24036	   0.02435
20	2.40343	 0.01143	 20	0	   0.0145
