# Supplementary material for: Microwave Vitrification of Uranium Tailings: Microstructure and Mechanical Property
Source: Hindawi journal article supplement (doi:10.1155/2021/5544835), 2021-04-19
Supplement: f1 [file 5544835.f1.zip › 5544835.f1/FTIR.txt]

0				5				10				15				20				1000				1100				1200				1300
399.264912	99.35268	399.264912	54.662957	399.264912	66.83616	399.264912	74.498709	399.264912	159.236621	399.264912	87.914506	399.264912	74.786213	399.264912	159.236621	399.264912	168.877602
401.193728	98.33132	401.193728	60.075299	401.193728	69.722708	401.193728	75.396429	401.193728	158.214398	401.193728	86.532926	401.193728	73.792923	401.193728	158.214398	401.193728	169.164962
403.122544	96.78507	403.122544	66.027783	403.122544	72.971643	403.122544	75.25871	403.122544	157.204993	403.122544	85.126582	403.122544	72.158038	403.122544	157.204993	403.122544	169.356271
405.05136	94.837071	405.05136	71.753566	405.05136	75.790493	405.05136	75.208821	405.05136	156.398594	405.05136	83.666944	405.05136	70.420521	405.05136	156.398594	405.05136	169.337355
406.980176	92.606232	406.980176	76.337845	406.980176	79.258263	406.980176	75.313226	406.980176	155.632746	406.980176	82.255188	406.980176	69.38436	406.980176	155.632746	406.980176	169.232216
408.908992	90.510223	408.908992	79.474327	408.908992	81.944735	408.908992	75.665833	408.908992	154.770165	408.908992	80.84626	408.908992	68.565051	408.908992	154.770165	408.908992	169.019115
410.837808	88.762605	410.837808	81.16956	410.837808	82.409338	410.837808	75.924891	410.837808	154.121156	410.837808	79.515288	410.837808	67.171623	410.837808	154.121156	410.837808	168.708108
412.766624	87.445808	412.766624	81.211045	412.766624	82.163786	412.766624	75.800494	412.766624	153.675246	412.766624	78.46717	412.766624	65.976386	412.766624	153.675246	412.766624	168.169459
414.69544	86.612565	414.69544	79.118236	414.69544	80.749917	414.69544	75.814923	414.69544	153.201587	414.69544	77.707182	414.69544	65.530146	414.69544	153.201587	414.69544	167.387246
416.624256	86.10401	416.624256	77.648306	416.624256	80.34152	416.624256	75.688397	416.624256	152.671945	416.624256	77.129657	416.624256	65.224162	416.624256	152.671945	416.624256	166.625317
418.553072	85.725063	418.553072	76.425355	418.553072	80.008079	418.553072	75.38449	418.553072	152.277174	418.553072	76.641329	418.553072	64.619446	418.553072	152.277174	418.553072	166.061852
420.481888	85.485935	420.481888	75.478485	420.481888	79.883732	420.481888	74.965697	420.481888	152.087525	420.481888	76.199613	420.481888	64.33229	420.481888	152.087525	420.481888	165.659968
422.410704	85.136858	422.410704	74.781525	422.410704	79.789279	422.410704	74.063768	422.410704	151.977673	422.410704	75.711677	422.410704	64.781298	422.410704	151.977673	422.410704	165.324424
424.33952	84.60365	424.33952	74.044243	424.33952	80.161104	424.33952	73.523266	424.33952	152.005906	424.33952	75.259838	424.33952	65.114045	424.33952	152.005906	424.33952	164.995083
426.268336	83.924127	426.268336	73.780908	426.268336	82.142216	426.268336	73.637342	426.268336	152.189122	426.268336	74.843188	426.268336	65.255178	426.268336	152.189122	426.268336	164.746137
428.197152	83.124781	428.197152	73.374598	428.197152	82.918162	428.197152	73.801227	428.197152	152.543975	428.197152	74.560366	428.197152	65.989033	428.197152	152.543975	428.197152	164.469281
430.125968	82.619535	430.125968	73.243901	430.125968	82.274976	430.125968	73.786583	430.125968	153.095224	430.125968	74.568646	430.125968	65.829288	430.125968	153.095224	430.125968	164.315444
432.054784	82.506562	432.054784	72.691886	432.054784	81.926068	432.054784	73.973578	432.054784	153.066497	432.054784	74.734138	432.054784	65.091498	432.054784	153.066497	432.054784	163.858255
433.9836	82.994808	433.9836	71.671221	433.9836	81.434721	433.9836	74.454937	433.9836	153.151707	433.9836	75.005998	433.9836	65.160074	433.9836	153.151707	433.9836	163.68516
435.912416	83.574331	435.912416	70.686314	435.912416	80.92056	435.912416	75.052437	435.912416	153.628269	435.912416	75.38154	435.912416	65.733174	435.912416	153.628269	435.912416	163.673862
437.841232	83.775315	437.841232	70.209446	437.841232	79.47278	437.841232	75.691335	437.841232	154.218316	437.841232	75.655162	437.841232	65.719195	437.841232	154.218316	437.841232	163.405935
439.770048	83.364733	439.770048	69.95258	439.770048	78.027581	439.770048	74.638132	439.770048	154.932353	439.770048	75.699599	439.770048	65.48168	439.770048	154.932353	439.770048	163.115688
441.698864	82.259211	441.698864	70.095909	441.698864	77.176072	441.698864	73.767854	441.698864	155.698998	441.698864	75.878096	441.698864	65.984323	441.698864	155.698998	441.698864	162.757818
443.62768	80.821989	443.62768	70.793628	443.62768	76.817051	443.62768	73.499557	443.62768	156.463422	443.62768	76.035975	443.62768	66.390611	443.62768	156.463422	443.62768	162.427282
445.556496	79.473887	445.556496	71.72336	445.556496	76.656152	445.556496	73.20061	445.556496	156.996504	445.556496	76.348501	445.556496	64.70841	445.556496	156.996504	445.556496	162.230108
447.485312	78.487593	447.485312	72.31829	447.485312	75.969622	447.485312	73.124666	447.485312	157.144868	447.485312	76.95994	447.485312	63.972812	447.485312	157.144868	447.485312	162.129126
449.414128	78.327977	449.414128	72.834334	449.414128	75.828761	449.414128	72.992083	449.414128	156.905254	449.414128	77.5108	449.414128	64.120348	449.414128	156.905254	449.414128	162.020971
451.342944	79.264194	451.342944	72.967906	451.342944	76.124237	451.342944	72.99812	451.342944	156.763445	451.342944	77.956443	451.342944	64.163392	451.342944	156.763445	451.342944	161.918464
453.27176	80.204423	453.27176	72.981617	453.27176	76.189733	453.27176	73.032592	453.27176	156.955494	453.27176	78.248813	453.27176	63.730064	453.27176	156.955494	453.27176	161.802308
455.200576	81.031092	455.200576	72.996486	455.200576	76.089227	455.200576	72.467673	455.200576	157.167944	455.200576	78.035821	455.200576	63.484807	455.200576	157.167944	455.200576	161.695899
457.129392	81.529192	457.129392	72.544621	457.129392	75.955173	457.129392	72.040252	457.129392	157.235713	457.129392	77.098756	457.129392	63.717049	457.129392	157.235713	457.129392	161.591746
459.058208	81.684144	459.058208	72.097587	459.058208	76.706083	459.058208	71.751503	459.058208	157.348551	459.058208	76.419401	459.058208	63.842045	459.058208	157.348551	459.058208	161.289034
460.987024	81.512545	460.987024	71.328703	460.987024	77.807502	460.987024	71.744397	460.987024	157.648718	460.987024	75.864602	460.987024	63.650705	460.987024	157.648718	460.987024	161.31205
462.91584	80.897385	462.91584	70.70878	462.91584	78.598392	462.91584	71.880715	462.91584	158.104789	462.91584	75.491718	462.91584	63.839094	462.91584	158.104789	462.91584	161.330939
464.844656	80.122828	464.844656	70.266958	464.844656	79.146693	464.844656	71.683079	464.844656	158.367667	464.844656	75.46544	464.844656	64.324293	464.844656	158.367667	464.844656	161.177473
466.773472	79.494233	466.773472	69.909466	466.773472	79.557574	466.773472	71.740814	466.773472	158.483278	466.773472	75.517421	466.773472	64.637609	466.773472	158.483278	466.773472	161.232837
468.702288	79.160264	468.702288	69.928572	468.702288	80.439448	468.702288	72.127307	468.702288	158.750667	468.702288	75.645424	468.702288	64.625034	468.702288	158.750667	468.702288	161.278568
470.631104	79.34344	470.631104	70.066395	470.631104	80.922142	470.631104	72.545093	470.631104	159.005763	470.631104	75.810648	470.631104	64.800793	470.631104	159.005763	470.631104	161.392653
472.55992	79.915009	472.55992	70.294813	472.55992	81.063356	472.55992	72.962411	472.55992	159.151745	472.55992	75.849802	472.55992	65.193129	472.55992	159.151745	472.55992	161.539678
474.488736	80.70227	474.488736	70.456269	474.488736	81.397595	474.488736	73.275408	474.488736	159.220213	474.488736	75.895466	474.488736	65.270225	474.488736	159.220213	474.488736	161.744577
476.417552	81.626293	476.417552	71.188137	476.417552	81.561774	476.417552	73.667182	476.417552	159.439815	476.417552	76.084702	476.417552	65.411939	476.417552	159.439815	476.417552	161.999351
478.346368	82.536159	478.346368	72.204308	478.346368	82.072341	478.346368	74.154167	478.346368	159.723626	478.346368	76.483894	478.346368	65.861105	478.346368	159.723626	478.346368	162.358531
480.275184	83.295846	480.275184	73.547535	480.275184	82.485432	480.275184	74.731963	480.275184	159.876384	480.275184	77.167995	480.275184	66.36671	480.275184	159.876384	480.275184	162.674818
482.204	83.916101	482.204	74.995589	482.204	82.786177	482.204	75.196629	482.204	160.018329	482.204	77.935621	482.204	66.542796	482.204	160.018329	482.204	162.915726
484.132816	84.249161	484.132816	76.467382	484.132816	83.049244	484.132816	75.851317	484.132816	160.166027	484.132816	78.812816	484.132816	66.592887	484.132816	160.166027	484.132816	163.108576
486.061632	84.431523	486.061632	77.936224	486.061632	83.05162	486.061632	76.780869	486.061632	160.387882	486.061632	79.750073	486.061632	67.044126	486.061632	160.387882	486.061632	163.347058
487.990448	84.581423	487.990448	79.218638	487.990448	83.465447	487.990448	77.605051	487.990448	160.646783	487.990448	80.582248	487.990448	67.428641	487.990448	160.646783	487.990448	163.621859
489.919264	84.753906	489.919264	80.219457	489.919264	83.754475	489.919264	78.197397	489.919264	160.828594	489.919264	81.273455	489.919264	67.536718	489.919264	160.828594	489.919264	163.909361
491.84808	85.162963	491.84808	80.796712	491.84808	84.11397	491.84808	78.404326	491.84808	161.014711	491.84808	81.831883	491.84808	67.917895	491.84808	161.014711	491.84808	164.231562
493.776896	85.626366	493.776896	81.063979	493.776896	84.640683	493.776896	78.575538	493.776896	161.301379	493.776896	82.369407	493.776896	68.488928	493.776896	161.301379	493.776896	164.597371
495.705712	86.096352	495.705712	81.087376	495.705712	84.667528	495.705712	79.059267	495.705712	161.706605	495.705712	82.979126	495.705712	68.867601	495.705712	161.706605	495.705712	164.991814
497.634528	86.552025	497.634528	80.899891	497.634528	84.950857	497.634528	79.523626	497.634528	161.928342	497.634528	83.738837	497.634528	68.898584	497.634528	161.928342	497.634528	165.356678
499.563344	86.871553	499.563344	80.558884	499.563344	85.346196	499.563344	80.033109	499.563344	161.950112	499.563344	84.533778	499.563344	69.159321	499.563344	161.950112	499.563344	165.67719
501.49216	87.129615	501.49216	80.47677	501.49216	85.726258	501.49216	80.416492	501.49216	162.074521	501.49216	85.350599	501.49216	69.749995	501.49216	162.074521	501.49216	166.043098
503.420976	87.317238	503.420976	80.581934	503.420976	86.255401	503.420976	80.845024	503.420976	162.280646	503.420976	86.073958	503.420976	70.03848	503.420976	162.280646	503.420976	166.452563
505.349792	87.349164	505.349792	80.778694	505.349792	86.792515	505.349792	81.372724	505.349792	162.567005	505.349792	86.565823	505.349792	70.125493	505.349792	162.567005	505.349792	166.848081
507.278608	87.428989	507.278608	80.802859	507.278608	87.760163	507.278608	81.671005	507.278608	162.859764	507.278608	86.962386	507.278608	70.531456	507.278608	162.859764	507.278608	167.145463
509.207424	87.570502	509.207424	80.970608	509.207424	88.564026	509.207424	82.037209	509.207424	163.121357	509.207424	87.287798	509.207424	71.126312	509.207424	163.121357	509.207424	167.39688
511.13624	87.820653	511.13624	81.469161	511.13624	89.131936	511.13624	82.456025	511.13624	163.385115	511.13624	87.526741	511.13624	71.494181	511.13624	163.385115	511.13624	167.663834
513.065056	88.250581	513.065056	82.15501	513.065056	89.642652	513.065056	82.796828	513.065056	163.612563	513.065056	87.954912	513.065056	71.647291	513.065056	163.612563	513.065056	167.916235
514.993872	88.786569	514.993872	82.888925	514.993872	90.040227	514.993872	83.214487	514.993872	163.905927	514.993872	88.494873	514.993872	72.013639	514.993872	163.905927	514.993872	168.1836
516.922688	89.38581	516.922688	83.283928	516.922688	90.686141	516.922688	83.652372	516.922688	164.278293	516.922688	89.082908	516.922688	72.46546	516.922688	164.278293	516.922688	168.480072
518.851504	90.016087	518.851504	83.829551	518.851504	91.069565	518.851504	84.142987	518.851504	164.666758	518.851504	89.709311	518.851504	72.605941	518.851504	164.666758	518.851504	168.817201
520.78032	90.531491	520.78032	84.447564	520.78032	91.301936	520.78032	84.658911	520.78032	164.97073	520.78032	90.209553	520.78032	72.770017	520.78032	164.97073	520.78032	169.117567
522.709136	90.876874	522.709136	85.166874	522.709136	91.700113	522.709136	85.035123	522.709136	165.130373	522.709136	90.547276	522.709136	73.215106	522.709136	165.130373	522.709136	169.31336
524.637952	91.030726	524.637952	85.92109	524.637952	92.11963	524.637952	85.351687	524.637952	165.309803	524.637952	90.897087	524.637952	73.698879	524.637952	165.309803	524.637952	169.451122
526.566768	90.986988	526.566768	86.733611	526.566768	92.572569	526.566768	85.697182	526.566768	165.610334	526.566768	91.279686	526.566768	73.890855	526.566768	165.610334	526.566768	169.578798
528.495584	90.870775	528.495584	87.617889	528.495584	92.637401	528.495584	86.128241	528.495584	166.019068	528.495584	91.756487	528.495584	73.97717	528.495584	166.019068	528.495584	169.763487
530.4244	90.708598	530.4244	88.311312	530.4244	92.602824	530.4244	86.462009	530.4244	166.377392	530.4244	92.369945	530.4244	74.35736	530.4244	166.377392	530.4244	169.927609
532.353216	90.585829	532.353216	88.748572	532.353216	92.811066	532.353216	86.670656	532.353216	166.592247	532.353216	93.025701	532.353216	74.668362	532.353216	166.592247	532.353216	170.057359
534.282032	90.621095	534.282032	88.807048	534.282032	93.031144	534.282032	86.863575	534.282032	166.897273	534.282032	93.655303	534.282032	74.713033	534.282032	166.897273	534.282032	170.164448
536.210848	90.848026	536.210848	88.745506	536.210848	93.274563	536.210848	87.063481	536.210848	167.255022	536.210848	94.217351	536.210848	74.821974	536.210848	167.255022	536.210848	170.265149
538.139664	91.298601	538.139664	88.645511	538.139664	93.244736	538.139664	87.229187	538.139664	167.612192	538.139664	94.648059	538.139664	75.13236	538.139664	167.612192	538.139664	170.360012
540.06848	91.914838	540.06848	88.443867	540.06848	93.233662	540.06848	87.355578	540.06848	167.987803	540.06848	94.93117	540.06848	75.42096	540.06848	167.987803	540.06848	170.46105
541.997296	92.519127	541.997296	88.131812	541.997296	93.181754	541.997296	87.471603	541.997296	168.406528	541.997296	95.142537	541.997296	75.509174	541.997296	168.406528	541.997296	170.62011
543.926112	93.051648	543.926112	87.934423	543.926112	92.889468	543.926112	87.600728	543.926112	168.874031	543.926112	95.365543	543.926112	75.617936	543.926112	168.874031	543.926112	170.816084
545.854928	93.482567	545.854928	87.908487	545.854928	92.623157	545.854928	87.731673	545.854928	169.267945	545.854928	95.638763	545.854928	75.820882	545.854928	169.267945	545.854928	170.976624
547.783744	93.702514	547.783744	88.075524	547.783744	92.398019	547.783744	87.789227	547.783744	169.561366	547.783744	95.997665	547.783744	75.882268	547.783744	169.561366	547.783744	171.085858
549.71256	93.735374	549.71256	88.317308	549.71256	92.578289	549.71256	87.756405	549.71256	169.820274	549.71256	96.348959	549.71256	75.907077	549.71256	169.820274	549.71256	171.157252
551.641376	93.643907	551.641376	88.753928	551.641376	92.935354	551.641376	87.807386	551.641376	170.117957	551.641376	96.647839	551.641376	75.99689	551.641376	170.117957	551.641376	171.246363
553.570192	93.550084	553.570192	89.308181	553.570192	93.245481	553.570192	87.90001	553.570192	170.451157	553.570192	96.814492	553.570192	76.143442	553.570192	170.451157	553.570192	171.356256
555.499008	93.545214	555.499008	89.927455	555.499008	93.839795	555.499008	88.072953	555.499008	170.692796	555.499008	96.796494	555.499008	76.237248	555.499008	170.692796	555.499008	171.483883
557.427824	93.621912	557.427824	90.581317	557.427824	94.449402	557.427824	88.202481	557.427824	170.909472	557.427824	96.677962	557.427824	76.236794	557.427824	170.909472	557.427824	171.595373
559.35664	93.766872	559.35664	91.098408	559.35664	95.053227	559.35664	88.209846	559.35664	171.195566	559.35664	96.573874	559.35664	76.372701	559.35664	171.195566	559.35664	171.711256
561.285456	93.978032	561.285456	91.542409	561.285456	95.430506	561.285456	88.280768	561.285456	171.511248	561.285456	96.596674	561.285456	76.524674	561.285456	171.511248	561.285456	171.805892
563.214272	94.135132	563.214272	91.777696	563.214272	95.60403	563.214272	88.35948	563.214272	171.765705	563.214272	96.712289	563.214272	76.480772	563.214272	171.765705	563.214272	171.862449
565.143088	94.231174	565.143088	91.939471	565.143088	95.916132	565.143088	88.409475	565.143088	171.915221	565.143088	96.842391	565.143088	76.458037	565.143088	171.915221	565.143088	171.880465
567.071904	94.262707	567.071904	91.942869	567.071904	96.095249	567.071904	88.324994	567.071904	172.093295	567.071904	97.028557	567.071904	76.590857	567.071904	172.093295	567.071904	171.903308
569.00072	94.245571	569.00072	91.749821	569.00072	96.169571	569.00072	88.180326	569.00072	172.307374	569.00072	97.211984	569.00072	76.742053	569.00072	172.307374	569.00072	171.941577
570.929536	94.25292	570.929536	91.442835	570.929536	96.054235	570.929536	88.261539	570.929536	172.48276	570.929536	97.296004	570.929536	76.718917	570.929536	172.48276	570.929536	171.979882
572.858352	94.317823	572.858352	91.027238	572.858352	95.850078	572.858352	88.363997	572.858352	172.599982	572.858352	97.316997	572.858352	76.670997	572.858352	172.599982	572.858352	171.992422
574.787168	94.490661	574.787168	90.651538	574.787168	95.959056	574.787168	88.404109	574.787168	172.661015	574.787168	97.329022	574.787168	76.798524	574.787168	172.661015	574.787168	172.024278
576.715984	94.793893	576.715984	90.345839	576.715984	95.914801	576.715984	88.416819	576.715984	172.702798	576.715984	97.383807	576.715984	76.860256	576.715984	172.702798	576.715984	172.071044
578.6448	95.167907	578.6448	90.270411	578.6448	95.760974	578.6448	88.479286	578.6448	172.719876	578.6448	97.562617	578.6448	76.797351	578.6448	172.719876	578.6448	172.117888
580.573616	95.580742	580.573616	90.237111	580.573616	95.703586	580.573616	88.683285	580.573616	172.753615	580.573616	97.808467	580.573616	76.804981	580.573616	172.753615	580.573616	172.149684
582.502432	95.937871	582.502432	90.364056	582.502432	95.811163	582.502432	88.876084	582.502432	172.831013	582.502432	98.059194	582.502432	76.921795	582.502432	172.831013	582.502432	172.187248
584.431248	96.133122	584.431248	90.653244	584.431248	96.060898	584.431248	88.948718	584.431248	172.888985	584.431248	98.298767	584.431248	76.981518	584.431248	172.888985	584.431248	172.28995
586.360064	96.156226	586.360064	91.076277	586.360064	96.147964	586.360064	89.012937	586.360064	172.949846	586.360064	98.479179	586.360064	76.933087	586.360064	172.949846	586.360064	172.418094
588.28888	96.008368	588.28888	91.558759	588.28888	96.231733	588.28888	89.133045	588.28888	172.975645	588.28888	98.561939	588.28888	77.018639	588.28888	172.975645	588.28888	172.509417
590.217696	95.763631	590.217696	92.016785	590.217696	96.348393	590.217696	89.28375	590.217696	172.978234	590.217696	98.603533	590.217696	77.201863	590.217696	172.978234	590.217696	172.539203
592.146512	95.540883	592.146512	92.420827	592.146512	96.346427	592.146512	89.391015	592.146512	173.03188	592.146512	98.63037	592.146512	77.309858	592.146512	173.03188	592.146512	172.532351
594.075328	95.4035	594.075328	92.777718	594.075328	96.38383	594.075328	89.538956	594.075328	173.112651	594.075328	98.688336	594.075328	77.333969	594.075328	173.112651	594.075328	172.563132
596.004144	95.40232	596.004144	92.985081	596.004144	96.197134	596.004144	89.663895	596.004144	173.154324	596.004144	98.812646	596.004144	77.408155	596.004144	173.154324	596.004144	172.636452
597.93296	95.545915	597.93296	93.12171	597.93296	96.090023	597.93296	89.822034	597.93296	173.099486	597.93296	98.971284	597.93296	77.54357	597.93296	173.099486	597.93296	172.726668
599.861776	95.777094	599.861776	93.172686	599.861776	96.20434	599.861776	89.936708	599.861776	173.039708	599.861776	99.1283	599.861776	77.612989	599.861776	173.039708	599.861776	172.791422
601.790592	96.0455	601.790592	93.191386	601.790592	96.344773	601.790592	89.975554	601.790592	173.032937	601.790592	99.251952	601.790592	77.63391	601.790592	173.032937	601.790592	172.848034
603.719408	96.281563	603.719408	93.22964	603.719408	96.479028	603.719408	90.055161	603.719408	173.014953	603.719408	99.289289	603.719408	77.7437	603.719408	173.014953	603.719408	172.888792
605.648224	96.43157	605.648224	93.1601	605.648224	96.642745	605.648224	90.199032	605.648224	172.970829	605.648224	99.250541	605.648224	77.839485	605.648224	172.970829	605.648224	172.89664
607.57704	96.508049	607.57704	93.065424	607.57704	96.990832	607.57704	90.425279	607.57704	172.90514	607.57704	99.189861	607.57704	77.835487	607.57704	172.90514	607.57704	172.917727
609.505856	96.504325	609.505856	93.005185	609.505856	97.335393	609.505856	90.6433	609.505856	172.854441	609.505856	99.154633	609.505856	77.839463	609.505856	172.854441	609.505856	172.964489
611.434672	96.459972	611.434672	93.003073	611.434672	97.537	611.434672	90.790549	611.434672	172.768235	611.434672	99.185287	611.434672	77.879493	611.434672	172.768235	611.434672	173.027279
613.363488	96.424157	613.363488	92.958117	613.363488	97.695724	613.363488	90.978598	613.363488	172.678446	613.363488	99.251837	613.363488	77.926397	613.363488	172.678446	613.363488	173.063274
615.292304	96.418148	615.292304	92.854971	615.292304	97.782514	615.292304	91.084078	615.292304	172.640676	615.292304	99.341758	615.292304	77.919345	615.292304	172.640676	615.292304	173.056378
617.22112	96.445756	617.22112	92.840399	617.22112	97.930211	617.22112	91.149765	617.22112	172.618739	617.22112	99.466354	617.22112	77.908454	617.22112	172.618739	617.22112	172.997731
619.149936	96.508527	619.149936	92.816969	619.149936	98.035899	619.149936	91.151196	619.149936	172.594603	619.149936	99.537673	619.149936	77.910992	619.149936	172.594603	619.149936	172.914403
621.078752	96.586724	621.078752	92.868551	621.078752	98.078153	621.078752	91.122548	621.078752	172.513131	621.078752	99.56549	621.078752	77.874997	621.078752	172.513131	621.078752	172.8832
623.007568	96.661653	623.007568	92.884956	623.007568	98.153876	623.007568	91.174412	623.007568	172.404416	623.007568	99.576052	623.007568	77.825269	623.007568	172.404416	623.007568	172.889996
624.936384	96.705052	624.936384	92.937836	624.936384	98.179693	624.936384	91.209336	624.936384	172.351975	624.936384	99.57861	624.936384	77.826681	624.936384	172.351975	624.936384	172.895596
626.8652	96.714087	626.8652	93.021146	626.8652	98.191623	626.8652	91.20164	626.8652	172.31174	626.8652	99.601378	626.8652	77.805653	626.8652	172.31174	626.8652	172.879969
628.794016	96.71568	628.794016	93.145416	628.794016	98.03876	628.794016	91.223633	628.794016	172.244634	628.794016	99.628002	628.794016	77.73179	628.794016	172.244634	628.794016	172.842044
630.722832	96.696611	630.722832	93.30298	630.722832	97.901172	630.722832	91.29581	630.722832	172.153593	630.722832	99.656058	630.722832	77.647234	630.722832	172.153593	630.722832	172.783867
632.651648	96.677038	632.651648	93.454098	632.651648	97.863232	632.651648	91.422812	632.651648	172.092902	632.651648	99.795051	632.651648	77.643072	632.651648	172.092902	632.651648	172.713044
634.580464	96.720639	634.580464	93.646975	634.580464	97.821885	634.580464	91.48582	634.580464	172.096924	634.580464	99.880653	634.580464	77.646547	634.580464	172.096924	634.580464	172.657033
636.50928	96.794925	636.50928	93.8152	636.50928	97.824064	636.50928	91.544682	636.50928	172.10702	636.50928	99.88448	636.50928	77.596191	636.50928	172.10702	636.50928	172.614888
638.438096	96.876611	638.438096	93.951521	638.438096	97.817175	638.438096	91.611827	638.438096	172.118515	638.438096	99.818883	638.438096	77.529805	638.438096	172.118515	638.438096	172.571059
640.366912	96.945762	640.366912	94.029333	640.366912	97.881072	640.366912	91.709712	640.366912	172.144486	640.366912	99.725568	640.366912	77.499974	640.366912	172.144486	640.366912	172.530153
642.295728	96.97805	642.295728	94.061479	642.295728	98.03646	642.295728	91.769748	642.295728	172.156454	642.295728	99.621482	642.295728	77.433376	642.295728	172.156454	642.295728	172.464077
644.224544	97.018195	644.224544	94.032344	644.224544	98.113919	644.224544	91.769446	644.224544	172.160455	644.224544	99.553607	644.224544	77.319816	644.224544	172.160455	644.224544	172.339302
646.15336	97.062807	646.15336	93.91008	646.15336	98.205648	646.15336	91.734638	646.15336	172.131916	646.15336	99.526558	646.15336	77.305929	646.15336	172.131916	646.15336	172.207143
648.082176	97.076188	648.082176	93.699609	648.082176	98.183239	648.082176	91.728714	648.082176	172.108393	648.082176	99.507683	648.082176	77.34764	648.082176	172.108393	648.082176	172.119927
650.010992	97.07142	650.010992	93.444345	650.010992	98.204724	650.010992	91.770572	650.010992	172.10343	650.010992	99.492804	650.010992	77.358886	650.010992	172.10343	650.010992	172.069104
651.939808	97.035486	651.939808	93.152378	651.939808	98.256344	651.939808	91.722842	651.939808	172.097114	651.939808	99.456151	651.939808	77.319651	651.939808	172.097114	651.939808	172.017933
653.868624	96.968809	653.868624	92.935832	653.868624	98.199893	653.868624	91.576897	653.868624	172.06867	653.868624	99.357388	653.868624	77.262578	653.868624	172.06867	653.868624	171.923101
655.79744	96.889093	655.79744	92.772446	655.79744	98.218375	655.79744	91.465823	655.79744	172.044974	655.79744	99.220573	655.79744	77.238688	655.79744	172.044974	655.79744	171.793427
657.726256	96.792787	657.726256	92.661533	657.726256	98.282066	657.726256	91.347906	657.726256	172.061564	657.726256	99.058417	657.726256	77.190688	657.726256	172.061564	657.726256	171.624748
659.655072	96.696355	659.655072	92.620233	659.655072	98.424323	659.655072	91.317225	659.655072	172.093911	659.655072	98.900143	659.655072	77.08139	659.655072	172.093911	659.655072	171.472716
661.583888	96.60787	661.583888	92.692304	661.583888	98.56903	661.583888	91.234087	661.583888	172.077458	661.583888	98.783779	661.583888	77.040664	661.583888	172.077458	661.583888	171.36881
663.512704	96.520065	663.512704	92.890883	663.512704	98.688597	663.512704	91.162086	663.512704	172.013305	663.512704	98.68322	663.512704	77.043684	663.512704	172.013305	663.512704	171.303572
665.44152	96.437904	665.44152	93.11694	665.44152	98.932306	665.44152	91.187499	665.44152	171.963694	665.44152	98.604439	665.44152	76.976604	665.44152	171.963694	665.44152	171.232422
667.370336	96.348255	667.370336	93.381262	667.370336	99.071712	667.370336	91.161467	667.370336	171.976456	667.370336	98.53451	667.370336	76.856704	667.370336	171.976456	667.370336	171.147873
669.299152	96.247201	669.299152	93.5454	669.299152	99.096573	669.299152	91.100942	669.299152	171.98685	669.299152	98.447148	669.299152	76.754239	669.299152	171.98685	669.299152	171.029681
671.227968	96.154076	671.227968	93.634124	671.227968	99.05647	671.227968	90.999202	671.227968	171.970381	671.227968	98.334232	671.227968	76.667963	671.227968	171.970381	671.227968	170.905287
673.156784	96.044707	673.156784	93.604758	673.156784	98.891404	673.156784	90.879561	673.156784	171.930285	673.156784	98.197427	673.156784	76.542098	673.156784	171.930285	673.156784	170.82234
675.0856	95.92971	675.0856	93.465914	675.0856	98.773776	675.0856	90.794531	675.0856	171.863471	675.0856	98.057565	675.0856	76.434762	675.0856	171.863471	675.0856	170.789139
677.014416	95.832564	677.014416	93.20906	677.014416	98.601424	677.014416	90.648475	677.014416	171.7997	677.014416	97.949245	677.014416	76.368914	677.014416	171.7997	677.014416	170.766092
678.943232	95.749773	678.943232	92.837317	678.943232	98.375586	678.943232	90.491493	678.943232	171.738622	678.943232	97.870449	678.943232	76.279931	678.943232	171.738622	678.943232	170.712178
680.872048	95.704575	680.872048	92.435792	680.872048	98.109751	680.872048	90.3271	680.872048	171.690761	680.872048	97.797191	680.872048	76.159669	680.872048	171.690761	680.872048	170.603757
682.800864	95.699126	682.800864	91.968816	682.800864	97.86585	682.800864	90.186095	682.800864	171.634469	682.800864	97.732702	682.800864	76.039449	682.800864	171.634469	682.800864	170.478713
684.72968	95.705946	684.72968	91.468233	684.72968	97.652742	684.72968	90.066119	684.72968	171.554243	684.72968	97.65968	684.72968	75.953853	684.72968	171.554243	684.72968	170.356807
686.658496	95.726443	686.658496	91.033478	686.658496	97.3462	686.658496	89.923955	686.658496	171.460858	686.658496	97.569087	686.658496	75.852499	686.658496	171.460858	686.658496	170.293384
688.587312	95.730199	688.587312	90.760841	688.587312	97.120405	688.587312	89.804557	688.587312	171.380665	688.587312	97.463374	688.587312	75.695938	688.587312	171.380665	688.587312	170.271387
690.516128	95.69355	690.516128	90.648344	690.516128	97.044352	690.516128	89.715523	690.516128	171.341032	690.516128	97.328947	690.516128	75.586212	690.516128	171.341032	690.516128	170.257953
692.444944	95.617352	692.444944	90.629992	692.444944	97.026123	692.444944	89.631125	692.444944	171.315073	692.444944	97.175374	692.444944	75.535931	692.444944	171.315073	692.444944	170.227616
694.37376	95.505441	694.37376	90.685804	694.37376	97.069902	694.37376	89.534229	694.37376	171.253952	694.37376	97.045935	694.37376	75.527714	694.37376	171.253952	694.37376	170.168555
696.302576	95.39169	696.302576	90.801144	696.302576	97.068812	696.302576	89.413259	696.302576	171.160427	696.302576	96.933667	696.302576	75.496678	696.302576	171.160427	696.302576	170.092878
698.231392	95.30821	698.231392	90.991121	698.231392	97.092594	698.231392	89.353896	698.231392	171.051023	698.231392	96.846669	698.231392	75.419119	698.231392	171.051023	698.231392	170.038365
700.160208	95.248332	700.160208	91.23587	700.160208	97.14521	700.160208	89.297005	700.160208	170.946793	700.160208	96.786407	700.160208	75.377299	700.160208	170.946793	700.160208	170.022586
702.089024	95.24713	702.089024	91.488246	702.089024	97.142421	702.089024	89.294058	702.089024	170.849477	702.089024	96.708603	702.089024	75.28962	702.089024	170.849477	702.089024	170.050673
704.01784	95.316188	704.01784	91.689538	704.01784	97.067745	704.01784	89.234608	704.01784	170.739734	704.01784	96.626644	704.01784	75.174247	704.01784	170.739734	704.01784	170.06056
705.946656	95.416594	705.946656	91.873821	705.946656	96.964958	705.946656	89.150494	705.946656	170.649839	705.946656	96.539672	705.946656	75.140918	705.946656	170.649839	705.946656	170.034763
707.875472	95.515113	707.875472	91.969323	707.875472	97.001835	707.875472	89.13523	707.875472	170.569834	707.875472	96.353943	707.875472	75.145183	707.875472	170.569834	707.875472	169.96972
709.804288	95.571501	709.804288	91.986361	709.804288	97.065658	709.804288	89.089922	709.804288	170.477922	709.804288	96.214507	709.804288	75.109273	709.804288	170.477922	709.804288	169.895198
711.733104	95.572203	711.733104	91.898175	711.733104	97.08694	711.733104	89.044842	711.733104	170.37412	711.733104	96.115769	711.733104	75.050277	711.733104	170.37412	711.733104	169.830031
713.66192	95.520309	713.66192	91.796158	713.66192	97.164494	713.66192	88.9984	713.66192	170.287868	713.66192	96.059619	713.66192	75.014559	713.66192	170.287868	713.66192	169.787819
715.590736	95.416521	715.590736	91.68434	715.590736	97.271032	715.590736	88.992672	715.590736	170.207387	715.590736	96.053034	715.590736	75.000824	715.590736	170.207387	715.590736	169.755711
717.519552	95.291133	717.519552	91.570763	717.519552	97.427082	717.519552	89.046811	717.519552	170.109968	717.519552	96.061493	717.519552	74.922272	717.519552	170.109968	717.519552	169.730058
719.448368	95.16961	719.448368	91.424021	719.448368	97.495399	719.448368	89.092463	719.448368	170.008718	719.448368	96.042311	719.448368	74.847275	719.448368	170.008718	719.448368	169.693196
721.377184	95.053248	721.377184	91.244609	721.377184	97.482698	721.377184	89.162223	721.377184	169.919776	721.377184	96.010251	721.377184	74.829578	721.377184	169.919776	721.377184	169.629228
723.306	94.96941	723.306	91.110501	723.306	97.493753	723.306	89.177123	723.306	169.865036	723.306	95.961202	723.306	74.826116	723.306	169.865036	723.306	169.569786
725.234816	94.894415	725.234816	90.967879	725.234816	97.490986	725.234816	89.18325	725.234816	169.815905	725.234816	95.891964	725.234816	74.78254	725.234816	169.815905	725.234816	169.545475
727.163632	94.803783	727.163632	90.861169	727.163632	97.462797	727.163632	89.179909	727.163632	169.744635	727.163632	95.833078	727.163632	74.725261	727.163632	169.744635	727.163632	169.560279
729.092448	94.708918	729.092448	90.746627	729.092448	97.275872	729.092448	89.125046	729.092448	169.659046	729.092448	95.798417	729.092448	74.707366	729.092448	169.659046	729.092448	169.613902
731.021264	94.604797	731.021264	90.646428	731.021264	97.045204	731.021264	89.107306	731.021264	169.588191	731.021264	95.793557	731.021264	74.687165	731.021264	169.588191	731.021264	169.649684
732.95008	94.492446	732.95008	90.561002	732.95008	96.950536	732.95008	89.106756	732.95008	169.561941	732.95008	95.806376	732.95008	74.615466	732.95008	169.561941	732.95008	169.64981
734.878896	94.373235	734.878896	90.466609	734.878896	96.80543	734.878896	89.093874	734.878896	169.541292	734.878896	95.791262	734.878896	74.586614	734.878896	169.541292	734.878896	169.628445
736.807712	94.252697	736.807712	90.411658	736.807712	96.616425	736.807712	89.082103	736.807712	169.496495	736.807712	95.745904	736.807712	74.595192	736.807712	169.496495	736.807712	169.614582
738.736528	94.152308	738.736528	90.391927	738.736528	96.404587	738.736528	89.050639	738.736528	169.455269	738.736528	95.683093	738.736528	74.58786	738.736528	169.455269	738.736528	169.628097
740.665344	94.06975	740.665344	90.42637	740.665344	96.317837	740.665344	89.080983	740.665344	169.436951	740.665344	95.602492	740.665344	74.546547	740.665344	169.436951	740.665344	169.659053
742.59416	93.996022	742.59416	90.495548	742.59416	96.412693	742.59416	89.117397	742.59416	169.445632	742.59416	95.531608	742.59416	74.517315	742.59416	169.445632	742.59416	169.699092
744.522976	93.933841	744.522976	90.573788	744.522976	96.47865	744.522976	89.135131	744.522976	169.463666	744.522976	95.476465	744.522976	74.502377	744.522976	169.463666	744.522976	169.735315
746.451792	93.85498	746.451792	90.661142	746.451792	96.526558	746.451792	89.11293	746.451792	169.500662	746.451792	95.435729	746.451792	74.449052	746.451792	169.500662	746.451792	169.739154
748.380608	93.736916	748.380608	90.714966	748.380608	96.599302	748.380608	89.082059	748.380608	169.542392	748.380608	95.419885	748.380608	74.380559	748.380608	169.542392	748.380608	169.71781
750.309424	93.586428	750.309424	90.710989	750.309424	96.777392	750.309424	89.104919	750.309424	169.563282	750.309424	95.40482	750.309424	74.348318	750.309424	169.563282	750.309424	169.705266
752.23824	93.391068	752.23824	90.630919	752.23824	96.956843	752.23824	89.112812	752.23824	169.57894	752.23824	95.370492	752.23824	74.32909	752.23824	169.57894	752.23824	169.704851
754.167056	93.175246	754.167056	90.437397	754.167056	96.910496	754.167056	89.07333	754.167056	169.603814	754.167056	95.332195	754.167056	74.29545	754.167056	169.603814	754.167056	169.721393
756.095872	92.964503	756.095872	90.177427	756.095872	96.825376	756.095872	89.016129	756.095872	169.664238	756.095872	95.284448	756.095872	74.252764	756.095872	169.664238	756.095872	169.745302
758.024688	92.757174	758.024688	89.804396	758.024688	96.824565	758.024688	89.000585	758.024688	169.744883	758.024688	95.227326	758.024688	74.236388	758.024688	169.744883	758.024688	169.74122
759.953504	92.566725	759.953504	89.410547	759.953504	96.860251	759.953504	88.999577	759.953504	169.810127	759.953504	95.190902	759.953504	74.221899	759.953504	169.810127	759.953504	169.702697
761.88232	92.392227	761.88232	89.025838	761.88232	96.824451	761.88232	88.935872	761.88232	169.86	761.88232	95.178635	761.88232	74.172822	761.88232	169.86	761.88232	169.660373
763.811136	92.234076	763.811136	88.677064	763.811136	96.646808	763.811136	88.84674	763.811136	169.915152	763.811136	95.189984	763.811136	74.153164	763.811136	169.915152	763.811136	169.64871
765.739952	92.097086	765.739952	88.385244	765.739952	96.565915	765.739952	88.719265	765.739952	170.00806	765.739952	95.235594	765.739952	74.166287	765.739952	170.00806	765.739952	169.679271
767.668768	91.950035	767.668768	88.116632	767.668768	96.585974	767.668768	88.653029	767.668768	170.11469	767.668768	95.297537	767.668768	74.171694	767.668768	170.11469	767.668768	169.731066
769.597584	91.784024	769.597584	87.958403	769.597584	96.617263	769.597584	88.649808	769.597584	170.217958	769.597584	95.355568	769.597584	74.155839	769.597584	170.217958	769.597584	169.790183
771.5264	91.601739	771.5264	87.842219	771.5264	96.553223	771.5264	88.592063	771.5264	170.330842	771.5264	95.409422	771.5264	74.135003	771.5264	170.330842	771.5264	169.842377
773.455216	91.395466	773.455216	87.832879	773.455216	96.419834	773.455216	88.556665	773.455216	170.444539	773.455216	95.448509	773.455216	74.162659	773.455216	170.444539	773.455216	169.894982
775.384032	91.195696	775.384032	87.857063	775.384032	96.394756	775.384032	88.506702	775.384032	170.563163	775.384032	95.498359	775.384032	74.185623	775.384032	170.563163	775.384032	169.964943
777.312848	91.023506	777.312848	87.911363	777.312848	96.35975	777.312848	88.46097	777.312848	170.695778	777.312848	95.580546	777.312848	74.191765	777.312848	170.695778	777.312848	170.047335
779.241664	90.875447	779.241664	87.994609	779.241664	96.203247	779.241664	88.432274	779.241664	170.844658	779.241664	95.690735	779.241664	74.219807	779.241664	170.844658	779.241664	170.139417
781.17048	90.775454	781.17048	88.062132	781.17048	95.968469	781.17048	88.340233	781.17048	171.010822	781.17048	95.832285	781.17048	74.277012	781.17048	171.010822	781.17048	170.239587
783.099296	90.728007	783.099296	88.133279	783.099296	95.778395	783.099296	88.298485	783.099296	171.178133	783.099296	95.998185	783.099296	74.348312	783.099296	171.178133	783.099296	170.335824
785.028112	90.724291	785.028112	88.132607	785.028112	95.742182	785.028112	88.301767	785.028112	171.354533	785.028112	96.166349	785.028112	74.429769	785.028112	171.354533	785.028112	170.426379
786.956928	90.779917	786.956928	88.120698	786.956928	95.646672	786.956928	88.335282	786.956928	171.523713	786.956928	96.336036	786.956928	74.538862	786.956928	171.523713	786.956928	170.510655
788.885744	90.898686	788.885744	88.058817	788.885744	95.510716	788.885744	88.38592	788.885744	171.702694	788.885744	96.494256	788.885744	74.660888	788.885744	171.702694	788.885744	170.606196
790.81456	91.080425	790.81456	87.958061	790.81456	95.457365	790.81456	88.424777	790.81456	171.897516	790.81456	96.649936	790.81456	74.730265	790.81456	171.897516	790.81456	170.736311
792.743376	91.312806	792.743376	87.864952	792.743376	95.516101	792.743376	88.545942	792.743376	172.079517	792.743376	96.832191	792.743376	74.807984	792.743376	172.079517	792.743376	170.898119
794.672192	91.566083	794.672192	87.813703	794.672192	95.699838	794.672192	88.687927	794.672192	172.252547	794.672192	97.042215	794.672192	74.934662	794.672192	172.252547	794.672192	171.077834
796.601008	91.848159	796.601008	87.856051	796.601008	95.8614	796.601008	88.808458	796.601008	172.450568	796.601008	97.281281	796.601008	75.064099	796.601008	172.450568	796.601008	171.267013
798.529824	92.161356	798.529824	88.026747	798.529824	96.085745	798.529824	88.950675	798.529824	172.68828	798.529824	97.547413	798.529824	75.168828	798.529824	172.68828	798.529824	171.456041
800.45864	92.493847	800.45864	88.347066	800.45864	96.438059	800.45864	89.111664	800.45864	172.922666	800.45864	97.818453	800.45864	75.288135	800.45864	172.922666	800.45864	171.632886
802.387456	92.854081	802.387456	88.822104	802.387456	96.833459	802.387456	89.299626	802.387456	173.119705	802.387456	98.086064	802.387456	75.447435	802.387456	173.119705	802.387456	171.804111
804.316272	93.241785	804.316272	89.424975	804.316272	97.251441	804.316272	89.461747	804.316272	173.323779	804.316272	98.362137	804.316272	75.58787	804.316272	173.323779	804.316272	171.977629
806.245088	93.659062	806.245088	90.15254	806.245088	97.544588	806.245088	89.601271	806.245088	173.5462	806.245088	98.634096	806.245088	75.697179	806.245088	173.5462	806.245088	172.165194
808.173904	94.107977	808.173904	90.936391	808.173904	97.850148	808.173904	89.736932	808.173904	173.778091	808.173904	98.904452	808.173904	75.853214	808.173904	173.778091	808.173904	172.355765
810.10272	94.570336	810.10272	91.691856	810.10272	98.207581	810.10272	89.937541	810.10272	173.999124	810.10272	99.176056	810.10272	76.035225	810.10272	173.999124	810.10272	172.552363
812.031536	95.045288	812.031536	92.408524	812.031536	98.446526	812.031536	90.172772	812.031536	174.204895	812.031536	99.438136	812.031536	76.190969	812.031536	174.204895	812.031536	172.757574
813.960352	95.522096	813.960352	93.017174	813.960352	98.646465	813.960352	90.346512	813.960352	174.408865	813.960352	99.705187	813.960352	76.321199	813.960352	174.408865	813.960352	172.951963
815.889168	95.968452	815.889168	93.551813	815.889168	98.85465	815.889168	90.537018	815.889168	174.585741	815.889168	99.967979	815.889168	76.489614	815.889168	174.585741	815.889168	173.130103
817.817984	96.379575	817.817984	93.985267	817.817984	99.144051	817.817984	90.723883	817.817984	174.750385	817.817984	100.203688	817.817984	76.674327	817.817984	174.750385	817.817984	173.319444
819.7468	96.745659	819.7468	94.35795	819.7468	99.438214	819.7468	90.94047	819.7468	174.911428	819.7468	100.41476	819.7468	76.781759	819.7468	174.911428	819.7468	173.520147
821.675616	97.060692	821.675616	94.651494	821.675616	99.641571	821.675616	91.185676	821.675616	175.051994	821.675616	100.592595	821.675616	76.859302	821.675616	175.051994	821.675616	173.722807
823.604432	97.343861	823.604432	94.851678	823.604432	99.876901	823.604432	91.393239	823.604432	175.166108	823.604432	100.710432	823.604432	76.970003	823.604432	175.166108	823.604432	173.903094
825.533248	97.582975	825.533248	95.027015	825.533248	100.080028	825.533248	91.619856	825.533248	175.224891	825.533248	100.786679	825.533248	77.052596	825.533248	175.224891	825.533248	174.026365
827.462064	97.777094	827.462064	95.107027	827.462064	100.26867	827.462064	91.829917	827.462064	175.24253	827.462064	100.824548	827.462064	77.077087	827.462064	175.24253	827.462064	174.091905
829.39088	97.934036	829.39088	95.147442	829.39088	100.377706	829.39088	92.025399	829.39088	175.238277	829.39088	100.828052	829.39088	77.077576	829.39088	175.238277	829.39088	174.130699
831.319696	98.052494	831.319696	95.108311	831.319696	100.286321	831.319696	92.157022	831.319696	175.217784	831.319696	100.808853	831.319696	77.116369	831.319696	175.217784	831.319696	174.156364
833.248512	98.143518	833.248512	95.017847	833.248512	100.18236	833.248512	92.170386	833.248512	175.167776	833.248512	100.75652	833.248512	77.116184	833.248512	175.167776	833.248512	174.148057
835.177328	98.198322	835.177328	94.867948	835.177328	100.099767	835.177328	92.167498	835.177328	175.056546	835.177328	100.65818	835.177328	77.017362	835.177328	175.056546	835.177328	174.082948
837.106144	98.195379	837.106144	94.673426	837.106144	99.98905	837.106144	92.114962	837.106144	174.898586	837.106144	100.50912	837.106144	76.889857	837.106144	174.898586	837.106144	173.96325
839.03496	98.137765	839.03496	94.482356	839.03496	99.849471	839.03496	92.02012	839.03496	174.710292	839.03496	100.290769	839.03496	76.758731	839.03496	174.710292	839.03496	173.797778
840.963776	98.035071	840.963776	94.287217	840.963776	99.744527	840.963776	91.893091	840.963776	174.50073	840.963776	100.010729	840.963776	76.577231	840.963776	174.50073	840.963776	173.590081
842.892592	97.904612	842.892592	94.132485	842.892592	99.738716	842.892592	91.713414	842.892592	174.265544	842.892592	99.6959	842.892592	76.348899	842.892592	174.265544	842.892592	173.35517
844.821408	97.777189	844.821408	94.018301	844.821408	99.706891	844.821408	91.546191	844.821408	173.99118	844.821408	99.355108	844.821408	76.128665	844.821408	173.99118	844.821408	173.112433
846.750224	97.652812	846.750224	93.931296	846.750224	99.652044	846.750224	91.355066	846.750224	173.702229	846.750224	98.997589	846.750224	75.948099	846.750224	173.702229	846.750224	172.861863
848.67904	97.53999	848.67904	93.852255	848.67904	99.584036	848.67904	91.137554	848.67904	173.386065	848.67904	98.618712	848.67904	75.709109	848.67904	173.386065	848.67904	172.600052
850.607856	97.434578	850.607856	93.763568	850.607856	99.444926	850.607856	90.909015	850.607856	173.038308	850.607856	98.208149	850.607856	75.394267	850.607856	173.038308	850.607856	172.316266
852.536672	97.300552	852.536672	93.651721	852.536672	99.300234	852.536672	90.685713	852.536672	172.681395	852.536672	97.773874	852.536672	75.073784	852.536672	172.681395	852.536672	172.011965
854.465488	97.138308	854.465488	93.48272	854.465488	99.105682	854.465488	90.462132	854.465488	172.334784	854.465488	97.313325	854.465488	74.76245	854.465488	172.334784	854.465488	171.696561
856.394304	96.947289	856.394304	93.246074	856.394304	98.82825	856.394304	90.155257	856.394304	171.993218	856.394304	96.829225	856.394304	74.420864	856.394304	171.993218	856.394304	171.393283
858.32312	96.721634	858.32312	92.949329	858.32312	98.537856	858.32312	89.822315	858.32312	171.628027	858.32312	96.342647	858.32312	74.054012	858.32312	171.628027	858.32312	171.10262
860.251936	96.477664	860.251936	92.557431	860.251936	98.291548	860.251936	89.490139	860.251936	171.251929	860.251936	95.85644	860.251936	73.711738	860.251936	171.251929	860.251936	170.802968
862.180752	96.21978	862.180752	92.136775	862.180752	98.023084	862.180752	89.174751	862.180752	170.884968	862.180752	95.368008	862.180752	73.393902	862.180752	170.884968	862.180752	170.500696
864.109568	95.965514	864.109568	91.672639	864.109568	97.687935	864.109568	88.851031	864.109568	170.522561	864.109568	94.895868	864.109568	73.041598	864.109568	170.522561	864.109568	170.192769
866.038384	95.745922	866.038384	91.195083	866.038384	97.408969	866.038384	88.470574	866.038384	170.158774	866.038384	94.429331	866.038384	72.688346	866.038384	170.158774	866.038384	169.873846
867.9672	95.548434	867.9672	90.74374	867.9672	97.153997	867.9672	88.097402	867.9672	169.783253	867.9672	93.969471	867.9672	72.352439	867.9672	169.783253	867.9672	169.554652
869.896016	95.366069	869.896016	90.304806	869.896016	96.850344	869.896016	87.740763	869.896016	169.419208	869.896016	93.517498	869.896016	72.028876	869.896016	169.419208	869.896016	169.234133
871.824832	95.189785	871.824832	89.931894	871.824832	96.549814	871.824832	87.393417	871.824832	169.074252	871.824832	93.056771	871.824832	71.68746	871.824832	169.074252	871.824832	168.914474
873.753648	94.995853	873.753648	89.572437	873.753648	96.261532	873.753648	87.026009	873.753648	168.73283	873.753648	92.587771	873.753648	71.346038	873.753648	168.73283	873.753648	168.618372
875.682464	94.790061	875.682464	89.279675	875.682464	95.981922	875.682464	86.651243	875.682464	168.390304	875.682464	92.125184	875.682464	71.063358	875.682464	168.390304	875.682464	168.341552
877.61128	94.564997	877.61128	89.00346	877.61128	95.674649	877.61128	86.357201	877.61128	168.038703	877.61128	91.656774	877.61128	70.799423	877.61128	168.038703	877.61128	168.053346
879.540096	94.323679	879.540096	88.763585	879.540096	95.345442	879.540096	86.082787	879.540096	167.680373	879.540096	91.185785	879.540096	70.502075	879.540096	167.680373	879.540096	167.747942
881.468912	94.085264	881.468912	88.557002	881.468912	94.97589	881.468912	85.827377	881.468912	167.315974	881.468912	90.721384	881.468912	70.198453	881.468912	167.315974	881.468912	167.437821
883.397728	93.852212	883.397728	88.356271	883.397728	94.604228	883.397728	85.555566	883.397728	166.951039	883.397728	90.261615	883.397728	69.90935	883.397728	166.951039	883.397728	167.144411
885.326544	93.638912	885.326544	88.167475	885.326544	94.310616	885.326544	85.242139	885.326544	166.595145	885.326544	89.812731	885.326544	69.631976	885.326544	166.595145	885.326544	166.864473
887.25536	93.452613	887.25536	87.942681	887.25536	93.952087	887.25536	84.965268	887.25536	166.238574	887.25536	89.364183	887.25536	69.348442	887.25536	166.238574	887.25536	166.588207
889.184176	93.281572	889.184176	87.720802	889.184176	93.560072	889.184176	84.681022	889.184176	165.875654	889.184176	88.898187	889.184176	69.086684	889.184176	165.875654	889.184176	166.321384
891.112992	93.121648	891.112992	87.450412	891.112992	93.268139	891.112992	84.389382	891.112992	165.49199	891.112992	88.418769	891.112992	68.852154	891.112992	165.49199	891.112992	166.04379
893.041808	92.958524	893.041808	87.165467	893.041808	93.022772	893.041808	84.077665	893.041808	165.090362	893.041808	87.933922	893.041808	68.603625	893.041808	165.090362	893.041808	165.741802
894.970624	92.776176	894.970624	86.872361	894.970624	92.787369	894.970624	83.761316	894.970624	164.703725	894.970624	87.450591	894.970624	68.34493	894.970624	164.703725	894.970624	165.427948
896.89944	92.58514	896.89944	86.547686	896.89944	92.552001	896.89944	83.471708	896.89944	164.340772	896.89944	86.985931	896.89944	68.086875	896.89944	164.340772	896.89944	165.104533
898.828256	92.382731	898.828256	86.211595	898.828256	92.372284	898.828256	83.142976	898.828256	163.97728	898.828256	86.540187	898.828256	67.802073	898.828256	163.97728	898.828256	164.786425
900.757072	92.185178	900.757072	85.875481	900.757072	92.244689	900.757072	82.812831	900.757072	163.579254	900.757072	86.097298	900.757072	67.49924	900.757072	163.579254	900.757072	164.48863
902.685888	92.004706	902.685888	85.539987	902.685888	92.07903	902.685888	82.496431	902.685888	163.158124	902.685888	85.654143	902.685888	67.189075	902.685888	163.158124	902.685888	164.198313
904.614704	91.830156	904.614704	85.199233	904.614704	91.877711	904.614704	82.188574	904.614704	162.747551	904.614704	85.200233	904.614704	66.896763	904.614704	162.747551	904.614704	163.893522
906.54352	91.668464	906.54352	84.8665	906.54352	91.59668	906.54352	81.907254	906.54352	162.346215	906.54352	84.73858	906.54352	66.607232	906.54352	162.346215	906.54352	163.582242
908.472336	91.520317	908.472336	84.550876	908.472336	91.344728	908.472336	81.596122	908.472336	161.943207	908.472336	84.277913	908.472336	66.310029	908.472336	161.943207	908.472336	163.28752
910.401152	91.375107	910.401152	84.232147	910.401152	91.154981	910.401152	81.278197	910.401152	161.536962	910.401152	83.814408	910.401152	66.012234	910.401152	161.536962	910.401152	163.008158
912.329968	91.23634	912.329968	83.915596	912.329968	90.876372	912.329968	80.991228	912.329968	161.126886	912.329968	83.352626	912.329968	65.712183	912.329968	161.126886	912.329968	162.730956
914.258784	91.095029	914.258784	83.628171	914.258784	90.543674	914.258784	80.725916	914.258784	160.694636	914.258784	82.901485	914.258784	65.406086	914.258784	160.694636	914.258784	162.463755
916.1876	90.946578	916.1876	83.330038	916.1876	90.261153	916.1876	80.438446	916.1876	160.253566	916.1876	82.445684	916.1876	65.106584	916.1876	160.253566	916.1876	162.211819
918.116416	90.800379	918.116416	83.061437	918.116416	90.04704	918.116416	80.129168	918.116416	159.823481	918.116416	81.989799	918.116416	64.819381	918.116416	159.823481	918.116416	161.959695
920.045232	90.652371	920.045232	82.818521	920.045232	89.820663	920.045232	79.847973	920.045232	159.402252	920.045232	81.534945	920.045232	64.544895	920.045232	159.402252	920.045232	161.696843
921.974048	90.506561	921.974048	82.620413	921.974048	89.509183	921.974048	79.570659	921.974048	158.988754	921.974048	81.074206	921.974048	64.262172	921.974048	158.988754	921.974048	161.4264
923.902864	90.370226	923.902864	82.436995	923.902864	89.192463	923.902864	79.291334	923.902864	158.571352	923.902864	80.618402	923.902864	63.991715	923.902864	158.571352	923.902864	161.14306
925.83168	90.234653	925.83168	82.264089	925.83168	88.898794	925.83168	78.99164	925.83168	158.148295	925.83168	80.165963	925.83168	63.727514	925.83168	158.148295	925.83168	160.86215
927.760496	90.099121	927.760496	82.110602	927.760496	88.641509	927.760496	78.673306	927.760496	157.735948	927.760496	79.709413	927.760496	63.45182	927.760496	157.735948	927.760496	160.597649
929.689312	89.963726	929.689312	81.920338	929.689312	88.361969	929.689312	78.402061	929.689312	157.336574	929.689312	79.265778	929.689312	63.172606	929.689312	157.336574	929.689312	160.349011
931.618128	89.829381	931.618128	81.708522	931.618128	88.01769	931.618128	78.146168	931.618128	156.947039	931.618128	78.831207	931.618128	62.900521	931.618128	156.947039	931.618128	160.108387
933.546944	89.708776	933.546944	81.438427	933.546944	87.721703	933.546944	77.904601	933.546944	156.549493	933.546944	78.397411	933.546944	62.651507	933.546944	156.549493	933.546944	159.866218
935.47576	89.598718	935.47576	81.138697	935.47576	87.477723	935.47576	77.657886	935.47576	156.15461	935.47576	77.979501	935.47576	62.412354	935.47576	156.15461	935.47576	159.623458
937.404576	89.493614	937.404576	80.796648	937.404576	87.207165	937.404576	77.403427	937.404576	155.77782	937.404576	77.57295	937.404576	62.162783	937.404576	155.77782	937.404576	159.384574
939.333392	89.391849	939.333392	80.443063	939.333392	86.876099	939.333392	77.175528	939.333392	155.406679	939.333392	77.161683	939.333392	61.929507	939.333392	155.406679	939.333392	159.149761
941.262208	89.281831	941.262208	80.089312	941.262208	86.541867	941.262208	76.931677	941.262208	155.037607	941.262208	76.753833	941.262208	61.697882	941.262208	155.037607	941.262208	158.934432
943.191024	89.158943	943.191024	79.723185	943.191024	86.284695	943.191024	76.696103	943.191024	154.676107	943.191024	76.342888	943.191024	61.456838	943.191024	154.676107	943.191024	158.737668
945.11984	89.028309	945.11984	79.395578	945.11984	86.054544	945.11984	76.473744	945.11984	154.33427	945.11984	75.940947	945.11984	61.21611	945.11984	154.33427	945.11984	158.545881
947.048656	88.879019	947.048656	79.099969	947.048656	85.814288	947.048656	76.24413	947.048656	154.009718	947.048656	75.558907	947.048656	61.00215	947.048656	154.009718	947.048656	158.347228
948.977472	88.7217	948.977472	78.8448	948.977472	85.56584	948.977472	76.049708	948.977472	153.693891	948.977472	75.193205	948.977472	60.810198	948.977472	153.693891	948.977472	158.138289
950.906288	88.568865	950.906288	78.619311	950.906288	85.386699	950.906288	75.839305	950.906288	153.385795	950.906288	74.841047	950.906288	60.601842	950.906288	153.385795	950.906288	157.921894
952.835104	88.421225	952.835104	78.40972	952.835104	85.311006	952.835104	75.631489	952.835104	153.083917	952.835104	74.501398	952.835104	60.388671	952.835104	153.083917	952.835104	157.7226
954.76392	88.284797	954.76392	78.213644	954.76392	85.204267	954.76392	75.443431	954.76392	152.790316	954.76392	74.163078	954.76392	60.207768	954.76392	152.790316	954.76392	157.541685
956.692736	88.159681	956.692736	78.01775	956.692736	85.042544	956.692736	75.251648	956.692736	152.499969	956.692736	73.831314	956.692736	60.03003	956.692736	152.499969	956.692736	157.371826
958.621552	88.040459	958.621552	77.813277	958.621552	84.868001	958.621552	75.054764	958.621552	152.22079	958.621552	73.506741	958.621552	59.838397	958.621552	152.22079	958.621552	157.209269
960.550368	87.91657	960.550368	77.610079	960.550368	84.716805	960.550368	74.849086	960.550368	151.972955	960.550368	73.184861	960.550368	59.64512	960.550368	151.972955	960.550368	157.041813
962.479184	87.777999	962.479184	77.398046	962.479184	84.571272	962.479184	74.660281	962.479184	151.748395	962.479184	72.87769	962.479184	59.480241	962.479184	151.748395	962.479184	156.863356
964.408	87.627398	964.408	77.203269	964.408	84.33908	964.408	74.485087	964.408	151.525578	964.408	72.586536	964.408	59.322299	964.408	151.525578	964.408	156.690989
966.336816	87.475713	966.336816	77.001659	966.336816	84.063923	966.336816	74.307404	966.336816	151.290324	966.336816	72.304443	966.336816	59.154163	966.336816	151.290324	966.336816	156.53843
968.265632	87.322218	968.265632	76.806524	968.265632	83.815299	968.265632	74.118585	968.265632	151.057136	968.265632	72.035891	968.265632	58.997339	968.265632	151.057136	968.265632	156.403219
970.194448	87.179243	970.194448	76.588024	970.194448	83.594996	970.194448	73.923908	970.194448	150.847923	970.194448	71.773582	970.194448	58.860917	970.194448	150.847923	970.194448	156.279154
972.123264	87.042814	972.123264	76.334786	972.123264	83.37407	972.123264	73.780652	972.123264	150.656859	972.123264	71.51516	972.123264	58.71347	972.123264	150.656859	972.123264	156.152135
974.05208	86.905793	974.05208	76.065507	974.05208	83.083833	974.05208	73.649505	974.05208	150.484222	974.05208	71.269414	974.05208	58.540879	974.05208	150.484222	974.05208	156.008024
975.980896	86.770385	975.980896	75.761682	975.980896	82.810312	975.980896	73.503611	975.980896	150.317162	975.980896	71.037685	975.980896	58.373165	975.980896	150.317162	975.980896	155.859258
977.909712	86.624907	977.909712	75.470971	977.909712	82.59446	977.909712	73.332983	977.909712	150.152134	977.909712	70.816371	977.909712	58.246336	977.909712	150.152134	977.909712	155.720518
979.838528	86.461714	979.838528	75.166603	979.838528	82.390526	979.838528	73.161034	979.838528	149.992956	979.838528	70.608081	979.838528	58.113347	979.838528	149.992956	979.838528	155.594701
981.767344	86.278422	981.767344	74.883888	981.767344	82.187696	981.767344	73.023722	981.767344	149.844517	981.767344	70.407523	981.767344	57.96296	981.767344	149.844517	981.767344	155.471716
983.69616	86.072728	983.69616	74.62891	983.69616	81.971724	983.69616	72.88061	983.69616	149.717407	983.69616	70.218662	983.69616	57.82899	983.69616	149.717407	983.69616	155.348568
985.624976	85.860702	985.624976	74.401427	985.624976	81.802573	985.624976	72.73667	985.624976	149.608216	985.624976	70.044624	985.624976	57.712759	985.624976	149.608216	985.624976	155.224707
987.553792	85.663876	987.553792	74.211689	987.553792	81.677246	987.553792	72.598222	987.553792	149.508915	987.553792	69.875869	987.553792	57.589834	987.553792	149.508915	987.553792	155.10142
989.482608	85.492867	989.482608	74.046894	989.482608	81.528052	989.482608	72.45809	989.482608	149.403303	989.482608	69.716611	989.482608	57.453339	989.482608	149.403303	989.482608	154.982939
991.411424	85.359129	991.411424	73.923988	991.411424	81.366931	991.411424	72.348254	991.411424	149.286537	991.411424	69.573518	991.411424	57.332332	991.411424	149.286537	991.411424	154.88202
993.34024	85.25125	993.34024	73.80147	993.34024	81.204495	993.34024	72.203492	993.34024	149.185129	993.34024	69.435319	993.34024	57.238103	993.34024	149.185129	993.34024	154.802748
995.269056	85.150456	995.269056	73.684096	995.269056	81.076348	995.269056	72.051473	995.269056	149.10671	995.269056	69.307301	995.269056	57.133596	995.269056	149.10671	995.269056	154.73861
997.197872	85.041882	997.197872	73.535906	997.197872	80.953837	997.197872	71.915624	997.197872	149.037163	997.197872	69.192987	997.197872	57.028709	997.197872	149.037163	997.197872	154.683558
999.126688	84.909306	999.126688	73.363144	999.126688	80.799366	999.126688	71.784271	999.126688	148.963397	999.126688	69.092001	999.126688	56.943885	999.126688	148.963397	999.126688	154.621452
1001.055504	84.753105	1001.055504	73.189503	1001.055504	80.673885	1001.055504	71.667741	1001.055504	148.892937	1001.055504	69.010485	1001.055504	56.872668	1001.055504	148.892937	1001.055504	154.542909
1002.98432	84.578454	1002.98432	73.020248	1002.98432	80.589805	1002.98432	71.549914	1002.98432	148.838341	1002.98432	68.943049	1002.98432	56.793635	1002.98432	148.838341	1002.98432	154.465435
1004.913136	84.386157	1004.913136	72.858081	1004.913136	80.537813	1004.913136	71.441399	1004.913136	148.782392	1004.913136	68.881232	1004.913136	56.705677	1004.913136	148.782392	1004.913136	154.398974
1006.841952	84.191607	1006.841952	72.700501	1006.841952	80.479304	1006.841952	71.345694	1006.841952	148.719151	1006.841952	68.829445	1006.841952	56.647124	1006.841952	148.719151	1006.841952	154.342069
1008.770768	84.004409	1008.770768	72.541733	1008.770768	80.387455	1008.770768	71.24329	1008.770768	148.663189	1008.770768	68.777231	1008.770768	56.610261	1008.770768	148.663189	1008.770768	154.289438
1010.699584	83.827716	1010.699584	72.384648	1010.699584	80.313501	1010.699584	71.143428	1010.699584	148.622203	1010.699584	68.721546	1010.699584	56.55312	1010.699584	148.622203	1010.699584	154.237631
1012.6284	83.672397	1012.6284	72.201268	1012.6284	80.27557	1012.6284	71.038335	1012.6284	148.591052	1012.6284	68.674178	1012.6284	56.493414	1012.6284	148.591052	1012.6284	154.185189
1014.557216	83.523916	1014.557216	71.997061	1014.557216	80.222441	1014.557216	70.967048	1014.557216	148.562592	1014.557216	68.640108	1014.557216	56.460965	1014.557216	148.562592	1014.557216	154.144301
1016.486032	83.369506	1016.486032	71.782432	1016.486032	80.113885	1016.486032	70.895181	1016.486032	148.541037	1016.486032	68.616022	1016.486032	56.446787	1016.486032	148.541037	1016.486032	154.115238
1018.414848	83.217669	1018.414848	71.548136	1018.414848	79.970718	1018.414848	70.811806	1018.414848	148.525804	1018.414848	68.606736	1018.414848	56.402282	1018.414848	148.525804	1018.414848	154.095561
1020.343664	83.057639	1020.343664	71.324754	1020.343664	79.834242	1020.343664	70.725681	1020.343664	148.513407	1020.343664	68.603557	1020.343664	56.350774	1020.343664	148.513407	1020.343664	154.089333
1022.27248	82.890497	1022.27248	71.112162	1022.27248	79.698922	1022.27248	70.656618	1022.27248	148.498844	1022.27248	68.602204	1022.27248	56.327665	1022.27248	148.498844	1022.27248	154.100299
1024.201296	82.731392	1024.201296	70.95102	1024.201296	79.558405	1024.201296	70.616869	1024.201296	148.484072	1024.201296	68.599951	1024.201296	56.310517	1024.201296	148.484072	1024.201296	154.112324
1026.130112	82.575088	1026.130112	70.818435	1026.130112	79.404174	1026.130112	70.576437	1026.130112	148.477968	1026.130112	68.599077	1026.130112	56.278314	1026.130112	148.477968	1026.130112	154.114322
1028.058928	82.424039	1028.058928	70.73681	1028.058928	79.271986	1028.058928	70.519856	1028.058928	148.485573	1028.058928	68.610256	1028.058928	56.258102	1028.058928	148.485573	1028.058928	154.105639
1029.987744	82.277	1029.987744	70.689366	1029.987744	79.178162	1029.987744	70.457944	1029.987744	148.501602	1029.987744	68.636332	1029.987744	56.273612	1029.987744	148.501602	1029.987744	154.105359
1031.91656	82.132922	1031.91656	70.653653	1031.91656	79.105903	1031.91656	70.407485	1031.91656	148.515638	1031.91656	68.669316	1031.91656	56.297303	1031.91656	148.515638	1031.91656	154.127419
1033.845376	81.993843	1033.845376	70.631613	1033.845376	79.031133	1033.845376	70.386429	1033.845376	148.532997	1033.845376	68.714382	1033.845376	56.285036	1033.845376	148.532997	1033.845376	154.174181
1035.774192	81.853188	1035.774192	70.576874	1035.774192	78.961579	1035.774192	70.336945	1035.774192	148.578502	1035.774192	68.775371	1035.774192	56.290482	1035.774192	148.578502	1035.774192	154.22938
1037.703008	81.70239	1037.703008	70.501706	1037.703008	78.928262	1037.703008	70.296673	1037.703008	148.650619	1037.703008	68.851853	1037.703008	56.329944	1037.703008	148.650619	1037.703008	154.287529
1039.631824	81.539861	1039.631824	70.387096	1039.631824	78.918148	1039.631824	70.286861	1039.631824	148.730409	1039.631824	68.94112	1039.631824	56.367756	1039.631824	148.730409	1039.631824	154.34567
1041.56064	81.359089	1041.56064	70.255586	1041.56064	78.896702	1041.56064	70.308459	1041.56064	148.8051	1041.56064	69.038871	1041.56064	56.39995	1041.56064	148.8051	1041.56064	154.415764
1043.489456	81.168415	1043.489456	70.110136	1043.489456	78.877789	1043.489456	70.351014	1043.489456	148.880274	1043.489456	69.14487	1043.489456	56.452205	1043.489456	148.880274	1043.489456	154.504904
1045.418272	80.976969	1045.418272	69.957592	1045.418272	78.857255	1045.418272	70.374234	1045.418272	148.967844	1045.418272	69.266099	1045.418272	56.533093	1045.418272	148.967844	1045.418272	154.604947
1047.347088	80.779667	1047.347088	69.816334	1047.347088	78.872729	1047.347088	70.402753	1047.347088	149.066676	1047.347088	69.396682	1047.347088	56.611813	1047.347088	149.066676	1047.347088	154.714792
1049.275904	80.58368	1049.275904	69.67862	1049.275904	78.910337	1049.275904	70.448079	1049.275904	149.184418	1049.275904	69.537948	1049.275904	56.67785	1049.275904	149.184418	1049.275904	154.840776
1051.20472	80.388465	1051.20472	69.548721	1051.20472	78.931983	1051.20472	70.506641	1051.20472	149.32939	1051.20472	69.695559	1051.20472	56.767897	1051.20472	149.32939	1051.20472	154.962491
1053.133536	80.195785	1053.133536	69.411335	1053.133536	78.964971	1053.133536	70.588014	1053.133536	149.486889	1053.133536	69.865767	1053.133536	56.873329	1053.133536	149.486889	1053.133536	155.081694
1055.062352	80.014052	1055.062352	69.26423	1055.062352	79.015376	1055.062352	70.645913	1055.062352	149.642176	1055.062352	70.046883	1055.062352	56.976814	1055.062352	149.642176	1055.062352	155.20317
1056.991168	79.84208	1056.991168	69.123497	1056.991168	79.109554	1056.991168	70.731185	1056.991168	149.801469	1056.991168	70.240837	1056.991168	57.082648	1056.991168	149.801469	1056.991168	155.334613
1058.919984	79.677233	1058.919984	68.988239	1058.919984	79.216935	1058.919984	70.815106	1058.919984	149.987485	1058.919984	70.438773	1058.919984	57.208317	1058.919984	149.987485	1058.919984	155.483195
1060.8488	79.520598	1060.8488	68.862049	1060.8488	79.278967	1060.8488	70.883024	1060.8488	150.205973	1060.8488	70.638391	1060.8488	57.344788	1060.8488	150.205973	1060.8488	155.65056
1062.777616	79.360181	1062.777616	68.742919	1062.777616	79.31696	1062.777616	70.963569	1062.777616	150.44324	1062.777616	70.839455	1062.777616	57.470076	1062.777616	150.44324	1062.777616	155.822424
1064.706432	79.196396	1064.706432	68.628973	1064.706432	79.322489	1064.706432	71.04285	1064.706432	150.682299	1064.706432	71.050251	1064.706432	57.595927	1064.706432	150.682299	1064.706432	155.995212
1066.635248	79.034859	1066.635248	68.546388	1066.635248	79.332167	1066.635248	71.129082	1066.635248	150.929269	1066.635248	71.276251	1066.635248	57.742315	1066.635248	150.929269	1066.635248	156.165355
1068.564064	78.874989	1068.564064	68.466908	1068.564064	79.33715	1068.564064	71.228852	1068.564064	151.193036	1068.564064	71.511919	1068.564064	57.894535	1068.564064	151.193036	1068.564064	156.335482
1070.49288	78.728939	1070.49288	68.412284	1070.49288	79.293236	1070.49288	71.325123	1070.49288	151.467014	1070.49288	71.748279	1070.49288	58.056596	1070.49288	151.467014	1070.49288	156.515612
1072.421696	78.60019	1072.421696	68.358972	1072.421696	79.283465	1072.421696	71.43525	1072.421696	151.748854	1072.421696	71.985177	1072.421696	58.222669	1072.421696	151.748854	1072.421696	156.701558
1074.350512	78.493375	1074.350512	68.309449	1074.350512	79.318088	1074.350512	71.567117	1074.350512	152.03747	1074.350512	72.217144	1074.350512	58.399652	1074.350512	152.03747	1074.350512	156.900369
1076.279328	78.417759	1076.279328	68.273395	1076.279328	79.383659	1076.279328	71.734086	1076.279328	152.328593	1076.279328	72.442628	1076.279328	58.573697	1076.279328	152.328593	1076.279328	157.109717
1078.208144	78.373995	1078.208144	68.236543	1078.208144	79.456062	1078.208144	71.892462	1078.208144	152.622706	1078.208144	72.66693	1078.208144	58.745164	1078.208144	152.622706	1078.208144	157.309124
1080.13696	78.363998	1080.13696	68.233932	1080.13696	79.524551	1080.13696	72.056563	1080.13696	152.906088	1080.13696	72.888223	1080.13696	58.926195	1080.13696	152.906088	1080.13696	157.502723
1082.065776	78.385408	1082.065776	68.245553	1082.065776	79.631311	1082.065776	72.236639	1082.065776	153.182062	1082.065776	73.105875	1082.065776	59.100168	1082.065776	153.182062	1082.065776	157.693736
1083.994592	78.427487	1083.994592	68.314737	1083.994592	79.764888	1083.994592	72.427768	1083.994592	153.456843	1083.994592	73.329464	1083.994592	59.258886	1083.994592	153.456843	1083.994592	157.878832
1085.923408	78.493762	1085.923408	68.419876	1085.923408	79.912803	1085.923408	72.611381	1085.923408	153.731878	1085.923408	73.551385	1085.923408	59.425993	1085.923408	153.731878	1085.923408	158.05823
1087.852224	78.584811	1087.852224	68.5646	1087.852224	80.038702	1087.852224	72.760493	1087.852224	154.001878	1087.852224	73.769344	1087.852224	59.595853	1087.852224	154.001878	1087.852224	158.236517
1089.78104	78.705977	1089.78104	68.735653	1089.78104	80.143414	1089.78104	72.901278	1089.78104	154.259155	1089.78104	73.988063	1089.78104	59.76545	1089.78104	154.259155	1089.78104	158.407141
1091.709856	78.868093	1091.709856	68.924038	1091.709856	80.317983	1091.709856	73.051823	1091.709856	154.512007	1091.709856	74.200577	1091.709856	59.913758	1091.709856	154.512007	1091.709856	158.560636
1093.638672	79.067081	1093.638672	69.144042	1093.638672	80.529529	1093.638672	73.209962	1093.638672	154.760291	1093.638672	74.402653	1093.638672	60.058109	1093.638672	154.760291	1093.638672	158.689189
1095.567488	79.298256	1095.567488	69.376851	1095.567488	80.724285	1095.567488	73.364905	1095.567488	154.993072	1095.567488	74.596795	1095.567488	60.204356	1095.567488	154.993072	1095.567488	158.795656
1097.496304	79.556033	1097.496304	69.646641	1097.496304	80.920616	1097.496304	73.480724	1097.496304	155.198596	1097.496304	74.782643	1097.496304	60.329871	1097.496304	155.198596	1097.496304	158.897537
1099.42512	79.825276	1099.42512	69.941503	1099.42512	81.147559	1099.42512	73.621964	1099.42512	155.381382	1099.42512	74.969993	1099.42512	60.44538	1099.42512	155.381382	1099.42512	159.006969
1101.353936	80.098417	1101.353936	70.264663	1101.353936	81.420086	1101.353936	73.778227	1101.353936	155.564655	1101.353936	75.153697	1101.353936	60.570527	1101.353936	155.564655	1101.353936	159.121444
1103.282752	80.362835	1103.282752	70.624417	1103.282752	81.706904	1103.282752	73.926421	1103.282752	155.742527	1103.282752	75.332236	1103.282752	60.69661	1103.282752	155.742527	1103.282752	159.229139
1105.211568	80.606913	1105.211568	71.00619	1105.211568	81.982027	1105.211568	74.076285	1105.211568	155.903216	1105.211568	75.511113	1105.211568	60.806688	1105.211568	155.903216	1105.211568	159.329196
1107.140384	80.83319	1107.140384	71.410787	1107.140384	82.248126	1107.140384	74.217446	1107.140384	156.048783	1107.140384	75.690425	1107.140384	60.895191	1107.140384	156.048783	1107.140384	159.425569
1109.0692	81.043651	1109.0692	71.816956	1109.0692	82.539925	1109.0692	74.376925	1109.0692	156.185131	1109.0692	75.858919	1109.0692	60.998118	1109.0692	156.185131	1109.0692	159.518995
1110.998016	81.251823	1110.998016	72.207214	1110.998016	82.858943	1110.998016	74.554331	1110.998016	156.317494	1110.998016	76.019658	1110.998016	61.096901	1110.998016	156.317494	1110.998016	159.608673
1112.926832	81.480597	1112.926832	72.580165	1112.926832	83.112992	1112.926832	74.709052	1112.926832	156.44251	1112.926832	76.169664	1112.926832	61.173332	1112.926832	156.44251	1112.926832	159.701014
1114.855648	81.72875	1114.855648	72.906405	1114.855648	83.300946	1114.855648	74.854194	1114.855648	156.565083	1114.855648	76.312279	1114.855648	61.252743	1114.855648	156.565083	1114.855648	159.80357
1116.784464	81.995643	1116.784464	73.19509	1116.784464	83.483699	1116.784464	74.985133	1116.784464	156.685636	1116.784464	76.458844	1116.784464	61.350957	1116.784464	156.685636	1116.784464	159.910564
1118.71328	82.27868	1118.71328	73.441376	1118.71328	83.658172	1118.71328	75.119508	1118.71328	156.798225	1118.71328	76.607386	1118.71328	61.450129	1118.71328	156.798225	1118.71328	160.006382
1120.642096	82.562479	1120.642096	73.652363	1120.642096	83.795566	1120.642096	75.239074	1120.642096	156.904645	1120.642096	76.758982	1120.642096	61.529901	1120.642096	156.904645	1120.642096	160.088944
1122.570912	82.840684	1122.570912	73.850514	1122.570912	83.875806	1122.570912	75.347309	1122.570912	157.002088	1122.570912	76.914353	1122.570912	61.606836	1122.570912	157.002088	1122.570912	160.17435
1124.499728	83.099088	1124.499728	74.02992	1124.499728	83.948627	1124.499728	75.456602	1124.499728	157.105714	1124.499728	77.061634	1124.499728	61.70388	1124.499728	157.105714	1124.499728	160.272191
1126.428544	83.328285	1126.428544	74.21309	1126.428544	84.05338	1126.428544	75.562119	1126.428544	157.222453	1126.428544	77.20124	1126.428544	61.789426	1126.428544	157.222453	1126.428544	160.380242
1128.35736	83.533205	1128.35736	74.390683	1128.35736	84.19701	1128.35736	75.665428	1128.35736	157.341653	1128.35736	77.340175	1128.35736	61.864693	1128.35736	157.341653	1128.35736	160.494165
1130.286176	83.711619	1130.286176	74.59019	1130.286176	84.346972	1130.286176	75.76925	1130.286176	157.448692	1130.286176	77.472481	1130.286176	61.953839	1130.286176	157.448692	1130.286176	160.608096
1132.214992	83.868426	1132.214992	74.79493	1132.214992	84.475091	1132.214992	75.878562	1132.214992	157.541355	1132.214992	77.604613	1132.214992	62.062791	1132.214992	157.541355	1132.214992	160.71827
1134.143808	84.016705	1134.143808	75.009515	1134.143808	84.658874	1134.143808	76.002233	1134.143808	157.637189	1134.143808	77.744496	1134.143808	62.160236	1134.143808	157.637189	1134.143808	160.825239
1136.072624	84.156805	1136.072624	75.240726	1136.072624	84.902449	1136.072624	76.132891	1136.072624	157.746849	1136.072624	77.891242	1136.072624	62.238451	1136.072624	157.746849	1136.072624	160.927951
1138.00144	84.294517	1138.00144	75.466237	1138.00144	85.11978	1138.00144	76.252665	1138.00144	157.857001	1138.00144	78.050263	1138.00144	62.328266	1138.00144	157.857001	1138.00144	161.026825
1139.930256	84.432333	1139.930256	75.700148	1139.930256	85.290651	1139.930256	76.343247	1139.930256	157.966014	1139.930256	78.206164	1139.930256	62.429892	1139.930256	157.966014	1139.930256	161.125252
1141.859072	84.559531	1141.859072	75.911813	1141.859072	85.433492	1141.859072	76.442185	1141.859072	158.079077	1141.859072	78.353773	1141.859072	62.513516	1141.859072	158.079077	1141.859072	161.224992
1143.787888	84.674477	1143.787888	76.117327	1143.787888	85.58935	1143.787888	76.535538	1143.787888	158.201216	1143.787888	78.498647	1143.787888	62.594202	1143.787888	158.201216	1143.787888	161.318277
1145.716704	84.771677	1145.716704	76.30241	1145.716704	85.716531	1145.716704	76.619502	1145.716704	158.32709	1145.716704	78.641046	1145.716704	62.686979	1145.716704	158.32709	1145.716704	161.399082
1147.64552	84.854094	1147.64552	76.474595	1147.64552	85.793627	1147.64552	76.697679	1147.64552	158.454305	1147.64552	78.781611	1147.64552	62.800975	1147.64552	158.454305	1147.64552	161.469257
1149.574336	84.930362	1149.574336	76.635771	1149.574336	85.858385	1149.574336	76.761861	1149.574336	158.591778	1149.574336	78.933595	1149.574336	62.90591	1149.574336	158.591778	1149.574336	161.538384
1151.503152	85.001437	1151.503152	76.765684	1151.503152	85.946648	1151.503152	76.846184	1151.503152	158.731824	1151.503152	79.092379	1151.503152	62.997164	1151.503152	158.731824	1151.503152	161.608104
1153.431968	85.070019	1153.431968	76.872217	1153.431968	86.097335	1153.431968	76.93735	1153.431968	158.868528	1153.431968	79.260202	1153.431968	63.103415	1153.431968	158.868528	1153.431968	161.68148
1155.360784	85.147469	1155.360784	76.960695	1155.360784	86.257859	1155.360784	77.008685	1155.360784	158.998826	1155.360784	79.439197	1155.360784	63.210059	1155.360784	158.998826	1155.360784	161.764222
1157.2896	85.228517	1157.2896	77.040156	1157.2896	86.38064	1157.2896	77.069572	1157.2896	159.131784	1157.2896	79.618417	1157.2896	63.297975	1157.2896	159.131784	1157.2896	161.853518
1159.218416	85.310047	1159.218416	77.118694	1159.218416	86.52847	1159.218416	77.133125	1159.218416	159.275951	1159.218416	79.792335	1159.218416	63.391434	1159.218416	159.275951	1159.218416	161.940187
1161.147232	85.389076	1161.147232	77.186986	1161.147232	86.718402	1161.147232	77.231894	1161.147232	159.425257	1161.147232	79.961288	1161.147232	63.501854	1161.147232	159.425257	1161.147232	162.030777
1163.076048	85.455977	1163.076048	77.249641	1163.076048	86.913173	1163.076048	77.331071	1163.076048	159.578051	1163.076048	80.117661	1163.076048	63.620945	1163.076048	159.578051	1163.076048	162.124042
1165.004864	85.516011	1165.004864	77.303529	1165.004864	87.056984	1165.004864	77.422969	1165.004864	159.731185	1165.004864	80.272107	1165.004864	63.720463	1165.004864	159.731185	1165.004864	162.223864
1166.93368	85.568038	1166.93368	77.361949	1166.93368	87.143946	1166.93368	77.53034	1166.93368	159.890986	1166.93368	80.435461	1166.93368	63.820743	1166.93368	159.890986	1166.93368	162.331892
1168.862496	85.613494	1168.862496	77.443635	1168.862496	87.2153	1168.862496	77.639649	1168.862496	160.058697	1168.862496	80.608008	1168.862496	63.938415	1168.862496	160.058697	1168.862496	162.451418
1170.791312	85.665894	1170.791312	77.544718	1170.791312	87.267693	1170.791312	77.756658	1170.791312	160.218635	1170.791312	80.790362	1170.791312	64.057424	1170.791312	160.218635	1170.791312	162.576316
1172.720128	85.734353	1172.720128	77.682041	1172.720128	87.3012	1172.720128	77.868446	1172.720128	160.368468	1172.720128	80.976235	1172.720128	64.163395	1172.720128	160.368468	1172.720128	162.695938
1174.648944	85.824873	1174.648944	77.834386	1174.648944	87.315422	1174.648944	77.96285	1174.648944	160.518681	1174.648944	81.153103	1174.648944	64.271076	1174.648944	160.518681	1174.648944	162.80276
1176.57776	85.937015	1176.57776	78.005854	1176.57776	87.34396	1176.57776	78.069983	1176.57776	160.682909	1176.57776	81.322397	1176.57776	64.397365	1176.57776	160.682909	1176.57776	162.907779
1178.506576	86.065061	1178.506576	78.195145	1178.506576	87.426012	1178.506576	78.19178	1178.506576	160.857325	1178.506576	81.483199	1178.506576	64.525477	1178.506576	160.857325	1178.506576	163.020236
1180.435392	86.209675	1180.435392	78.405415	1180.435392	87.55353	1180.435392	78.315472	1180.435392	161.029878	1180.435392	81.641867	1180.435392	64.63537	1180.435392	161.029878	1180.435392	163.142111
1182.364208	86.361958	1182.364208	78.648934	1182.364208	87.70918	1182.364208	78.432997	1182.364208	161.203502	1182.364208	81.811972	1182.364208	64.754239	1182.364208	161.203502	1182.364208	163.265615
1184.293024	86.510511	1184.293024	78.909861	1184.293024	87.887853	1184.293024	78.565497	1184.293024	161.373097	1184.293024	81.995184	1184.293024	64.878668	1184.293024	161.373097	1184.293024	163.383938
1186.22184	86.661877	1186.22184	79.186533	1186.22184	88.102645	1186.22184	78.707762	1186.22184	161.539677	1186.22184	82.187349	1186.22184	64.999688	1186.22184	161.539677	1186.22184	163.491092
1188.150656	86.820126	1188.150656	79.447972	1188.150656	88.344617	1188.150656	78.854138	1188.150656	161.702946	1188.150656	82.388559	1188.150656	65.107223	1188.150656	161.702946	1188.150656	163.592197
1190.079472	86.985983	1190.079472	79.703574	1190.079472	88.566197	1190.079472	79.003009	1190.079472	161.873385	1190.079472	82.58375	1190.079472	65.227451	1190.079472	161.873385	1190.079472	163.688158
1192.008288	87.163493	1192.008288	79.950719	1192.008288	88.753673	1192.008288	79.147659	1192.008288	162.062007	1192.008288	82.772586	1192.008288	65.36352	1192.008288	162.062007	1192.008288	163.787484
1193.937104	87.345108	1193.937104	80.185057	1193.937104	88.915263	1193.937104	79.290071	1193.937104	162.25559	1193.937104	82.963986	1193.937104	65.493867	1193.937104	162.25559	1193.937104	163.890695
1195.86592	87.526672	1195.86592	80.416517	1195.86592	89.079452	1195.86592	79.412052	1195.86592	162.438109	1195.86592	83.157406	1195.86592	65.618509	1195.86592	162.438109	1195.86592	164.003358
1197.794736	87.707811	1197.794736	80.631288	1197.794736	89.221111	1197.794736	79.52045	1197.794736	162.614166	1197.794736	83.356267	1197.794736	65.762442	1197.794736	162.614166	1197.794736	164.1224
1199.723552	87.886074	1199.723552	80.823575	1199.723552	89.340945	1199.723552	79.625598	1199.723552	162.805783	1199.723552	83.564675	1199.723552	65.904501	1199.723552	162.805783	1199.723552	164.238556
1201.652368	88.063859	1201.652368	80.974622	1201.652368	89.48375	1201.652368	79.741771	1201.652368	163.017168	1201.652368	83.776618	1201.652368	66.034326	1201.652368	163.017168	1201.652368	164.346198
1203.581184	88.239019	1203.581184	81.121745	1203.581184	89.63524	1203.581184	79.888031	1203.581184	163.226549	1203.581184	83.995794	1203.581184	66.162166	1203.581184	163.226549	1203.581184	164.451888
1205.51	88.407228	1205.51	81.294701	1205.51	89.809368	1205.51	80.028467	1205.51	163.427866	1205.51	84.225687	1205.51	66.305232	1205.51	163.427866	1205.51	164.564639
1207.438816	88.574756	1207.438816	81.489768	1207.438816	90.010916	1207.438816	80.149359	1207.438816	163.628439	1207.438816	84.45972	1207.438816	66.458094	1207.438816	163.628439	1207.438816	164.69035
1209.367632	88.739378	1209.367632	81.728803	1209.367632	90.219719	1209.367632	80.275295	1209.367632	163.830559	1209.367632	84.689381	1209.367632	66.6077	1209.367632	163.830559	1209.367632	164.824933
1211.296448	88.903366	1211.296448	82.011483	1211.296448	90.443228	1211.296448	80.414271	1211.296448	164.037776	1211.296448	84.914405	1211.296448	66.761899	1211.296448	164.037776	1211.296448	164.962833
1213.225264	89.068686	1213.225264	82.315963	1213.225264	90.677431	1213.225264	80.577124	1213.225264	164.254538	1213.225264	85.132669	1213.225264	66.924996	1213.225264	164.254538	1213.225264	165.095941
1215.15408	89.225948	1215.15408	82.638973	1215.15408	90.925774	1215.15408	80.733988	1215.15408	164.478379	1215.15408	85.353047	1215.15408	67.081757	1215.15408	164.478379	1215.15408	165.222828
1217.082896	89.379767	1217.082896	82.968928	1217.082896	91.137224	1217.082896	80.878595	1217.082896	164.700061	1217.082896	85.575457	1217.082896	67.236133	1217.082896	164.700061	1217.082896	165.348988
1219.011712	89.529772	1219.011712	83.298339	1219.011712	91.309318	1219.011712	81.032456	1219.011712	164.922414	1219.011712	85.806171	1219.011712	67.388023	1219.011712	164.922414	1219.011712	165.479858
1220.940528	89.67932	1220.940528	83.607136	1220.940528	91.486156	1220.940528	81.191932	1220.940528	165.144585	1220.940528	86.05403	1220.940528	67.548816	1220.940528	165.144585	1220.940528	165.619711
1222.869344	89.836799	1222.869344	83.895667	1222.869344	91.624239	1222.869344	81.362065	1222.869344	165.364573	1222.869344	86.316356	1222.869344	67.705218	1222.869344	165.364573	1222.869344	165.771091
1224.79816	90.003303	1224.79816	84.15256	1224.79816	91.747773	1224.79816	81.513469	1224.79816	165.586071	1224.79816	86.569452	1224.79816	67.855851	1224.79816	165.586071	1224.79816	165.928005
1226.726976	90.173295	1226.726976	84.363129	1226.726976	91.882397	1226.726976	81.644534	1226.726976	165.801112	1226.726976	86.80443	1226.726976	68.012428	1226.726976	165.801112	1226.726976	166.080682
1228.655792	90.346657	1228.655792	84.553737	1228.655792	92.003794	1228.655792	81.781935	1228.655792	166.006222	1228.655792	87.025565	1228.655792	68.169494	1228.655792	166.006222	1228.655792	166.214036
1230.584608	90.509742	1230.584608	84.735192	1230.584608	92.14194	1230.584608	81.92904	1230.584608	166.211599	1230.584608	87.237789	1230.584608	68.319048	1230.584608	166.211599	1230.584608	166.327675
1232.513424	90.65464	1232.513424	84.913119	1232.513424	92.314669	1232.513424	82.072787	1232.513424	166.41737	1232.513424	87.454849	1232.513424	68.471997	1232.513424	166.41737	1232.513424	166.436359
1234.44224	90.788258	1234.44224	85.086806	1234.44224	92.514817	1234.44224	82.20412	1234.44224	166.619792	1234.44224	87.682356	1234.44224	68.633197	1234.44224	166.619792	1234.44224	166.557182
1236.371056	90.906817	1236.371056	85.283055	1236.371056	92.707844	1236.371056	82.346968	1236.371056	166.816236	1236.371056	87.907686	1236.371056	68.786076	1236.371056	166.816236	1236.371056	166.691661
1238.299872	91.017352	1238.299872	85.495763	1238.299872	92.907493	1238.299872	82.506219	1238.299872	167.006391	1238.299872	88.129329	1238.299872	68.911854	1238.299872	167.006391	1238.299872	166.835536
1240.228688	91.124955	1240.228688	85.701007	1240.228688	93.150078	1240.228688	82.685396	1240.228688	167.199922	1240.228688	88.33987	1240.228688	69.041998	1240.228688	167.199922	1240.228688	166.971774
1242.157504	91.227503	1242.157504	85.918142	1242.157504	93.402661	1242.157504	82.856744	1242.157504	167.390854	1242.157504	88.53733	1242.157504	69.176842	1242.157504	167.390854	1242.157504	167.09922
1244.08632	91.333149	1244.08632	86.147159	1244.08632	93.661372	1244.08632	83.002536	1244.08632	167.560005	1244.08632	88.719412	1244.08632	69.30936	1244.08632	167.560005	1244.08632	167.220437
1246.015136	91.446325	1246.015136	86.401935	1246.015136	93.907716	1246.015136	83.139835	1246.015136	167.706534	1246.015136	88.883976	1246.015136	69.424099	1246.015136	167.706534	1246.015136	167.338913
1247.943952	91.56577	1247.943952	86.63871	1247.943952	94.114243	1247.943952	83.259021	1247.943952	167.846655	1247.943952	89.049399	1247.943952	69.514521	1247.943952	167.846655	1247.943952	167.464422
1249.872768	91.687371	1249.872768	86.833844	1249.872768	94.325524	1249.872768	83.370321	1249.872768	167.986929	1249.872768	89.231725	1249.872768	69.598344	1249.872768	167.986929	1249.872768	167.600314
1251.801584	91.799092	1251.801584	87.025087	1251.801584	94.502817	1251.801584	83.461556	1251.801584	168.125192	1251.801584	89.423845	1251.801584	69.678433	1251.801584	168.125192	1251.801584	167.738399
1253.7304	91.904563	1253.7304	87.204869	1253.7304	94.598939	1253.7304	83.520251	1253.7304	168.255402	1253.7304	89.603954	1253.7304	69.755709	1253.7304	168.255402	1253.7304	167.868779
1255.659216	92.013205	1255.659216	87.376075	1255.659216	94.666463	1255.659216	83.57318	1255.659216	168.383619	1255.659216	89.765778	1255.659216	69.845379	1255.659216	168.383619	1255.659216	167.979225
1257.588032	92.118951	1257.588032	87.504529	1257.588032	94.74364	1257.588032	83.614538	1257.588032	168.524887	1257.588032	89.909511	1257.588032	69.928821	1257.588032	168.524887	1257.588032	168.069858
1259.516848	92.219917	1259.516848	87.560214	1259.516848	94.83804	1259.516848	83.668483	1259.516848	168.663328	1259.516848	90.04855	1259.516848	70.010564	1259.516848	168.663328	1259.516848	168.14886
1261.445664	92.316147	1261.445664	87.590867	1261.445664	94.904053	1261.445664	83.749713	1261.445664	168.77296	1261.445664	90.177254	1261.445664	70.100953	1261.445664	168.77296	1261.445664	168.236115
1263.37448	92.406265	1263.37448	87.641128	1263.37448	94.933225	1263.37448	83.832698	1263.37448	168.865704	1263.37448	90.295941	1263.37448	70.193309	1263.37448	168.865704	1263.37448	168.337223
1265.303296	92.496043	1265.303296	87.726244	1265.303296	94.976833	1265.303296	83.927048	1265.303296	168.961541	1265.303296	90.419512	1265.303296	70.266532	1265.303296	168.961541	1265.303296	168.44309
1267.232112	92.571961	1267.232112	87.839523	1267.232112	95.087595	1267.232112	84.036974	1267.232112	169.077182	1267.232112	90.543782	1267.232112	70.322346	1267.232112	169.077182	1267.232112	168.53123
1269.160928	92.633315	1269.160928	87.974777	1269.160928	95.270339	1269.160928	84.164317	1269.160928	169.193275	1269.160928	90.66886	1269.160928	70.376427	1269.160928	169.193275	1269.160928	168.601534
1271.089744	92.685025	1271.089744	88.147813	1271.089744	95.43738	1271.089744	84.285316	1271.089744	169.298334	1271.089744	90.799953	1271.089744	70.452385	1271.089744	169.298334	1271.089744	168.665745
1273.01856	92.732178	1273.01856	88.356537	1273.01856	95.570112	1273.01856	84.397698	1273.01856	169.391733	1273.01856	90.924499	1273.01856	70.525176	1273.01856	169.391733	1273.01856	168.736405
1274.947376	92.786768	1274.947376	88.534987	1274.947376	95.752256	1274.947376	84.507838	1274.947376	169.487449	1274.947376	91.05149	1274.947376	70.591586	1274.947376	169.487449	1274.947376	168.820788
1276.876192	92.857817	1276.876192	88.631017	1276.876192	95.978089	1276.876192	84.610879	1276.876192	169.597501	1276.876192	91.188322	1276.876192	70.653381	1276.876192	169.597501	1276.876192	168.912522
1278.805008	92.945088	1278.805008	88.716591	1278.805008	96.140525	1278.805008	84.703874	1278.805008	169.717965	1278.805008	91.310196	1278.805008	70.728235	1278.805008	169.717965	1278.805008	169.002516
1280.733824	93.058487	1280.733824	88.787854	1280.733824	96.145504	1280.733824	84.781837	1280.733824	169.835874	1280.733824	91.431918	1280.733824	70.810412	1280.733824	169.835874	1280.733824	169.086114
1282.66264	93.187974	1282.66264	88.86469	1282.66264	96.078307	1282.66264	84.848702	1282.66264	169.963153	1282.66264	91.5546	1282.66264	70.897138	1282.66264	169.963153	1282.66264	169.159532
1284.591456	93.310131	1284.591456	88.910328	1284.591456	96.032911	1284.591456	84.929081	1284.591456	170.098804	1284.591456	91.661708	1284.591456	70.983685	1284.591456	170.098804	1284.591456	169.227977
1286.520272	93.423606	1286.520272	88.931157	1286.520272	96.048754	1286.520272	85.013289	1286.520272	170.222847	1286.520272	91.758294	1286.520272	71.081451	1286.520272	170.222847	1286.520272	169.296919
1288.449088	93.514892	1288.449088	89.002632	1288.449088	96.076738	1288.449088	85.103547	1288.449088	170.350977	1288.449088	91.857247	1288.449088	71.171143	1288.449088	170.350977	1288.449088	169.379053
1290.377904	93.576614	1290.377904	89.138935	1290.377904	96.117205	1290.377904	85.180378	1290.377904	170.479707	1290.377904	91.958323	1290.377904	71.248915	1290.377904	170.479707	1290.377904	169.476068
1292.30672	93.614173	1292.30672	89.323031	1292.30672	96.227488	1292.30672	85.271565	1292.30672	170.585326	1292.30672	92.064884	1292.30672	71.329986	1292.30672	170.585326	1292.30672	169.576852
1294.235536	93.635661	1294.235536	89.533919	1294.235536	96.442939	1294.235536	85.387129	1294.235536	170.67494	1294.235536	92.165318	1294.235536	71.39584	1294.235536	170.67494	1294.235536	169.668188
1296.164352	93.660211	1296.164352	89.726225	1296.164352	96.709507	1296.164352	85.50258	1296.164352	170.756406	1296.164352	92.25386	1296.164352	71.40209	1296.164352	170.756406	1296.164352	169.742927
1298.093168	93.692049	1298.093168	89.951243	1298.093168	96.933022	1298.093168	85.623165	1298.093168	170.841056	1298.093168	92.336422	1298.093168	71.385012	1298.093168	170.841056	1298.093168	169.811269
1300.021984	93.728522	1300.021984	90.160448	1300.021984	97.080939	1300.021984	85.706461	1300.021984	170.927078	1300.021984	92.449601	1300.021984	71.391103	1300.021984	170.927078	1300.021984	169.882174
1301.9508	93.767668	1301.9508	90.251061	1301.9508	97.269402	1301.9508	85.739513	1301.9508	171.002525	1301.9508	92.621176	1301.9508	71.422136	1301.9508	171.002525	1301.9508	169.958004
1303.879616	93.809177	1303.879616	90.24229	1303.879616	97.435822	1303.879616	85.759088	1303.879616	171.080959	1303.879616	92.788002	1303.879616	71.451141	1303.879616	171.080959	1303.879616	170.040751
1305.808432	93.863375	1305.808432	90.188279	1305.808432	97.470418	1305.808432	85.772144	1305.808432	171.183757	1305.808432	92.867154	1305.808432	71.472042	1305.808432	171.183757	1305.808432	170.116772
1307.737248	93.937861	1307.737248	90.070316	1307.737248	97.404356	1307.737248	85.765851	1307.737248	171.3258	1307.737248	92.896955	1307.737248	71.500248	1307.737248	171.3258	1307.737248	170.163875
1309.666064	94.005309	1309.666064	89.9327	1309.666064	97.287263	1309.666064	85.763818	1309.666064	171.502223	1309.666064	92.910078	1309.666064	71.56986	1309.666064	171.502223	1309.666064	170.188931
1311.59488	94.053668	1311.59488	89.801287	1311.59488	97.133503	1311.59488	85.765681	1311.59488	171.639068	1311.59488	92.925358	1311.59488	71.670551	1311.59488	171.639068	1311.59488	170.218557
1313.523696	94.100005	1313.523696	89.711568	1313.523696	96.977857	1313.523696	85.758759	1313.523696	171.697969	1313.523696	92.954722	1313.523696	71.781001	1313.523696	171.697969	1313.523696	170.267688
1315.452512	94.152381	1315.452512	89.69552	1315.452512	96.86448	1315.452512	85.793159	1315.452512	171.733351	1315.452512	92.988263	1315.452512	71.790723	1315.452512	171.733351	1315.452512	170.340117
1317.381328	94.209452	1317.381328	89.749119	1317.381328	96.86193	1317.381328	85.872821	1317.381328	171.75976	1317.381328	93.037744	1317.381328	71.734106	1317.381328	171.75976	1317.381328	170.43323
1319.310144	94.255779	1319.310144	89.864592	1319.310144	96.986688	1319.310144	85.991329	1319.310144	171.781453	1319.310144	93.10573	1319.310144	71.671583	1319.310144	171.781453	1319.310144	170.535036
1321.23896	94.285763	1321.23896	90.06687	1321.23896	97.225898	1321.23896	86.072648	1321.23896	171.815781	1321.23896	93.175025	1321.23896	71.621939	1321.23896	171.815781	1321.23896	170.629942
1323.167776	94.316264	1323.167776	90.357249	1323.167776	97.465261	1323.167776	86.059358	1323.167776	171.865547	1323.167776	93.238654	1323.167776	71.597528	1323.167776	171.865547	1323.167776	170.712909
1325.096592	94.342184	1325.096592	90.768127	1325.096592	97.676697	1325.096592	86.02948	1325.096592	171.934063	1325.096592	93.321375	1325.096592	71.58804	1325.096592	171.934063	1325.096592	170.795151
1327.025408	94.361377	1327.025408	91.015756	1327.025408	97.951181	1327.025408	86.02603	1327.025408	171.997467	1327.025408	93.400841	1327.025408	71.580373	1327.025408	171.997467	1327.025408	170.866055
1328.954224	94.379447	1328.954224	90.982749	1328.954224	98.204645	1328.954224	86.039481	1328.954224	172.052667	1328.954224	93.428111	1328.954224	71.608517	1328.954224	172.052667	1328.954224	170.910969
1330.88304	94.41155	1330.88304	90.902657	1330.88304	98.153359	1330.88304	86.094026	1330.88304	172.11817	1330.88304	93.457815	1330.88304	71.657163	1330.88304	172.11817	1330.88304	170.953702
1332.811856	94.455539	1332.811856	90.79456	1332.811856	97.801391	1332.811856	86.145127	1332.811856	172.232114	1332.811856	93.507769	1332.811856	71.717416	1332.811856	172.232114	1332.811856	170.981553
1334.740672	94.504162	1334.740672	90.661263	1334.740672	97.469509	1334.740672	86.176893	1334.740672	172.344999	1334.740672	93.541646	1334.740672	71.794244	1334.740672	172.344999	1334.740672	170.981934
1336.669488	94.565163	1336.669488	90.549242	1336.669488	97.279774	1336.669488	86.195165	1336.669488	172.406373	1336.669488	93.606853	1336.669488	71.900796	1336.669488	172.406373	1336.669488	170.979237
1338.598304	94.635785	1338.598304	90.469895	1338.598304	97.206923	1338.598304	86.185658	1338.598304	172.462324	1338.598304	93.710013	1338.598304	71.924893	1338.598304	172.462324	1338.598304	171.000741
1340.52712	94.698372	1340.52712	90.45805	1340.52712	97.219812	1340.52712	86.193898	1340.52712	172.53813	1340.52712	93.780505	1340.52712	71.905983	1340.52712	172.53813	1340.52712	171.054874
1342.455936	94.759588	1342.455936	90.494711	1342.455936	97.340473	1342.455936	86.275265	1342.455936	172.600977	1342.455936	93.84224	1342.455936	71.899751	1342.455936	172.600977	1342.455936	171.135017
1344.384752	94.809288	1344.384752	90.58329	1344.384752	97.64455	1344.384752	86.355648	1344.384752	172.663538	1344.384752	93.877858	1344.384752	71.876572	1344.384752	172.663538	1344.384752	171.226472
1346.313568	94.830168	1346.313568	90.757182	1346.313568	98.067012	1346.313568	86.408876	1346.313568	172.733061	1346.313568	93.883779	1346.313568	71.870792	1346.313568	172.733061	1346.313568	171.324979
1348.242384	94.840188	1348.242384	91.085152	1348.242384	98.43288	1348.242384	86.509176	1348.242384	172.765541	1348.242384	93.888042	1348.242384	71.904455	1348.242384	172.765541	1348.242384	171.437021
1350.1712	94.841188	1350.1712	91.399726	1350.1712	98.540701	1350.1712	86.602931	1350.1712	172.772448	1350.1712	93.954784	1350.1712	71.892487	1350.1712	172.772448	1350.1712	171.543481
1352.100016	94.840508	1352.100016	91.548495	1352.100016	98.547423	1352.100016	86.69623	1352.100016	172.776632	1352.100016	94.038091	1352.100016	71.898311	1352.100016	172.776632	1352.100016	171.598703
1354.028832	94.846471	1354.028832	91.50204	1354.028832	98.594737	1354.028832	86.86244	1354.028832	172.7893	1354.028832	94.089542	1354.028832	71.908973	1354.028832	172.7893	1354.028832	171.625632
1355.957648	94.851478	1355.957648	91.369853	1355.957648	98.541802	1355.957648	87.006711	1355.957648	172.828133	1355.957648	94.094593	1355.957648	71.90639	1355.957648	172.828133	1355.957648	171.646546
1357.886464	94.835432	1357.886464	91.305658	1357.886464	98.472425	1357.886464	87.042739	1357.886464	172.916446	1357.886464	94.139496	1357.886464	71.913348	1357.886464	172.916446	1357.886464	171.68027
1359.81528	94.812333	1359.81528	91.307393	1359.81528	98.423844	1359.81528	86.933433	1359.81528	173.005347	1359.81528	94.218023	1359.81528	71.990374	1359.81528	173.005347	1359.81528	171.734864
1361.744096	94.790999	1361.744096	91.298321	1361.744096	98.361252	1361.744096	86.742528	1361.744096	173.084241	1361.744096	94.271989	1361.744096	72.066551	1361.744096	173.084241	1361.744096	171.786551
1363.672912	94.792129	1363.672912	91.232261	1363.672912	98.35899	1363.672912	86.634214	1363.672912	173.173298	1363.672912	94.324214	1363.672912	72.014581	1363.672912	173.173298	1363.672912	171.799781
1365.601728	94.811254	1365.601728	91.162468	1365.601728	98.322966	1365.601728	86.588373	1365.601728	173.306486	1365.601728	94.33732	1365.601728	71.880109	1365.601728	173.306486	1365.601728	171.815117
1367.530544	94.820722	1367.530544	91.099371	1367.530544	98.221588	1367.530544	86.584665	1367.530544	173.418432	1367.530544	94.376233	1367.530544	71.828533	1367.530544	173.418432	1367.530544	171.847373
1369.45936	94.806436	1369.45936	91.037002	1369.45936	98.189579	1369.45936	86.553443	1369.45936	173.423924	1369.45936	94.459763	1369.45936	71.84684	1369.45936	173.423924	1369.45936	171.902143
1371.388176	94.762129	1371.388176	91.059044	1371.388176	98.207067	1371.388176	86.503287	1371.388176	173.387753	1371.388176	94.530889	1371.388176	71.865419	1371.388176	173.387753	1371.388176	171.962904
1373.316992	94.71774	1373.316992	91.204243	1373.316992	98.168041	1373.316992	86.490697	1373.316992	173.389741	1373.316992	94.603539	1373.316992	71.853696	1373.316992	173.389741	1373.316992	172.040703
1375.245808	94.697584	1375.245808	91.32619	1375.245808	98.089339	1375.245808	86.531883	1375.245808	173.434577	1375.245808	94.643509	1375.245808	71.779661	1375.245808	173.434577	1375.245808	172.101479
1377.174624	94.690936	1377.174624	91.314911	1377.174624	98.152295	1377.174624	86.590862	1377.174624	173.495792	1377.174624	94.581828	1377.174624	71.75146	1377.174624	173.495792	1377.174624	172.115227
1379.10344	94.698576	1379.10344	91.270875	1379.10344	98.234797	1379.10344	86.628305	1379.10344	173.554924	1379.10344	94.481078	1379.10344	71.739137	1379.10344	173.554924	1379.10344	172.110375
1381.032256	94.724486	1381.032256	91.3919	1381.032256	98.260979	1381.032256	86.624278	1381.032256	173.631826	1381.032256	94.441826	1381.032256	71.695699	1381.032256	173.631826	1381.032256	172.176994
1382.961072	94.758147	1382.961072	91.53335	1382.961072	98.322733	1382.961072	86.57812	1382.961072	173.718426	1382.961072	94.482243	1382.961072	71.689381	1382.961072	173.718426	1382.961072	172.270399
1384.889888	94.816027	1384.889888	91.554519	1384.889888	98.421281	1384.889888	86.553293	1384.889888	173.783385	1384.889888	94.512561	1384.889888	71.704532	1384.889888	173.783385	1384.889888	172.348271
1386.818704	94.898198	1386.818704	91.514847	1386.818704	98.489942	1386.818704	86.567141	1386.818704	173.855024	1386.818704	94.544947	1386.818704	71.67784	1386.818704	173.855024	1386.818704	172.426361
1388.74752	94.980549	1388.74752	91.414716	1388.74752	98.512536	1388.74752	86.579036	1388.74752	173.940213	1388.74752	94.576788	1388.74752	71.602576	1388.74752	173.940213	1388.74752	172.456317
1390.676336	95.048121	1390.676336	91.339362	1390.676336	98.449251	1390.676336	86.612058	1390.676336	174.02509	1390.676336	94.567491	1390.676336	71.634312	1390.676336	174.02509	1390.676336	172.466817
1392.605152	95.117167	1392.605152	91.298489	1392.605152	98.39109	1392.605152	86.672451	1392.605152	174.065409	1392.605152	94.563402	1392.605152	71.69312	1392.605152	174.065409	1392.605152	172.50659
1394.533968	95.155364	1394.533968	91.273614	1394.533968	98.435674	1394.533968	86.675441	1394.533968	174.093049	1394.533968	94.56931	1394.533968	71.584836	1394.533968	174.093049	1394.533968	172.551445
1396.462784	95.173743	1396.462784	91.358455	1396.462784	98.545925	1396.462784	86.676168	1396.462784	174.148614	1396.462784	94.565247	1396.462784	71.524105	1396.462784	174.148614	1396.462784	172.615944
1398.3916	95.206206	1398.3916	91.536542	1398.3916	98.608026	1398.3916	86.697186	1398.3916	174.189657	1398.3916	94.511716	1398.3916	71.474419	1398.3916	174.189657	1398.3916	172.682306
1400.320416	95.248454	1400.320416	91.719416	1400.320416	98.682055	1400.320416	86.681381	1400.320416	174.230638	1400.320416	94.488689	1400.320416	71.326654	1400.320416	174.230638	1400.320416	172.72699
1402.249232	95.298825	1402.249232	91.878615	1402.249232	98.811679	1402.249232	86.700045	1402.249232	174.285077	1402.249232	94.450973	1402.249232	71.242561	1402.249232	174.285077	1402.249232	172.73738
1404.178048	95.348764	1404.178048	92.066064	1404.178048	98.982065	1404.178048	86.769465	1404.178048	174.311296	1404.178048	94.436208	1404.178048	71.173591	1404.178048	174.311296	1404.178048	172.757418
1406.106864	95.400239	1406.106864	92.206077	1406.106864	99.137264	1406.106864	86.822227	1406.106864	174.281193	1406.106864	94.432221	1406.106864	71.10533	1406.106864	174.281193	1406.106864	172.815734
1408.03568	95.448358	1408.03568	92.377969	1408.03568	99.183151	1408.03568	86.801462	1408.03568	174.281074	1408.03568	94.413393	1408.03568	71.086225	1408.03568	174.281074	1408.03568	172.843953
1409.964496	95.496227	1409.964496	92.503859	1409.964496	99.122815	1409.964496	86.806737	1409.964496	174.301279	1409.964496	94.415325	1409.964496	71.106097	1409.964496	174.301279	1409.964496	172.832173
1411.893312	95.542812	1411.893312	92.440675	1411.893312	99.058591	1411.893312	86.844167	1411.893312	174.333226	1411.893312	94.433626	1411.893312	70.992298	1411.893312	174.333226	1411.893312	172.797128
1413.822128	95.587537	1413.822128	92.305945	1413.822128	99.074769	1413.822128	86.888578	1413.822128	174.393566	1413.822128	94.397486	1413.822128	70.881852	1413.822128	174.393566	1413.822128	172.738536
1415.750944	95.619593	1415.750944	92.233977	1415.750944	99.022147	1415.750944	86.854928	1415.750944	174.473253	1415.750944	94.377828	1415.750944	70.88029	1415.750944	174.473253	1415.750944	172.69221
1417.67976	95.64413	1417.67976	92.230073	1417.67976	98.900191	1417.67976	86.753727	1417.67976	174.534564	1417.67976	94.320815	1417.67976	70.904915	1417.67976	174.534564	1417.67976	172.685098
1419.608576	95.660305	1419.608576	92.204045	1419.608576	98.857135	1419.608576	86.690242	1419.608576	174.613605	1419.608576	94.310157	1419.608576	70.92519	1419.608576	174.613605	1419.608576	172.674731
1421.537392	95.696361	1421.537392	92.128066	1421.537392	98.857212	1421.537392	86.698467	1421.537392	174.713726	1421.537392	94.496781	1421.537392	70.930234	1421.537392	174.713726	1421.537392	172.668997
1423.466208	95.749698	1423.466208	92.110491	1423.466208	98.83776	1423.466208	86.741258	1423.466208	174.836519	1423.466208	94.649313	1423.466208	70.872912	1423.466208	174.836519	1423.466208	172.734874
1425.395024	95.823264	1425.395024	92.159083	1425.395024	98.802031	1425.395024	86.814616	1425.395024	174.893949	1425.395024	94.658201	1425.395024	70.865785	1425.395024	174.893949	1425.395024	172.781205
1427.32384	95.883132	1427.32384	92.259277	1427.32384	98.835702	1427.32384	86.911632	1427.32384	174.908119	1427.32384	94.615082	1427.32384	70.975557	1427.32384	174.908119	1427.32384	172.798603
1429.252656	95.872485	1429.252656	92.442428	1429.252656	98.925842	1429.252656	87.030271	1429.252656	175.002605	1429.252656	94.678816	1429.252656	71.112028	1429.252656	175.002605	1429.252656	172.841241
1431.181472	95.841339	1431.181472	92.633123	1431.181472	99.087482	1431.181472	87.15272	1431.181472	175.082752	1431.181472	94.781488	1431.181472	71.211052	1431.181472	175.082752	1431.181472	172.913763
1433.110288	95.822856	1433.110288	92.805519	1433.110288	99.287984	1433.110288	87.282906	1433.110288	175.132661	1433.110288	94.781733	1433.110288	71.193458	1433.110288	175.132661	1433.110288	172.993298
1435.039104	95.830426	1435.039104	93.041877	1435.039104	99.428603	1435.039104	87.421292	1435.039104	175.150221	1435.039104	94.776208	1435.039104	71.199116	1435.039104	175.150221	1435.039104	173.048146
1436.96792	95.847081	1436.96792	93.266091	1436.96792	99.562391	1436.96792	87.486684	1436.96792	175.196696	1436.96792	94.908921	1436.96792	71.244666	1436.96792	175.196696	1436.96792	173.104189
1438.896736	95.871826	1438.896736	93.394285	1438.896736	99.749808	1438.896736	87.518303	1438.896736	175.261857	1438.896736	94.998127	1438.896736	71.28764	1438.896736	175.261857	1438.896736	173.160984
1440.825552	95.919628	1440.825552	93.450076	1440.825552	99.873799	1440.825552	87.548282	1440.825552	175.295012	1440.825552	95.111511	1440.825552	71.303631	1440.825552	175.295012	1440.825552	173.201649
1442.754368	95.999005	1442.754368	93.489593	1442.754368	99.891227	1442.754368	87.554951	1442.754368	175.341813	1442.754368	95.185097	1442.754368	71.290251	1442.754368	175.341813	1442.754368	173.296702
1444.683184	96.076784	1444.683184	93.510968	1444.683184	99.76773	1444.683184	87.48683	1444.683184	175.460167	1444.683184	95.239746	1444.683184	71.266195	1444.683184	175.460167	1444.683184	173.406174
1446.612	96.147096	1446.612	93.359076	1446.612	99.701983	1446.612	87.439496	1446.612	175.53265	1446.612	95.297289	1446.612	71.385923	1446.612	175.53265	1446.612	173.390616
1448.540816	96.195618	1448.540816	93.093566	1448.540816	99.742283	1448.540816	87.440608	1448.540816	175.564129	1448.540816	95.319017	1448.540816	71.42392	1448.540816	175.564129	1448.540816	173.330648
1450.469632	96.211753	1450.469632	92.881262	1450.469632	99.679454	1450.469632	87.4174	1450.469632	175.583556	1450.469632	95.356981	1450.469632	71.386813	1450.469632	175.583556	1450.469632	173.316765
1452.398448	96.202869	1452.398448	92.804386	1452.398448	99.568017	1452.398448	87.410238	1452.398448	175.614971	1452.398448	95.503758	1452.398448	71.347847	1452.398448	175.614971	1452.398448	173.29313
1454.327264	96.200304	1454.327264	92.786532	1454.327264	99.510219	1454.327264	87.43726	1454.327264	175.625274	1454.327264	95.67868	1454.327264	71.347173	1454.327264	175.625274	1454.327264	173.252452
1456.25608	96.198887	1456.25608	92.781363	1456.25608	99.601467	1456.25608	87.437485	1456.25608	175.626213	1456.25608	95.758707	1456.25608	71.351369	1456.25608	175.626213	1456.25608	173.237362
1458.184896	96.224216	1458.184896	92.876089	1458.184896	99.728552	1458.184896	87.457093	1458.184896	175.673355	1458.184896	95.717793	1458.184896	71.359607	1458.184896	175.673355	1458.184896	173.29683
1460.113712	96.25521	1460.113712	93.109415	1460.113712	99.812878	1460.113712	87.500096	1460.113712	175.76041	1460.113712	95.736167	1460.113712	71.370676	1460.113712	175.76041	1460.113712	173.42621
1462.042528	96.269956	1462.042528	93.231586	1462.042528	99.955073	1462.042528	87.56012	1462.042528	175.7994	1462.042528	95.792961	1462.042528	71.40346	1462.042528	175.7994	1462.042528	173.523472
1463.971344	96.278058	1463.971344	93.274397	1463.971344	100.155919	1463.971344	87.612288	1463.971344	175.77174	1463.971344	95.836217	1463.971344	71.568687	1463.971344	175.77174	1463.971344	173.584057
1465.90016	96.295919	1465.90016	93.307499	1465.90016	100.258062	1465.90016	87.667662	1465.90016	175.75054	1465.90016	95.857508	1465.90016	71.58891	1465.90016	175.75054	1465.90016	173.651447
1467.828976	96.331433	1467.828976	93.314289	1467.828976	100.299358	1467.828976	87.78542	1467.828976	175.757428	1467.828976	95.722929	1467.828976	71.604934	1467.828976	175.757428	1467.828976	173.761126
1469.757792	96.369261	1469.757792	93.297444	1469.757792	100.156344	1469.757792	87.942827	1469.757792	175.782434	1469.757792	95.749437	1469.757792	71.694615	1469.757792	175.782434	1469.757792	173.903189
1471.686608	96.401449	1471.686608	93.275835	1471.686608	99.997098	1471.686608	87.98753	1471.686608	175.8367	1471.686608	96.047542	1471.686608	71.747705	1471.686608	175.8367	1471.686608	174.008325
1473.615424	96.406124	1473.615424	93.20808	1473.615424	99.856805	1473.615424	87.911328	1473.615424	175.873335	1473.615424	96.253852	1473.615424	71.748868	1473.615424	175.873335	1473.615424	174.034766
1475.54424	96.456676	1475.54424	93.23482	1475.54424	99.809916	1475.54424	87.801317	1475.54424	175.813779	1475.54424	96.290657	1475.54424	71.820513	1475.54424	175.813779	1475.54424	174.123097
1477.473056	96.575753	1477.473056	93.135833	1477.473056	99.809035	1477.473056	87.770501	1477.473056	175.886975	1477.473056	96.23639	1477.473056	71.940033	1477.473056	175.886975	1477.473056	174.254803
1479.401872	96.642712	1479.401872	92.977671	1479.401872	99.89572	1479.401872	87.723764	1479.401872	176.076546	1479.401872	96.219853	1479.401872	72.032125	1479.401872	176.076546	1479.401872	174.314711
1481.330688	96.677628	1481.330688	92.802379	1481.330688	99.922913	1481.330688	87.699739	1481.330688	176.139834	1481.330688	96.221603	1481.330688	72.053833	1481.330688	176.139834	1481.330688	174.317861
1483.259504	96.700125	1483.259504	92.727898	1483.259504	99.869716	1483.259504	87.681561	1483.259504	176.098452	1483.259504	96.143873	1483.259504	71.918473	1483.259504	176.098452	1483.259504	174.378928
1485.18832	96.721455	1485.18832	92.798244	1485.18832	99.695585	1485.18832	87.583769	1485.18832	176.04867	1485.18832	96.222402	1485.18832	71.907052	1485.18832	176.04867	1485.18832	174.482539
1487.117136	96.728671	1487.117136	92.898557	1487.117136	99.655001	1487.117136	87.667747	1487.117136	176.026385	1487.117136	96.239876	1487.117136	71.845053	1487.117136	176.026385	1487.117136	174.543465
1489.045952	96.688099	1489.045952	92.794535	1489.045952	99.729469	1489.045952	87.912629	1489.045952	175.916066	1489.045952	96.238646	1489.045952	71.76821	1489.045952	175.916066	1489.045952	174.506441
1490.974768	96.63354	1490.974768	92.510869	1490.974768	99.844232	1490.974768	88.010413	1490.974768	175.744398	1490.974768	96.23291	1490.974768	71.715197	1490.974768	175.744398	1490.974768	174.456832
1492.903584	96.596615	1492.903584	92.562117	1492.903584	99.883145	1492.903584	87.953173	1492.903584	175.676697	1492.903584	96.224746	1492.903584	71.670387	1492.903584	175.676697	1492.903584	174.521347
1494.8324	96.569472	1494.8324	92.919883	1494.8324	99.787323	1494.8324	87.77098	1494.8324	175.647641	1494.8324	96.186378	1494.8324	71.638029	1494.8324	175.647641	1494.8324	174.629268
1496.761216	96.544302	1496.761216	92.907592	1496.761216	100.065404	1496.761216	87.632827	1496.761216	175.593554	1496.761216	96.05161	1496.761216	71.444728	1496.761216	175.593554	1496.761216	174.58484
1498.690032	96.502425	1498.690032	92.680393	1498.690032	100.631829	1498.690032	87.46396	1498.690032	175.524884	1498.690032	95.950683	1498.690032	71.221301	1498.690032	175.524884	1498.690032	174.502138
1500.618848	96.463098	1500.618848	92.450202	1500.618848	100.508148	1500.618848	87.25227	1500.618848	175.450997	1500.618848	95.762277	1500.618848	71.054095	1500.618848	175.450997	1500.618848	174.449371
1502.547664	96.449714	1502.547664	92.229446	1502.547664	100.039446	1502.547664	87.144476	1502.547664	175.366231	1502.547664	95.591548	1502.547664	70.863175	1502.547664	175.366231	1502.547664	174.440095
1504.47648	96.43677	1504.47648	91.74501	1504.47648	99.597228	1504.47648	87.042247	1504.47648	175.256695	1504.47648	95.62354	1504.47648	70.745625	1504.47648	175.256695	1504.47648	174.405523
1506.405296	96.372108	1506.405296	91.238028	1506.405296	99.337157	1506.405296	86.968792	1506.405296	175.174916	1506.405296	95.658641	1506.405296	70.700398	1506.405296	175.174916	1506.405296	174.298476
1508.334112	96.286891	1508.334112	91.005611	1508.334112	99.084176	1508.334112	86.828671	1508.334112	175.01811	1508.334112	95.742628	1508.334112	70.643255	1508.334112	175.01811	1508.334112	174.302867
1510.262928	96.265509	1510.262928	90.946384	1510.262928	98.783838	1510.262928	86.561787	1510.262928	174.850476	1510.262928	95.719937	1510.262928	70.631046	1510.262928	174.850476	1510.262928	174.309506
1512.191744	96.258691	1512.191744	90.954447	1512.191744	98.668887	1512.191744	86.349442	1512.191744	174.840013	1512.191744	95.541978	1512.191744	70.64368	1512.191744	174.840013	1512.191744	174.27232
1514.12056	96.24284	1514.12056	90.917151	1514.12056	98.581567	1514.12056	86.265928	1514.12056	174.876102	1514.12056	95.42745	1514.12056	70.555291	1514.12056	174.876102	1514.12056	174.225228
1516.049376	96.205615	1516.049376	90.788199	1516.049376	98.957319	1516.049376	86.268325	1516.049376	174.914334	1516.049376	95.247029	1516.049376	70.362354	1516.049376	174.914334	1516.049376	174.184577
1517.978192	96.175552	1517.978192	90.729851	1517.978192	99.373898	1517.978192	86.175715	1517.978192	174.870949	1517.978192	95.12641	1517.978192	70.351714	1517.978192	174.870949	1517.978192	174.210087
1519.907008	96.144799	1519.907008	91.11682	1519.907008	99.185815	1519.907008	86.060058	1519.907008	174.760146	1519.907008	94.897995	1519.907008	70.281336	1519.907008	174.760146	1519.907008	174.390947
1521.835824	96.085942	1521.835824	91.433792	1521.835824	98.961395	1521.835824	86.114232	1521.835824	174.678936	1521.835824	94.776012	1521.835824	70.191196	1521.835824	174.678936	1521.835824	174.467333
1523.76464	96.04688	1523.76464	91.072245	1523.76464	98.876415	1523.76464	86.220305	1523.76464	174.606543	1523.76464	94.961128	1523.76464	70.216064	1523.76464	174.606543	1523.76464	174.360847
1525.693456	96.020251	1525.693456	90.639705	1525.693456	98.81283	1525.693456	86.506981	1525.693456	174.611539	1525.693456	95.080309	1525.693456	70.294015	1525.693456	174.611539	1525.693456	174.367485
1527.622272	96.018986	1527.622272	90.686941	1527.622272	98.504451	1527.622272	86.625832	1527.622272	174.562926	1527.622272	95.090674	1527.622272	70.420212	1527.622272	174.562926	1527.622272	174.505555
1529.551088	96.029783	1529.551088	90.80383	1529.551088	98.243055	1529.551088	86.515358	1529.551088	174.523743	1529.551088	95.045284	1529.551088	70.545078	1529.551088	174.523743	1529.551088	174.579591
1531.479904	96.052256	1531.479904	90.740645	1531.479904	98.609689	1531.479904	86.439986	1531.479904	174.59701	1531.479904	95.036914	1531.479904	70.682725	1531.479904	174.59701	1531.479904	174.594536
1533.40872	96.083394	1533.40872	90.5572	1533.40872	98.82829	1533.40872	86.390985	1533.40872	174.763651	1533.40872	95.259572	1533.40872	70.58563	1533.40872	174.763651	1533.40872	174.538256
1535.337536	96.127538	1535.337536	90.586474	1535.337536	98.926961	1535.337536	86.404383	1535.337536	175.078116	1535.337536	95.463341	1535.337536	70.359296	1535.337536	175.078116	1535.337536	174.524828
1537.266352	96.218836	1537.266352	90.637107	1537.266352	98.805047	1537.266352	86.309201	1537.266352	175.306106	1537.266352	95.526395	1537.266352	70.47394	1537.266352	175.306106	1537.266352	174.466066
1539.195168	96.308275	1539.195168	90.64834	1539.195168	98.69925	1539.195168	86.250159	1539.195168	175.325661	1539.195168	95.636066	1539.195168	70.708486	1539.195168	175.325661	1539.195168	174.393382
1541.123984	96.329427	1541.123984	90.664309	1541.123984	98.737358	1541.123984	86.397925	1541.123984	175.438188	1541.123984	95.956018	1541.123984	70.919648	1541.123984	175.438188	1541.123984	174.366176
1543.0528	96.377019	1543.0528	90.620485	1543.0528	98.787259	1543.0528	86.70863	1543.0528	175.622663	1543.0528	96.434018	1543.0528	71.126169	1543.0528	175.622663	1543.0528	174.334792
1544.981616	96.46339	1544.981616	90.66799	1544.981616	98.835181	1544.981616	87.083898	1544.981616	175.78098	1544.981616	96.771451	1544.981616	71.288895	1544.981616	175.78098	1544.981616	174.418356
1546.910432	96.584694	1546.910432	91.024142	1546.910432	98.707352	1546.910432	87.413043	1546.910432	175.932029	1546.910432	96.810094	1546.910432	71.457321	1546.910432	175.932029	1546.910432	174.586449
1548.839248	96.6988	1548.839248	91.6149	1548.839248	98.880468	1548.839248	87.710093	1548.839248	176.162709	1548.839248	96.936263	1548.839248	71.770798	1548.839248	176.162709	1548.839248	174.578849
1550.768064	96.812474	1550.768064	92.104609	1550.768064	99.771511	1550.768064	88.07131	1550.768064	176.450129	1550.768064	97.144385	1550.768064	71.99891	1550.768064	176.450129	1550.768064	174.57568
1552.69688	96.935062	1552.69688	92.715484	1552.69688	100.562524	1552.69688	88.469356	1552.69688	176.664958	1552.69688	97.429848	1552.69688	72.185007	1552.69688	176.664958	1552.69688	174.690745
1554.625696	97.031439	1554.625696	93.510551	1554.625696	101.12157	1554.625696	88.778689	1554.625696	176.864292	1554.625696	97.704707	1554.625696	72.506929	1554.625696	176.864292	1554.625696	174.80603
1556.554512	97.127574	1556.554512	94.047388	1556.554512	101.406212	1556.554512	88.988965	1556.554512	177.04849	1556.554512	97.962052	1556.554512	72.867426	1556.554512	177.04849	1556.554512	174.83788
1558.483328	97.223123	1558.483328	94.365295	1558.483328	101.596311	1558.483328	89.361246	1558.483328	177.217511	1558.483328	98.338756	1558.483328	73.166031	1558.483328	177.217511	1558.483328	174.835415
1560.412144	97.322897	1560.412144	94.4711	1560.412144	101.750667	1560.412144	89.851864	1560.412144	177.419505	1560.412144	98.564737	1560.412144	73.493331	1560.412144	177.419505	1560.412144	174.798704
1562.34096	97.436186	1562.34096	94.60376	1562.34096	101.720197	1562.34096	90.15423	1562.34096	177.633244	1562.34096	98.759627	1562.34096	73.808047	1562.34096	177.633244	1562.34096	174.862309
1564.269776	97.556949	1564.269776	94.744577	1564.269776	101.561912	1564.269776	90.322608	1564.269776	177.795989	1564.269776	98.949507	1564.269776	74.046806	1564.269776	177.795989	1564.269776	174.971198
1566.198592	97.663309	1566.198592	94.737366	1566.198592	101.305204	1566.198592	90.406435	1566.198592	177.910358	1566.198592	99.119492	1566.198592	74.282202	1566.198592	177.910358	1566.198592	175.006451
1568.127408	97.756335	1568.127408	94.659304	1568.127408	101.335052	1568.127408	90.523733	1568.127408	178.100587	1568.127408	99.314245	1568.127408	74.515864	1568.127408	178.100587	1568.127408	175.076742
1570.056224	97.878398	1570.056224	94.486771	1570.056224	101.632231	1570.056224	90.600233	1570.056224	178.352744	1570.056224	99.540717	1570.056224	74.653542	1570.056224	178.352744	1570.056224	175.16226
1571.98504	98.0297	1571.98504	94.434152	1571.98504	101.861966	1571.98504	90.59026	1571.98504	178.465172	1571.98504	99.696831	1571.98504	74.832716	1571.98504	178.465172	1571.98504	175.314077
1573.913856	98.118387	1573.913856	94.675087	1573.913856	101.94084	1573.913856	90.545943	1573.913856	178.504	1573.913856	99.793959	1573.913856	75.023911	1573.913856	178.504	1573.913856	175.416008
1575.842672	98.180411	1575.842672	94.999631	1575.842672	101.951674	1575.842672	90.447015	1575.842672	178.495548	1575.842672	100.032092	1575.842672	75.146982	1575.842672	178.495548	1575.842672	175.401965
1577.771488	98.229461	1577.771488	95.139087	1577.771488	101.949401	1577.771488	90.422406	1577.771488	178.511797	1577.771488	100.269117	1577.771488	75.250383	1577.771488	178.511797	1577.771488	175.444198
1579.700304	98.289839	1579.700304	95.209692	1579.700304	102.048665	1579.700304	90.549461	1579.700304	178.520012	1579.700304	100.280534	1579.700304	75.301267	1579.700304	178.520012	1579.700304	175.498853
1581.62912	98.339695	1581.62912	95.263893	1581.62912	102.094814	1581.62912	90.766045	1581.62912	178.466213	1581.62912	100.334579	1581.62912	75.305486	1581.62912	178.466213	1581.62912	175.561801
1583.557936	98.363835	1583.557936	95.338618	1583.557936	102.085257	1583.557936	90.825934	1583.557936	178.435187	1583.557936	100.297683	1583.557936	75.168321	1583.557936	178.435187	1583.557936	175.647696
1585.486752	98.391827	1585.486752	95.376759	1585.486752	102.17859	1585.486752	90.814223	1585.486752	178.354791	1585.486752	100.292414	1585.486752	75.115497	1585.486752	178.354791	1585.486752	175.666684
1587.415568	98.416545	1587.415568	95.394796	1587.415568	102.340091	1587.415568	90.799884	1587.415568	178.372375	1587.415568	100.38117	1587.415568	75.396423	1587.415568	178.372375	1587.415568	175.697446
1589.344384	98.446429	1589.344384	95.475337	1589.344384	102.391689	1589.344384	90.811071	1589.344384	178.512715	1589.344384	100.374526	1589.344384	75.494109	1589.344384	178.512715	1589.344384	175.776525
1591.2732	98.467722	1591.2732	95.589014	1591.2732	102.441791	1591.2732	90.781703	1591.2732	178.584505	1591.2732	100.449853	1591.2732	75.42652	1591.2732	178.584505	1591.2732	175.798905
1593.202016	98.476427	1593.202016	95.610876	1593.202016	102.510227	1593.202016	90.669928	1593.202016	178.588893	1593.202016	100.527929	1593.202016	75.32361	1593.202016	178.588893	1593.202016	175.751911
1595.130832	98.461823	1595.130832	95.587891	1595.130832	102.536586	1595.130832	90.566169	1595.130832	178.61487	1595.130832	100.7026	1595.130832	75.30954	1595.130832	178.61487	1595.130832	175.746383
1597.059648	98.440971	1597.059648	95.497014	1597.059648	102.549247	1597.059648	90.525278	1597.059648	178.621817	1597.059648	100.767048	1597.059648	75.384248	1597.059648	178.621817	1597.059648	175.759352
1598.988464	98.422775	1598.988464	95.370349	1598.988464	102.547095	1598.988464	90.50443	1598.988464	178.665338	1598.988464	100.722831	1598.988464	75.319611	1598.988464	178.665338	1598.988464	175.776364
1600.91728	98.415352	1600.91728	95.213545	1600.91728	102.469515	1600.91728	90.50113	1600.91728	178.678197	1600.91728	100.858966	1600.91728	75.213132	1600.91728	178.678197	1600.91728	175.786822
1602.846096	98.390179	1602.846096	95.063085	1602.846096	102.34761	1602.846096	90.48929	1602.846096	178.656511	1602.846096	100.957347	1602.846096	75.163756	1602.846096	178.656511	1602.846096	175.838772
1604.774912	98.380739	1604.774912	95.057699	1604.774912	102.194573	1604.774912	90.496413	1604.774912	178.639932	1604.774912	101.037183	1604.774912	75.176871	1604.774912	178.639932	1604.774912	175.882238
1606.703728	98.403787	1606.703728	95.102307	1606.703728	102.083884	1606.703728	90.521848	1606.703728	178.708233	1606.703728	101.119698	1606.703728	75.20635	1606.703728	178.708233	1606.703728	175.854498
1608.632544	98.416679	1608.632544	95.136591	1608.632544	102.159923	1608.632544	90.561346	1608.632544	178.782392	1608.632544	101.036521	1608.632544	75.248137	1608.632544	178.782392	1608.632544	175.831452
1610.56136	98.397406	1610.56136	95.166873	1610.56136	102.314486	1610.56136	90.605464	1610.56136	178.834308	1610.56136	101.140626	1610.56136	75.208247	1610.56136	178.834308	1610.56136	175.841673
1612.490176	98.36333	1612.490176	95.233231	1612.490176	102.459352	1612.490176	90.640082	1612.490176	178.884661	1612.490176	101.31898	1612.490176	75.162271	1612.490176	178.884661	1612.490176	175.810317
1614.418992	98.31895	1614.418992	95.34553	1614.418992	102.590561	1614.418992	90.620836	1614.418992	178.903851	1614.418992	101.241525	1614.418992	75.180653	1614.418992	178.903851	1614.418992	175.783996
1616.347808	98.294919	1616.347808	95.464526	1616.347808	102.683357	1616.347808	90.632539	1616.347808	178.891943	1616.347808	101.152897	1616.347808	75.220376	1616.347808	178.891943	1616.347808	175.745576
1618.276624	98.263139	1618.276624	95.530246	1618.276624	102.752114	1618.276624	90.760014	1618.276624	178.98278	1618.276624	101.351493	1618.276624	75.286665	1618.276624	178.98278	1618.276624	175.668632
1620.20544	98.195855	1620.20544	95.474718	1620.20544	102.736701	1620.20544	90.909059	1620.20544	179.04987	1620.20544	101.508902	1620.20544	75.338992	1620.20544	179.04987	1620.20544	175.589425
1622.134256	98.127014	1622.134256	95.491307	1622.134256	102.617737	1622.134256	91.007681	1622.134256	178.96778	1622.134256	101.600837	1622.134256	75.281399	1622.134256	178.96778	1622.134256	175.598883
1624.063072	98.133668	1624.063072	95.6095	1624.063072	102.355487	1624.063072	91.027332	1624.063072	178.894919	1624.063072	101.643677	1624.063072	75.279938	1624.063072	178.894919	1624.063072	175.604461
1625.991888	98.148983	1625.991888	95.663263	1625.991888	102.364278	1625.991888	90.963514	1625.991888	178.998785	1625.991888	101.73425	1625.991888	75.32299	1625.991888	178.998785	1625.991888	175.540397
1627.920704	98.157804	1627.920704	95.631924	1627.920704	102.634213	1627.920704	90.959749	1627.920704	179.129597	1627.920704	101.831352	1627.920704	75.108477	1627.920704	179.129597	1627.920704	175.477414
1629.84952	98.168246	1629.84952	95.56636	1629.84952	102.738767	1629.84952	90.89311	1629.84952	179.229954	1629.84952	101.833696	1629.84952	74.9311	1629.84952	179.229954	1629.84952	175.441101
1631.778336	98.188194	1631.778336	95.533974	1631.778336	102.714322	1631.778336	90.685234	1631.778336	179.286069	1631.778336	101.824511	1631.778336	74.959544	1631.778336	179.286069	1631.778336	175.386892
1633.707152	98.203376	1633.707152	95.576036	1633.707152	102.604211	1633.707152	90.451254	1633.707152	179.341578	1633.707152	101.903012	1633.707152	74.992481	1633.707152	179.341578	1633.707152	175.375347
1635.635968	98.209788	1635.635968	95.47915	1635.635968	102.4109	1635.635968	90.507052	1635.635968	179.422239	1635.635968	101.931613	1635.635968	75.052092	1635.635968	179.422239	1635.635968	175.354534
1637.564784	98.217304	1637.564784	95.195775	1637.564784	102.493081	1637.564784	90.730367	1637.564784	179.465634	1637.564784	101.901078	1637.564784	75.049422	1637.564784	179.465634	1637.564784	175.283291
1639.4936	98.232236	1639.4936	94.921599	1639.4936	102.448325	1639.4936	90.900368	1639.4936	179.47866	1639.4936	101.956341	1639.4936	75.040697	1639.4936	179.47866	1639.4936	175.291085
1641.422416	98.242708	1641.422416	95.103493	1641.422416	102.118466	1641.422416	90.996792	1641.422416	179.540923	1641.422416	101.976745	1641.422416	75.084768	1641.422416	179.540923	1641.422416	175.331504
1643.351232	98.248218	1643.351232	95.36789	1643.351232	101.977474	1643.351232	91.085298	1643.351232	179.589383	1643.351232	101.994895	1643.351232	75.203227	1643.351232	179.589383	1643.351232	175.240193
1645.280048	98.272606	1645.280048	95.533812	1645.280048	102.639234	1645.280048	91.159191	1645.280048	179.628052	1645.280048	101.890461	1645.280048	75.279984	1645.280048	179.628052	1645.280048	175.123381
1647.208864	98.323213	1647.208864	95.635134	1647.208864	103.317228	1647.208864	91.232385	1647.208864	179.731408	1647.208864	101.787439	1647.208864	75.2926	1647.208864	179.731408	1647.208864	175.077301
1649.13768	98.389677	1649.13768	95.921022	1649.13768	103.647886	1649.13768	91.275752	1649.13768	179.805713	1649.13768	101.803516	1649.13768	75.243187	1649.13768	179.805713	1649.13768	175.155448
1651.066496	98.431191	1651.066496	96.248838	1651.066496	103.777513	1651.066496	91.310073	1651.066496	179.884021	1651.066496	101.793668	1651.066496	75.176231	1651.066496	179.884021	1651.066496	175.188725
1652.995312	98.464496	1652.995312	96.375284	1652.995312	103.783527	1652.995312	91.322559	1652.995312	179.892771	1652.995312	101.861816	1652.995312	75.233639	1652.995312	179.892771	1652.995312	175.147955
1654.924128	98.498327	1654.924128	96.387297	1654.924128	103.720324	1654.924128	91.352366	1654.924128	179.84827	1654.924128	101.873868	1654.924128	75.37702	1654.924128	179.84827	1654.924128	175.1843
1656.852944	98.530709	1656.852944	96.355228	1656.852944	103.667743	1656.852944	91.413097	1656.852944	179.873976	1656.852944	101.667913	1656.852944	75.520203	1656.852944	179.873976	1656.852944	175.290002
1658.78176	98.559993	1658.78176	96.260334	1658.78176	103.276443	1658.78176	91.451616	1658.78176	179.904178	1658.78176	101.514841	1658.78176	75.357961	1658.78176	179.904178	1658.78176	175.386815
1660.710576	98.574924	1660.710576	96.113992	1660.710576	102.847292	1660.710576	91.458253	1660.710576	179.885401	1660.710576	101.496283	1660.710576	75.111373	1660.710576	179.885401	1660.710576	175.49232
1662.639392	98.572104	1662.639392	95.802298	1662.639392	102.740496	1662.639392	91.342768	1662.639392	179.823847	1662.639392	101.280244	1662.639392	75.144665	1662.639392	179.823847	1662.639392	175.555663
1664.568208	98.576092	1664.568208	95.523026	1664.568208	102.93241	1664.568208	91.139127	1664.568208	179.759279	1664.568208	101.242906	1664.568208	75.167859	1664.568208	179.759279	1664.568208	175.604283
1666.497024	98.630662	1666.497024	95.524382	1666.497024	102.972883	1666.497024	91.053171	1666.497024	179.672948	1666.497024	101.178678	1666.497024	75.104033	1666.497024	179.672948	1666.497024	175.770471
1668.42584	98.645648	1668.42584	95.716443	1668.42584	102.983313	1668.42584	90.936721	1668.42584	179.616181	1668.42584	101.086722	1668.42584	75.065327	1668.42584	179.616181	1668.42584	175.818308
1670.354656	98.642239	1670.354656	95.622057	1670.354656	103.029481	1670.354656	90.754593	1670.354656	179.444945	1670.354656	101.082947	1670.354656	74.924654	1670.354656	179.444945	1670.354656	175.815676
1672.283472	98.64923	1672.283472	95.532156	1672.283472	102.932427	1672.283472	90.672719	1672.283472	179.338203	1672.283472	101.192675	1672.283472	74.763138	1672.283472	179.338203	1672.283472	175.867893
1674.212288	98.647148	1674.212288	95.558871	1674.212288	102.770478	1674.212288	90.735019	1674.212288	179.321366	1674.212288	101.19958	1674.212288	74.579202	1674.212288	179.321366	1674.212288	175.875267
1676.141104	98.644058	1676.141104	95.519985	1676.141104	102.711179	1676.141104	90.666806	1676.141104	179.341751	1676.141104	101.007717	1676.141104	74.227926	1676.141104	179.341751	1676.141104	175.914821
1678.06992	98.642511	1678.06992	95.364362	1678.06992	102.763986	1678.06992	90.620256	1678.06992	179.27565	1678.06992	100.847061	1678.06992	74.049398	1678.06992	179.27565	1678.06992	175.926723
1679.998736	98.622504	1679.998736	95.106664	1679.998736	102.795175	1679.998736	90.451563	1679.998736	179.183406	1679.998736	100.725191	1679.998736	74.110362	1679.998736	179.183406	1679.998736	175.926439
1681.927552	98.612968	1681.927552	94.876041	1681.927552	102.589112	1681.927552	90.348755	1681.927552	179.257893	1681.927552	100.747184	1681.927552	74.202424	1681.927552	179.257893	1681.927552	176.052633
1683.856368	98.668564	1683.856368	94.914631	1683.856368	102.263722	1683.856368	90.425642	1683.856368	179.381429	1683.856368	100.813379	1683.856368	74.221115	1683.856368	179.381429	1683.856368	176.215024
1685.785184	98.770873	1685.785184	94.732681	1685.785184	102.18096	1685.785184	90.48553	1685.785184	179.385213	1685.785184	100.664761	1685.785184	74.254019	1685.785184	179.385213	1685.785184	176.26781
1687.714	98.816953	1687.714	94.682135	1687.714	102.428419	1687.714	90.518399	1687.714	179.355634	1687.714	100.543709	1687.714	74.294247	1687.714	179.355634	1687.714	176.39127
1689.642816	98.847425	1689.642816	95.050771	1689.642816	102.463175	1689.642816	90.589837	1689.642816	179.341824	1689.642816	100.687218	1689.642816	74.467681	1689.642816	179.341824	1689.642816	176.458245
1691.571632	98.882439	1691.571632	95.450696	1691.571632	102.532307	1691.571632	90.648974	1691.571632	179.354498	1691.571632	100.793923	1691.571632	74.604245	1691.571632	179.354498	1691.571632	176.485729
1693.500448	98.90803	1693.500448	95.724801	1693.500448	102.939746	1693.500448	90.683157	1693.500448	179.366793	1693.500448	100.69984	1693.500448	74.425295	1693.500448	179.366793	1693.500448	176.558534
1695.429264	98.913978	1695.429264	95.828726	1695.429264	103.459295	1695.429264	90.837748	1695.429264	179.356457	1695.429264	100.561217	1695.429264	74.311853	1695.429264	179.356457	1695.429264	176.603714
1697.35808	98.921402	1697.35808	95.968072	1697.35808	103.837955	1697.35808	90.980077	1697.35808	179.356615	1697.35808	100.558118	1697.35808	74.365146	1697.35808	179.356615	1697.35808	176.685718
1699.286896	98.94357	1699.286896	96.198404	1699.286896	103.900496	1699.286896	90.963255	1699.286896	179.390252	1699.286896	100.664447	1699.286896	74.364054	1699.286896	179.390252	1699.286896	176.708042
1701.215712	98.96827	1701.215712	96.422441	1701.215712	103.724324	1701.215712	90.886157	1701.215712	179.417781	1701.215712	100.647521	1701.215712	74.408819	1701.215712	179.417781	1701.215712	176.699927
1703.144528	98.993959	1703.144528	96.38006	1703.144528	103.432846	1703.144528	90.869278	1703.144528	179.417708	1703.144528	100.633278	1703.144528	74.644964	1703.144528	179.417708	1703.144528	176.775442
1705.073344	99.034158	1705.073344	96.081937	1705.073344	103.323299	1705.073344	90.949832	1705.073344	179.494951	1705.073344	100.740607	1705.073344	74.80651	1705.073344	179.494951	1705.073344	176.87604
1707.00216	99.105064	1707.00216	95.770821	1707.00216	103.282859	1707.00216	90.977438	1707.00216	179.581093	1707.00216	100.917497	1707.00216	74.871844	1707.00216	179.581093	1707.00216	176.913283
1708.930976	99.17836	1708.930976	95.589276	1708.930976	102.937707	1708.930976	90.902043	1708.930976	179.614495	1708.930976	100.957577	1708.930976	74.652541	1708.930976	179.614495	1708.930976	176.98894
1710.859792	99.251509	1710.859792	95.508905	1710.859792	102.882628	1710.859792	90.83287	1710.859792	179.609218	1710.859792	101.004139	1710.859792	74.618365	1710.859792	179.609218	1710.859792	177.06398
1712.788608	99.319752	1712.788608	95.246482	1712.788608	103.038866	1712.788608	90.735244	1712.788608	179.703637	1712.788608	101.138954	1712.788608	74.837039	1712.788608	179.703637	1712.788608	177.096302
1714.717424	99.383011	1714.717424	95.324014	1714.717424	103.07748	1714.717424	90.687732	1714.717424	179.865099	1714.717424	101.187894	1714.717424	74.819011	1714.717424	179.865099	1714.717424	177.175945
1716.64624	99.436231	1716.64624	95.639469	1716.64624	103.029572	1716.64624	90.719951	1716.64624	179.934103	1716.64624	101.184726	1716.64624	74.870852	1716.64624	179.934103	1716.64624	177.195589
1718.575056	99.473359	1718.575056	95.755408	1718.575056	103.01686	1718.575056	90.686687	1718.575056	179.944893	1718.575056	101.101901	1718.575056	74.990974	1718.575056	179.944893	1718.575056	177.259675
1720.503872	99.477551	1720.503872	95.835018	1720.503872	103.149358	1720.503872	90.800339	1720.503872	179.932841	1720.503872	101.206911	1720.503872	75.058965	1720.503872	179.932841	1720.503872	177.379144
1722.432688	99.464702	1722.432688	95.978271	1722.432688	103.266825	1722.432688	91.036371	1722.432688	179.908622	1722.432688	101.276741	1722.432688	75.140598	1722.432688	179.908622	1722.432688	177.427421
1724.361504	99.458291	1724.361504	96.190001	1724.361504	103.474509	1724.361504	91.228292	1724.361504	179.947827	1724.361504	101.186927	1724.361504	75.073787	1724.361504	179.947827	1724.361504	177.408468
1726.29032	99.481227	1726.29032	96.366099	1726.29032	103.605448	1726.29032	91.375587	1726.29032	180.000502	1726.29032	101.14712	1726.29032	74.940106	1726.29032	180.000502	1726.29032	177.434863
1728.219136	99.512802	1728.219136	96.616411	1728.219136	103.68785	1728.219136	91.490674	1728.219136	179.988864	1728.219136	101.033322	1728.219136	75.032388	1728.219136	179.988864	1728.219136	177.500551
1730.147952	99.516807	1730.147952	96.825983	1730.147952	103.81346	1730.147952	91.551813	1730.147952	180.094123	1730.147952	100.920973	1730.147952	74.992128	1730.147952	180.094123	1730.147952	177.568869
1732.076768	99.55278	1732.076768	96.861137	1732.076768	103.973285	1732.076768	91.520803	1732.076768	180.155639	1732.076768	100.962853	1732.076768	74.941808	1732.076768	180.155639	1732.076768	177.581341
1734.005584	99.585897	1734.005584	96.902378	1734.005584	104.067063	1734.005584	91.440519	1734.005584	180.187993	1734.005584	100.992503	1734.005584	74.996254	1734.005584	180.187993	1734.005584	177.509215
1735.9344	99.597239	1735.9344	96.858886	1735.9344	103.995231	1735.9344	91.265248	1735.9344	180.211142	1735.9344	101.043228	1735.9344	75.033056	1735.9344	180.211142	1735.9344	177.471687
1737.863216	99.608209	1737.863216	96.61615	1737.863216	103.92159	1737.863216	91.098589	1737.863216	180.195357	1737.863216	101.262122	1737.863216	74.996041	1737.863216	180.195357	1737.863216	177.459006
1739.792032	99.613909	1739.792032	96.305239	1739.792032	103.815122	1739.792032	91.010155	1739.792032	180.203442	1739.792032	101.313226	1739.792032	74.960484	1739.792032	180.203442	1739.792032	177.408352
1741.720848	99.630203	1741.720848	96.055726	1741.720848	103.503461	1741.720848	90.92845	1741.720848	180.184222	1741.720848	101.333369	1741.720848	74.861066	1741.720848	180.184222	1741.720848	177.373258
1743.649664	99.66208	1743.649664	95.910009	1743.649664	103.193301	1743.649664	90.848961	1743.649664	180.244774	1743.649664	101.371258	1743.649664	74.766394	1743.649664	180.244774	1743.649664	177.422172
1745.57848	99.704372	1745.57848	95.696458	1745.57848	102.972548	1745.57848	90.792666	1745.57848	180.315316	1745.57848	101.348888	1745.57848	74.897895	1745.57848	180.315316	1745.57848	177.46715
1747.507296	99.738674	1747.507296	95.540376	1747.507296	102.970484	1747.507296	90.802637	1747.507296	180.358397	1747.507296	101.326302	1747.507296	74.902485	1747.507296	180.358397	1747.507296	177.55531
1749.436112	99.771567	1749.436112	95.526349	1749.436112	103.056479	1749.436112	90.853004	1749.436112	180.373335	1749.436112	101.332372	1749.436112	74.911233	1749.436112	180.373335	1749.436112	177.602427
1751.364928	99.798948	1751.364928	95.613259	1751.364928	103.250953	1751.364928	90.83953	1751.364928	180.40336	1751.364928	101.357875	1751.364928	75.020407	1751.364928	180.40336	1751.364928	177.584758
1753.293744	99.824873	1753.293744	95.771895	1753.293744	103.553473	1753.293744	90.887193	1753.293744	180.425492	1753.293744	101.368338	1753.293744	75.173805	1753.293744	180.425492	1753.293744	177.637905
1755.22256	99.840955	1755.22256	96.088909	1755.22256	103.790718	1755.22256	91.041669	1755.22256	180.435719	1755.22256	101.430371	1755.22256	75.267292	1755.22256	180.435719	1755.22256	177.713142
1757.151376	99.848072	1757.151376	96.407287	1757.151376	104.012129	1757.151376	91.246447	1757.151376	180.481333	1757.151376	101.454687	1757.151376	75.27838	1757.151376	180.481333	1757.151376	177.793965
1759.080192	99.860929	1759.080192	96.649726	1759.080192	104.1638	1759.080192	91.42367	1759.080192	180.529793	1759.080192	101.481685	1759.080192	75.214397	1759.080192	180.529793	1759.080192	177.923469
1761.009008	99.879592	1761.009008	96.893352	1761.009008	104.140501	1761.009008	91.654079	1761.009008	180.544877	1761.009008	101.481709	1761.009008	75.30808	1761.009008	180.544877	1761.009008	178.00927
1762.937824	99.890491	1762.937824	97.0305	1762.937824	104.179213	1762.937824	91.829841	1762.937824	180.624001	1762.937824	101.463002	1762.937824	75.528057	1762.937824	180.624001	1762.937824	178.027049
1764.86664	99.925067	1764.86664	97.025786	1764.86664	104.264996	1764.86664	91.892777	1764.86664	180.731123	1764.86664	101.529713	1764.86664	75.6884	1764.86664	180.731123	1764.86664	177.9909
1766.795456	99.963703	1766.795456	97.019095	1766.795456	104.323102	1766.795456	91.918835	1766.795456	180.813958	1766.795456	101.591422	1766.795456	75.857797	1766.795456	180.813958	1766.795456	177.942126
1768.724272	100.011765	1768.724272	97.004592	1768.724272	104.205701	1768.724272	91.881941	1768.724272	180.893543	1768.724272	101.600381	1768.724272	75.94621	1768.724272	180.893543	1768.724272	177.919486
1770.653088	100.078995	1770.653088	97.010007	1770.653088	104.100493	1770.653088	91.807981	1770.653088	180.979803	1770.653088	101.705616	1770.653088	76.033163	1770.653088	180.979803	1770.653088	177.932723
1772.581904	100.136473	1772.581904	96.952347	1772.581904	103.996103	1772.581904	91.767037	1772.581904	181.063966	1772.581904	101.766661	1772.581904	76.041622	1772.581904	181.063966	1772.581904	177.932484
1774.51072	100.172004	1774.51072	96.88684	1774.51072	103.873111	1774.51072	91.771857	1774.51072	181.077296	1774.51072	101.797654	1774.51072	75.956497	1774.51072	181.077296	1774.51072	177.940126
1776.439536	100.185422	1776.439536	96.869286	1776.439536	103.779059	1776.439536	91.8345	1776.439536	181.065194	1776.439536	101.905526	1776.439536	75.838455	1776.439536	181.065194	1776.439536	177.96288
1778.368352	100.185093	1778.368352	96.881649	1778.368352	103.721378	1778.368352	91.806217	1778.368352	181.040551	1778.368352	101.960587	1778.368352	75.826939	1778.368352	181.040551	1778.368352	177.99781
1780.297168	100.175287	1780.297168	96.902198	1780.297168	103.736747	1780.297168	91.756716	1780.297168	180.997059	1780.297168	102.007317	1780.297168	75.843937	1780.297168	180.997059	1780.297168	178.064758
1782.225984	100.149671	1782.225984	96.958592	1782.225984	103.951014	1782.225984	91.772798	1782.225984	180.972715	1782.225984	102.006216	1782.225984	75.846829	1782.225984	180.972715	1782.225984	178.110377
1784.1548	100.125781	1784.1548	96.899115	1784.1548	104.153192	1784.1548	91.774843	1784.1548	180.959621	1784.1548	102.012898	1784.1548	75.87772	1784.1548	180.959621	1784.1548	178.139361
1786.083616	100.132151	1786.083616	96.873543	1786.083616	104.284573	1786.083616	91.767456	1786.083616	180.958195	1786.083616	102.011167	1786.083616	75.863567	1786.083616	180.958195	1786.083616	178.197441
1788.012432	100.157908	1788.012432	96.918838	1788.012432	104.278497	1788.012432	91.770885	1788.012432	180.938843	1788.012432	102.017992	1788.012432	75.835752	1788.012432	180.938843	1788.012432	178.192053
1789.941248	100.18636	1789.941248	96.883007	1789.941248	104.288328	1789.941248	91.764529	1789.941248	180.930846	1789.941248	101.995385	1789.941248	75.903494	1789.941248	180.930846	1789.941248	178.138566
1791.870064	100.224924	1791.870064	96.806677	1791.870064	104.293531	1791.870064	91.830034	1791.870064	180.950304	1791.870064	101.978253	1791.870064	75.950079	1791.870064	180.950304	1791.870064	178.093034
1793.79888	100.266833	1793.79888	96.791883	1793.79888	104.212608	1793.79888	91.911813	1793.79888	180.951553	1793.79888	102.096086	1793.79888	75.969704	1793.79888	180.951553	1793.79888	178.084095
1795.727696	100.292217	1795.727696	96.784256	1795.727696	104.116378	1795.727696	91.93246	1795.727696	180.978757	1795.727696	102.132601	1795.727696	75.978403	1795.727696	180.978757	1795.727696	178.07743
1797.656512	100.310622	1797.656512	96.839544	1797.656512	104.091383	1797.656512	91.939227	1797.656512	181.035164	1797.656512	102.16495	1797.656512	75.984364	1797.656512	181.035164	1797.656512	178.082697
1799.585328	100.325098	1799.585328	96.890705	1799.585328	104.172522	1799.585328	91.955449	1799.585328	181.082431	1799.585328	102.228396	1799.585328	76.087581	1799.585328	181.082431	1799.585328	178.099442
1801.514144	100.32794	1801.514144	96.930939	1801.514144	104.327286	1801.514144	91.961504	1801.514144	181.20691	1801.514144	102.245403	1801.514144	76.207882	1801.514144	181.20691	1801.514144	178.099638
1803.44296	100.341884	1803.44296	97.054542	1803.44296	104.429991	1803.44296	92.009915	1803.44296	181.284661	1803.44296	102.283657	1803.44296	76.313484	1803.44296	181.284661	1803.44296	178.14227
1805.371776	100.368403	1805.371776	97.199906	1805.371776	104.486242	1805.371776	92.069197	1805.371776	181.311342	1805.371776	102.325734	1805.371776	76.306588	1805.371776	181.311342	1805.371776	178.215291
1807.300592	100.40472	1807.300592	97.349182	1807.300592	104.515125	1807.300592	92.133918	1807.300592	181.347565	1807.300592	102.424955	1807.300592	76.329449	1807.300592	181.347565	1807.300592	178.245894
1809.229408	100.445199	1809.229408	97.50622	1809.229408	104.581173	1809.229408	92.236318	1809.229408	181.406277	1809.229408	102.641768	1809.229408	76.406891	1809.229408	181.406277	1809.229408	178.240222
1811.158224	100.499072	1811.158224	97.586983	1811.158224	104.669836	1811.158224	92.356841	1811.158224	181.441497	1811.158224	102.740822	1811.158224	76.498004	1811.158224	181.441497	1811.158224	178.280869
1813.08704	100.56496	1813.08704	97.691882	1813.08704	104.684149	1813.08704	92.466603	1813.08704	181.466061	1813.08704	102.769858	1813.08704	76.617965	1813.08704	181.466061	1813.08704	178.333944
1815.015856	100.633855	1815.015856	97.815692	1815.015856	104.75683	1815.015856	92.560018	1815.015856	181.522166	1815.015856	102.783637	1815.015856	76.718655	1815.015856	181.522166	1815.015856	178.360498
1816.944672	100.68469	1816.944672	97.880228	1816.944672	104.856945	1816.944672	92.599423	1816.944672	181.609108	1816.944672	102.829386	1816.944672	76.780753	1816.944672	181.609108	1816.944672	178.371543
1818.873488	100.70391	1818.873488	97.911329	1818.873488	104.932248	1818.873488	92.660149	1818.873488	181.700241	1818.873488	102.852432	1818.873488	76.805495	1818.873488	181.700241	1818.873488	178.340824
1820.802304	100.707311	1820.802304	97.963563	1820.802304	105.039178	1820.802304	92.71345	1820.802304	181.771597	1820.802304	102.89152	1820.802304	76.859497	1820.802304	181.771597	1820.802304	178.298055
1822.73112	100.714672	1822.73112	97.999914	1822.73112	105.044941	1822.73112	92.717209	1822.73112	181.80806	1822.73112	102.959362	1822.73112	76.869974	1822.73112	181.80806	1822.73112	178.277902
1824.659936	100.719645	1824.659936	98.010302	1824.659936	105.010136	1824.659936	92.734545	1824.659936	181.825747	1824.659936	103.015214	1824.659936	76.841726	1824.659936	181.825747	1824.659936	178.273326
1826.588752	100.737403	1826.588752	97.941411	1826.588752	105.008231	1826.588752	92.792091	1826.588752	181.830814	1826.588752	103.089346	1826.588752	76.799601	1826.588752	181.830814	1826.588752	178.250879
1828.517568	100.758562	1828.517568	97.880423	1828.517568	104.973187	1828.517568	92.824896	1828.517568	181.863616	1828.517568	103.186024	1828.517568	76.779064	1828.517568	181.863616	1828.517568	178.224557
1830.446384	100.793813	1830.446384	97.89883	1830.446384	104.914034	1830.446384	92.785457	1830.446384	181.908456	1830.446384	103.243528	1830.446384	76.802776	1830.446384	181.908456	1830.446384	178.265852
1832.3752	100.83163	1832.3752	97.955264	1832.3752	104.901721	1832.3752	92.701236	1832.3752	181.923743	1832.3752	103.305856	1832.3752	76.845557	1832.3752	181.923743	1832.3752	178.301994
1834.304016	100.853873	1834.304016	98.003081	1834.304016	104.96774	1834.304016	92.641312	1834.304016	181.9463	1834.304016	103.346257	1834.304016	76.864516	1834.304016	181.9463	1834.304016	178.298061
1836.232832	100.886198	1836.232832	97.987985	1836.232832	105.035917	1836.232832	92.626293	1836.232832	181.983804	1836.232832	103.376304	1836.232832	76.860779	1836.232832	181.983804	1836.232832	178.292182
1838.161648	100.925722	1838.161648	97.9474	1838.161648	105.073983	1838.161648	92.629634	1838.161648	182.028699	1838.161648	103.409867	1838.161648	76.879235	1838.161648	182.028699	1838.161648	178.305488
1840.090464	100.929536	1840.090464	97.926852	1840.090464	105.0695	1840.090464	92.651715	1840.090464	182.089857	1840.090464	103.387292	1840.090464	76.966884	1840.090464	182.089857	1840.090464	178.313305
1842.01928	100.910454	1842.01928	97.941011	1842.01928	104.991849	1842.01928	92.679687	1842.01928	182.109529	1842.01928	103.381325	1842.01928	77.075117	1842.01928	182.109529	1842.01928	178.32311
1843.948096	100.885245	1843.948096	98.003757	1843.948096	104.956738	1843.948096	92.69602	1843.948096	182.10386	1843.948096	103.394295	1843.948096	77.113731	1843.948096	182.10386	1843.948096	178.355602
1845.876912	100.871357	1845.876912	98.058243	1845.876912	104.973746	1845.876912	92.73388	1845.876912	182.11528	1845.876912	103.407505	1845.876912	77.114339	1845.876912	182.11528	1845.876912	178.338949
1847.805728	100.87821	1847.805728	98.11912	1847.805728	105.049423	1847.805728	92.808882	1847.805728	182.125981	1847.805728	103.431668	1847.805728	77.12003	1847.805728	182.125981	1847.805728	178.327904
1849.734544	100.891277	1849.734544	98.175348	1849.734544	105.139658	1849.734544	92.892303	1849.734544	182.147549	1849.734544	103.412756	1849.734544	77.090081	1849.734544	182.147549	1849.734544	178.344787
1851.66336	100.911088	1851.66336	98.232238	1851.66336	105.265556	1851.66336	92.904009	1851.66336	182.174436	1851.66336	103.395968	1851.66336	77.087306	1851.66336	182.174436	1851.66336	178.36908
1853.592176	100.93878	1853.592176	98.333907	1853.592176	105.395714	1853.592176	92.879639	1853.592176	182.206534	1853.592176	103.472694	1853.592176	77.085614	1853.592176	182.206534	1853.592176	178.408717
1855.520992	100.959551	1855.520992	98.455423	1855.520992	105.509717	1855.520992	92.858309	1855.520992	182.237275	1855.520992	103.501489	1855.520992	77.046466	1855.520992	182.237275	1855.520992	178.495894
1857.449808	100.969018	1857.449808	98.463802	1857.449808	105.589481	1857.449808	92.837086	1857.449808	182.266366	1857.449808	103.527853	1857.449808	77.090343	1857.449808	182.266366	1857.449808	178.574208
1859.378624	100.97654	1859.378624	98.386852	1859.378624	105.580503	1859.378624	92.826803	1859.378624	182.314247	1859.378624	103.580287	1859.378624	77.156805	1859.378624	182.314247	1859.378624	178.562766
1861.30744	100.958538	1861.30744	98.222976	1861.30744	105.419762	1861.30744	92.845613	1861.30744	182.34776	1861.30744	103.635412	1861.30744	77.219939	1861.30744	182.34776	1861.30744	178.504726
1863.236256	100.927534	1863.236256	98.038052	1863.236256	105.212211	1863.236256	92.86893	1863.236256	182.367574	1863.236256	103.66332	1863.236256	77.284101	1863.236256	182.367574	1863.236256	178.459822
1865.165072	100.906451	1865.165072	97.911084	1865.165072	105.054609	1865.165072	92.900237	1865.165072	182.404894	1865.165072	103.696051	1865.165072	77.325817	1865.165072	182.404894	1865.165072	178.432343
1867.093888	100.888245	1867.093888	97.853652	1867.093888	105.012073	1867.093888	92.884561	1867.093888	182.444217	1867.093888	103.760513	1867.093888	77.361027	1867.093888	182.444217	1867.093888	178.427986
1869.022704	100.880853	1869.022704	97.849016	1869.022704	105.018565	1869.022704	92.855723	1869.022704	182.461739	1869.022704	103.753396	1869.022704	77.346599	1869.022704	182.461739	1869.022704	178.438067
1870.95152	100.889999	1870.95152	97.925408	1870.95152	105.043187	1870.95152	92.883937	1870.95152	182.482667	1870.95152	103.764296	1870.95152	77.348487	1870.95152	182.482667	1870.95152	178.46013
1872.880336	100.918564	1872.880336	98.024234	1872.880336	105.092434	1872.880336	92.922742	1872.880336	182.529903	1872.880336	103.824261	1872.880336	77.353203	1872.880336	182.529903	1872.880336	178.472136
1874.809152	100.958444	1874.809152	98.141938	1874.809152	105.24015	1874.809152	92.990369	1874.809152	182.569163	1874.809152	103.865796	1874.809152	77.341913	1874.809152	182.569163	1874.809152	178.485564
1876.737968	100.991904	1876.737968	98.302312	1876.737968	105.440911	1876.737968	93.082765	1876.737968	182.569268	1876.737968	103.875174	1876.737968	77.366281	1876.737968	182.569268	1876.737968	178.524272
1878.666784	101.004989	1878.666784	98.468577	1878.666784	105.592814	1878.666784	93.147483	1878.666784	182.569531	1878.666784	103.892183	1878.666784	77.41169	1878.666784	182.569531	1878.666784	178.554198
1880.5956	100.992653	1880.5956	98.652275	1880.5956	105.6225	1880.5956	93.19992	1880.5956	182.593853	1880.5956	103.975348	1880.5956	77.482638	1880.5956	182.593853	1880.5956	178.604435
1882.524416	100.970629	1882.524416	98.738393	1882.524416	105.584234	1882.524416	93.258669	1882.524416	182.622795	1882.524416	104.037961	1882.524416	77.580977	1882.524416	182.622795	1882.524416	178.665264
1884.453232	100.950339	1884.453232	98.654459	1884.453232	105.60284	1884.453232	93.339637	1884.453232	182.64294	1884.453232	104.01793	1884.453232	77.64692	1884.453232	182.64294	1884.453232	178.656417
1886.382048	100.938721	1886.382048	98.57004	1886.382048	105.652108	1886.382048	93.426392	1886.382048	182.663291	1886.382048	104.037977	1886.382048	77.670739	1886.382048	182.663291	1886.382048	178.621391
1888.310864	100.945661	1888.310864	98.535149	1888.310864	105.64428	1888.310864	93.478595	1888.310864	182.687304	1888.310864	104.052919	1888.310864	77.707869	1888.310864	182.687304	1888.310864	178.601885
1890.23968	100.974224	1890.23968	98.529382	1890.23968	105.628436	1890.23968	93.45727	1890.23968	182.719834	1890.23968	104.072372	1890.23968	77.775434	1890.23968	182.719834	1890.23968	178.592701
1892.168496	101.028562	1892.168496	98.529479	1892.168496	105.631776	1892.168496	93.411469	1892.168496	182.752154	1892.168496	104.094133	1892.168496	77.774227	1892.168496	182.752154	1892.168496	178.597822
1894.097312	101.079953	1894.097312	98.545821	1894.097312	105.652213	1894.097312	93.382993	1894.097312	182.802569	1894.097312	104.123518	1894.097312	77.670788	1894.097312	182.802569	1894.097312	178.616975
1896.026128	101.134032	1896.026128	98.566765	1896.026128	105.658887	1896.026128	93.37054	1896.026128	182.82318	1896.026128	104.144361	1896.026128	77.650703	1896.026128	182.82318	1896.026128	178.648711
1897.954944	101.180387	1897.954944	98.529206	1897.954944	105.704697	1897.954944	93.372719	1897.954944	182.812684	1897.954944	104.152275	1897.954944	77.650369	1897.954944	182.812684	1897.954944	178.668172
1899.88376	101.196373	1899.88376	98.455221	1899.88376	105.768991	1899.88376	93.3771	1899.88376	182.770639	1899.88376	104.152759	1899.88376	77.597316	1899.88376	182.770639	1899.88376	178.662523
1901.812576	101.17727	1901.812576	98.418954	1901.812576	105.730649	1901.812576	93.398651	1901.812576	182.738146	1901.812576	104.173996	1901.812576	77.555951	1901.812576	182.738146	1901.812576	178.657843
1903.741392	101.154716	1903.741392	98.436967	1903.741392	105.704998	1903.741392	93.455196	1903.741392	182.729183	1903.741392	104.220089	1903.741392	77.531905	1903.741392	182.729183	1903.741392	178.674324
1905.670208	101.137857	1905.670208	98.477169	1905.670208	105.680444	1905.670208	93.453603	1905.670208	182.732711	1905.670208	104.306555	1905.670208	77.517666	1905.670208	182.732711	1905.670208	178.680935
1907.599024	101.129946	1907.599024	98.569107	1907.599024	105.670872	1907.599024	93.444081	1907.599024	182.741008	1907.599024	104.316503	1907.599024	77.520975	1907.599024	182.741008	1907.599024	178.686683
1909.52784	101.140885	1909.52784	98.680767	1909.52784	105.732042	1909.52784	93.4364	1909.52784	182.75325	1909.52784	104.291573	1909.52784	77.528977	1909.52784	182.75325	1909.52784	178.712299
1911.456656	101.186637	1911.456656	98.663075	1911.456656	105.809524	1911.456656	93.423633	1911.456656	182.774366	1911.456656	104.291342	1911.456656	77.542675	1911.456656	182.774366	1911.456656	178.700649
1913.385472	101.246606	1913.385472	98.649654	1913.385472	105.91686	1913.385472	93.440544	1913.385472	182.826295	1913.385472	104.296206	1913.385472	77.559392	1913.385472	182.826295	1913.385472	178.667334
1915.314288	101.307946	1915.314288	98.671231	1915.314288	105.913102	1915.314288	93.440327	1915.314288	182.862839	1915.314288	104.304011	1915.314288	77.587061	1915.314288	182.862839	1915.314288	178.638936
1917.243104	101.362097	1917.243104	98.711121	1917.243104	105.872564	1917.243104	93.423958	1917.243104	182.881482	1917.243104	104.317236	1917.243104	77.636916	1917.243104	182.881482	1917.243104	178.629778
1919.17192	101.404151	1919.17192	98.770253	1919.17192	105.821416	1919.17192	93.432272	1919.17192	182.888881	1919.17192	104.343841	1919.17192	77.652002	1919.17192	182.888881	1919.17192	178.643394
1921.100736	101.423142	1921.100736	98.819503	1921.100736	105.725109	1921.100736	93.468565	1921.100736	182.879986	1921.100736	104.372003	1921.100736	77.647144	1921.100736	182.879986	1921.100736	178.673074
1923.029552	101.420508	1923.029552	98.813074	1923.029552	105.651363	1923.029552	93.536723	1923.029552	182.894432	1923.029552	104.394791	1923.029552	77.65004	1923.029552	182.894432	1923.029552	178.704018
1924.958368	101.414475	1924.958368	98.752403	1924.958368	105.629026	1924.958368	93.577889	1924.958368	182.916316	1924.958368	104.441939	1924.958368	77.673628	1924.958368	182.916316	1924.958368	178.71946
1926.887184	101.399026	1926.887184	98.740601	1926.887184	105.681309	1926.887184	93.597164	1926.887184	182.92616	1926.887184	104.49285	1926.887184	77.711295	1926.887184	182.92616	1926.887184	178.726358
1928.816	101.385785	1928.816	98.824902	1928.816	105.792643	1928.816	93.583918	1928.816	182.936755	1928.816	104.494252	1928.816	77.76231	1928.816	182.936755	1928.816	178.760745
1930.744816	101.39499	1930.744816	98.908885	1930.744816	105.916037	1930.744816	93.550405	1930.744816	182.963235	1930.744816	104.547472	1930.744816	77.816689	1930.744816	182.963235	1930.744816	178.803372
1932.673632	101.427976	1932.673632	98.968583	1932.673632	106.078766	1932.673632	93.538221	1932.673632	183.001348	1932.673632	104.581099	1932.673632	77.861001	1932.673632	183.001348	1932.673632	178.827779
1934.602448	101.478677	1934.602448	99.005447	1934.602448	106.078615	1934.602448	93.556459	1934.602448	183.039478	1934.602448	104.570796	1934.602448	77.870267	1934.602448	183.039478	1934.602448	178.835191
1936.531264	101.536686	1936.531264	99.020958	1936.531264	106.045863	1936.531264	93.598922	1936.531264	183.088974	1936.531264	104.578415	1936.531264	77.891482	1936.531264	183.088974	1936.531264	178.852224
1938.46008	101.577435	1938.46008	98.950588	1938.46008	106.037802	1938.46008	93.638764	1938.46008	183.142172	1938.46008	104.601251	1938.46008	77.952095	1938.46008	183.142172	1938.46008	178.837916
1940.388896	101.588224	1940.388896	98.940168	1940.388896	106.02722	1940.388896	93.674559	1940.388896	183.15878	1940.388896	104.630561	1940.388896	78.036887	1940.388896	183.15878	1940.388896	178.811572
1942.317712	101.577194	1942.317712	98.968033	1942.317712	106.026626	1942.317712	93.688961	1942.317712	183.169203	1942.317712	104.666126	1942.317712	78.062768	1942.317712	183.169203	1942.317712	178.796147
1944.246528	101.566615	1944.246528	98.989019	1944.246528	106.052824	1944.246528	93.650819	1944.246528	183.196059	1944.246528	104.7061	1944.246528	78.059804	1944.246528	183.196059	1944.246528	178.790274
1946.175344	101.563698	1946.175344	99.017238	1946.175344	106.08846	1946.175344	93.664345	1946.175344	183.235332	1946.175344	104.738978	1946.175344	78.079499	1946.175344	183.235332	1946.175344	178.79883
1948.10416	101.573518	1948.10416	99.048937	1948.10416	106.130373	1948.10416	93.70898	1948.10416	183.274681	1948.10416	104.742611	1948.10416	78.036355	1948.10416	183.274681	1948.10416	178.821014
1950.032976	101.592269	1950.032976	99.084146	1950.032976	106.177551	1950.032976	93.70912	1950.032976	183.302429	1950.032976	104.753153	1950.032976	77.993689	1950.032976	183.302429	1950.032976	178.845112
1951.961792	101.618644	1951.961792	99.178762	1951.961792	106.251978	1951.961792	93.685671	1951.961792	183.322727	1951.961792	104.788053	1951.961792	78.002833	1951.961792	183.322727	1951.961792	178.867279
1953.890608	101.649905	1953.890608	99.296166	1953.890608	106.260894	1953.890608	93.673406	1953.890608	183.315649	1953.890608	104.8492	1953.890608	78.023155	1953.890608	183.315649	1953.890608	178.895433
1955.819424	101.668377	1955.819424	99.337419	1955.819424	106.260482	1955.819424	93.680193	1955.819424	183.328911	1955.819424	104.934404	1955.819424	78.050151	1955.819424	183.328911	1955.819424	178.914832
1957.74824	101.69315	1957.74824	99.268382	1957.74824	106.266384	1957.74824	93.702559	1957.74824	183.369922	1957.74824	104.970499	1957.74824	78.079897	1957.74824	183.369922	1957.74824	178.902594
1959.677056	101.71564	1959.677056	99.197293	1959.677056	106.198973	1959.677056	93.739453	1959.677056	183.418342	1959.677056	104.995414	1959.677056	78.117202	1959.677056	183.418342	1959.677056	178.893038
1961.605872	101.726265	1961.605872	99.152062	1961.605872	106.141712	1961.605872	93.77536	1961.605872	183.462401	1961.605872	104.976588	1961.605872	78.176989	1961.605872	183.462401	1961.605872	178.903168
1963.534688	101.716295	1963.534688	99.136149	1963.534688	106.13807	1963.534688	93.778104	1963.534688	183.518054	1963.534688	104.966296	1963.534688	78.246502	1963.534688	183.518054	1963.534688	178.913504
1965.463504	101.695916	1965.463504	99.145106	1965.463504	106.136181	1965.463504	93.783208	1965.463504	183.556826	1965.463504	104.972292	1965.463504	78.310245	1965.463504	183.556826	1965.463504	178.917774
1967.39232	101.677564	1967.39232	99.166476	1967.39232	106.137442	1967.39232	93.799108	1967.39232	183.581339	1967.39232	104.985059	1967.39232	78.30849	1967.39232	183.581339	1967.39232	178.914864
1969.321136	101.67264	1969.321136	99.189955	1969.321136	106.16072	1969.321136	93.831604	1969.321136	183.603198	1969.321136	105.004809	1969.321136	78.267694	1969.321136	183.603198	1969.321136	178.912396
1971.249952	101.683016	1971.249952	99.210122	1971.249952	106.218189	1971.249952	93.872039	1971.249952	183.624294	1971.249952	105.030898	1971.249952	78.244317	1971.249952	183.624294	1971.249952	178.920461
1973.178768	101.703874	1973.178768	99.266957	1973.178768	106.293639	1973.178768	93.929654	1973.178768	183.61615	1973.178768	105.05985	1973.178768	78.226456	1973.178768	183.61615	1973.178768	178.950172
1975.107584	101.722348	1975.107584	99.341408	1975.107584	106.37092	1975.107584	93.926917	1975.107584	183.607626	1975.107584	105.093644	1975.107584	78.222938	1975.107584	183.607626	1975.107584	178.984228
1977.0364	101.748557	1977.0364	99.406028	1977.0364	106.427055	1977.0364	93.889799	1977.0364	183.61349	1977.0364	105.131438	1977.0364	78.222691	1977.0364	183.61349	1977.0364	179.006481
1978.965216	101.780609	1978.965216	99.486391	1978.965216	106.408854	1978.965216	93.876814	1978.965216	183.629309	1978.965216	105.198539	1978.965216	78.227352	1978.965216	183.629309	1978.965216	179.027585
1980.894032	101.810682	1980.894032	99.448325	1980.894032	106.397186	1980.894032	93.871329	1980.894032	183.648018	1980.894032	105.235919	1980.894032	78.235832	1980.894032	183.648018	1980.894032	179.027931
1982.822848	101.829643	1982.822848	99.316995	1982.822848	106.402316	1982.822848	93.868769	1982.822848	183.6629	1982.822848	105.22801	1982.822848	78.253404	1982.822848	183.6629	1982.822848	178.994239
1984.751664	101.846012	1984.751664	99.232038	1984.751664	106.319007	1984.751664	93.880687	1984.751664	183.673902	1984.751664	105.21641	1984.751664	78.273092	1984.751664	183.673902	1984.751664	178.967106
1986.68048	101.849672	1986.68048	99.195563	1986.68048	106.234134	1986.68048	93.873348	1986.68048	183.703735	1986.68048	105.212865	1986.68048	78.293584	1986.68048	183.703735	1986.68048	178.963655
1988.609296	101.826781	1988.609296	99.176144	1988.609296	106.199362	1988.609296	93.844985	1988.609296	183.755039	1988.609296	105.220917	1988.609296	78.324964	1988.609296	183.755039	1988.609296	178.972042
1990.538112	101.799602	1990.538112	99.181303	1990.538112	106.202515	1990.538112	93.842644	1990.538112	183.780441	1990.538112	105.236069	1990.538112	78.373578	1990.538112	183.780441	1990.538112	178.979975
1992.466928	101.779479	1992.466928	99.214751	1992.466928	106.226595	1992.466928	93.857011	1992.466928	183.784815	1992.466928	105.252056	1992.466928	78.379123	1992.466928	183.784815	1992.466928	178.982109
1994.395744	101.76732	1994.395744	99.278535	1994.395744	106.292245	1994.395744	93.879162	1994.395744	183.792377	1994.395744	105.26384	1994.395744	78.353085	1994.395744	183.792377	1994.395744	178.97905
1996.32456	101.77101	1996.32456	99.350237	1996.32456	106.421552	1996.32456	93.94296	1996.32456	183.790127	1996.32456	105.283266	1996.32456	78.338049	1996.32456	183.790127	1996.32456	178.979779
1998.253376	101.781122	1998.253376	99.431505	1998.253376	106.569615	1998.253376	94.030584	1998.253376	183.766422	1998.253376	105.298304	1998.253376	78.332995	1998.253376	183.766422	1998.253376	178.993992
2000.182192	101.793618	2000.182192	99.524393	2000.182192	106.680284	2000.182192	94.068514	2000.182192	183.753622	2000.182192	105.307806	2000.182192	78.329726	2000.182192	183.753622	2000.182192	179.021711
2002.111008	101.819214	2002.111008	99.644772	2002.111008	106.732186	2002.111008	94.075734	2002.111008	183.751547	2002.111008	105.327304	2002.111008	78.330368	2002.111008	183.751547	2002.111008	179.053591
2004.039824	101.84644	2004.039824	99.726215	2004.039824	106.704016	2004.039824	94.082257	2004.039824	183.751397	2004.039824	105.35853	2004.039824	78.340109	2004.039824	183.751397	2004.039824	179.083493
2005.96864	101.866839	2005.96864	99.665804	2005.96864	106.736471	2005.96864	94.095847	2005.96864	183.757776	2005.96864	105.362677	2005.96864	78.358632	2005.96864	183.757776	2005.96864	179.09605
2007.897456	101.878137	2007.897456	99.489386	2007.897456	106.752922	2007.897456	94.105747	2007.897456	183.770012	2007.897456	105.36917	2007.897456	78.380214	2007.897456	183.770012	2007.897456	179.078035
2009.826272	101.8851	2009.826272	99.342983	2009.826272	106.618527	2009.826272	94.102045	2009.826272	183.789878	2009.826272	105.388976	2009.826272	78.413951	2009.826272	183.789878	2009.826272	179.059414
2011.755088	101.889792	2011.755088	99.250378	2011.755088	106.436544	2011.755088	94.088881	2011.755088	183.825408	2011.755088	105.407751	2011.755088	78.449141	2011.755088	183.825408	2011.755088	179.055606
2013.683904	101.893639	2013.683904	99.188568	2013.683904	106.321111	2013.683904	94.041669	2013.683904	183.85996	2013.683904	105.419887	2013.683904	78.4808	2013.683904	183.85996	2013.683904	179.063657
2015.61272	101.905431	2015.61272	99.167886	2015.61272	106.263532	2015.61272	94.027523	2015.61272	183.884729	2015.61272	105.429033	2015.61272	78.502845	2015.61272	183.884729	2015.61272	179.077876
2017.541536	101.926345	2017.541536	99.197722	2017.541536	106.23535	2017.541536	94.03885	2017.541536	183.898833	2017.541536	105.442994	2017.541536	78.488192	2017.541536	183.898833	2017.541536	179.088008
2019.470352	101.950984	2019.470352	99.268409	2019.470352	106.246158	2019.470352	94.053936	2019.470352	183.90516	2019.470352	105.466272	2019.470352	78.468488	2019.470352	183.90516	2019.470352	179.087135
2021.399168	101.974146	2021.399168	99.368412	2021.399168	106.322774	2021.399168	94.097637	2021.399168	183.912197	2021.399168	105.499051	2021.399168	78.468066	2021.399168	183.912197	2021.399168	179.076723
2023.327984	101.991266	2023.327984	99.475364	2023.327984	106.482409	2023.327984	94.140369	2023.327984	183.90191	2023.327984	105.541167	2023.327984	78.47171	2023.327984	183.90191	2023.327984	179.070161
2025.2568	101.990365	2025.2568	99.611911	2025.2568	106.692353	2025.2568	94.164202	2025.2568	183.902398	2025.2568	105.578445	2025.2568	78.483081	2025.2568	183.902398	2025.2568	179.077644
2027.185616	101.987414	2027.185616	99.785234	2027.185616	106.814061	2027.185616	94.188282	2027.185616	183.918193	2027.185616	105.618202	2027.185616	78.500267	2027.185616	183.918193	2027.185616	179.101132
2029.114432	101.984414	2029.114432	99.936306	2029.114432	106.83561	2029.114432	94.205551	2029.114432	183.943726	2029.114432	105.660862	2029.114432	78.52421	2029.114432	183.943726	2029.114432	179.129531
2031.043248	101.980901	2031.043248	99.961184	2031.043248	106.886091	2031.043248	94.239437	2031.043248	183.977931	2031.043248	105.648465	2031.043248	78.549211	2031.043248	183.977931	2031.043248	179.145247
2032.972064	101.993222	2032.972064	99.873772	2032.972064	106.901923	2032.972064	94.291328	2032.972064	184.012701	2032.972064	105.641023	2032.972064	78.57851	2032.972064	184.012701	2032.972064	179.140568
2034.90088	102.024866	2034.90088	99.797303	2034.90088	106.838456	2034.90088	94.348699	2034.90088	184.053754	2034.90088	105.65554	2034.90088	78.612106	2034.90088	184.053754	2034.90088	179.13413
2036.829696	102.06585	2036.829696	99.755227	2036.829696	106.756512	2036.829696	94.363876	2036.829696	184.095846	2036.829696	105.673128	2036.829696	78.657679	2036.829696	184.095846	2036.829696	179.134894
2038.758512	102.11869	2038.758512	99.726187	2038.758512	106.71318	2038.758512	94.329391	2038.758512	184.124736	2038.758512	105.693826	2038.758512	78.717926	2038.758512	184.124736	2038.758512	179.141607
2040.687328	102.172439	2040.687328	99.714652	2040.687328	106.7122	2040.687328	94.314768	2040.687328	184.155508	2040.687328	105.722348	2040.687328	78.757807	2040.687328	184.155508	2040.687328	179.158781
2042.616144	102.220101	2042.616144	99.71503	2042.616144	106.728595	2042.616144	94.320179	2042.616144	184.192011	2042.616144	105.754413	2042.616144	78.744408	2042.616144	184.192011	2042.616144	179.178382
2044.54496	102.253102	2044.54496	99.737593	2044.54496	106.764302	2044.54496	94.335057	2044.54496	184.230288	2044.54496	105.786219	2044.54496	78.714579	2044.54496	184.230288	2044.54496	179.188818
2046.473776	102.266919	2046.473776	99.775961	2046.473776	106.826233	2046.473776	94.34597	2046.473776	184.243762	2046.473776	105.812805	2046.473776	78.699849	2046.473776	184.243762	2046.473776	179.190184
2048.402592	102.252856	2048.402592	99.827032	2048.402592	106.949544	2048.402592	94.326262	2048.402592	184.237615	2048.402592	105.839588	2048.402592	78.699276	2048.402592	184.237615	2048.402592	179.184589
2050.331408	102.214555	2050.331408	99.914842	2050.331408	107.074461	2050.331408	94.310682	2050.331408	184.245094	2050.331408	105.870497	2050.331408	78.698728	2050.331408	184.245094	2050.331408	179.181658
2052.260224	102.182254	2052.260224	100.007531	2052.260224	107.100035	2052.260224	94.305116	2052.260224	184.261408	2052.260224	105.907346	2052.260224	78.705171	2052.260224	184.261408	2052.260224	179.188356
2054.18904	102.16843	2054.18904	100.036558	2054.18904	107.100577	2054.18904	94.30839	2054.18904	184.277039	2054.18904	105.925941	2054.18904	78.714753	2054.18904	184.277039	2054.18904	179.195928
2056.117856	102.17299	2056.117856	100.000401	2056.117856	107.097029	2056.117856	94.31717	2056.117856	184.295185	2056.117856	105.908614	2056.117856	78.729091	2056.117856	184.295185	2056.117856	179.19916
2058.046672	102.20146	2058.046672	99.95596	2058.046672	107.027142	2058.046672	94.337214	2058.046672	184.314335	2058.046672	105.909104	2058.046672	78.747961	2058.046672	184.314335	2058.046672	179.195634
2059.975488	102.241922	2059.975488	99.942226	2059.975488	106.934777	2059.975488	94.349996	2059.975488	184.337417	2059.975488	105.929581	2059.975488	78.768825	2059.975488	184.337417	2059.975488	179.186211
2061.904304	102.279393	2061.904304	99.939366	2061.904304	106.85129	2061.904304	94.335007	2061.904304	184.36721	2061.904304	105.951767	2061.904304	78.792581	2061.904304	184.36721	2061.904304	179.174243
2063.83312	102.311749	2063.83312	99.948879	2063.83312	106.824566	2063.83312	94.316986	2063.83312	184.395326	2063.83312	105.966638	2063.83312	78.827303	2063.83312	184.395326	2063.83312	179.168434
2065.761936	102.336028	2065.761936	99.962605	2065.761936	106.836791	2065.761936	94.322168	2065.761936	184.418606	2065.761936	105.973998	2065.761936	78.84184	2065.761936	184.418606	2065.761936	179.173445
2067.690752	102.35118	2067.690752	99.985341	2067.690752	106.882124	2067.690752	94.343453	2067.690752	184.437846	2067.690752	105.977984	2067.690752	78.829345	2067.690752	184.437846	2067.690752	179.187235
2069.619568	102.3607	2069.619568	100.016147	2069.619568	106.921565	2069.619568	94.377672	2069.619568	184.454704	2069.619568	105.987802	2069.619568	78.818805	2069.619568	184.454704	2069.619568	179.200561
2071.548384	102.364656	2071.548384	100.067388	2071.548384	106.971682	2071.548384	94.402461	2071.548384	184.461098	2071.548384	106.008179	2071.548384	78.823901	2071.548384	184.461098	2071.548384	179.207744
2073.4772	102.365351	2073.4772	100.124041	2073.4772	107.072444	2073.4772	94.419428	2073.4772	184.466509	2073.4772	106.037172	2073.4772	78.836339	2073.4772	184.466509	2073.4772	179.212098
2075.406016	102.372219	2075.406016	100.194525	2075.406016	107.140367	2075.406016	94.435344	2075.406016	184.478023	2075.406016	106.071467	2075.406016	78.847206	2075.406016	184.478023	2075.406016	179.211544
2077.334832	102.388683	2077.334832	100.252969	2077.334832	107.135737	2077.334832	94.453217	2077.334832	184.494088	2077.334832	106.104889	2077.334832	78.857681	2077.334832	184.494088	2077.334832	179.211929
2079.263648	102.412103	2079.263648	100.234946	2079.263648	107.139524	2079.263648	94.468649	2079.263648	184.510827	2079.263648	106.114686	2079.263648	78.872737	2079.263648	184.510827	2079.263648	179.214758
2081.192464	102.437077	2081.192464	100.165045	2081.192464	107.158856	2081.192464	94.488594	2081.192464	184.525341	2081.192464	106.108047	2081.192464	78.888535	2081.192464	184.525341	2081.192464	179.221236
2083.12128	102.45666	2083.12128	100.124266	2083.12128	107.171354	2083.12128	94.516634	2083.12128	184.543318	2083.12128	106.110005	2083.12128	78.907816	2083.12128	184.543318	2083.12128	179.233608
2085.050096	102.466811	2085.050096	100.115014	2085.050096	107.15764	2085.050096	94.521551	2085.050096	184.566461	2085.050096	106.118913	2085.050096	78.930933	2085.050096	184.566461	2085.050096	179.242175
2086.978912	102.465156	2086.978912	100.122739	2086.978912	107.142725	2086.978912	94.495822	2086.978912	184.592956	2086.978912	106.138405	2086.978912	78.95823	2086.978912	184.592956	2086.978912	179.239019
2088.907728	102.460861	2088.907728	100.135034	2088.907728	107.139743	2088.907728	94.488825	2088.907728	184.615543	2088.907728	106.165417	2088.907728	78.976921	2088.907728	184.615543	2088.907728	179.231642
2090.836544	102.458263	2090.836544	100.162307	2090.836544	107.180807	2090.836544	94.497074	2090.836544	184.636102	2090.836544	106.193999	2090.836544	78.972208	2090.836544	184.636102	2090.836544	179.229174
2092.76536	102.458189	2092.76536	100.197298	2092.76536	107.237365	2092.76536	94.520155	2092.76536	184.651912	2092.76536	106.221711	2092.76536	78.964442	2092.76536	184.651912	2092.76536	179.231441
2094.694176	102.466328	2094.694176	100.245784	2094.694176	107.269075	2094.694176	94.541742	2094.694176	184.654233	2094.694176	106.246794	2094.694176	78.969755	2094.694176	184.654233	2094.694176	179.238783
2096.622992	102.480141	2096.622992	100.302542	2096.622992	107.30928	2096.622992	94.556547	2096.622992	184.64961	2096.622992	106.268415	2096.622992	78.977128	2096.622992	184.64961	2096.622992	179.248617
2098.551808	102.495475	2098.551808	100.363913	2098.551808	107.360302	2098.551808	94.56443	2098.551808	184.653973	2098.551808	106.289878	2098.551808	78.986711	2098.551808	184.653973	2098.551808	179.255867
2100.480624	102.524831	2100.480624	100.426483	2100.480624	107.396533	2100.480624	94.583149	2100.480624	184.658639	2100.480624	106.313587	2100.480624	78.997995	2100.480624	184.658639	2100.480624	179.259685
2102.40944	102.558801	2102.40944	100.468949	2102.40944	107.393546	2102.40944	94.606073	2102.40944	184.665265	2102.40944	106.322098	2102.40944	79.014493	2102.40944	184.665265	2102.40944	179.260329
2104.338256	102.589962	2104.338256	100.463073	2104.338256	107.369411	2104.338256	94.635082	2104.338256	184.677641	2104.338256	106.317213	2104.338256	79.027977	2104.338256	184.677641	2104.338256	179.260914
2106.267072	102.613396	2106.267072	100.434927	2106.267072	107.365711	2106.267072	94.661315	2106.267072	184.696974	2106.267072	106.325858	2106.267072	79.043482	2106.267072	184.696974	2106.267072	179.263971
2108.195888	102.627555	2108.195888	100.417655	2108.195888	107.368354	2108.195888	94.684243	2108.195888	184.709914	2108.195888	106.342799	2108.195888	79.059326	2108.195888	184.709914	2108.195888	179.27336
2110.124704	102.632102	2110.124704	100.406253	2110.124704	107.376817	2110.124704	94.696598	2110.124704	184.718397	2110.124704	106.361846	2110.124704	79.078216	2110.124704	184.718397	2110.124704	179.282832
2112.05352	102.629981	2112.05352	100.396871	2112.05352	107.363584	2112.05352	94.70201	2112.05352	184.728236	2112.05352	106.377445	2112.05352	79.094413	2112.05352	184.728236	2112.05352	179.285547
2113.982336	102.62452	2113.982336	100.394852	2113.982336	107.343002	2113.982336	94.711023	2113.982336	184.739908	2113.982336	106.391566	2113.982336	79.100025	2113.982336	184.739908	2113.982336	179.279824
2115.911152	102.621638	2115.911152	100.394261	2115.911152	107.362719	2115.911152	94.731944	2115.911152	184.751316	2115.911152	106.402792	2115.911152	79.096263	2115.911152	184.751316	2115.911152	179.27273
2117.839968	102.620739	2117.839968	100.407741	2117.839968	107.388857	2117.839968	94.753587	2117.839968	184.759631	2117.839968	106.409623	2117.839968	79.095838	2117.839968	184.759631	2117.839968	179.268268
2119.768784	102.621128	2119.768784	100.42558	2119.768784	107.4071	2119.768784	94.775261	2119.768784	184.764214	2119.768784	106.416477	2119.768784	79.100416	2119.768784	184.764214	2119.768784	179.270734
2121.6976	102.623587	2121.6976	100.457974	2121.6976	107.43177	2121.6976	94.787826	2121.6976	184.767238	2121.6976	106.430505	2121.6976	79.108303	2121.6976	184.767238	2121.6976	179.279395
2123.626416	102.629705	2123.626416	100.49029	2123.626416	107.456327	2123.626416	94.800076	2123.626416	184.775942	2123.626416	106.453732	2123.626416	79.110478	2123.626416	184.775942	2123.626416	179.284887
2125.555232	102.644467	2125.555232	100.51638	2125.555232	107.498318	2125.555232	94.811881	2125.555232	184.789823	2125.555232	106.482175	2125.555232	79.111837	2125.555232	184.789823	2125.555232	179.28322
2127.484048	102.665221	2127.484048	100.539865	2127.484048	107.504595	2127.484048	94.8227	2127.484048	184.807166	2127.484048	106.502498	2127.484048	79.116318	2127.484048	184.807166	2127.484048	179.276967
2129.412864	102.685144	2129.412864	100.550434	2129.412864	107.483577	2129.412864	94.827886	2129.412864	184.826011	2129.412864	106.509565	2129.412864	79.123076	2129.412864	184.826011	2129.412864	179.268958
2131.34168	102.705035	2131.34168	100.558682	2131.34168	107.463921	2131.34168	94.829669	2131.34168	184.841577	2131.34168	106.514558	2131.34168	79.133189	2131.34168	184.841577	2131.34168	179.26102
2133.270496	102.722477	2133.270496	100.572951	2133.270496	107.468756	2133.270496	94.83181	2133.270496	184.853843	2133.270496	106.516023	2133.270496	79.14796	2133.270496	184.853843	2133.270496	179.258553
2135.199312	102.736221	2135.199312	100.579998	2135.199312	107.504671	2135.199312	94.835572	2135.199312	184.868666	2135.199312	106.515588	2135.199312	79.165033	2135.199312	184.868666	2135.199312	179.25964
2137.128128	102.747956	2137.128128	100.583996	2137.128128	107.52959	2137.128128	94.830936	2137.128128	184.88816	2137.128128	106.519995	2137.128128	79.181561	2137.128128	184.88816	2137.128128	179.263703
2139.056944	102.75959	2139.056944	100.583242	2139.056944	107.557851	2139.056944	94.829752	2139.056944	184.910594	2139.056944	106.534499	2139.056944	79.189228	2139.056944	184.910594	2139.056944	179.268121
2140.98576	102.770773	2140.98576	100.590062	2140.98576	107.617691	2140.98576	94.833093	2140.98576	184.93285	2140.98576	106.556533	2140.98576	79.191429	2140.98576	184.93285	2140.98576	179.270856
2142.914576	102.784506	2142.914576	100.60217	2142.914576	107.676513	2142.914576	94.847378	2142.914576	184.952029	2142.914576	106.581285	2142.914576	79.19359	2142.914576	184.952029	2142.914576	179.276207
2144.843392	102.799099	2144.843392	100.624518	2144.843392	107.728783	2144.843392	94.862489	2144.843392	184.966332	2144.843392	106.600779	2144.843392	79.201917	2144.843392	184.966332	2144.843392	179.285086
2146.772208	102.810713	2146.772208	100.65671	2146.772208	107.740511	2146.772208	94.878308	2146.772208	184.976658	2146.772208	106.610239	2146.772208	79.209696	2146.772208	184.976658	2146.772208	179.297781
2148.701024	102.819147	2148.701024	100.696295	2148.701024	107.737771	2148.701024	94.890937	2148.701024	184.991152	2148.701024	106.613964	2148.701024	79.218073	2148.701024	184.991152	2148.701024	179.312271
2150.62984	102.821443	2150.62984	100.719329	2150.62984	107.748013	2150.62984	94.906779	2150.62984	185.005782	2150.62984	106.616009	2150.62984	79.226557	2150.62984	185.005782	2150.62984	179.321282
2152.558656	102.817534	2152.558656	100.727038	2152.558656	107.752933	2152.558656	94.921905	2152.558656	185.025237	2152.558656	106.61932	2152.558656	79.233821	2152.558656	185.025237	2152.558656	179.324613
2154.487472	102.812116	2154.487472	100.728256	2154.487472	107.739076	2154.487472	94.933923	2154.487472	185.046696	2154.487472	106.629208	2154.487472	79.240171	2154.487472	185.046696	2154.487472	179.321671
2156.416288	102.809249	2156.416288	100.725159	2156.416288	107.706577	2156.416288	94.932958	2156.416288	185.067109	2156.416288	106.647271	2156.416288	79.249288	2156.416288	185.067109	2156.416288	179.316362
2158.345104	102.818469	2158.345104	100.717438	2158.345104	107.69749	2158.345104	94.925678	2158.345104	185.08578	2158.345104	106.665155	2158.345104	79.256598	2158.345104	185.08578	2158.345104	179.313111
2160.27392	102.841004	2160.27392	100.711593	2160.27392	107.706669	2160.27392	94.919986	2160.27392	185.103209	2160.27392	106.681009	2160.27392	79.264006	2160.27392	185.103209	2160.27392	179.313243
2162.202736	102.874677	2162.202736	100.703564	2162.202736	107.695671	2162.202736	94.924325	2162.202736	185.12394	2162.202736	106.68931	2162.202736	79.262146	2162.202736	185.12394	2162.202736	179.314583
2164.131552	102.914381	2164.131552	100.708789	2164.131552	107.684646	2164.131552	94.925958	2164.131552	185.142932	2164.131552	106.693793	2164.131552	79.260612	2164.131552	185.142932	2164.131552	179.317168
2166.060368	102.951137	2166.060368	100.723774	2166.060368	107.680735	2166.060368	94.925476	2166.060368	185.153974	2166.060368	106.698328	2166.060368	79.266011	2166.060368	185.153974	2166.060368	179.317936
2167.989184	102.974381	2167.989184	100.749307	2167.989184	107.70613	2167.989184	94.915522	2167.989184	185.164062	2167.989184	106.705603	2167.989184	79.270381	2167.989184	185.164062	2167.989184	179.318016
2169.918	102.983921	2169.918	100.781564	2169.918	107.737741	2169.918	94.909018	2169.918	185.176928	2169.918	106.717764	2169.918	79.272199	2169.918	185.176928	2169.918	179.316836
2171.846816	102.977286	2171.846816	100.818253	2171.846816	107.754983	2171.846816	94.909499	2171.846816	185.190333	2171.846816	106.733636	2171.846816	79.27522	2171.846816	185.190333	2171.846816	179.313458
2173.775632	102.960982	2173.775632	100.861974	2173.775632	107.770545	2173.775632	94.908226	2173.775632	185.200323	2173.775632	106.747591	2173.775632	79.279928	2173.775632	185.200323	2173.775632	179.313163
2175.704448	102.942409	2175.704448	100.897716	2175.704448	107.789976	2175.704448	94.91015	2175.704448	185.210457	2175.704448	106.759931	2175.704448	79.291655	2175.704448	185.210457	2175.704448	179.317988
2177.633264	102.925219	2177.633264	100.921358	2177.633264	107.822634	2177.633264	94.917135	2177.633264	185.224052	2177.633264	106.773545	2177.633264	79.302261	2177.633264	185.224052	2177.633264	179.323476
2179.56208	102.916376	2179.56208	100.934251	2179.56208	107.834391	2179.56208	94.916293	2179.56208	185.24083	2179.56208	106.786324	2179.56208	79.315973	2179.56208	185.24083	2179.56208	179.328166
2181.490896	102.920436	2181.490896	100.930995	2181.490896	107.82338	2181.490896	94.916505	2181.490896	185.25909	2181.490896	106.797413	2181.490896	79.331154	2181.490896	185.25909	2181.490896	179.329975
2183.419712	102.935481	2183.419712	100.915757	2183.419712	107.832603	2183.419712	94.909791	2183.419712	185.275934	2183.419712	106.805437	2183.419712	79.346334	2183.419712	185.275934	2183.419712	179.330579
2185.348528	102.957782	2185.348528	100.884125	2185.348528	107.841235	2185.348528	94.909362	2185.348528	185.288411	2185.348528	106.812689	2185.348528	79.359881	2185.348528	185.288411	2185.348528	179.330509
2187.277344	102.978945	2187.277344	100.850148	2187.277344	107.850954	2187.277344	94.914174	2187.277344	185.298607	2187.277344	106.824931	2187.277344	79.371987	2187.277344	185.298607	2187.277344	179.329814
2189.20616	102.994892	2189.20616	100.815895	2189.20616	107.844203	2189.20616	94.9142	2189.20616	185.308594	2189.20616	106.842389	2189.20616	79.382342	2189.20616	185.308594	2189.20616	179.332655
2191.134976	103.007545	2191.134976	100.798137	2191.134976	107.842191	2191.134976	94.911091	2191.134976	185.318885	2191.134976	106.865192	2191.134976	79.393332	2191.134976	185.318885	2191.134976	179.337671
2193.063792	103.013556	2193.063792	100.796689	2193.063792	107.869068	2193.063792	94.914896	2193.063792	185.327618	2193.063792	106.891219	2193.063792	79.405358	2193.063792	185.327618	2193.063792	179.342488
2194.992608	103.014659	2194.992608	100.805395	2194.992608	107.896257	2194.992608	94.925433	2194.992608	185.339046	2194.992608	106.911323	2194.992608	79.421647	2194.992608	185.339046	2194.992608	179.344089
2196.921424	103.018466	2196.921424	100.829062	2196.921424	107.923573	2196.921424	94.937676	2196.921424	185.349754	2196.921424	106.923309	2196.921424	79.437036	2196.921424	185.349754	2196.921424	179.336202
2198.85024	103.026732	2198.85024	100.866675	2198.85024	107.940217	2198.85024	94.945142	2198.85024	185.35686	2198.85024	106.929095	2198.85024	79.451774	2198.85024	185.35686	2198.85024	179.323064
2200.779056	103.042671	2200.779056	100.912717	2200.779056	107.965698	2200.779056	94.956894	2200.779056	185.363398	2200.779056	106.930993	2200.779056	79.461611	2200.779056	185.363398	2200.779056	179.318464
2202.707872	103.062842	2202.707872	100.957623	2202.707872	108.02182	2202.707872	94.971024	2202.707872	185.373702	2202.707872	106.936883	2202.707872	79.474793	2202.707872	185.373702	2202.707872	179.325491
2204.636688	103.083512	2204.636688	101.000099	2204.636688	108.050433	2204.636688	94.980686	2204.636688	185.385118	2204.636688	106.950617	2204.636688	79.491755	2204.636688	185.385118	2204.636688	179.339882
2206.565504	103.100133	2206.565504	101.037568	2206.565504	108.051604	2206.565504	94.981836	2206.565504	185.394206	2206.565504	106.970348	2206.565504	79.504068	2206.565504	185.394206	2206.565504	179.353002
2208.49432	103.107605	2208.49432	101.058621	2208.49432	108.026845	2208.49432	94.980813	2208.49432	185.399767	2208.49432	106.991094	2208.49432	79.513689	2208.49432	185.399767	2208.49432	179.358627
2210.423136	103.10664	2210.423136	101.065642	2210.423136	107.99818	2210.423136	94.977332	2210.423136	185.405995	2210.423136	107.008916	2210.423136	79.525344	2210.423136	185.405995	2210.423136	179.355512
2212.351952	103.10153	2212.351952	101.055383	2212.351952	107.984639	2212.351952	94.977804	2212.351952	185.411656	2212.351952	107.018969	2212.351952	79.534528	2212.351952	185.411656	2212.351952	179.350214
2214.280768	103.096055	2214.280768	101.035001	2214.280768	107.952258	2214.280768	94.977108	2214.280768	185.417006	2214.280768	107.025534	2214.280768	79.544012	2214.280768	185.417006	2214.280768	179.351032
2216.209584	103.096693	2216.209584	101.011488	2216.209584	107.914371	2216.209584	94.972328	2216.209584	185.422295	2216.209584	107.030877	2216.209584	79.554407	2216.209584	185.422295	2216.209584	179.360992
2218.1384	103.10396	2218.1384	100.992524	2218.1384	107.880725	2218.1384	94.976638	2218.1384	185.427728	2218.1384	107.036613	2218.1384	79.567863	2218.1384	185.427728	2218.1384	179.370738
2220.067216	103.118401	2220.067216	100.980054	2220.067216	107.867017	2220.067216	94.98975	2220.067216	185.434174	2220.067216	107.045282	2220.067216	79.576038	2220.067216	185.434174	2220.067216	179.375391
2221.996032	103.141075	2221.996032	100.969755	2221.996032	107.881034	2221.996032	95.003269	2221.996032	185.438546	2221.996032	107.05656	2221.996032	79.581017	2221.996032	185.438546	2221.996032	179.373958
2223.924848	103.164395	2223.924848	100.971023	2223.924848	107.877398	2223.924848	95.023939	2223.924848	185.442387	2223.924848	107.070328	2223.924848	79.588664	2223.924848	185.442387	2223.924848	179.364593
2225.853664	103.182536	2225.853664	100.983687	2225.853664	107.890806	2225.853664	95.046233	2225.853664	185.447644	2225.853664	107.083214	2225.853664	79.59691	2225.853664	185.447644	2225.853664	179.351259
2227.78248	103.192056	2227.78248	100.994313	2227.78248	107.936394	2227.78248	95.077551	2227.78248	185.456236	2227.78248	107.092327	2227.78248	79.602082	2227.78248	185.456236	2227.78248	179.3483
2229.711296	103.191662	2229.711296	101.012287	2229.711296	108.00672	2229.711296	95.110722	2229.711296	185.465151	2229.711296	107.09841	2229.711296	79.607631	2229.711296	185.465151	2229.711296	179.360052
2231.640112	103.187825	2231.640112	101.034539	2231.640112	108.088021	2231.640112	95.13688	2231.640112	185.470125	2231.640112	107.10311	2231.640112	79.612064	2231.640112	185.470125	2231.640112	179.37335
2233.568928	103.183803	2233.568928	101.064165	2233.568928	108.142324	2233.568928	95.152693	2233.568928	185.476287	2233.568928	107.106109	2233.568928	79.61911	2233.568928	185.476287	2233.568928	179.378281
2235.497744	103.181667	2235.497744	101.089554	2235.497744	108.190309	2235.497744	95.157635	2235.497744	185.483342	2235.497744	107.109865	2235.497744	79.622353	2235.497744	185.483342	2235.497744	179.374431
2237.42656	103.185102	2237.42656	101.114416	2237.42656	108.227161	2237.42656	95.160777	2237.42656	185.491987	2237.42656	107.117545	2237.42656	79.626008	2237.42656	185.491987	2237.42656	179.367128
2239.355376	103.192931	2239.355376	101.132564	2239.355376	108.236662	2239.355376	95.155943	2239.355376	185.500711	2239.355376	107.129919	2239.355376	79.631415	2239.355376	185.500711	2239.355376	179.365723
2241.284192	103.203649	2241.284192	101.140379	2241.284192	108.215141	2241.284192	95.138306	2241.284192	185.506836	2241.284192	107.147634	2241.284192	79.633025	2241.284192	185.506836	2241.284192	179.372765
2243.213008	103.219242	2243.213008	101.141363	2243.213008	108.159378	2243.213008	95.120177	2243.213008	185.513986	2243.213008	107.167749	2243.213008	79.632436	2243.213008	185.513986	2243.213008	179.381862
2245.141824	103.233825	2245.141824	101.130937	2245.141824	108.128503	2245.141824	95.102493	2245.141824	185.523813	2245.141824	107.183618	2245.141824	79.634665	2245.141824	185.523813	2245.141824	179.387529
2247.07064	103.245303	2247.07064	101.112546	2247.07064	108.11077	2247.07064	95.090147	2247.07064	185.536119	2247.07064	107.192142	2247.07064	79.63939	2247.07064	185.536119	2247.07064	179.389717
2248.999456	103.255099	2248.999456	101.093474	2248.999456	108.087581	2248.999456	95.0805	2248.999456	185.549647	2248.999456	107.194939	2248.999456	79.643551	2248.999456	185.549647	2248.999456	179.385948
2250.928272	103.262148	2250.928272	101.0785	2250.928272	108.070769	2250.928272	95.073377	2250.928272	185.565472	2250.928272	107.198423	2250.928272	79.644468	2250.928272	185.565472	2250.928272	179.371976
2252.857088	103.267857	2252.857088	101.076999	2252.857088	108.068337	2252.857088	95.077236	2252.857088	185.584841	2252.857088	107.207364	2252.857088	79.651967	2252.857088	185.584841	2252.857088	179.355601
2254.785904	103.269779	2254.785904	101.086141	2254.785904	108.101256	2254.785904	95.092872	2254.785904	185.60374	2254.785904	107.223034	2254.785904	79.663283	2254.785904	185.60374	2254.785904	179.350092
2256.71472	103.268725	2256.71472	101.114377	2256.71472	108.130597	2256.71472	95.116997	2256.71472	185.621906	2256.71472	107.243872	2256.71472	79.676784	2256.71472	185.621906	2256.71472	179.357386
2258.643536	103.270518	2258.643536	101.148626	2258.643536	108.140232	2258.643536	95.137822	2258.643536	185.638858	2258.643536	107.266704	2258.643536	79.691362	2258.643536	185.638858	2258.643536	179.365957
2260.572352	103.273727	2260.572352	101.186006	2260.572352	108.152679	2260.572352	95.158469	2260.572352	185.657368	2260.572352	107.287725	2260.572352	79.704856	2260.572352	185.657368	2260.572352	179.369528
2262.501168	103.280222	2262.501168	101.221397	2262.501168	108.174707	2262.501168	95.180045	2262.501168	185.676026	2262.501168	107.303278	2262.501168	79.7176	2262.501168	185.676026	2262.501168	179.369122
2264.429984	103.292684	2264.429984	101.246959	2264.429984	108.229094	2264.429984	95.196159	2264.429984	185.689324	2264.429984	107.311888	2264.429984	79.729164	2264.429984	185.689324	2264.429984	179.36763
2266.3588	103.308154	2266.3588	101.258238	2266.3588	108.258117	2266.3588	95.204586	2266.3588	185.702722	2266.3588	107.313272	2266.3588	79.742873	2266.3588	185.702722	2266.3588	179.370546
2268.287616	103.32726	2268.287616	101.255507	2268.287616	108.259505	2268.287616	95.202247	2268.287616	185.721666	2268.287616	107.314643	2268.287616	79.756973	2268.287616	185.721666	2268.287616	179.374962
2270.216432	103.34875	2270.216432	101.236154	2270.216432	108.265797	2270.216432	95.196181	2270.216432	185.741092	2270.216432	107.322285	2270.216432	79.76377	2270.216432	185.741092	2270.216432	179.381477
2272.145248	103.365553	2272.145248	101.207232	2272.145248	108.272572	2272.145248	95.184829	2272.145248	185.753386	2272.145248	107.33005	2272.145248	79.771187	2272.145248	185.753386	2272.145248	179.391158
2274.074064	103.37665	2274.074064	101.178137	2274.074064	108.275901	2274.074064	95.166877	2274.074064	185.755942	2274.074064	107.330687	2274.074064	79.770409	2274.074064	185.755942	2274.074064	179.394635
2276.00288	103.378699	2276.00288	101.164501	2276.00288	108.231704	2276.00288	95.139855	2276.00288	185.754225	2276.00288	107.319117	2276.00288	79.761531	2276.00288	185.754225	2276.00288	179.387645
2277.931696	103.370379	2277.931696	101.15763	2277.931696	108.175664	2277.931696	95.108163	2277.931696	185.746002	2277.931696	107.285602	2277.931696	79.745206	2277.931696	185.746002	2277.931696	179.375544
2279.860512	103.354024	2279.860512	101.165348	2279.860512	108.164237	2279.860512	95.083223	2279.860512	185.729868	2279.860512	107.230467	2279.860512	79.719752	2279.860512	185.729868	2279.860512	179.363026
2281.789328	103.331964	2281.789328	101.177319	2281.789328	108.176342	2281.789328	95.050051	2281.789328	185.704182	2281.789328	107.167838	2281.789328	79.68562	2281.789328	185.704182	2281.789328	179.355338
2283.718144	103.30632	2283.718144	101.179733	2283.718144	108.203624	2283.718144	95.008794	2283.718144	185.662669	2283.718144	107.109807	2283.718144	79.639939	2283.718144	185.662669	2283.718144	179.356001
2285.64696	103.28233	2285.64696	101.159568	2285.64696	108.201845	2285.64696	94.964748	2285.64696	185.603379	2285.64696	107.056381	2285.64696	79.574146	2285.64696	185.603379	2285.64696	179.356974
2287.575776	103.261177	2287.575776	101.111929	2287.575776	108.205139	2287.575776	94.909659	2287.575776	185.529736	2287.575776	106.997641	2287.575776	79.484198	2287.575776	185.529736	2287.575776	179.343988
2289.504592	103.247972	2289.504592	101.036232	2289.504592	108.223261	2289.504592	94.847278	2289.504592	185.450553	2289.504592	106.921401	2289.504592	79.3685	2289.504592	185.450553	2289.504592	179.3119
2291.433408	103.240562	2291.433408	100.930246	2291.433408	108.198065	2291.433408	94.757705	2291.433408	185.371169	2291.433408	106.838414	2291.433408	79.247298	2291.433408	185.371169	2291.433408	179.27306
2293.362224	103.216789	2293.362224	100.803004	2293.362224	108.126887	2293.362224	94.638693	2293.362224	185.293357	2293.362224	106.758674	2293.362224	79.120694	2293.362224	185.293357	2293.362224	179.240471
2295.29104	103.17192	2295.29104	100.647017	2295.29104	108.011921	2295.29104	94.503524	2295.29104	185.213002	2295.29104	106.681741	2295.29104	78.984147	2295.29104	185.213002	2295.29104	179.212261
2297.219856	103.112793	2297.219856	100.463781	2297.219856	107.913505	2297.219856	94.35356	2297.219856	185.110488	2297.219856	106.594625	2297.219856	78.837098	2297.219856	185.110488	2297.219856	179.191319
2299.148672	103.043272	2299.148672	100.257461	2299.148672	107.836144	2299.148672	94.215977	2299.148672	184.996424	2299.148672	106.505009	2299.148672	78.681051	2299.148672	184.996424	2299.148672	179.172111
2301.077488	102.97302	2301.077488	100.030103	2301.077488	107.700359	2301.077488	94.080123	2301.077488	184.898265	2301.077488	106.425148	2301.077488	78.523085	2301.077488	184.898265	2301.077488	179.139427
2303.006304	102.904762	2303.006304	99.80659	2303.006304	107.532367	2303.006304	93.940503	2303.006304	184.82007	2303.006304	106.365477	2303.006304	78.373791	2303.006304	184.82007	2303.006304	179.097147
2304.93512	102.851439	2304.93512	99.613117	2304.93512	107.367938	2304.93512	93.798911	2304.93512	184.742665	2304.93512	106.341806	2304.93512	78.231881	2304.93512	184.742665	2304.93512	179.057368
2306.863936	102.826893	2306.863936	99.467078	2306.863936	107.262694	2306.863936	93.656371	2306.863936	184.670228	2306.863936	106.372313	2306.863936	78.102659	2306.863936	184.670228	2306.863936	179.022941
2308.792752	102.82893	2308.792752	99.357291	2308.792752	107.203384	2308.792752	93.559786	2308.792752	184.624037	2308.792752	106.469145	2308.792752	77.985975	2308.792752	184.624037	2308.792752	179.00185
2310.721568	102.846995	2310.721568	99.261495	2310.721568	107.144829	2310.721568	93.508262	2310.721568	184.60341	2310.721568	106.544485	2310.721568	77.899814	2310.721568	184.60341	2310.721568	178.987541
2312.650384	102.874362	2312.650384	99.198476	2312.650384	107.132738	2312.650384	93.482254	2312.650384	184.607163	2312.650384	106.531622	2312.650384	77.85503	2312.650384	184.607163	2312.650384	178.965709
2314.5792	102.901014	2314.5792	99.206192	2314.5792	107.165321	2314.5792	93.473959	2314.5792	184.653596	2314.5792	106.482424	2314.5792	77.857054	2314.5792	184.653596	2314.5792	178.931451
2316.508016	102.916375	2316.508016	99.28136	2316.508016	107.239873	2316.508016	93.489964	2316.508016	184.741303	2316.508016	106.446233	2316.508016	77.896583	2316.508016	184.741303	2316.508016	178.882276
2318.436832	102.915491	2318.436832	99.403435	2318.436832	107.324806	2318.436832	93.559422	2318.436832	184.830622	2318.436832	106.437887	2318.436832	77.969591	2318.436832	184.830622	2318.436832	178.833091
2320.365648	102.914817	2320.365648	99.527359	2320.365648	107.378176	2320.365648	93.702866	2320.365648	184.88935	2320.365648	106.466015	2320.365648	78.071863	2320.365648	184.88935	2320.365648	178.786291
2322.294464	102.928355	2322.294464	99.686876	2322.294464	107.487097	2322.294464	93.903782	2322.294464	184.926807	2322.294464	106.532823	2322.294464	78.251535	2322.294464	184.926807	2322.294464	178.745227
2324.22328	102.963357	2324.22328	99.879565	2324.22328	107.634556	2324.22328	94.140898	2324.22328	184.968386	2324.22328	106.629195	2324.22328	78.505263	2324.22328	184.968386	2324.22328	178.716002
2326.152096	103.017032	2326.152096	100.106959	2326.152096	107.820836	2326.152096	94.406185	2326.152096	185.025343	2326.152096	106.742936	2326.152096	78.746902	2326.152096	185.025343	2326.152096	178.692203
2328.080912	103.096118	2328.080912	100.353921	2328.080912	108.029447	2328.080912	94.656041	2328.080912	185.0999	2328.080912	106.872925	2328.080912	78.927012	2328.080912	185.0999	2328.080912	178.674494
2330.009728	103.185402	2330.009728	100.640279	2330.009728	108.300075	2330.009728	94.85685	2330.009728	185.171026	2330.009728	107.00998	2330.009728	79.065495	2330.009728	185.171026	2330.009728	178.66646
2331.938544	103.272304	2331.938544	100.953128	2331.938544	108.68689	2331.938544	95.007857	2331.938544	185.236857	2331.938544	107.148314	2331.938544	79.15566	2331.938544	185.236857	2331.938544	178.667784
2333.86736	103.353369	2333.86736	101.168397	2333.86736	109.062204	2333.86736	95.090573	2333.86736	185.318074	2333.86736	107.287091	2333.86736	79.211878	2333.86736	185.318074	2333.86736	178.634435
2335.796176	103.417702	2335.796176	101.24746	2335.796176	109.364064	2335.796176	95.142657	2335.796176	185.415006	2335.796176	107.423148	2335.796176	79.26198	2335.796176	185.415006	2335.796176	178.555228
2337.724992	103.4729	2337.724992	101.20089	2337.724992	109.483673	2337.724992	95.203718	2337.724992	185.51143	2337.724992	107.545915	2337.724992	79.298173	2337.724992	185.51143	2337.724992	178.488567
2339.653808	103.527986	2339.653808	101.083205	2339.653808	109.397611	2339.653808	95.274923	2339.653808	185.59161	2339.653808	107.647019	2339.653808	79.33634	2339.653808	185.59161	2339.653808	178.479808
2341.582624	103.591484	2341.582624	100.949154	2341.582624	109.226511	2341.582624	95.330311	2341.582624	185.66157	2341.582624	107.7145	2341.582624	79.396702	2341.582624	185.66157	2341.582624	178.508886
2343.51144	103.663035	2343.51144	100.784377	2343.51144	108.93146	2343.51144	95.328739	2343.51144	185.721964	2343.51144	107.733255	2343.51144	79.447405	2343.51144	185.721964	2343.51144	178.54795
2345.440256	103.726961	2345.440256	100.616126	2345.440256	108.605492	2345.440256	95.32596	2345.440256	185.768644	2345.440256	107.697179	2345.440256	79.484797	2345.440256	185.768644	2345.440256	178.582961
2347.369072	103.779184	2347.369072	100.466474	2347.369072	108.36915	2347.369072	95.362534	2347.369072	185.796801	2347.369072	107.615701	2347.369072	79.507226	2347.369072	185.796801	2347.369072	178.61325
2349.297888	103.80806	2349.297888	100.42642	2349.297888	108.345086	2349.297888	95.405693	2349.297888	185.792673	2349.297888	107.502672	2349.297888	79.522532	2349.297888	185.792673	2349.297888	178.65563
2351.226704	103.805387	2351.226704	100.506946	2351.226704	108.519222	2351.226704	95.42947	2351.226704	185.74995	2351.226704	107.375355	2351.226704	79.53067	2351.226704	185.74995	2351.226704	178.706986
2353.15552	103.769091	2353.15552	100.696314	2353.15552	108.687421	2353.15552	95.411691	2353.15552	185.665763	2353.15552	107.253273	2353.15552	79.523505	2353.15552	185.665763	2353.15552	178.737702
2355.084336	103.698131	2355.084336	100.936684	2355.084336	108.881582	2355.084336	95.403336	2355.084336	185.549572	2355.084336	107.146247	2355.084336	79.498096	2355.084336	185.549572	2355.084336	178.736317
2357.013152	103.612617	2357.013152	101.181103	2357.013152	109.051438	2357.013152	95.421278	2357.013152	185.43724	2357.013152	107.045775	2357.013152	79.466153	2357.013152	185.43724	2357.013152	178.691343
2358.941968	103.532761	2358.941968	101.344415	2358.941968	109.116065	2358.941968	95.4323	2358.941968	185.343215	2358.941968	106.940461	2358.941968	79.433302	2358.941968	185.343215	2358.941968	178.595184
2360.870784	103.459621	2360.870784	101.346626	2360.870784	109.076693	2360.870784	95.40147	2360.870784	185.259536	2360.870784	106.827177	2360.870784	79.410692	2360.870784	185.259536	2360.870784	178.435502
2362.7996	103.401115	2362.7996	101.220204	2362.7996	108.868548	2362.7996	95.326485	2362.7996	185.180129	2362.7996	106.715285	2362.7996	79.405315	2362.7996	185.180129	2362.7996	178.27423
2364.728416	103.360342	2364.728416	100.994314	2364.728416	108.617627	2364.728416	95.213898	2364.728416	185.128779	2364.728416	106.621846	2364.728416	79.425989	2364.728416	185.128779	2364.728416	178.182184
2366.657232	103.339761	2366.657232	100.683465	2366.657232	108.377608	2366.657232	95.04686	2366.657232	185.118588	2366.657232	106.546932	2366.657232	79.463857	2366.657232	185.118588	2366.657232	178.150384
2368.586048	103.337656	2368.586048	100.342189	2368.586048	108.120922	2368.586048	94.842446	2368.586048	185.131684	2368.586048	106.485374	2368.586048	79.528771	2368.586048	185.131684	2368.586048	178.139959
2370.514864	103.335485	2370.514864	99.993877	2370.514864	107.813861	2370.514864	94.633111	2370.514864	185.158492	2370.514864	106.43885	2370.514864	79.622227	2370.514864	185.158492	2370.514864	178.152036
2372.44368	103.324033	2372.44368	99.709342	2372.44368	107.458164	2372.44368	94.443025	2372.44368	185.196468	2372.44368	106.426759	2372.44368	79.751607	2372.44368	185.196468	2372.44368	178.195912
2374.372496	103.309618	2374.372496	99.530333	2374.372496	107.243227	2374.372496	94.328118	2374.372496	185.225918	2374.372496	106.447179	2374.372496	79.843774	2374.372496	185.225918	2374.372496	178.288411
2376.301312	103.286402	2376.301312	99.499181	2376.301312	107.193205	2376.301312	94.289358	2376.301312	185.22504	2376.301312	106.492265	2376.301312	79.835886	2376.301312	185.22504	2376.301312	178.430618
2378.230128	103.258951	2378.230128	99.620217	2378.230128	107.21851	2378.230128	94.312254	2378.230128	185.216997	2378.230128	106.554947	2378.230128	79.786133	2378.230128	185.216997	2378.230128	178.594015
2380.158944	103.240771	2380.158944	99.851556	2380.158944	107.334856	2380.158944	94.366257	2380.158944	185.240839	2380.158944	106.613653	2380.158944	79.747776	2380.158944	185.240839	2380.158944	178.747292
2382.08776	103.243471	2382.08776	100.159276	2382.08776	107.53831	2382.08776	94.444606	2382.08776	185.299427	2382.08776	106.638175	2382.08776	79.713271	2382.08776	185.299427	2382.08776	178.884811
2384.016576	103.266359	2384.016576	100.501624	2384.016576	107.855527	2384.016576	94.581881	2384.016576	185.383256	2384.016576	106.591358	2384.016576	79.711122	2384.016576	185.383256	2384.016576	179.008412
2385.945392	103.300462	2385.945392	100.85518	2385.945392	108.19159	2385.945392	94.753653	2385.945392	185.486445	2385.945392	106.545605	2385.945392	79.740582	2385.945392	185.486445	2385.945392	179.113683
2387.874208	103.336989	2387.874208	101.196664	2387.874208	108.461094	2387.874208	94.944286	2387.874208	185.594066	2387.874208	106.587667	2387.874208	79.784168	2387.874208	185.594066	2387.874208	179.19992
2389.803024	103.383447	2389.803024	101.488957	2389.803024	108.661743	2389.803024	95.129184	2389.803024	185.717194	2389.803024	106.696719	2389.803024	79.850926	2389.803024	185.717194	2389.803024	179.274664
2391.73184	103.423928	2391.73184	101.710675	2391.73184	108.796222	2391.73184	95.283734	2391.73184	185.862009	2391.73184	106.833532	2391.73184	79.931435	2391.73184	185.862009	2391.73184	179.32296
2393.660656	103.46242	2393.660656	101.844767	2393.660656	108.881749	2393.660656	95.421182	2393.660656	186.011547	2393.660656	106.982273	2393.660656	80.005712	2393.660656	186.011547	2393.660656	179.338935
2395.589472	103.507382	2395.589472	101.909875	2395.589472	108.903345	2395.589472	95.507518	2395.589472	186.145348	2395.589472	107.133902	2395.589472	80.077651	2395.589472	186.145348	2395.589472	179.331843
2397.518288	103.554104	2397.518288	101.915078	2397.518288	108.881237	2397.518288	95.551641	2397.518288	186.260187	2397.518288	107.285167	2397.518288	80.142378	2397.518288	186.260187	2397.518288	179.31462
2399.447104	103.611493	2399.447104	101.89326	2399.447104	108.867721	2399.447104	95.563234	2399.447104	186.367722	2399.447104	107.437462	2399.447104	80.203311	2399.447104	186.367722	2399.447104	179.301922
2401.37592	103.672875	2401.37592	101.866885	2401.37592	108.854663	2401.37592	95.542842	2401.37592	186.456875	2401.37592	107.591902	2401.37592	80.246828	2401.37592	186.456875	2401.37592	179.303608
2403.304736	103.723633	2403.304736	101.840262	2403.304736	108.84483	2403.304736	95.507344	2403.304736	186.51736	2403.304736	107.735599	2403.304736	80.270571	2403.304736	186.51736	2403.304736	179.31223
2405.233552	103.754903	2405.233552	101.812088	2405.233552	108.818153	2405.233552	95.468329	2405.233552	186.54788	2405.233552	107.862576	2405.233552	80.279147	2405.233552	186.54788	2405.233552	179.31827
2407.162368	103.763209	2407.162368	101.788419	2407.162368	108.783867	2407.162368	95.441985	2407.162368	186.552223	2407.162368	107.970026	2407.162368	80.278933	2407.162368	186.552223	2407.162368	179.317853
2409.091184	103.756706	2409.091184	101.770425	2409.091184	108.769531	2409.091184	95.42991	2409.091184	186.540561	2409.091184	108.048872	2409.091184	80.272156	2409.091184	186.540561	2409.091184	179.312
2411.02	103.744417	2411.02	101.756863	2411.02	108.76234	2411.02	95.422675	2411.02	186.516981	2411.02	108.091758	2411.02	80.264678	2411.02	186.516981	2411.02	179.303415
2412.948816	103.7341	2412.948816	101.751439	2412.948816	108.754834	2412.948816	95.42555	2412.948816	186.493358	2412.948816	108.101561	2412.948816	80.264184	2412.948816	186.493358	2412.948816	179.292873
2414.877632	103.728944	2414.877632	101.757506	2414.877632	108.742963	2414.877632	95.427746	2414.877632	186.47969	2414.877632	108.082255	2414.877632	80.269066	2414.877632	186.47969	2414.877632	179.287179
2416.806448	103.72747	2416.806448	101.773336	2416.806448	108.750273	2416.806448	95.441658	2416.806448	186.475391	2416.806448	108.04441	2416.806448	80.274754	2416.806448	186.475391	2416.806448	179.286364
2418.735264	103.72523	2418.735264	101.800203	2418.735264	108.784463	2418.735264	95.459538	2418.735264	186.476512	2418.735264	108.002659	2418.735264	80.284099	2418.735264	186.476512	2418.735264	179.285488
2420.66408	103.7222	2420.66408	101.836177	2420.66408	108.819875	2420.66408	95.467101	2420.66408	186.476072	2420.66408	107.970918	2420.66408	80.292064	2420.66408	186.476072	2420.66408	179.283864
2422.592896	103.715646	2422.592896	101.874172	2422.592896	108.862733	2422.592896	95.470294	2422.592896	186.475969	2422.592896	107.956541	2422.592896	80.297862	2422.592896	186.475969	2422.592896	179.278565
2424.521712	103.704916	2424.521712	101.914075	2424.521712	108.893124	2424.521712	95.469916	2424.521712	186.477821	2424.521712	107.958045	2424.521712	80.297464	2424.521712	186.477821	2424.521712	179.271832
2426.450528	103.695141	2426.450528	101.94229	2426.450528	108.924209	2426.450528	95.472291	2426.450528	186.478821	2426.450528	107.966896	2426.450528	80.294636	2426.450528	186.478821	2426.450528	179.268146
2428.379344	103.689513	2428.379344	101.960695	2428.379344	108.953513	2428.379344	95.476533	2428.379344	186.477514	2428.379344	107.976708	2428.379344	80.296677	2428.379344	186.477514	2428.379344	179.270109
2430.30816	103.689848	2430.30816	101.961764	2430.30816	108.948253	2430.30816	95.475987	2430.30816	186.476967	2430.30816	107.980178	2430.30816	80.298039	2430.30816	186.476967	2430.30816	179.271882
2432.236976	103.700591	2432.236976	101.9518	2432.236976	108.929308	2432.236976	95.475762	2432.236976	186.484491	2432.236976	107.979578	2432.236976	80.298147	2432.236976	186.484491	2432.236976	179.271855
2434.165792	103.720367	2434.165792	101.937794	2434.165792	108.912886	2434.165792	95.473001	2434.165792	186.496171	2434.165792	107.978081	2434.165792	80.301024	2434.165792	186.496171	2434.165792	179.266778
2436.094608	103.744624	2436.094608	101.917538	2436.094608	108.912783	2436.094608	95.473415	2436.094608	186.504019	2436.094608	107.980929	2436.094608	80.304765	2436.094608	186.504019	2436.094608	179.258372
2438.023424	103.766649	2438.023424	101.902281	2438.023424	108.925825	2438.023424	95.467978	2438.023424	186.506331	2438.023424	107.991043	2438.023424	80.312218	2438.023424	186.506331	2438.023424	179.248045
2439.95224	103.778267	2439.95224	101.888424	2439.95224	108.936984	2439.95224	95.464872	2439.95224	186.507614	2439.95224	108.007597	2439.95224	80.31492	2439.95224	186.507614	2439.95224	179.241567
2441.881056	103.777998	2441.881056	101.882299	2441.881056	108.960031	2441.881056	95.470814	2441.881056	186.515517	2441.881056	108.023869	2441.881056	80.31507	2441.881056	186.515517	2441.881056	179.239707
2443.809872	103.769813	2443.809872	101.884302	2443.809872	108.979836	2443.809872	95.480078	2443.809872	186.525883	2443.809872	108.035659	2443.809872	80.316568	2443.809872	186.525883	2443.809872	179.237863
2445.738688	103.755638	2445.738688	101.895087	2445.738688	109.009432	2445.738688	95.491183	2445.738688	186.531499	2445.738688	108.042491	2445.738688	80.317441	2445.738688	186.531499	2445.738688	179.236661
2447.667504	103.741641	2447.667504	101.907973	2447.667504	109.040312	2447.667504	95.498791	2447.667504	186.535282	2447.667504	108.042907	2447.667504	80.318967	2447.667504	186.535282	2447.667504	179.236501
2449.59632	103.733634	2449.59632	101.919321	2449.59632	109.041231	2449.59632	95.508578	2449.59632	186.540055	2449.59632	108.039924	2449.59632	80.321966	2449.59632	186.540055	2449.59632	179.233637
2451.525136	103.73383	2451.525136	101.928799	2451.525136	109.042302	2451.525136	95.519534	2451.525136	186.546535	2451.525136	108.039285	2451.525136	80.325255	2451.525136	186.546535	2451.525136	179.228165
2453.453952	103.740635	2453.453952	101.927579	2453.453952	109.03982	2453.453952	95.52274	2453.453952	186.55392	2453.453952	108.044638	2453.453952	80.33071	2453.453952	186.55392	2453.453952	179.222971
2455.382768	103.750897	2455.382768	101.922836	2455.382768	109.035079	2455.382768	95.526404	2455.382768	186.563436	2455.382768	108.057556	2455.382768	80.334401	2455.382768	186.563436	2455.382768	179.224861
2457.311584	103.763541	2457.311584	101.922635	2457.311584	109.024237	2457.311584	95.521517	2457.311584	186.575235	2457.311584	108.074834	2457.311584	80.340558	2457.311584	186.575235	2457.311584	179.232105
2459.2404	103.774025	2459.2404	101.927877	2459.2404	108.990518	2459.2404	95.521492	2459.2404	186.585356	2459.2404	108.090981	2459.2404	80.348267	2459.2404	186.585356	2459.2404	179.23644
2461.169216	103.7762	2461.169216	101.938068	2461.169216	108.958607	2461.169216	95.524435	2461.169216	186.593147	2461.169216	108.101538	2461.169216	80.354179	2461.169216	186.593147	2461.169216	179.235216
2463.098032	103.773256	2463.098032	101.949549	2463.098032	108.92305	2463.098032	95.52258	2463.098032	186.60096	2463.098032	108.106291	2463.098032	80.357826	2463.098032	186.60096	2463.098032	179.231071
2465.026848	103.767656	2465.026848	101.959784	2465.026848	108.897387	2465.026848	95.525538	2465.026848	186.615253	2465.026848	108.106649	2465.026848	80.364245	2465.026848	186.615253	2465.026848	179.225693
2466.955664	103.764982	2466.955664	101.967733	2466.955664	108.882429	2466.955664	95.530461	2466.955664	186.633157	2466.955664	108.108793	2466.955664	80.374989	2466.955664	186.633157	2466.955664	179.221394
2468.88448	103.767405	2468.88448	101.973631	2468.88448	108.863191	2468.88448	95.537908	2468.88448	186.646775	2468.88448	108.11526	2468.88448	80.381932	2468.88448	186.646775	2468.88448	179.216653
2470.813296	103.771081	2470.813296	101.987746	2470.813296	108.88265	2470.813296	95.545887	2470.813296	186.65912	2470.813296	108.125592	2470.813296	80.384744	2470.813296	186.65912	2470.813296	179.213109
2472.742112	103.775472	2472.742112	102.004214	2472.742112	108.934576	2472.742112	95.550334	2472.742112	186.672873	2472.742112	108.139188	2472.742112	80.389755	2472.742112	186.672873	2472.742112	179.211131
2474.670928	103.779814	2474.670928	102.019523	2474.670928	109.000472	2474.670928	95.558788	2474.670928	186.688333	2474.670928	108.15597	2474.670928	80.396014	2474.670928	186.688333	2474.670928	179.211491
2476.599744	103.779751	2476.599744	102.029287	2476.599744	109.065105	2476.599744	95.564921	2476.599744	186.702806	2476.599744	108.171409	2476.599744	80.403689	2476.599744	186.702806	2476.599744	179.211625
2478.52856	103.777553	2478.52856	102.032226	2478.52856	109.116598	2478.52856	95.573322	2478.52856	186.714386	2478.52856	108.183674	2478.52856	80.409639	2478.52856	186.714386	2478.52856	179.209151
2480.457376	103.77682	2480.457376	102.029416	2480.457376	109.167061	2480.457376	95.574831	2480.457376	186.725439	2480.457376	108.19199	2480.457376	80.417249	2480.457376	186.725439	2480.457376	179.205675
2482.386192	103.776174	2482.386192	102.01803	2482.386192	109.190966	2482.386192	95.574321	2482.386192	186.739149	2482.386192	108.195203	2482.386192	80.4225	2482.386192	186.739149	2482.386192	179.206566
2484.315008	103.776653	2484.315008	102.010429	2484.315008	109.181649	2484.315008	95.579858	2484.315008	186.755912	2484.315008	108.195887	2484.315008	80.422365	2484.315008	186.755912	2484.315008	179.207637
2486.243824	103.778841	2486.243824	101.996533	2486.243824	109.14037	2486.243824	95.580694	2486.243824	186.772276	2486.243824	108.198787	2486.243824	80.424839	2486.243824	186.772276	2486.243824	179.204185
2488.17264	103.783366	2488.17264	101.981573	2488.17264	109.0973	2488.17264	95.577806	2488.17264	186.78733	2488.17264	108.20606	2488.17264	80.43076	2488.17264	186.78733	2488.17264	179.203141
2490.101456	103.790663	2490.101456	101.96771	2490.101456	109.082555	2490.101456	95.570385	2490.101456	186.804274	2490.101456	108.217685	2490.101456	80.436949	2490.101456	186.804274	2490.101456	179.202139
2492.030272	103.795397	2492.030272	101.955405	2492.030272	109.069125	2492.030272	95.566557	2492.030272	186.821341	2492.030272	108.231145	2492.030272	80.441442	2492.030272	186.821341	2492.030272	179.194757
2493.959088	103.795597	2493.959088	101.950881	2493.959088	109.051054	2493.959088	95.570287	2493.959088	186.833407	2493.959088	108.242956	2493.959088	80.441812	2493.959088	186.833407	2493.959088	179.181055
2495.887904	103.790849	2495.887904	101.957717	2495.887904	109.052764	2495.887904	95.570296	2495.887904	186.842401	2495.887904	108.252506	2495.887904	80.444799	2495.887904	186.842401	2495.887904	179.168412
2497.81672	103.781447	2497.81672	101.979346	2497.81672	109.078934	2497.81672	95.571889	2497.81672	186.856624	2497.81672	108.258223	2497.81672	80.445902	2497.81672	186.856624	2497.81672	179.166461
2499.745536	103.771183	2499.745536	102.00885	2499.745536	109.113077	2499.745536	95.569326	2499.745536	186.87345	2499.745536	108.259811	2499.745536	80.444197	2499.745536	186.87345	2499.745536	179.171855
2501.674352	103.765594	2501.674352	102.042058	2501.674352	109.120142	2501.674352	95.57294	2501.674352	186.881223	2501.674352	108.259224	2501.674352	80.446016	2501.674352	186.881223	2501.674352	179.178249
2503.603168	103.766821	2503.603168	102.069396	2503.603168	109.116483	2503.603168	95.576518	2503.603168	186.885399	2503.603168	108.260388	2503.603168	80.450453	2503.603168	186.885399	2503.603168	179.179171
2505.531984	103.77457	2505.531984	102.087095	2505.531984	109.122976	2505.531984	95.567347	2505.531984	186.894847	2505.531984	108.268702	2505.531984	80.452682	2505.531984	186.894847	2505.531984	179.172794
2507.4608	103.782602	2507.4608	102.098617	2507.4608	109.146613	2507.4608	95.553005	2507.4608	186.907223	2507.4608	108.281709	2507.4608	80.455763	2507.4608	186.907223	2507.4608	179.162558
2509.389616	103.7885	2509.389616	102.100966	2509.389616	109.149384	2509.389616	95.534874	2509.389616	186.916457	2509.389616	108.298901	2509.389616	80.459813	2509.389616	186.916457	2509.389616	179.153364
2511.318432	103.792546	2511.318432	102.092591	2511.318432	109.10984	2511.318432	95.519984	2511.318432	186.923805	2511.318432	108.316857	2511.318432	80.463694	2511.318432	186.923805	2511.318432	179.149649
2513.247248	103.79246	2513.247248	102.073216	2513.247248	109.077511	2513.247248	95.509401	2513.247248	186.933859	2513.247248	108.332955	2513.247248	80.463078	2513.247248	186.933859	2513.247248	179.152723
2515.176064	103.790264	2515.176064	102.048399	2515.176064	109.074074	2515.176064	95.494129	2515.176064	186.9417	2515.176064	108.343136	2515.176064	80.463188	2515.176064	186.9417	2515.176064	179.159597
2517.10488	103.790039	2517.10488	102.027729	2517.10488	109.067853	2517.10488	95.481505	2517.10488	186.946686	2517.10488	108.348777	2517.10488	80.463775	2517.10488	186.946686	2517.10488	179.158845
2519.033696	103.792006	2519.033696	102.01073	2519.033696	109.039079	2519.033696	95.471336	2519.033696	186.952894	2519.033696	108.353801	2519.033696	80.465037	2519.033696	186.952894	2519.033696	179.149748
2520.962512	103.797298	2520.962512	102.006221	2520.962512	109.001721	2520.962512	95.471591	2520.962512	186.959073	2520.962512	108.361116	2520.962512	80.466201	2520.962512	186.959073	2520.962512	179.13683
2522.891328	103.808202	2522.891328	102.012265	2522.891328	109.013301	2522.891328	95.473012	2522.891328	186.963616	2522.891328	108.37113	2522.891328	80.469245	2522.891328	186.963616	2522.891328	179.125561
2524.820144	103.822337	2524.820144	102.022572	2524.820144	109.063887	2524.820144	95.47808	2524.820144	186.963999	2524.820144	108.383877	2524.820144	80.476766	2524.820144	186.963999	2524.820144	179.12423
2526.74896	103.83529	2526.74896	102.042656	2526.74896	109.11316	2526.74896	95.491895	2526.74896	186.962491	2526.74896	108.399007	2526.74896	80.484649	2526.74896	186.962491	2526.74896	179.129974
2528.677776	103.841836	2528.677776	102.062352	2528.677776	109.147798	2528.677776	95.50539	2528.677776	186.962986	2528.677776	108.413491	2528.677776	80.486522	2528.677776	186.962986	2528.677776	179.130207
2530.606592	103.83851	2530.606592	102.08093	2530.606592	109.185382	2530.606592	95.520668	2530.606592	186.969137	2530.606592	108.423561	2530.606592	80.487028	2530.606592	186.969137	2530.606592	179.122015
2532.535408	103.829617	2532.535408	102.093548	2532.535408	109.256511	2532.535408	95.529041	2532.535408	186.978004	2532.535408	108.428136	2532.535408	80.488145	2532.535408	186.978004	2532.535408	179.111294
2534.464224	103.817991	2534.464224	102.111069	2534.464224	109.311761	2534.464224	95.536441	2534.464224	186.981998	2534.464224	108.429027	2534.464224	80.493177	2534.464224	186.981998	2534.464224	179.100816
2536.39304	103.810019	2536.39304	102.130425	2536.39304	109.307227	2536.39304	95.547249	2536.39304	186.980306	2536.39304	108.429877	2536.39304	80.496791	2536.39304	186.980306	2536.39304	179.095309
2538.321856	103.809673	2538.321856	102.143165	2538.321856	109.284505	2538.321856	95.551195	2538.321856	186.979288	2538.321856	108.432613	2538.321856	80.501179	2538.321856	186.979288	2538.321856	179.096988
2540.250672	103.818555	2540.250672	102.154103	2540.250672	109.278885	2540.250672	95.552522	2540.250672	186.984839	2540.250672	108.438068	2540.250672	80.510765	2540.250672	186.984839	2540.250672	179.102379
2542.179488	103.835532	2542.179488	102.163258	2542.179488	109.29256	2542.179488	95.546542	2542.179488	186.992672	2542.179488	108.445797	2542.179488	80.517648	2542.179488	186.992672	2542.179488	179.102278
2544.108304	103.855182	2544.108304	102.174353	2544.108304	109.280872	2544.108304	95.543666	2544.108304	186.99795	2544.108304	108.454797	2544.108304	80.522423	2544.108304	186.99795	2544.108304	179.093404
2546.03712	103.872067	2546.03712	102.179076	2546.03712	109.245305	2546.03712	95.54234	2546.03712	187.003106	2546.03712	108.463024	2546.03712	80.527165	2546.03712	187.003106	2546.03712	179.081261
2547.965936	103.883543	2547.965936	102.176997	2547.965936	109.237046	2547.965936	95.52952	2547.965936	187.009352	2547.965936	108.4683	2547.965936	80.530326	2547.965936	187.009352	2547.965936	179.067895
2549.894752	103.885414	2549.894752	102.165222	2549.894752	109.257558	2549.894752	95.521169	2549.894752	187.014066	2549.894752	108.469665	2549.894752	80.537515	2549.894752	187.014066	2549.894752	179.054655
2551.823568	103.878078	2551.823568	102.147133	2551.823568	109.275405	2551.823568	95.520349	2551.823568	187.01496	2551.823568	108.469986	2551.823568	80.544355	2551.823568	187.01496	2551.823568	179.047945
2553.752384	103.865521	2553.752384	102.129155	2553.752384	109.254955	2553.752384	95.530989	2553.752384	187.014695	2553.752384	108.471682	2553.752384	80.551887	2553.752384	187.014695	2553.752384	179.049017
2555.6812	103.853785	2555.6812	102.111875	2555.6812	109.221899	2555.6812	95.549112	2555.6812	187.019284	2555.6812	108.476149	2555.6812	80.56092	2555.6812	187.019284	2555.6812	179.048728
2557.610016	103.85245	2557.610016	102.105759	2557.610016	109.228296	2557.610016	95.561616	2557.610016	187.025231	2557.610016	108.483297	2557.610016	80.568042	2557.610016	187.025231	2557.610016	179.041978
2559.538832	103.862815	2559.538832	102.110253	2559.538832	109.248704	2559.538832	95.575406	2559.538832	187.029825	2559.538832	108.491348	2559.538832	80.572494	2559.538832	187.029825	2559.538832	179.035735
2561.467648	103.879167	2561.467648	102.125708	2561.467648	109.247497	2561.467648	95.591435	2561.467648	187.037132	2561.467648	108.497214	2561.467648	80.573969	2561.467648	187.037132	2561.467648	179.029603
2563.396464	103.899648	2563.396464	102.150877	2563.396464	109.228712	2563.396464	95.613742	2563.396464	187.048869	2563.396464	108.498567	2563.396464	80.572684	2563.396464	187.048869	2563.396464	179.026316
2565.32528	103.915435	2565.32528	102.17165	2565.32528	109.24266	2565.32528	95.631269	2565.32528	187.06257	2565.32528	108.497375	2565.32528	80.573448	2565.32528	187.06257	2565.32528	179.028488
2567.254096	103.922402	2567.254096	102.188601	2567.254096	109.300847	2567.254096	95.640788	2567.254096	187.071784	2567.254096	108.498909	2567.254096	80.574488	2567.254096	187.071784	2567.254096	179.034663
2569.182912	103.923365	2569.182912	102.203803	2569.182912	109.3436	2569.182912	95.649755	2569.182912	187.079075	2569.182912	108.504994	2569.182912	80.577579	2569.182912	187.079075	2569.182912	179.03471
2571.111728	103.919206	2571.111728	102.217608	2571.111728	109.346135	2571.111728	95.65633	2571.111728	187.088125	2571.111728	108.51175	2571.111728	80.579896	2571.111728	187.088125	2571.111728	179.028528
2573.040544	103.912923	2573.040544	102.228506	2573.040544	109.341329	2573.040544	95.668162	2573.040544	187.097274	2573.040544	108.518375	2573.040544	80.583305	2573.040544	187.097274	2573.040544	179.018667
2574.96936	103.909565	2574.96936	102.233532	2574.96936	109.363281	2574.96936	95.674676	2574.96936	187.106852	2574.96936	108.523867	2574.96936	80.584399	2574.96936	187.106852	2574.96936	179.008934
2576.898176	103.909806	2576.898176	102.242925	2576.898176	109.384031	2576.898176	95.676777	2576.898176	187.116845	2576.898176	108.528058	2576.898176	80.581967	2576.898176	187.116845	2576.898176	179.003853
2578.826992	103.916568	2578.826992	102.255918	2578.826992	109.36552	2578.826992	95.68144	2578.826992	187.127982	2578.826992	108.532401	2578.826992	80.580706	2578.826992	187.127982	2578.826992	179.0054
2580.755808	103.926495	2580.755808	102.269427	2580.755808	109.339411	2580.755808	95.686303	2580.755808	187.139446	2580.755808	108.538887	2580.755808	80.582084	2580.755808	187.139446	2580.755808	179.012304
2582.684624	103.938469	2582.684624	102.284334	2582.684624	109.343791	2582.684624	95.692555	2582.684624	187.150558	2582.684624	108.55005	2582.684624	80.585207	2582.684624	187.150558	2582.684624	179.016068
2584.61344	103.950024	2584.61344	102.295521	2584.61344	109.386122	2584.61344	95.690557	2584.61344	187.161933	2584.61344	108.561935	2584.61344	80.588382	2584.61344	187.161933	2584.61344	179.010349
2586.542256	103.954374	2586.542256	102.300733	2586.542256	109.42273	2586.542256	95.688588	2586.542256	187.171998	2586.542256	108.57176	2586.542256	80.58995	2586.542256	187.171998	2586.542256	179.001014
2588.471072	103.952318	2588.471072	102.290319	2588.471072	109.42938	2588.471072	95.692986	2588.471072	187.181523	2588.471072	108.577182	2588.471072	80.596564	2588.471072	187.181523	2588.471072	178.989509
2590.399888	103.946512	2590.399888	102.273266	2590.399888	109.447595	2590.399888	95.694726	2590.399888	187.190051	2590.399888	108.5804	2590.399888	80.603251	2590.399888	187.190051	2590.399888	178.983176
2592.328704	103.937399	2592.328704	102.25118	2592.328704	109.486828	2592.328704	95.70152	2592.328704	187.198014	2592.328704	108.584156	2592.328704	80.609919	2592.328704	187.198014	2592.328704	178.984912
2594.25752	103.930986	2594.25752	102.228601	2594.25752	109.513179	2594.25752	95.708302	2594.25752	187.207345	2594.25752	108.591037	2594.25752	80.616644	2594.25752	187.207345	2594.25752	178.986811
2596.186336	103.928616	2596.186336	102.211048	2596.186336	109.493915	2596.186336	95.714942	2596.186336	187.219273	2596.186336	108.600255	2596.186336	80.621186	2596.186336	187.219273	2596.186336	178.98174
2598.115152	103.927797	2598.115152	102.200563	2598.115152	109.457059	2598.115152	95.71822	2598.115152	187.234598	2598.115152	108.612474	2598.115152	80.628469	2598.115152	187.234598	2598.115152	178.969413
2600.043968	103.928624	2600.043968	102.20194	2600.043968	109.453246	2600.043968	95.708519	2600.043968	187.245324	2600.043968	108.625185	2600.043968	80.638365	2600.043968	187.245324	2600.043968	178.952496
2601.972784	103.929113	2601.972784	102.209393	2601.972784	109.445182	2601.972784	95.697227	2601.972784	187.248441	2601.972784	108.632939	2601.972784	80.647467	2601.972784	187.248441	2601.972784	178.938896
2603.9016	103.927775	2603.9016	102.223319	2603.9016	109.411526	2603.9016	95.688384	2603.9016	187.251872	2603.9016	108.637243	2603.9016	80.658369	2603.9016	187.251872	2603.9016	178.931946
2605.830416	103.928046	2605.830416	102.238245	2605.830416	109.367148	2605.830416	95.683957	2605.830416	187.25931	2605.830416	108.642913	2605.830416	80.664585	2605.830416	187.25931	2605.830416	178.929537
2607.759232	103.926601	2607.759232	102.250453	2607.759232	109.346248	2607.759232	95.679131	2607.759232	187.268758	2607.759232	108.650057	2607.759232	80.669257	2607.759232	187.268758	2607.759232	178.930869
2609.688048	103.925259	2609.688048	102.263058	2609.688048	109.366987	2609.688048	95.671478	2609.688048	187.277698	2609.688048	108.65941	2609.688048	80.672493	2609.688048	187.277698	2609.688048	178.93114
2611.616864	103.92669	2611.616864	102.277821	2611.616864	109.373308	2611.616864	95.670362	2611.616864	187.287545	2611.616864	108.670636	2611.616864	80.675177	2611.616864	187.287545	2611.616864	178.925329
2613.54568	103.930945	2613.54568	102.300374	2613.54568	109.354934	2613.54568	95.673201	2613.54568	187.298447	2613.54568	108.68259	2613.54568	80.679079	2613.54568	187.298447	2613.54568	178.914617
2615.474496	103.94097	2615.474496	102.324333	2615.474496	109.361116	2615.474496	95.681	2615.474496	187.3062	2615.474496	108.6926	2615.474496	80.681538	2615.474496	187.3062	2615.474496	178.905486
2617.403312	103.954395	2617.403312	102.346427	2617.403312	109.415241	2617.403312	95.683501	2617.403312	187.313709	2617.403312	108.698914	2617.403312	80.682975	2617.403312	187.313709	2617.403312	178.902118
2619.332128	103.963997	2619.332128	102.365261	2619.332128	109.485328	2619.332128	95.681259	2619.332128	187.32225	2619.332128	108.703902	2619.332128	80.684955	2619.332128	187.32225	2619.332128	178.902847
2621.260944	103.970512	2621.260944	102.374445	2621.260944	109.507143	2621.260944	95.684802	2621.260944	187.332441	2621.260944	108.710784	2621.260944	80.686391	2621.260944	187.332441	2621.260944	178.906272
2623.18976	103.972698	2623.18976	102.377109	2623.18976	109.514999	2623.18976	95.686062	2623.18976	187.341677	2623.18976	108.720518	2623.18976	80.689283	2623.18976	187.341677	2623.18976	178.906863
2625.118576	103.972168	2625.118576	102.373573	2625.118576	109.544836	2625.118576	95.686099	2625.118576	187.344756	2625.118576	108.733408	2625.118576	80.692929	2625.118576	187.344756	2625.118576	178.898449
2627.047392	103.972892	2627.047392	102.364359	2627.047392	109.572176	2627.047392	95.680798	2627.047392	187.347418	2627.047392	108.745281	2627.047392	80.700069	2627.047392	187.347418	2627.047392	178.884806
2628.976208	103.976583	2628.976208	102.347425	2628.976208	109.57109	2628.976208	95.675311	2628.976208	187.352161	2628.976208	108.752964	2628.976208	80.705485	2628.976208	187.352161	2628.976208	178.876014
2630.905024	103.984127	2630.905024	102.323788	2630.905024	109.532635	2630.905024	95.675608	2630.905024	187.359313	2630.905024	108.756504	2630.905024	80.709001	2630.905024	187.359313	2630.905024	178.871182
2632.83384	103.991866	2632.83384	102.308197	2632.83384	109.506587	2632.83384	95.673395	2632.83384	187.365595	2632.83384	108.758297	2632.83384	80.711145	2632.83384	187.365595	2632.83384	178.871177
2634.762656	103.995972	2634.762656	102.30396	2634.762656	109.52227	2634.762656	95.671019	2634.762656	187.369309	2634.762656	108.762233	2634.762656	80.714153	2634.762656	187.369309	2634.762656	178.876884
2636.691472	103.997949	2636.691472	102.311953	2636.691472	109.543916	2636.691472	95.660881	2636.691472	187.375041	2636.691472	108.770167	2636.691472	80.717833	2636.691472	187.375041	2636.691472	178.879452
2638.620288	103.993511	2638.620288	102.330236	2638.620288	109.54634	2638.620288	95.649473	2638.620288	187.381389	2638.620288	108.78216	2638.620288	80.720383	2638.620288	187.381389	2638.620288	178.875699
2640.549104	103.983396	2640.549104	102.351885	2640.549104	109.544732	2640.549104	95.642354	2640.549104	187.384573	2640.549104	108.79584	2640.549104	80.723607	2640.549104	187.384573	2640.549104	178.865371
2642.47792	103.973547	2642.47792	102.37356	2642.47792	109.579949	2642.47792	95.633422	2642.47792	187.384709	2642.47792	108.805866	2642.47792	80.731267	2642.47792	187.384709	2642.47792	178.854021
2644.406736	103.968035	2644.406736	102.387031	2644.406736	109.616137	2644.406736	95.632483	2644.406736	187.387583	2644.406736	108.811234	2644.406736	80.733754	2644.406736	187.387583	2644.406736	178.843943
2646.335552	103.9685	2646.335552	102.396328	2646.335552	109.604394	2646.335552	95.64008	2646.335552	187.39509	2646.335552	108.813953	2646.335552	80.736108	2646.335552	187.39509	2646.335552	178.841155
2648.264368	103.979519	2648.264368	102.40499	2648.264368	109.573036	2648.264368	95.652596	2648.264368	187.402553	2648.264368	108.816331	2648.264368	80.740645	2648.264368	187.402553	2648.264368	178.846486
2650.193184	103.996	2650.193184	102.415382	2650.193184	109.558743	2650.193184	95.663622	2650.193184	187.408094	2650.193184	108.822154	2650.193184	80.743063	2650.193184	187.408094	2650.193184	178.845697
2652.122	104.01168	2652.122	102.426882	2652.122	109.565431	2652.122	95.669645	2652.122	187.411296	2652.122	108.830458	2652.122	80.743498	2652.122	187.411296	2652.122	178.835422
2654.050816	104.02217	2654.050816	102.437162	2654.050816	109.563005	2654.050816	95.677658	2654.050816	187.414337	2654.050816	108.83864	2654.050816	80.74251	2654.050816	187.414337	2654.050816	178.821277
2655.979632	104.022381	2655.979632	102.445882	2655.979632	109.547526	2655.979632	95.678546	2655.979632	187.418233	2655.979632	108.846558	2655.979632	80.742165	2655.979632	187.418233	2655.979632	178.80962
2657.908448	104.012246	2657.908448	102.449894	2657.908448	109.55563	2657.908448	95.67711	2657.908448	187.420124	2657.908448	108.854798	2657.908448	80.742835	2657.908448	187.420124	2657.908448	178.799274
2659.837264	103.993596	2659.837264	102.452718	2659.837264	109.589555	2659.837264	95.670839	2659.837264	187.423717	2659.837264	108.864517	2659.837264	80.738984	2659.837264	187.423717	2659.837264	178.793806
2661.76608	103.974225	2661.76608	102.446292	2661.76608	109.615553	2661.76608	95.661681	2661.76608	187.432382	2661.76608	108.873112	2661.76608	80.74043	2661.76608	187.432382	2661.76608	178.790461
2663.694896	103.962886	2663.694896	102.432104	2663.694896	109.588829	2663.694896	95.66045	2663.694896	187.443328	2663.694896	108.88032	2663.694896	80.744854	2663.694896	187.443328	2663.694896	178.782915
2665.623712	103.962188	2665.623712	102.412634	2665.623712	109.546447	2665.623712	95.658197	2665.623712	187.450173	2665.623712	108.886966	2665.623712	80.745554	2665.623712	187.450173	2665.623712	178.771715
2667.552528	103.970933	2667.552528	102.388929	2667.552528	109.539168	2667.552528	95.652779	2667.552528	187.451616	2667.552528	108.893729	2667.552528	80.74452	2667.552528	187.451616	2667.552528	178.756673
2669.481344	103.982657	2669.481344	102.364443	2669.481344	109.545125	2669.481344	95.648927	2669.481344	187.454257	2669.481344	108.899016	2669.481344	80.74614	2669.481344	187.454257	2669.481344	178.743442
2671.41016	103.990451	2671.41016	102.344765	2671.41016	109.534375	2671.41016	95.649887	2671.41016	187.459242	2671.41016	108.903082	2671.41016	80.753948	2671.41016	187.459242	2671.41016	178.736654
2673.338976	103.99226	2673.338976	102.334412	2673.338976	109.513683	2673.338976	95.662136	2673.338976	187.465284	2673.338976	108.905752	2673.338976	80.761138	2673.338976	187.465284	2673.338976	178.739165
2675.267792	103.986579	2675.267792	102.343383	2675.267792	109.534445	2675.267792	95.675716	2675.267792	187.473736	2675.267792	108.910212	2675.267792	80.761599	2675.267792	187.473736	2675.267792	178.746079
2677.196608	103.973416	2677.196608	102.365772	2677.196608	109.598539	2677.196608	95.689498	2677.196608	187.480223	2677.196608	108.918341	2677.196608	80.762325	2677.196608	187.480223	2677.196608	178.745337
2679.125424	103.958563	2679.125424	102.401829	2679.125424	109.648596	2679.125424	95.701283	2679.125424	187.483964	2679.125424	108.927024	2679.125424	80.766139	2679.125424	187.483964	2679.125424	178.737291
2681.05424	103.943851	2681.05424	102.444074	2681.05424	109.670114	2681.05424	95.715888	2681.05424	187.487473	2681.05424	108.933171	2681.05424	80.7704	2681.05424	187.487473	2681.05424	178.724413
2682.983056	103.937917	2682.983056	102.481768	2682.983056	109.68625	2682.983056	95.735944	2682.983056	187.491445	2682.983056	108.938394	2682.983056	80.77001	2682.983056	187.491445	2682.983056	178.71174
2684.911872	103.944543	2684.911872	102.510898	2684.911872	109.733694	2684.911872	95.748937	2684.911872	187.49686	2684.911872	108.944982	2684.911872	80.775277	2684.911872	187.49686	2684.911872	178.701513
2686.840688	103.958702	2686.840688	102.526866	2686.840688	109.776342	2686.840688	95.75494	2686.840688	187.50344	2686.840688	108.951036	2686.840688	80.783951	2686.840688	187.50344	2686.840688	178.692904
2688.769504	103.977425	2688.769504	102.5288	2688.769504	109.768269	2688.769504	95.756084	2688.769504	187.51204	2688.769504	108.95553	2688.769504	80.786883	2688.769504	187.51204	2688.769504	178.682737
2690.69832	103.994442	2690.69832	102.518228	2690.69832	109.740616	2690.69832	95.755146	2690.69832	187.51986	2690.69832	108.960192	2690.69832	80.789164	2690.69832	187.51986	2690.69832	178.671308
2692.627136	104.001931	2692.627136	102.499642	2692.627136	109.719377	2692.627136	95.752552	2692.627136	187.527158	2692.627136	108.966446	2692.627136	80.795232	2692.627136	187.527158	2692.627136	178.659336
2694.555952	104.00012	2694.555952	102.471903	2694.555952	109.709448	2694.555952	95.739756	2694.555952	187.536212	2694.555952	108.972447	2694.555952	80.802772	2694.555952	187.536212	2694.555952	178.647696
2696.484768	103.989853	2696.484768	102.43907	2696.484768	109.677942	2696.484768	95.729316	2696.484768	187.54722	2696.484768	108.978095	2696.484768	80.806785	2696.484768	187.54722	2696.484768	178.635599
2698.413584	103.975545	2698.413584	102.413428	2698.413584	109.624701	2698.413584	95.722919	2698.413584	187.555571	2698.413584	108.985569	2698.413584	80.803722	2698.413584	187.555571	2698.413584	178.627748
2700.3424	103.964264	2700.3424	102.395743	2700.3424	109.61142	2700.3424	95.724312	2700.3424	187.559515	2700.3424	108.993079	2700.3424	80.805115	2700.3424	187.559515	2700.3424	178.626296
2702.271216	103.958051	2702.271216	102.394144	2702.271216	109.637442	2702.271216	95.72588	2702.271216	187.566536	2702.271216	109.000005	2702.271216	80.80824	2702.271216	187.566536	2702.271216	178.62891
2704.200032	103.957454	2704.200032	102.401377	2704.200032	109.66557	2704.200032	95.727716	2704.200032	187.578269	2704.200032	109.00778	2704.200032	80.808035	2704.200032	187.578269	2704.200032	178.626278
2706.128848	103.961015	2706.128848	102.423029	2706.128848	109.667179	2706.128848	95.737898	2706.128848	187.587829	2706.128848	109.016689	2706.128848	80.808462	2706.128848	187.587829	2706.128848	178.618788
2708.057664	103.964618	2708.057664	102.450107	2708.057664	109.661808	2708.057664	95.750275	2708.057664	187.596255	2708.057664	109.025053	2708.057664	80.811343	2708.057664	187.596255	2708.057664	178.61094
2709.98648	103.966847	2709.98648	102.479447	2709.98648	109.693274	2709.98648	95.761074	2709.98648	187.604604	2709.98648	109.032378	2709.98648	80.816312	2709.98648	187.604604	2709.98648	178.602609
2711.915296	103.964592	2711.915296	102.505288	2711.915296	109.722843	2711.915296	95.77296	2711.915296	187.614201	2711.915296	109.039019	2711.915296	80.817152	2711.915296	187.614201	2711.915296	178.593322
2713.844112	103.961431	2713.844112	102.522409	2713.844112	109.718157	2713.844112	95.782876	2713.844112	187.620666	2713.844112	109.046612	2713.844112	80.815034	2713.844112	187.620666	2713.844112	178.587921
2715.772928	103.962925	2715.772928	102.525839	2715.772928	109.697502	2715.772928	95.791749	2715.772928	187.625658	2715.772928	109.053688	2715.772928	80.817829	2715.772928	187.625658	2715.772928	178.586884
2717.701744	103.968987	2717.701744	102.520183	2717.701744	109.691892	2717.701744	95.790906	2717.701744	187.634545	2717.701744	109.05941	2717.701744	80.817597	2717.701744	187.634545	2717.701744	178.584516
2719.63056	103.979533	2719.63056	102.510419	2719.63056	109.7109	2719.63056	95.78185	2719.63056	187.643238	2719.63056	109.063561	2719.63056	80.815426	2719.63056	187.643238	2719.63056	178.576914
2721.559376	103.995684	2721.559376	102.495612	2721.559376	109.709166	2721.559376	95.768856	2721.559376	187.651251	2721.559376	109.067182	2721.559376	80.817601	2721.559376	187.651251	2721.559376	178.568852
2723.488192	104.012754	2723.488192	102.481698	2723.488192	109.682526	2723.488192	95.758891	2723.488192	187.658053	2723.488192	109.068749	2723.488192	80.821499	2723.488192	187.658053	2723.488192	178.562073
2725.417008	104.025409	2725.417008	102.475835	2725.417008	109.670764	2725.417008	95.756004	2725.417008	187.663619	2725.417008	109.068769	2725.417008	80.821462	2725.417008	187.663619	2725.417008	178.556439
2727.345824	104.027999	2727.345824	102.477646	2727.345824	109.689385	2727.345824	95.74753	2727.345824	187.67156	2727.345824	109.072325	2727.345824	80.820959	2727.345824	187.67156	2727.345824	178.553083
2729.27464	104.017954	2729.27464	102.486526	2729.27464	109.718541	2729.27464	95.738243	2729.27464	187.679857	2729.27464	109.080754	2729.27464	80.824839	2729.27464	187.679857	2729.27464	178.549442
2731.203456	104.000288	2731.203456	102.508099	2731.203456	109.721202	2731.203456	95.733286	2731.203456	187.685016	2731.203456	109.092433	2731.203456	80.832108	2731.203456	187.685016	2731.203456	178.538069
2733.132272	103.983456	2733.132272	102.535044	2733.132272	109.731809	2733.132272	95.735614	2733.132272	187.68693	2733.132272	109.102312	2733.132272	80.834589	2733.132272	187.68693	2733.132272	178.524714
2735.061088	103.971742	2735.061088	102.561217	2735.061088	109.789264	2735.061088	95.745011	2735.061088	187.690163	2735.061088	109.106453	2735.061088	80.835414	2735.061088	187.690163	2735.061088	178.511152
2736.989904	103.968028	2736.989904	102.582872	2736.989904	109.852418	2736.989904	95.748657	2736.989904	187.698774	2736.989904	109.107662	2736.989904	80.838677	2736.989904	187.698774	2736.989904	178.497856
2738.91872	103.971277	2738.91872	102.598468	2738.91872	109.881469	2738.91872	95.750915	2738.91872	187.708683	2738.91872	109.108826	2738.91872	80.846987	2738.91872	187.708683	2738.91872	178.49069
2740.847536	103.981266	2740.847536	102.606934	2740.847536	109.87742	2740.847536	95.753672	2740.847536	187.715167	2740.847536	109.111116	2740.847536	80.853704	2740.847536	187.715167	2740.847536	178.491292
2742.776352	103.994292	2742.776352	102.605066	2742.776352	109.881177	2742.776352	95.757871	2742.776352	187.719526	2742.776352	109.116168	2742.776352	80.859205	2742.776352	187.719526	2742.776352	178.496258
2744.705168	104.00386	2744.705168	102.596369	2744.705168	109.896648	2744.705168	95.756048	2744.705168	187.727232	2744.705168	109.124432	2744.705168	80.867829	2744.705168	187.727232	2744.705168	178.495438
2746.633984	104.008741	2746.633984	102.574841	2746.633984	109.889265	2746.633984	95.741062	2746.633984	187.736973	2746.633984	109.135318	2746.633984	80.871185	2746.633984	187.736973	2746.633984	178.48955
2748.5628	104.00933	2748.5628	102.550606	2748.5628	109.844565	2748.5628	95.725001	2748.5628	187.746458	2748.5628	109.148214	2748.5628	80.868301	2748.5628	187.746458	2748.5628	178.48393
2750.491616	104.008041	2750.491616	102.52689	2750.491616	109.792066	2750.491616	95.713149	2750.491616	187.755725	2750.491616	109.159711	2750.491616	80.86841	2750.491616	187.755725	2750.491616	178.477872
2752.420432	104.011225	2752.420432	102.513373	2752.420432	109.776332	2752.420432	95.706877	2752.420432	187.761615	2752.420432	109.168604	2752.420432	80.873305	2752.420432	187.761615	2752.420432	178.47157
2754.349248	104.018803	2754.349248	102.502098	2754.349248	109.778202	2754.349248	95.706587	2754.349248	187.765916	2754.349248	109.175574	2754.349248	80.881247	2754.349248	187.765916	2754.349248	178.469598
2756.278064	104.030765	2756.278064	102.499551	2756.278064	109.750917	2756.278064	95.702011	2756.278064	187.769937	2756.278064	109.182174	2756.278064	80.880167	2756.278064	187.769937	2756.278064	178.467656
2758.20688	104.043718	2758.20688	102.516368	2758.20688	109.719647	2758.20688	95.703579	2758.20688	187.774171	2758.20688	109.188241	2758.20688	80.877699	2758.20688	187.774171	2758.20688	178.458811
2760.135696	104.050326	2760.135696	102.544604	2760.135696	109.716331	2760.135696	95.71041	2760.135696	187.781771	2760.135696	109.194256	2760.135696	80.879585	2760.135696	187.781771	2760.135696	178.448095
2762.064512	104.044249	2762.064512	102.578918	2762.064512	109.750672	2762.064512	95.716038	2762.064512	187.791082	2762.064512	109.201118	2762.064512	80.880059	2762.064512	187.791082	2762.064512	178.438033
2763.993328	104.023298	2763.993328	102.616173	2763.993328	109.78072	2763.993328	95.719032	2763.993328	187.796915	2763.993328	109.209438	2763.993328	80.8788	2763.993328	187.796915	2763.993328	178.429675
2765.922144	103.993487	2765.922144	102.650761	2765.922144	109.794989	2765.922144	95.720452	2765.922144	187.79755	2765.922144	109.219162	2765.922144	80.877787	2765.922144	187.79755	2765.922144	178.424571
2767.85096	103.96545	2767.85096	102.670686	2767.85096	109.82775	2767.85096	95.725361	2767.85096	187.797284	2767.85096	109.226566	2767.85096	80.877806	2767.85096	187.797284	2767.85096	178.417455
2769.779776	103.945841	2769.779776	102.670893	2769.779776	109.87745	2769.779776	95.726554	2769.779776	187.801024	2769.779776	109.229891	2769.779776	80.879403	2769.779776	187.801024	2769.779776	178.409917
2771.708592	103.940503	2771.708592	102.64865	2771.708592	109.916222	2771.708592	95.72891	2771.708592	187.804868	2771.708592	109.232054	2771.708592	80.876983	2771.708592	187.804868	2771.708592	178.399702
2773.637408	103.952821	2773.637408	102.612931	2773.637408	109.919095	2773.637408	95.730284	2773.637408	187.81135	2773.637408	109.23342	2773.637408	80.875456	2773.637408	187.81135	2773.637408	178.386408
2775.566224	103.975485	2775.566224	102.575377	2775.566224	109.901533	2775.566224	95.725944	2775.566224	187.820698	2775.566224	109.234256	2775.566224	80.874924	2775.566224	187.820698	2775.566224	178.37077
2777.49504	104.000304	2777.49504	102.542806	2777.49504	109.90034	2777.49504	95.71876	2777.49504	187.827238	2777.49504	109.235361	2777.49504	80.87415	2777.49504	187.827238	2777.49504	178.357742
2779.423856	104.022634	2779.423856	102.509569	2779.423856	109.895189	2779.423856	95.704677	2779.423856	187.832326	2779.423856	109.237701	2779.423856	80.873199	2779.423856	187.832326	2779.423856	178.351333
2781.352672	104.032674	2781.352672	102.481056	2781.352672	109.873637	2781.352672	95.692684	2781.352672	187.835804	2781.352672	109.2419	2781.352672	80.875367	2781.352672	187.835804	2781.352672	178.349274
2783.281488	104.030401	2783.281488	102.472015	2783.281488	109.841249	2783.281488	95.689618	2783.281488	187.838569	2783.281488	109.247542	2783.281488	80.878979	2783.281488	187.838569	2783.281488	178.344274
2785.210304	104.0164	2785.210304	102.483497	2785.210304	109.830901	2785.210304	95.691181	2785.210304	187.842075	2785.210304	109.251754	2785.210304	80.881566	2785.210304	187.842075	2785.210304	178.336727
2787.13912	103.994041	2787.13912	102.51125	2787.13912	109.856275	2787.13912	95.693234	2787.13912	187.846541	2787.13912	109.253853	2787.13912	80.884039	2787.13912	187.846541	2787.13912	178.331342
2789.067936	103.972357	2789.067936	102.542209	2789.067936	109.874933	2789.067936	95.701005	2789.067936	187.850499	2789.067936	109.254994	2789.067936	80.885083	2789.067936	187.850499	2789.067936	178.327899
2790.996752	103.958969	2790.996752	102.579076	2790.996752	109.881853	2790.996752	95.722485	2790.996752	187.85383	2790.996752	109.255804	2790.996752	80.883996	2790.996752	187.85383	2790.996752	178.322533
2792.925568	103.9521	2792.925568	102.605224	2792.925568	109.89943	2792.925568	95.74734	2792.925568	187.86221	2792.925568	109.257297	2792.925568	80.8825	2792.925568	187.86221	2792.925568	178.316165
2794.854384	103.950542	2794.854384	102.628931	2794.854384	109.932733	2794.854384	95.766712	2794.854384	187.874792	2794.854384	109.261805	2794.854384	80.880412	2794.854384	187.874792	2794.854384	178.312616
2796.7832	103.948394	2796.7832	102.645303	2796.7832	109.959174	2796.7832	95.780043	2796.7832	187.885207	2796.7832	109.271394	2796.7832	80.880978	2796.7832	187.885207	2796.7832	178.31506
2798.712016	103.945763	2798.712016	102.656286	2798.712016	109.949759	2798.712016	95.781386	2798.712016	187.89104	2798.712016	109.283955	2798.712016	80.88176	2798.712016	187.89104	2798.712016	178.314658
2800.640832	103.943806	2800.640832	102.661976	2800.640832	109.9278	2800.640832	95.778376	2800.640832	187.89675	2800.640832	109.294718	2800.640832	80.882224	2800.640832	187.89675	2800.640832	178.304782
2802.569648	103.941099	2802.569648	102.661126	2802.569648	109.914059	2802.569648	95.774945	2802.569648	187.906581	2802.569648	109.304158	2802.569648	80.885875	2802.569648	187.906581	2802.569648	178.289942
2804.498464	103.938545	2804.498464	102.649395	2804.498464	109.902682	2804.498464	95.772978	2804.498464	187.91659	2804.498464	109.312368	2804.498464	80.886091	2804.498464	187.91659	2804.498464	178.273501
2806.42728	103.937015	2806.42728	102.621486	2806.42728	109.87489	2806.42728	95.768766	2806.42728	187.924635	2806.42728	109.318841	2806.42728	80.882061	2806.42728	187.924635	2806.42728	178.260489
2808.356096	103.940422	2808.356096	102.593289	2808.356096	109.828385	2808.356096	95.763496	2808.356096	187.930512	2808.356096	109.326782	2808.356096	80.883965	2808.356096	187.930512	2808.356096	178.251067
2810.284912	103.95332	2810.284912	102.56832	2810.284912	109.799194	2810.284912	95.766049	2810.284912	187.934986	2810.284912	109.338791	2810.284912	80.887188	2810.284912	187.934986	2810.284912	178.243849
2812.213728	103.967828	2812.213728	102.549928	2812.213728	109.795886	2812.213728	95.765974	2812.213728	187.941759	2812.213728	109.353962	2812.213728	80.891755	2812.213728	187.941759	2812.213728	178.23806
2814.142544	103.976014	2814.142544	102.535358	2814.142544	109.798286	2814.142544	95.765823	2814.142544	187.949789	2814.142544	109.368387	2814.142544	80.891277	2814.142544	187.949789	2814.142544	178.228825
2816.07136	103.975956	2816.07136	102.529899	2816.07136	109.80246	2816.07136	95.764718	2816.07136	187.957668	2816.07136	109.376436	2816.07136	80.891503	2816.07136	187.957668	2816.07136	178.213726
2818.000176	103.96751	2818.000176	102.537322	2818.000176	109.819499	2818.000176	95.757513	2818.000176	187.963531	2818.000176	109.371355	2818.000176	80.897665	2818.000176	187.963531	2818.000176	178.198708
2819.928992	103.951158	2819.928992	102.552637	2819.928992	109.862686	2819.928992	95.755355	2819.928992	187.969302	2819.928992	109.354589	2819.928992	80.903656	2819.928992	187.969302	2819.928992	178.192252
2821.857808	103.929086	2821.857808	102.57487	2821.857808	109.903948	2821.857808	95.754619	2821.857808	187.97515	2821.857808	109.327928	2821.857808	80.90828	2821.857808	187.97515	2821.857808	178.195472
2823.786624	103.902189	2823.786624	102.597284	2823.786624	109.925004	2823.786624	95.755419	2823.786624	187.974866	2823.786624	109.292381	2823.786624	80.912797	2823.786624	187.974866	2823.786624	178.195108
2825.71544	103.877191	2825.71544	102.617871	2825.71544	109.93463	2825.71544	95.757228	2825.71544	187.971255	2825.71544	109.254548	2825.71544	80.907204	2825.71544	187.971255	2825.71544	178.182892
2827.644256	103.854465	2827.644256	102.631698	2827.644256	109.933648	2827.644256	95.753659	2827.644256	187.965622	2827.644256	109.219005	2827.644256	80.881724	2827.644256	187.965622	2827.644256	178.164148
2829.573072	103.827342	2829.573072	102.630026	2829.573072	109.929232	2829.573072	95.74125	2829.573072	187.954106	2829.573072	109.185619	2829.573072	80.831151	2829.573072	187.954106	2829.573072	178.145346
2831.501888	103.794925	2831.501888	102.612057	2831.501888	109.905562	2831.501888	95.71466	2831.501888	187.93456	2831.501888	109.1538	2831.501888	80.76618	2831.501888	187.93456	2831.501888	178.1309
2833.430704	103.756681	2833.430704	102.592303	2833.430704	109.864843	2833.430704	95.677924	2833.430704	187.910825	2833.430704	109.124492	2833.430704	80.695982	2833.430704	187.910825	2833.430704	178.123607
2835.35952	103.710848	2835.35952	102.572793	2835.35952	109.830214	2835.35952	95.629882	2835.35952	187.892359	2835.35952	109.093043	2835.35952	80.620032	2835.35952	187.892359	2835.35952	178.117946
2837.288336	103.659301	2837.288336	102.560197	2837.288336	109.801031	2837.288336	95.566558	2837.288336	187.877022	2837.288336	109.056875	2837.288336	80.542244	2837.288336	187.877022	2837.288336	178.107505
2839.217152	103.607973	2839.217152	102.544082	2839.217152	109.776252	2839.217152	95.495982	2839.217152	187.859326	2839.217152	109.019102	2839.217152	80.470408	2839.217152	187.859326	2839.217152	178.088638
2841.145968	103.564259	2841.145968	102.529089	2841.145968	109.730861	2841.145968	95.426986	2841.145968	187.842898	2841.145968	108.98531	2841.145968	80.40729	2841.145968	187.842898	2841.145968	178.060466
2843.074784	103.527556	2843.074784	102.511015	2843.074784	109.681757	2843.074784	95.36964	2843.074784	187.82886	2843.074784	108.960339	2843.074784	80.349448	2843.074784	187.82886	2843.074784	178.02732
2845.0036	103.497015	2845.0036	102.486791	2845.0036	109.641819	2845.0036	95.322534	2845.0036	187.817264	2845.0036	108.945242	2845.0036	80.302535	2845.0036	187.817264	2845.0036	178.001582
2846.932416	103.471604	2846.932416	102.453225	2846.932416	109.588266	2846.932416	95.277195	2846.932416	187.80693	2846.932416	108.936068	2846.932416	80.267288	2846.932416	187.80693	2846.932416	177.985792
2848.861232	103.446668	2848.861232	102.411992	2848.861232	109.536474	2848.861232	95.231678	2848.861232	187.799862	2848.861232	108.925611	2848.861232	80.236011	2848.861232	187.799862	2848.861232	177.972503
2850.790048	103.416757	2850.790048	102.378772	2850.790048	109.492417	2850.790048	95.194175	2850.790048	187.797586	2850.790048	108.910927	2850.790048	80.212726	2850.790048	187.797586	2850.790048	177.953363
2852.718864	103.384364	2852.718864	102.34988	2852.718864	109.47219	2852.718864	95.171793	2852.718864	187.794797	2852.718864	108.896598	2852.718864	80.199806	2852.718864	187.794797	2852.718864	177.934381
2854.64768	103.351221	2854.64768	102.325957	2854.64768	109.472631	2854.64768	95.155249	2854.64768	187.791468	2854.64768	108.88653	2854.64768	80.203077	2854.64768	187.791468	2854.64768	177.921643
2856.576496	103.324457	2856.576496	102.305797	2856.576496	109.46964	2856.576496	95.141382	2856.576496	187.788761	2856.576496	108.88275	2856.576496	80.221671	2856.576496	187.788761	2856.576496	177.916573
2858.505312	103.31105	2858.505312	102.306733	2858.505312	109.481403	2858.505312	95.136831	2858.505312	187.792418	2858.505312	108.886094	2858.505312	80.247164	2858.505312	187.792418	2858.505312	177.917865
2860.434128	103.312003	2860.434128	102.326706	2860.434128	109.505253	2860.434128	95.149052	2860.434128	187.804713	2860.434128	108.894515	2860.434128	80.281696	2860.434128	187.804713	2860.434128	177.921602
2862.362944	103.328612	2862.362944	102.357685	2862.362944	109.547957	2862.362944	95.181667	2862.362944	187.819924	2862.362944	108.907388	2862.362944	80.3287	2862.362944	187.819924	2862.362944	177.922707
2864.29176	103.356394	2864.29176	102.395892	2864.29176	109.587599	2864.29176	95.219749	2864.29176	187.833705	2864.29176	108.92125	2864.29176	80.380392	2864.29176	187.833705	2864.29176	177.917837
2866.220576	103.386728	2866.220576	102.432896	2866.220576	109.606771	2866.220576	95.257301	2866.220576	187.846315	2866.220576	108.934869	2866.220576	80.438791	2866.220576	187.846315	2866.220576	177.904924
2868.149392	103.415144	2868.149392	102.46617	2868.149392	109.643847	2868.149392	95.291702	2868.149392	187.86481	2868.149392	108.950674	2868.149392	80.501185	2868.149392	187.86481	2868.149392	177.884291
2870.078208	103.434898	2870.078208	102.494744	2870.078208	109.689353	2870.078208	95.319328	2870.078208	187.889522	2870.078208	108.967771	2870.078208	80.564777	2870.078208	187.889522	2870.078208	177.862136
2872.007024	103.446673	2872.007024	102.524374	2872.007024	109.728092	2872.007024	95.343556	2872.007024	187.91186	2872.007024	108.98473	2872.007024	80.61456	2872.007024	187.91186	2872.007024	177.843966
2873.93584	103.450762	2873.93584	102.545984	2873.93584	109.761085	2873.93584	95.360633	2873.93584	187.932686	2873.93584	109.006762	2873.93584	80.644013	2873.93584	187.932686	2873.93584	177.830368
2875.864656	103.450466	2875.864656	102.566374	2875.864656	109.78903	2875.864656	95.372668	2875.864656	187.952487	2875.864656	109.039283	2875.864656	80.657431	2875.864656	187.952487	2875.864656	177.821486
2877.793472	103.455997	2877.793472	102.579706	2877.793472	109.82698	2877.793472	95.380679	2877.793472	187.970256	2877.793472	109.078284	2877.793472	80.653796	2877.793472	187.970256	2877.793472	177.813036
2879.722288	103.471766	2879.722288	102.583321	2879.722288	109.857447	2879.722288	95.381905	2879.722288	187.979806	2879.722288	109.12002	2879.722288	80.63662	2879.722288	187.979806	2879.722288	177.801733
2881.651104	103.493203	2881.651104	102.570471	2881.651104	109.87075	2881.651104	95.380044	2881.651104	187.982196	2881.651104	109.159265	2881.651104	80.617051	2881.651104	187.982196	2881.651104	177.784368
2883.57992	103.515271	2883.57992	102.553633	2883.57992	109.863755	2883.57992	95.375432	2883.57992	187.984346	2883.57992	109.186119	2883.57992	80.603822	2883.57992	187.984346	2883.57992	177.762959
2885.508736	103.52997	2885.508736	102.529646	2885.508736	109.846563	2885.508736	95.364701	2885.508736	187.988601	2885.508736	109.191872	2885.508736	80.600096	2885.508736	187.988601	2885.508736	177.747424
2887.437552	103.530175	2887.437552	102.495784	2887.437552	109.831757	2887.437552	95.347074	2887.437552	187.994457	2887.437552	109.174468	2887.437552	80.59583	2887.437552	187.994457	2887.437552	177.738896
2889.366368	103.514277	2889.366368	102.460444	2889.366368	109.786729	2889.366368	95.323709	2889.366368	187.994918	2889.366368	109.137039	2889.366368	80.591699	2889.366368	187.994918	2889.366368	177.731351
2891.295184	103.481892	2891.295184	102.433077	2891.295184	109.723932	2891.295184	95.302383	2891.295184	187.991697	2891.295184	109.0856	2891.295184	80.588771	2891.295184	187.991697	2891.295184	177.723728
2893.224	103.435569	2893.224	102.41839	2893.224	109.700246	2893.224	95.289753	2893.224	187.985405	2893.224	109.030256	2893.224	80.573866	2893.224	187.985405	2893.224	177.710247
2895.152816	103.378772	2895.152816	102.410568	2895.152816	109.703422	2895.152816	95.279425	2895.152816	187.967062	2895.152816	108.977115	2895.152816	80.532263	2895.152816	187.967062	2895.152816	177.688376
2897.081632	103.313975	2897.081632	102.418602	2897.081632	109.700776	2897.081632	95.265429	2897.081632	187.939836	2897.081632	108.926838	2897.081632	80.463727	2897.081632	187.939836	2897.081632	177.666275
2899.010448	103.250499	2899.010448	102.428449	2899.010448	109.681022	2899.010448	95.243977	2899.010448	187.912914	2899.010448	108.877687	2899.010448	80.382314	2899.010448	187.912914	2899.010448	177.64792
2900.939264	103.193257	2900.939264	102.440523	2900.939264	109.666706	2900.939264	95.215597	2900.939264	187.887595	2900.939264	108.824398	2900.939264	80.289184	2900.939264	187.887595	2900.939264	177.638354
2902.86808	103.13725	2902.86808	102.451196	2902.86808	109.663435	2902.86808	95.184599	2902.86808	187.86198	2902.86808	108.765301	2902.86808	80.184003	2902.86808	187.86198	2902.86808	177.635568
2904.796896	103.079243	2904.796896	102.451031	2904.796896	109.646406	2904.796896	95.145977	2904.796896	187.831574	2904.796896	108.704818	2904.796896	80.082314	2904.796896	187.831574	2904.796896	177.626593
2906.725712	103.017233	2906.725712	102.437879	2906.725712	109.596239	2906.725712	95.084834	2906.725712	187.798777	2906.725712	108.647607	2906.725712	79.988268	2906.725712	187.798777	2906.725712	177.601754
2908.654528	102.951604	2908.654528	102.409079	2908.654528	109.514547	2908.654528	95.01073	2908.654528	187.766001	2908.654528	108.596089	2908.654528	79.895992	2908.654528	187.766001	2908.654528	177.567975
2910.583344	102.886309	2910.583344	102.370096	2910.583344	109.441964	2910.583344	94.937996	2910.583344	187.734579	2910.583344	108.554774	2910.583344	79.803918	2910.583344	187.734579	2910.583344	177.541287
2912.51216	102.824709	2912.51216	102.311851	2912.51216	109.385671	2912.51216	94.874867	2912.51216	187.709809	2912.51216	108.526713	2912.51216	79.724051	2912.51216	187.709809	2912.51216	177.522837
2914.440976	102.774508	2914.440976	102.24655	2914.440976	109.309127	2914.440976	94.820624	2914.440976	187.691221	2914.440976	108.509205	2914.440976	79.665118	2914.440976	187.691221	2914.440976	177.505676
2916.369792	102.737047	2916.369792	102.187022	2916.369792	109.219861	2916.369792	94.768706	2916.369792	187.677822	2916.369792	108.497775	2916.369792	79.617611	2916.369792	187.677822	2916.369792	177.488646
2918.298608	102.708121	2918.298608	102.13801	2918.298608	109.15867	2918.298608	94.723521	2918.298608	187.667944	2918.298608	108.489473	2918.298608	79.583206	2918.298608	187.667944	2918.298608	177.474851
2920.227424	102.692658	2920.227424	102.102986	2920.227424	109.150227	2920.227424	94.693913	2920.227424	187.663747	2920.227424	108.481759	2920.227424	79.573617	2920.227424	187.663747	2920.227424	177.458319
2922.15624	102.689908	2922.15624	102.082872	2922.15624	109.162348	2922.15624	94.687411	2922.15624	187.664749	2922.15624	108.477539	2922.15624	79.581502	2922.15624	187.664749	2922.15624	177.434729
2924.085056	102.696433	2924.085056	102.071023	2924.085056	109.183452	2924.085056	94.700499	2924.085056	187.673614	2924.085056	108.484921	2924.085056	79.607629	2924.085056	187.673614	2924.085056	177.411205
2926.013872	102.709282	2926.013872	102.077481	2926.013872	109.235105	2926.013872	94.726837	2926.013872	187.696059	2926.013872	108.50546	2926.013872	79.652343	2926.013872	187.696059	2926.013872	177.396415
2927.942688	102.726784	2927.942688	102.101631	2927.942688	109.31781	2927.942688	94.774247	2927.942688	187.723608	2927.942688	108.538242	2927.942688	79.720959	2927.942688	187.723608	2927.942688	177.394702
2929.871504	102.751057	2929.871504	102.137137	2929.871504	109.426406	2929.871504	94.840851	2929.871504	187.749812	2929.871504	108.579923	2929.871504	79.810785	2929.871504	187.749812	2929.871504	177.402312
2931.80032	102.781992	2931.80032	102.176057	2931.80032	109.513493	2931.80032	94.924626	2931.80032	187.780463	2931.80032	108.624694	2931.80032	79.90838	2931.80032	187.780463	2931.80032	177.40928
2933.729136	102.820676	2933.729136	102.220656	2933.729136	109.572075	2933.729136	95.018934	2933.729136	187.820269	2933.729136	108.670762	2933.729136	80.019253	2933.729136	187.820269	2933.729136	177.411048
2935.657952	102.865187	2935.657952	102.267331	2935.657952	109.634679	2935.657952	95.108444	2935.657952	187.866065	2935.657952	108.723296	2935.657952	80.146318	2935.657952	187.866065	2935.657952	177.412176
2937.586768	102.912541	2937.586768	102.308078	2937.586768	109.688544	2937.586768	95.18292	2937.586768	187.911083	2937.586768	108.78205	2937.586768	80.27059	2937.586768	187.911083	2937.586768	177.419042
2939.515584	102.963783	2939.515584	102.346631	2939.515584	109.711266	2939.515584	95.243863	2939.515584	187.960877	2939.515584	108.843192	2939.515584	80.382104	2939.515584	187.960877	2939.515584	177.428175
2941.4444	103.02095	2941.4444	102.377373	2941.4444	109.696921	2941.4444	95.291096	2941.4444	188.014524	2941.4444	108.91163	2941.4444	80.473916	2941.4444	188.014524	2941.4444	177.442731
2943.373216	103.08164	2943.373216	102.402949	2943.373216	109.68581	2943.373216	95.3282	2943.373216	188.064203	2943.373216	108.985992	2943.373216	80.543011	2943.373216	188.064203	2943.373216	177.459887
2945.302032	103.141609	2945.302032	102.420825	2945.302032	109.699793	2945.302032	95.356644	2945.302032	188.1056	2945.302032	109.06457	2945.302032	80.59243	2945.302032	188.1056	2945.302032	177.474884
2947.230848	103.20175	2947.230848	102.441903	2947.230848	109.705504	2947.230848	95.378896	2947.230848	188.135194	2947.230848	109.148242	2947.230848	80.627588	2947.230848	188.135194	2947.230848	177.480825
2949.159664	103.261555	2949.159664	102.461924	2949.159664	109.703816	2949.159664	95.389558	2949.159664	188.159305	2949.159664	109.229524	2949.159664	80.65745	2949.159664	188.159305	2949.159664	177.471601
2951.08848	103.316417	2951.08848	102.479254	2951.08848	109.70822	2951.08848	95.39667	2951.08848	188.180548	2951.08848	109.303635	2951.08848	80.684617	2951.08848	188.180548	2951.08848	177.453671
2953.017296	103.364146	2953.017296	102.500768	2953.017296	109.73964	2953.017296	95.411602	2953.017296	188.198802	2953.017296	109.366426	2953.017296	80.707833	2953.017296	188.198802	2953.017296	177.441211
2954.946112	103.403436	2954.946112	102.510637	2954.946112	109.79924	2954.946112	95.433206	2954.946112	188.215527	2954.946112	109.415008	2954.946112	80.724742	2954.946112	188.215527	2954.946112	177.436521
2956.874928	103.432867	2956.874928	102.517843	2956.874928	109.836021	2956.874928	95.445285	2956.874928	188.227841	2956.874928	109.454798	2956.874928	80.742316	2956.874928	188.227841	2956.874928	177.433652
2958.803744	103.452452	2958.803744	102.521212	2958.803744	109.849611	2958.803744	95.450303	2958.803744	188.23871	2958.803744	109.487064	2958.803744	80.759421	2958.803744	188.23871	2958.803744	177.420626
2960.73256	103.466162	2960.73256	102.52801	2960.73256	109.873783	2960.73256	95.455216	2960.73256	188.246492	2960.73256	109.515866	2960.73256	80.768805	2960.73256	188.246492	2960.73256	177.397038
2962.661376	103.4791	2962.661376	102.526348	2962.661376	109.911428	2962.661376	95.463957	2962.661376	188.250845	2962.661376	109.545369	2962.661376	80.779725	2962.661376	188.250845	2962.661376	177.369386
2964.590192	103.492885	2964.590192	102.528471	2964.590192	109.941087	2964.590192	95.477032	2964.590192	188.258166	2964.590192	109.573119	2964.590192	80.798297	2964.590192	188.258166	2964.590192	177.349149
2966.519008	103.511738	2966.519008	102.536663	2966.519008	109.92486	2966.519008	95.492154	2966.519008	188.270285	2966.519008	109.602078	2966.519008	80.823752	2966.519008	188.270285	2966.519008	177.337698
2968.447824	103.540169	2968.447824	102.542362	2968.447824	109.901954	2968.447824	95.506552	2968.447824	188.283061	2968.447824	109.6278	2968.447824	80.850634	2968.447824	188.283061	2968.447824	177.332261
2970.37664	103.575175	2970.37664	102.545744	2970.37664	109.908802	2970.37664	95.527231	2970.37664	188.293853	2970.37664	109.641777	2970.37664	80.872593	2970.37664	188.293853	2970.37664	177.327819
2972.305456	103.613469	2972.305456	102.558044	2972.305456	109.930015	2972.305456	95.554869	2972.305456	188.306716	2972.305456	109.654256	2972.305456	80.896711	2972.305456	188.306716	2972.305456	177.317021
2974.234272	103.648335	2974.234272	102.575674	2974.234272	109.948145	2974.234272	95.584934	2974.234272	188.328034	2974.234272	109.677651	2974.234272	80.926366	2974.234272	188.328034	2974.234272	177.303289
2976.163088	103.670584	2976.163088	102.584132	2976.163088	109.967874	2976.163088	95.601097	2976.163088	188.352842	2976.163088	109.708359	2976.163088	80.955326	2976.163088	188.352842	2976.163088	177.2924
2978.091904	103.684227	2978.091904	102.591291	2978.091904	110.012321	2978.091904	95.606833	2978.091904	188.374938	2978.091904	109.738313	2978.091904	80.990575	2978.091904	188.374938	2978.091904	177.285132
2980.02072	103.694479	2980.02072	102.604439	2980.02072	110.065026	2980.02072	95.613135	2980.02072	188.399124	2980.02072	109.766596	2980.02072	81.022353	2980.02072	188.399124	2980.02072	177.285999
2981.949536	103.703755	2981.949536	102.612778	2981.949536	110.112014	2981.949536	95.625301	2981.949536	188.431857	2981.949536	109.789568	2981.949536	81.048993	2981.949536	188.431857	2981.949536	177.293435
2983.878352	103.713307	2983.878352	102.615893	2983.878352	110.142732	2983.878352	95.646303	2983.878352	188.466143	2983.878352	109.809641	2983.878352	81.074747	2983.878352	188.466143	2983.878352	177.301269
2985.807168	103.72276	2985.807168	102.627463	2985.807168	110.146995	2985.807168	95.664256	2985.807168	188.492512	2985.807168	109.828524	2985.807168	81.098489	2985.807168	188.492512	2985.807168	177.307703
2987.735984	103.737487	2987.735984	102.646206	2987.735984	110.158363	2987.735984	95.669446	2987.735984	188.512417	2987.735984	109.848959	2987.735984	81.117223	2987.735984	188.512417	2987.735984	177.315066
2989.6648	103.76157	2989.6648	102.673468	2989.6648	110.168104	2989.6648	95.684687	2989.6648	188.527917	2989.6648	109.872792	2989.6648	81.125305	2989.6648	188.527917	2989.6648	177.321814
2991.593616	103.787277	2991.593616	102.696057	2991.593616	110.163585	2991.593616	95.707379	2991.593616	188.5463	2991.593616	109.894977	2991.593616	81.121652	2991.593616	188.5463	2991.593616	177.328432
2993.522432	103.807229	2993.522432	102.692219	2993.522432	110.159812	2993.522432	95.717935	2993.522432	188.564961	2993.522432	109.926548	2993.522432	81.120458	2993.522432	188.564961	2993.522432	177.332219
2995.451248	103.815644	2995.451248	102.683253	2995.451248	110.166144	2995.451248	95.710119	2995.451248	188.576957	2995.451248	109.968684	2995.451248	81.127357	2995.451248	188.576957	2995.451248	177.336832
2997.380064	103.808636	2997.380064	102.679151	2997.380064	110.167529	2997.380064	95.697407	2997.380064	188.58842	2997.380064	110.000427	2997.380064	81.133283	2997.380064	188.58842	2997.380064	177.339254
2999.30888	103.796793	2999.30888	102.669073	2999.30888	110.147565	2999.30888	95.680977	2999.30888	188.603314	2999.30888	110.017651	2999.30888	81.134433	2999.30888	188.603314	2999.30888	177.334854
3001.237696	103.783874	3001.237696	102.628328	3001.237696	110.141153	3001.237696	95.667698	3001.237696	188.625192	3001.237696	110.022996	3001.237696	81.137774	3001.237696	188.625192	3001.237696	177.329354
3003.166512	103.767818	3003.166512	102.577724	3003.166512	110.134156	3003.166512	95.659134	3003.166512	188.643962	3003.166512	110.025432	3003.166512	81.144338	3003.166512	188.643962	3003.166512	177.322903
3005.095328	103.754467	3005.095328	102.54547	3005.095328	110.104815	3005.095328	95.66052	3005.095328	188.651417	3005.095328	110.027296	3005.095328	81.153229	3005.095328	188.651417	3005.095328	177.307716
3007.024144	103.745068	3007.024144	102.539463	3007.024144	110.073066	3007.024144	95.669649	3007.024144	188.653901	3007.024144	110.030828	3007.024144	81.160008	3007.024144	188.653901	3007.024144	177.291013
3008.95296	103.743752	3008.95296	102.540182	3008.95296	110.044651	3008.95296	95.672277	3008.95296	188.648296	3008.95296	110.035638	3008.95296	81.16156	3008.95296	188.648296	3008.95296	177.280656
3010.881776	103.749526	3010.881776	102.546174	3010.881776	110.052533	3010.881776	95.690613	3010.881776	188.642074	3010.881776	110.045394	3010.881776	81.156828	3010.881776	188.642074	3010.881776	177.272418
3012.810592	103.754055	3012.810592	102.565268	3012.810592	110.088852	3012.810592	95.712941	3012.810592	188.636547	3012.810592	110.057284	3012.810592	81.147881	3012.810592	188.636547	3012.810592	177.266008
3014.739408	103.757989	3014.739408	102.589561	3014.739408	110.116023	3014.739408	95.709622	3014.739408	188.632094	3014.739408	110.064041	3014.739408	81.142211	3014.739408	188.632094	3014.739408	177.251897
3016.668224	103.756848	3016.668224	102.637241	3016.668224	110.133508	3016.668224	95.697949	3016.668224	188.63048	3016.668224	110.064159	3016.668224	81.144458	3016.668224	188.63048	3016.668224	177.233678
3018.59704	103.744425	3018.59704	102.666541	3018.59704	110.148084	3018.59704	95.677983	3018.59704	188.634032	3018.59704	110.06831	3018.59704	81.14001	3018.59704	188.634032	3018.59704	177.217055
3020.525856	103.72666	3020.525856	102.650094	3020.525856	110.20245	3020.525856	95.669161	3020.525856	188.642803	3020.525856	110.074342	3020.525856	81.132049	3020.525856	188.642803	3020.525856	177.200541
3022.454672	103.711432	3022.454672	102.63091	3022.454672	110.242652	3022.454672	95.676904	3022.454672	188.64667	3022.454672	110.070931	3022.454672	81.13186	3022.454672	188.64667	3022.454672	177.187469
3024.383488	103.706036	3024.383488	102.608017	3024.383488	110.216611	3024.383488	95.686604	3024.383488	188.649461	3024.383488	110.06739	3024.383488	81.135803	3024.383488	188.649461	3024.383488	177.171753
3026.312304	103.709382	3026.312304	102.578038	3026.312304	110.176237	3026.312304	95.698919	3026.312304	188.660105	3026.312304	110.070964	3026.312304	81.14158	3026.312304	188.660105	3026.312304	177.154733
3028.24112	103.713417	3028.24112	102.546334	3028.24112	110.144863	3028.24112	95.722897	3028.24112	188.670633	3028.24112	110.088191	3028.24112	81.148505	3028.24112	188.670633	3028.24112	177.135631
3030.169936	103.71953	3030.169936	102.53475	3030.169936	110.157519	3030.169936	95.742137	3030.169936	188.677288	3030.169936	110.108155	3030.169936	81.154993	3030.169936	188.677288	3030.169936	177.115092
3032.098752	103.728228	3032.098752	102.546134	3032.098752	110.184172	3032.098752	95.747378	3032.098752	188.686108	3032.098752	110.115715	3032.098752	81.1625	3032.098752	188.686108	3032.098752	177.092115
3034.027568	103.735522	3034.027568	102.57129	3034.027568	110.205836	3034.027568	95.749303	3034.027568	188.695038	3034.027568	110.116929	3034.027568	81.16183	3034.027568	188.695038	3034.027568	177.075286
3035.956384	103.735052	3035.956384	102.592909	3035.956384	110.243075	3035.956384	95.76503	3035.956384	188.704173	3035.956384	110.119425	3035.956384	81.157352	3035.956384	188.704173	3035.956384	177.066223
3037.8852	103.72389	3037.8852	102.604759	3037.8852	110.282572	3037.8852	95.783927	3037.8852	188.717479	3037.8852	110.120957	3037.8852	81.155954	3037.8852	188.717479	3037.8852	177.054197
3039.814016	103.709453	3039.814016	102.620405	3039.814016	110.326589	3039.814016	95.797356	3039.814016	188.727815	3039.814016	110.127132	3039.814016	81.155319	3039.814016	188.727815	3039.814016	177.033826
3041.742832	103.696341	3041.742832	102.66015	3041.742832	110.325115	3041.742832	95.810226	3041.742832	188.724903	3041.742832	110.139532	3041.742832	81.1483	3041.742832	188.724903	3041.742832	177.010295
3043.671648	103.686825	3043.671648	102.713409	3043.671648	110.2818	3043.671648	95.831566	3043.671648	188.717824	3043.671648	110.157153	3043.671648	81.138489	3043.671648	188.717824	3043.671648	176.994734
3045.600464	103.686713	3045.600464	102.729381	3045.600464	110.263674	3045.600464	95.857234	3045.600464	188.714417	3045.600464	110.180834	3045.600464	81.137211	3045.600464	188.714417	3045.600464	176.977488
3047.52928	103.696372	3047.52928	102.710858	3047.52928	110.247941	3047.52928	95.874083	3047.52928	188.720141	3047.52928	110.198994	3047.52928	81.14464	3047.52928	188.720141	3047.52928	176.955758
3049.458096	103.712438	3049.458096	102.707559	3049.458096	110.224254	3049.458096	95.881803	3049.458096	188.738342	3049.458096	110.204885	3049.458096	81.154044	3049.458096	188.738342	3049.458096	176.937983
3051.386912	103.726368	3051.386912	102.715409	3051.386912	110.202338	3051.386912	95.86008	3051.386912	188.757423	3051.386912	110.20469	3051.386912	81.171372	3051.386912	188.757423	3051.386912	176.926516
3053.315728	103.731538	3053.315728	102.711492	3053.315728	110.208779	3053.315728	95.821266	3053.315728	188.771214	3053.315728	110.202201	3053.315728	81.196817	3053.315728	188.771214	3053.315728	176.919969
3055.244544	103.725337	3055.244544	102.682029	3055.244544	110.243567	3055.244544	95.789947	3055.244544	188.780704	3055.244544	110.202215	3055.244544	81.216295	3055.244544	188.780704	3055.244544	176.909319
3057.17336	103.712099	3057.17336	102.647439	3057.17336	110.237048	3057.17336	95.77079	3057.17336	188.790842	3057.17336	110.214613	3057.17336	81.213648	3057.17336	188.790842	3057.17336	176.895284
3059.102176	103.696543	3059.102176	102.624078	3059.102176	110.188103	3059.102176	95.776917	3059.102176	188.805411	3059.102176	110.23989	3059.102176	81.200309	3059.102176	188.805411	3059.102176	176.882359
3061.030992	103.685862	3061.030992	102.613355	3061.030992	110.140302	3061.030992	95.786341	3061.030992	188.808702	3061.030992	110.262114	3061.030992	81.190881	3061.030992	188.808702	3061.030992	176.875002
3062.959808	103.676329	3062.959808	102.61804	3062.959808	110.12998	3062.959808	95.788617	3062.959808	188.807126	3062.959808	110.284383	3062.959808	81.185244	3062.959808	188.807126	3062.959808	176.867934
3064.888624	103.664596	3064.888624	102.643505	3064.888624	110.162033	3064.888624	95.787215	3064.888624	188.817039	3064.888624	110.309235	3064.888624	81.184	3064.888624	188.817039	3064.888624	176.856422
3066.81744	103.654253	3066.81744	102.678028	3066.81744	110.197659	3066.81744	95.786635	3066.81744	188.835744	3066.81744	110.32856	3066.81744	81.189871	3066.81744	188.835744	3066.81744	176.837585
3068.746256	103.649115	3068.746256	102.698438	3068.746256	110.239992	3068.746256	95.781222	3068.746256	188.852254	3068.746256	110.329939	3068.746256	81.203652	3068.746256	188.852254	3068.746256	176.819827
3070.675072	103.648433	3070.675072	102.684077	3070.675072	110.299043	3070.675072	95.764673	3070.675072	188.864695	3070.675072	110.318583	3070.675072	81.218845	3070.675072	188.864695	3070.675072	176.801073
3072.603888	103.647802	3072.603888	102.656609	3072.603888	110.351357	3072.603888	95.760836	3072.603888	188.879051	3072.603888	110.311904	3072.603888	81.22784	3072.603888	188.879051	3072.603888	176.778196
3074.532704	103.644674	3074.532704	102.644852	3074.532704	110.368158	3074.532704	95.774083	3074.532704	188.888762	3074.532704	110.311995	3074.532704	81.238841	3074.532704	188.888762	3074.532704	176.761671
3076.46152	103.642733	3076.46152	102.6457	3076.46152	110.327356	3076.46152	95.784207	3076.46152	188.898988	3076.46152	110.321274	3076.46152	81.244055	3076.46152	188.898988	3076.46152	176.753719
3078.390336	103.642906	3078.390336	102.651828	3078.390336	110.282358	3078.390336	95.781415	3078.390336	188.910123	3078.390336	110.340659	3078.390336	81.236956	3078.390336	188.910123	3078.390336	176.74944
3080.319152	103.643601	3080.319152	102.651591	3080.319152	110.250092	3080.319152	95.784846	3080.319152	188.917415	3080.319152	110.363315	3080.319152	81.228118	3080.319152	188.917415	3080.319152	176.74206
3082.247968	103.64471	3082.247968	102.662007	3082.247968	110.245273	3082.247968	95.796507	3082.247968	188.929551	3082.247968	110.381906	3082.247968	81.218758	3082.247968	188.929551	3082.247968	176.734327
3084.176784	103.648542	3084.176784	102.676396	3084.176784	110.281018	3084.176784	95.787358	3084.176784	188.944576	3084.176784	110.399101	3084.176784	81.214222	3084.176784	188.944576	3084.176784	176.72523
3086.1056	103.648688	3086.1056	102.706288	3086.1056	110.345961	3086.1056	95.749484	3086.1056	188.956414	3086.1056	110.412146	3086.1056	81.216152	3086.1056	188.956414	3086.1056	176.715159
3088.034416	103.638598	3088.034416	102.745166	3088.034416	110.398891	3088.034416	95.709616	3088.034416	188.966405	3088.034416	110.412706	3088.034416	81.221514	3088.034416	188.966405	3088.034416	176.705551
3089.963232	103.620151	3089.963232	102.757494	3089.963232	110.417306	3089.963232	95.67911	3089.963232	188.981351	3089.963232	110.416432	3089.963232	81.228913	3089.963232	188.981351	3089.963232	176.687987
3091.892048	103.599165	3091.892048	102.749439	3091.892048	110.393826	3091.892048	95.66436	3091.892048	188.995989	3091.892048	110.422499	3091.892048	81.229414	3091.892048	188.995989	3091.892048	176.662858
3093.820864	103.578095	3093.820864	102.714606	3093.820864	110.323402	3093.820864	95.65814	3093.820864	188.999932	3093.820864	110.421468	3093.820864	81.228008	3093.820864	188.999932	3093.820864	176.63563
3095.74968	103.557365	3095.74968	102.654059	3095.74968	110.238244	3095.74968	95.665924	3095.74968	188.992223	3095.74968	110.427617	3095.74968	81.232546	3095.74968	188.992223	3095.74968	176.613315
3097.678496	103.534166	3097.678496	102.593629	3097.678496	110.18291	3097.678496	95.67805	3097.678496	188.987185	3097.678496	110.443228	3097.678496	81.239104	3097.678496	188.987185	3097.678496	176.59556
3099.607312	103.516434	3099.607312	102.557381	3099.607312	110.136743	3099.607312	95.673443	3099.607312	188.984691	3099.607312	110.4546	3099.607312	81.24165	3099.607312	188.984691	3099.607312	176.579652
3101.536128	103.508344	3101.536128	102.557073	3101.536128	110.127376	3101.536128	95.655943	3101.536128	188.98685	3101.536128	110.460914	3101.536128	81.23807	3101.536128	188.98685	3101.536128	176.565914
3103.464944	103.504523	3103.464944	102.576037	3103.464944	110.166874	3103.464944	95.634902	3103.464944	188.995676	3103.464944	110.453869	3103.464944	81.228172	3103.464944	188.995676	3103.464944	176.553798
3105.39376	103.499193	3105.39376	102.608639	3105.39376	110.225793	3105.39376	95.608312	3105.39376	189.009066	3105.39376	110.446774	3105.39376	81.220307	3105.39376	189.009066	3105.39376	176.542813
3107.322576	103.490044	3107.322576	102.642177	3107.322576	110.264339	3107.322576	95.58691	3107.322576	189.015824	3107.322576	110.449328	3107.322576	81.211628	3107.322576	189.015824	3107.322576	176.532055
3109.251392	103.477787	3109.251392	102.663041	3109.251392	110.281633	3109.251392	95.566071	3109.251392	189.013814	3109.251392	110.458883	3109.251392	81.20507	3109.251392	189.013814	3109.251392	176.52857
3111.180208	103.46757	3111.180208	102.642344	3111.180208	110.279772	3111.180208	95.561729	3111.180208	189.012206	3111.180208	110.472722	3111.180208	81.207492	3111.180208	189.012206	3111.180208	176.521691
3113.109024	103.45622	3113.109024	102.612663	3113.109024	110.252085	3113.109024	95.573003	3113.109024	189.017979	3113.109024	110.49305	3113.109024	81.216584	3113.109024	189.017979	3113.109024	176.506343
3115.03784	103.449895	3115.03784	102.564478	3115.03784	110.198306	3115.03784	95.584187	3115.03784	189.032789	3115.03784	110.515579	3115.03784	81.227133	3115.03784	189.032789	3115.03784	176.485809
3116.966656	103.447645	3116.966656	102.502216	3116.966656	110.166848	3116.966656	95.582053	3116.966656	189.051387	3116.966656	110.531221	3116.966656	81.243317	3116.966656	189.051387	3116.966656	176.457915
3118.895472	103.448296	3118.895472	102.482412	3118.895472	110.137525	3118.895472	95.586662	3118.895472	189.069257	3118.895472	110.540034	3118.895472	81.26516	3118.895472	189.069257	3118.895472	176.436904
3120.824288	103.448316	3120.824288	102.481859	3120.824288	110.144394	3120.824288	95.592936	3120.824288	189.09083	3120.824288	110.548626	3120.824288	81.278367	3120.824288	189.09083	3120.824288	176.427494
3122.753104	103.44338	3122.753104	102.48806	3122.753104	110.206649	3122.753104	95.587822	3122.753104	189.115136	3122.753104	110.562659	3122.753104	81.283103	3122.753104	189.115136	3122.753104	176.415923
3124.68192	103.429936	3124.68192	102.525187	3124.68192	110.27151	3124.68192	95.591979	3124.68192	189.136272	3124.68192	110.582065	3124.68192	81.28785	3124.68192	189.136272	3124.68192	176.399843
3126.610736	103.410206	3126.610736	102.587599	3126.610736	110.32484	3126.610736	95.618041	3126.610736	189.146369	3126.610736	110.606029	3126.610736	81.29196	3126.610736	189.146369	3126.610736	176.385452
3128.539552	103.390765	3128.539552	102.66627	3128.539552	110.373443	3128.539552	95.646212	3128.539552	189.158903	3128.539552	110.637871	3128.539552	81.303437	3128.539552	189.158903	3128.539552	176.375449
3130.468368	103.380343	3130.468368	102.727132	3130.468368	110.429881	3130.468368	95.680913	3130.468368	189.177247	3130.468368	110.674085	3130.468368	81.320154	3130.468368	189.177247	3130.468368	176.367205
3132.397184	103.376239	3132.397184	102.758768	3132.397184	110.481105	3132.397184	95.718208	3132.397184	189.195225	3132.397184	110.710312	3132.397184	81.342161	3132.397184	189.195225	3132.397184	176.353376
3134.326	103.376756	3134.326	102.769822	3134.326	110.480596	3134.326	95.763661	3134.326	189.213797	3134.326	110.73697	3134.326	81.368537	3134.326	189.213797	3134.326	176.332899
3136.254816	103.384811	3136.254816	102.769714	3136.254816	110.484051	3136.254816	95.799246	3136.254816	189.231923	3136.254816	110.764324	3136.254816	81.389683	3136.254816	189.231923	3136.254816	176.316684
3138.183632	103.394336	3138.183632	102.757469	3138.183632	110.486606	3138.183632	95.816242	3138.183632	189.253725	3138.183632	110.786829	3138.183632	81.410505	3138.183632	189.253725	3138.183632	176.295567
3140.112448	103.398923	3140.112448	102.751057	3140.112448	110.506645	3140.112448	95.826922	3140.112448	189.28033	3140.112448	110.805284	3140.112448	81.431191	3140.112448	189.28033	3140.112448	176.262981
3142.041264	103.40199	3142.041264	102.75126	3142.041264	110.525114	3142.041264	95.830929	3142.041264	189.30431	3142.041264	110.835522	3142.041264	81.443042	3142.041264	189.30431	3142.041264	176.231519
3143.97008	103.402378	3143.97008	102.770206	3143.97008	110.501295	3143.97008	95.827719	3143.97008	189.327455	3143.97008	110.86723	3143.97008	81.44382	3143.97008	189.327455	3143.97008	176.207485
3145.898896	103.402722	3145.898896	102.797536	3145.898896	110.472623	3145.898896	95.831823	3145.898896	189.3439	3145.898896	110.895526	3145.898896	81.437379	3145.898896	189.3439	3145.898896	176.190186
3147.827712	103.400671	3147.827712	102.79955	3147.827712	110.459041	3147.827712	95.835081	3147.827712	189.355236	3147.827712	110.927499	3147.827712	81.441913	3147.827712	189.355236	3147.827712	176.169826
3149.756528	103.393952	3149.756528	102.787202	3149.756528	110.457761	3149.756528	95.847419	3149.756528	189.363461	3149.756528	110.957051	3149.756528	81.45619	3149.756528	189.363461	3149.756528	176.140505
3151.685344	103.387673	3151.685344	102.781239	3151.685344	110.453547	3151.685344	95.860469	3151.685344	189.364605	3151.685344	110.978693	3151.685344	81.462736	3151.685344	189.364605	3151.685344	176.10983
3153.61416	103.37902	3153.61416	102.773044	3153.61416	110.430443	3153.61416	95.866023	3153.61416	189.366062	3153.61416	110.98965	3153.61416	81.461541	3153.61416	189.366062	3153.61416	176.083747
3155.542976	103.359974	3155.542976	102.762727	3155.542976	110.431566	3155.542976	95.864349	3155.542976	189.374008	3155.542976	110.993151	3155.542976	81.463969	3155.542976	189.374008	3155.542976	176.056913
3157.471792	103.332574	3157.471792	102.750168	3157.471792	110.438246	3157.471792	95.878187	3157.471792	189.378376	3157.471792	110.996491	3157.471792	81.461272	3157.471792	189.378376	3157.471792	176.028857
3159.400608	103.295987	3159.400608	102.749736	3159.400608	110.445718	3159.400608	95.896253	3159.400608	189.377293	3159.400608	111.005761	3159.400608	81.449959	3159.400608	189.377293	3159.400608	176.001416
3161.329424	103.25587	3161.329424	102.771759	3161.329424	110.445595	3161.329424	95.897946	3161.329424	189.378508	3161.329424	111.016858	3161.329424	81.436444	3161.329424	189.378508	3161.329424	175.973708
3163.25824	103.217736	3163.25824	102.815552	3163.25824	110.462838	3163.25824	95.893158	3163.25824	189.379692	3163.25824	111.023283	3163.25824	81.429031	3163.25824	189.379692	3163.25824	175.948539
3165.187056	103.18625	3165.187056	102.855009	3165.187056	110.507817	3165.187056	95.889472	3165.187056	189.381868	3165.187056	111.024263	3165.187056	81.425885	3165.187056	189.381868	3165.187056	175.925061
3167.115872	103.170049	3167.115872	102.861259	3167.115872	110.557097	3167.115872	95.879394	3167.115872	189.390799	3167.115872	111.027988	3167.115872	81.422179	3167.115872	189.390799	3167.115872	175.898228
3169.044688	103.16759	3169.044688	102.851152	3169.044688	110.595075	3169.044688	95.864055	3169.044688	189.400675	3169.044688	111.036542	3169.044688	81.421951	3169.044688	189.400675	3169.044688	175.876676
3170.973504	103.174938	3170.973504	102.832781	3170.973504	110.579868	3170.973504	95.839937	3170.973504	189.406067	3170.973504	111.038746	3170.973504	81.427528	3170.973504	189.406067	3170.973504	175.859484
3172.90232	103.18759	3172.90232	102.784818	3172.90232	110.534646	3172.90232	95.814624	3172.90232	189.407252	3172.90232	111.044935	3172.90232	81.424999	3172.90232	189.407252	3172.90232	175.836769
3174.831136	103.191977	3174.831136	102.716855	3174.831136	110.501782	3174.831136	95.787301	3174.831136	189.406459	3174.831136	111.054673	3174.831136	81.413299	3174.831136	189.406459	3174.831136	175.809061
3176.759952	103.185142	3176.759952	102.65429	3176.759952	110.434473	3176.759952	95.773353	3176.759952	189.410283	3176.759952	111.069893	3176.759952	81.406304	3176.759952	189.410283	3176.759952	175.78502
3178.688768	103.168303	3178.688768	102.60988	3178.688768	110.353152	3178.688768	95.763191	3178.688768	189.418471	3178.688768	111.089021	3178.688768	81.402698	3178.688768	189.418471	3178.688768	175.755821
3180.617584	103.140434	3180.617584	102.590659	3180.617584	110.302542	3180.617584	95.739015	3180.617584	189.429894	3180.617584	111.099694	3180.617584	81.394609	3180.617584	189.429894	3180.617584	175.722612
3182.5464	103.108599	3182.5464	102.599749	3182.5464	110.30393	3182.5464	95.716295	3182.5464	189.436259	3182.5464	111.117115	3182.5464	81.388769	3182.5464	189.436259	3182.5464	175.691302
3184.475216	103.076205	3184.475216	102.634326	3184.475216	110.355089	3184.475216	95.705669	3184.475216	189.442744	3184.475216	111.134974	3184.475216	81.383735	3184.475216	189.442744	3184.475216	175.667948
3186.404032	103.047187	3186.404032	102.668875	3186.404032	110.424155	3186.404032	95.709554	3186.404032	189.453366	3186.404032	111.14545	3186.404032	81.383545	3186.404032	189.453366	3186.404032	175.650236
3188.332848	103.029514	3188.332848	102.703157	3188.332848	110.48882	3188.332848	95.720667	3188.332848	189.464857	3188.332848	111.15249	3188.332848	81.381414	3188.332848	189.464857	3188.332848	175.628161
3190.261664	103.01446	3190.261664	102.737062	3190.261664	110.501156	3190.261664	95.731803	3190.261664	189.479917	3190.261664	111.160925	3190.261664	81.372367	3190.261664	189.479917	3190.261664	175.602555
3192.19048	102.993286	3192.19048	102.746348	3192.19048	110.504733	3192.19048	95.744138	3192.19048	189.488244	3192.19048	111.17054	3192.19048	81.372079	3192.19048	189.488244	3192.19048	175.57307
3194.119296	102.965904	3194.119296	102.736299	3194.119296	110.511923	3194.119296	95.752976	3194.119296	189.490703	3194.119296	111.179999	3194.119296	81.373286	3194.119296	189.490703	3194.119296	175.536017
3196.048112	102.937646	3196.048112	102.741879	3196.048112	110.470241	3196.048112	95.756224	3196.048112	189.497717	3196.048112	111.190319	3196.048112	81.365483	3196.048112	189.497717	3196.048112	175.505751
3197.976928	102.90853	3197.976928	102.737003	3197.976928	110.425152	3197.976928	95.735449	3197.976928	189.508605	3197.976928	111.201446	3197.976928	81.358415	3197.976928	189.508605	3197.976928	175.4775
3199.905744	102.879586	3199.905744	102.719803	3199.905744	110.418342	3199.905744	95.706489	3199.905744	189.515786	3199.905744	111.216018	3199.905744	81.354366	3199.905744	189.515786	3199.905744	175.448369
3201.83456	102.856443	3201.83456	102.694662	3201.83456	110.416604	3201.83456	95.677011	3201.83456	189.520153	3201.83456	111.227823	3201.83456	81.348284	3201.83456	189.520153	3201.83456	175.42259
3203.763376	102.849064	3203.763376	102.674519	3203.763376	110.430514	3203.763376	95.639747	3203.763376	189.526357	3203.763376	111.237533	3203.763376	81.332545	3203.763376	189.526357	3203.763376	175.396307
3205.692192	102.855629	3205.692192	102.663509	3205.692192	110.42811	3205.692192	95.597808	3205.692192	189.532217	3205.692192	111.246219	3205.692192	81.317141	3205.692192	189.532217	3205.692192	175.362123
3207.621008	102.865867	3207.621008	102.644784	3207.621008	110.40794	3207.621008	95.562964	3207.621008	189.532639	3207.621008	111.260476	3207.621008	81.311716	3207.621008	189.532639	3207.621008	175.326789
3209.549824	102.873717	3209.549824	102.606143	3209.549824	110.38055	3209.549824	95.539486	3209.549824	189.527368	3209.549824	111.278457	3209.549824	81.307401	3209.549824	189.527368	3209.549824	175.297847
3211.47864	102.870968	3211.47864	102.556554	3211.47864	110.335578	3211.47864	95.523336	3211.47864	189.525638	3211.47864	111.288327	3211.47864	81.301061	3211.47864	189.525638	3211.47864	175.273981
3213.407456	102.857626	3213.407456	102.503523	3213.407456	110.278163	3213.407456	95.50702	3213.407456	189.529429	3213.407456	111.300241	3213.407456	81.299269	3213.407456	189.529429	3213.407456	175.250428
3215.336272	102.825164	3215.336272	102.472299	3215.336272	110.230964	3215.336272	95.50054	3215.336272	189.537816	3215.336272	111.313683	3215.336272	81.303438	3215.336272	189.537816	3215.336272	175.223965
3217.265088	102.771587	3217.265088	102.462628	3217.265088	110.249881	3217.265088	95.495106	3217.265088	189.545213	3217.265088	111.328776	3217.265088	81.308655	3217.265088	189.545213	3217.265088	175.188484
3219.193904	102.714228	3219.193904	102.467357	3219.193904	110.320137	3219.193904	95.484608	3219.193904	189.546917	3219.193904	111.347163	3219.193904	81.308783	3219.193904	189.546917	3219.193904	175.1455
3221.12272	102.665222	3221.12272	102.504759	3221.12272	110.378161	3221.12272	95.484013	3221.12272	189.54562	3221.12272	111.36372	3221.12272	81.301686	3221.12272	189.54562	3221.12272	175.105176
3223.051536	102.62809	3223.051536	102.566727	3223.051536	110.426543	3223.051536	95.494051	3223.051536	189.547044	3223.051536	111.370879	3223.051536	81.28655	3223.051536	189.547044	3223.051536	175.076547
3224.980352	102.605945	3224.980352	102.61743	3224.980352	110.463904	3224.980352	95.519626	3224.980352	189.550128	3224.980352	111.376802	3224.980352	81.276753	3224.980352	189.550128	3224.980352	175.049335
3226.909168	102.595577	3226.909168	102.659145	3226.909168	110.503336	3226.909168	95.536833	3226.909168	189.54811	3226.909168	111.39037	3226.909168	81.277644	3226.909168	189.54811	3226.909168	175.025375
3228.837984	102.589049	3228.837984	102.671234	3228.837984	110.521937	3228.837984	95.538404	3228.837984	189.545834	3228.837984	111.408847	3228.837984	81.287883	3228.837984	189.545834	3228.837984	175.000601
3230.7668	102.585945	3230.7668	102.674684	3230.7668	110.488813	3230.7668	95.530232	3230.7668	189.546502	3230.7668	111.428855	3230.7668	81.301528	3230.7668	189.546502	3230.7668	174.969814
3232.695616	102.587476	3232.695616	102.654045	3232.695616	110.432248	3232.695616	95.51904	3232.695616	189.542565	3232.695616	111.452803	3232.695616	81.306801	3232.695616	189.542565	3232.695616	174.943581
3234.624432	102.589817	3234.624432	102.587799	3234.624432	110.405967	3234.624432	95.51612	3234.624432	189.535598	3234.624432	111.474849	3234.624432	81.303737	3234.624432	189.535598	3234.624432	174.916902
3236.553248	102.590778	3236.553248	102.522045	3236.553248	110.392011	3236.553248	95.510017	3236.553248	189.535896	3236.553248	111.494708	3236.553248	81.300828	3236.553248	189.535896	3236.553248	174.891501
3238.482064	102.588933	3238.482064	102.496331	3238.482064	110.333013	3238.482064	95.511409	3238.482064	189.540435	3238.482064	111.518102	3238.482064	81.296053	3238.482064	189.540435	3238.482064	174.870334
3240.41088	102.586225	3240.41088	102.512983	3240.41088	110.267809	3240.41088	95.499737	3240.41088	189.542644	3240.41088	111.536409	3240.41088	81.292125	3240.41088	189.542644	3240.41088	174.851554
3242.339696	102.580814	3242.339696	102.53581	3242.339696	110.244636	3242.339696	95.484376	3242.339696	189.554557	3242.339696	111.546878	3242.339696	81.289559	3242.339696	189.554557	3242.339696	174.830256
3244.268512	102.571214	3244.268512	102.547155	3244.268512	110.275764	3244.268512	95.487324	3244.268512	189.572004	3244.268512	111.557263	3244.268512	81.287694	3244.268512	189.572004	3244.268512	174.801441
3246.197328	102.552279	3246.197328	102.552136	3246.197328	110.311582	3246.197328	95.49943	3246.197328	189.584678	3246.197328	111.57193	3246.197328	81.293306	3246.197328	189.584678	3246.197328	174.770235
3248.126144	102.523971	3248.126144	102.557721	3248.126144	110.300585	3248.126144	95.504733	3248.126144	189.590452	3248.126144	111.582801	3248.126144	81.302396	3248.126144	189.590452	3248.126144	174.738561
3250.05496	102.490789	3250.05496	102.559152	3250.05496	110.28269	3250.05496	95.501262	3250.05496	189.583174	3250.05496	111.595323	3250.05496	81.312716	3250.05496	189.583174	3250.05496	174.712405
3251.983776	102.456413	3251.983776	102.54373	3251.983776	110.288081	3251.983776	95.499046	3251.983776	189.576699	3251.983776	111.610147	3251.983776	81.317005	3251.983776	189.576699	3251.983776	174.692984
3253.912592	102.425873	3253.912592	102.517493	3253.912592	110.300183	3253.912592	95.522067	3253.912592	189.578337	3253.912592	111.623602	3253.912592	81.306292	3253.912592	189.578337	3253.912592	174.674063
3255.841408	102.401977	3255.841408	102.492388	3255.841408	110.279201	3255.841408	95.547334	3255.841408	189.581024	3255.841408	111.637992	3255.841408	81.291534	3255.841408	189.581024	3255.841408	174.650419
3257.770224	102.387675	3257.770224	102.488683	3257.770224	110.224794	3257.770224	95.552284	3257.770224	189.577475	3257.770224	111.629188	3257.770224	81.279348	3257.770224	189.577475	3257.770224	174.627038
3259.69904	102.378015	3259.69904	102.49301	3259.69904	110.231989	3259.69904	95.54321	3259.69904	189.570833	3259.69904	111.615859	3259.69904	81.266647	3259.69904	189.570833	3259.69904	174.60845
3261.627856	102.369642	3261.627856	102.498717	3261.627856	110.304534	3261.627856	95.531724	3261.627856	189.569928	3261.627856	111.615325	3261.627856	81.254901	3261.627856	189.569928	3261.627856	174.586335
3263.556672	102.357694	3263.556672	102.519436	3263.556672	110.384906	3263.556672	95.52524	3263.556672	189.575131	3263.556672	111.62326	3263.556672	81.245346	3263.556672	189.575131	3263.556672	174.563123
3265.485488	102.347174	3265.485488	102.536462	3265.485488	110.416574	3265.485488	95.507378	3265.485488	189.577236	3265.485488	111.631857	3265.485488	81.239568	3265.485488	189.577236	3265.485488	174.54099
3267.414304	102.336138	3267.414304	102.554873	3267.414304	110.397747	3267.414304	95.482219	3267.414304	189.575036	3267.414304	111.638614	3267.414304	81.233305	3267.414304	189.575036	3267.414304	174.514717
3269.34312	102.320776	3269.34312	102.560418	3269.34312	110.370088	3269.34312	95.476328	3269.34312	189.577796	3269.34312	111.644713	3269.34312	81.218455	3269.34312	189.577796	3269.34312	174.481744
3271.271936	102.30847	3271.271936	102.544182	3271.271936	110.347642	3271.271936	95.488039	3271.271936	189.587343	3271.271936	111.658819	3271.271936	81.201667	3271.271936	189.587343	3271.271936	174.440808
3273.200752	102.298557	3273.200752	102.505914	3273.200752	110.301661	3273.200752	95.500364	3273.200752	189.589564	3273.200752	111.673014	3273.200752	81.192011	3273.200752	189.589564	3273.200752	174.393417
3275.129568	102.287933	3275.129568	102.473953	3275.129568	110.254623	3275.129568	95.487969	3275.129568	189.578809	3275.129568	111.676335	3275.129568	81.19071	3275.129568	189.578809	3275.129568	174.349634
3277.058384	102.274016	3277.058384	102.457729	3277.058384	110.222076	3277.058384	95.476178	3277.058384	189.568638	3277.058384	111.680715	3277.058384	81.190522	3277.058384	189.568638	3277.058384	174.316382
3278.9872	102.255046	3278.9872	102.4491	3278.9872	110.258039	3278.9872	95.461819	3278.9872	189.577593	3278.9872	111.684281	3278.9872	81.190161	3278.9872	189.577593	3278.9872	174.287536
3280.916016	102.225161	3280.916016	102.427602	3280.916016	110.315589	3280.916016	95.445427	3280.916016	189.591686	3280.916016	111.694235	3280.916016	81.189369	3280.916016	189.591686	3280.916016	174.248065
3282.844832	102.183337	3282.844832	102.42043	3282.844832	110.343721	3282.844832	95.428252	3282.844832	189.596506	3282.844832	111.701153	3282.844832	81.191795	3282.844832	189.596506	3282.844832	174.202132
3284.773648	102.132165	3284.773648	102.438004	3284.773648	110.339476	3284.773648	95.41069	3284.773648	189.593909	3284.773648	111.707043	3284.773648	81.194154	3284.773648	189.593909	3284.773648	174.168415
3286.702464	102.078502	3286.702464	102.447172	3286.702464	110.322805	3286.702464	95.401673	3286.702464	189.586272	3286.702464	111.726105	3286.702464	81.193149	3286.702464	189.586272	3286.702464	174.14435
3288.63128	102.034935	3288.63128	102.435269	3288.63128	110.291578	3288.63128	95.411085	3288.63128	189.576573	3288.63128	111.749449	3288.63128	81.19366	3288.63128	189.576573	3288.63128	174.118698
3290.560096	102.008056	3290.560096	102.402705	3290.560096	110.2319	3290.560096	95.428726	3290.560096	189.571048	3290.560096	111.769593	3290.560096	81.194928	3290.560096	189.571048	3290.560096	174.091744
3292.488912	102.000501	3292.488912	102.366779	3292.488912	110.175216	3292.488912	95.432312	3292.488912	189.577491	3292.488912	111.777911	3292.488912	81.197632	3292.488912	189.577491	3292.488912	174.061956
3294.417728	102.007947	3294.417728	102.37019	3294.417728	110.160726	3294.417728	95.412191	3294.417728	189.599612	3294.417728	111.784733	3294.417728	81.210026	3294.417728	189.599612	3294.417728	174.027617
3296.346544	102.018421	3296.346544	102.38836	3296.346544	110.172946	3296.346544	95.387425	3296.346544	189.623508	3296.346544	111.80085	3296.346544	81.222427	3296.346544	189.623508	3296.346544	173.992256
3298.27536	102.02375	3298.27536	102.386613	3298.27536	110.238585	3298.27536	95.363641	3298.27536	189.641064	3298.27536	111.834021	3298.27536	81.225918	3298.27536	189.641064	3298.27536	173.955522
3300.204176	102.022896	3300.204176	102.381035	3300.204176	110.28103	3300.204176	95.346576	3300.204176	189.651517	3300.204176	111.874834	3300.204176	81.225329	3300.204176	189.651517	3300.204176	173.925141
3302.132992	102.01374	3302.132992	102.393864	3302.132992	110.28561	3302.132992	95.34178	3302.132992	189.657118	3302.132992	111.906622	3302.132992	81.221271	3302.132992	189.657118	3302.132992	173.904907
3304.061808	101.997096	3304.061808	102.416425	3304.061808	110.284165	3304.061808	95.342357	3304.061808	189.662477	3304.061808	111.929595	3304.061808	81.215703	3304.061808	189.662477	3304.061808	173.88715
3305.990624	101.971582	3305.990624	102.437009	3305.990624	110.264591	3305.990624	95.353014	3305.990624	189.66918	3305.990624	111.95147	3305.990624	81.211263	3305.990624	189.66918	3305.990624	173.865708
3307.91944	101.936526	3307.91944	102.432469	3307.91944	110.22456	3307.91944	95.370254	3307.91944	189.676408	3307.91944	111.973608	3307.91944	81.216874	3307.91944	189.676408	3307.91944	173.84387
3309.848256	101.902264	3309.848256	102.43591	3309.848256	110.171534	3309.848256	95.373859	3309.848256	189.680015	3309.848256	111.99904	3309.848256	81.229643	3309.848256	189.680015	3309.848256	173.824625
3311.777072	101.87978	3311.777072	102.432164	3311.777072	110.151734	3311.777072	95.364698	3311.777072	189.676559	3311.777072	112.019247	3311.777072	81.236354	3311.777072	189.676559	3311.777072	173.806605
3313.705888	101.869431	3313.705888	102.404137	3313.705888	110.174927	3313.705888	95.354356	3313.705888	189.670591	3313.705888	112.040207	3313.705888	81.234376	3313.705888	189.670591	3313.705888	173.785297
3315.634704	101.860034	3315.634704	102.366007	3315.634704	110.194628	3315.634704	95.365045	3315.634704	189.668109	3315.634704	112.06789	3315.634704	81.225199	3315.634704	189.668109	3315.634704	173.761972
3317.56352	101.843687	3317.56352	102.33781	3317.56352	110.23063	3317.56352	95.372561	3317.56352	189.671033	3317.56352	112.106849	3317.56352	81.2117	3317.56352	189.671033	3317.56352	173.735523
3319.492336	101.820948	3319.492336	102.345316	3319.492336	110.252702	3319.492336	95.355918	3319.492336	189.675256	3319.492336	112.152714	3319.492336	81.197552	3319.492336	189.675256	3319.492336	173.70279
3321.421152	101.78929	3321.421152	102.395361	3321.421152	110.278404	3321.421152	95.333147	3321.421152	189.676914	3321.421152	112.189245	3321.421152	81.189412	3321.421152	189.676914	3321.421152	173.666548
3323.349968	101.749076	3323.349968	102.429159	3323.349968	110.323569	3323.349968	95.320431	3323.349968	189.671388	3323.349968	112.222739	3323.349968	81.191205	3323.349968	189.671388	3323.349968	173.634244
3325.278784	101.70556	3325.278784	102.402737	3325.278784	110.348489	3325.278784	95.310809	3325.278784	189.668497	3325.278784	112.264814	3325.278784	81.199845	3325.278784	189.668497	3325.278784	173.601025
3327.2076	101.665178	3327.2076	102.360373	3327.2076	110.355582	3327.2076	95.304347	3327.2076	189.674977	3327.2076	112.302885	3327.2076	81.211895	3327.2076	189.674977	3327.2076	173.567565
3329.136416	101.636087	3329.136416	102.317771	3329.136416	110.316847	3329.136416	95.285239	3329.136416	189.682387	3329.136416	112.342967	3329.136416	81.227728	3329.136416	189.682387	3329.136416	173.535639
3331.065232	101.624783	3331.065232	102.27813	3331.065232	110.251028	3331.065232	95.255681	3331.065232	189.686873	3331.065232	112.384827	3331.065232	81.245275	3331.065232	189.686873	3331.065232	173.507485
3332.994048	101.628432	3332.994048	102.244026	3332.994048	110.176808	3332.994048	95.238796	3332.994048	189.691295	3332.994048	112.429779	3332.994048	81.254841	3332.994048	189.691295	3332.994048	173.483078
3334.922864	101.637703	3334.922864	102.216791	3334.922864	110.079445	3334.922864	95.234361	3334.922864	189.700107	3334.922864	112.470059	3334.922864	81.247316	3334.922864	189.700107	3334.922864	173.463057
3336.85168	101.640613	3336.85168	102.205425	3336.85168	110.015411	3336.85168	95.240492	3336.85168	189.711908	3336.85168	112.507224	3336.85168	81.235737	3336.85168	189.711908	3336.85168	173.443149
3338.780496	101.629136	3338.780496	102.201041	3338.780496	109.989821	3338.780496	95.245431	3338.780496	189.704566	3338.780496	112.540053	3338.780496	81.228926	3338.780496	189.704566	3338.780496	173.418289
3340.709312	101.596359	3340.709312	102.208673	3340.709312	109.997063	3340.709312	95.245293	3340.709312	189.681965	3340.709312	112.571418	3340.709312	81.21911	3340.709312	189.681965	3340.709312	173.399693
3342.638128	101.54699	3342.638128	102.226073	3342.638128	110.034684	3342.638128	95.251117	3342.638128	189.662551	3342.638128	112.607105	3342.638128	81.20028	3342.638128	189.662551	3342.638128	173.390988
3344.566944	101.491806	3344.566944	102.247757	3344.566944	110.079894	3344.566944	95.254861	3344.566944	189.650726	3344.566944	112.649429	3344.566944	81.177813	3344.566944	189.650726	3344.566944	173.385698
3346.49576	101.437699	3346.49576	102.281755	3346.49576	110.121336	3346.49576	95.256842	3346.49576	189.647321	3346.49576	112.697061	3346.49576	81.164035	3346.49576	189.647321	3346.49576	173.383737
3348.424576	101.391404	3348.424576	102.314626	3348.424576	110.103594	3348.424576	95.259888	3348.424576	189.650748	3348.424576	112.757755	3348.424576	81.155987	3348.424576	189.650748	3348.424576	173.383482
3350.353392	101.35779	3350.353392	102.292401	3350.353392	110.055462	3350.353392	95.25376	3350.353392	189.655729	3350.353392	112.815273	3350.353392	81.141645	3350.353392	189.655729	3350.353392	173.390298
3352.282208	101.339395	3352.282208	102.228118	3352.282208	110.015549	3352.282208	95.245774	3352.282208	189.658216	3352.282208	112.862142	3352.282208	81.131201	3352.282208	189.658216	3352.282208	173.395151
3354.211024	101.332349	3354.211024	102.148143	3354.211024	109.961807	3354.211024	95.2442	3354.211024	189.662518	3354.211024	112.918418	3354.211024	81.128643	3354.211024	189.662518	3354.211024	173.394923
3356.13984	101.327617	3356.13984	102.053852	3356.13984	109.932837	3356.13984	95.23365	3356.13984	189.670285	3356.13984	112.990784	3356.13984	81.129215	3356.13984	189.670285	3356.13984	173.396473
3358.068656	101.320903	3358.068656	101.958158	3358.068656	109.890644	3358.068656	95.214266	3358.068656	189.669164	3358.068656	113.04765	3358.068656	81.133672	3358.068656	189.669164	3358.068656	173.401186
3359.997472	101.319096	3359.997472	101.898241	3359.997472	109.837913	3359.997472	95.199178	3359.997472	189.668951	3359.997472	113.101865	3359.997472	81.128749	3359.997472	189.668951	3359.997472	173.403485
3361.926288	101.322067	3361.926288	101.874175	3361.926288	109.816984	3361.926288	95.194424	3361.926288	189.682814	3361.926288	113.150532	3361.926288	81.114981	3361.926288	189.682814	3361.926288	173.409586
3363.855104	101.314683	3363.855104	101.875101	3363.855104	109.832986	3363.855104	95.205732	3363.855104	189.701837	3363.855104	113.189802	3363.855104	81.103777	3363.855104	189.701837	3363.855104	173.423967
3365.78392	101.303289	3365.78392	101.90149	3365.78392	109.874011	3365.78392	95.230406	3365.78392	189.699307	3365.78392	113.237674	3365.78392	81.101823	3365.78392	189.699307	3365.78392	173.437814
3367.712736	101.284469	3367.712736	101.941607	3367.712736	109.896439	3367.712736	95.244755	3367.712736	189.69159	3367.712736	113.291144	3367.712736	81.109842	3367.712736	189.69159	3367.712736	173.446388
3369.641552	101.25423	3369.641552	101.992111	3369.641552	109.914283	3369.641552	95.253922	3369.641552	189.689943	3369.641552	113.343792	3369.641552	81.121215	3369.641552	189.689943	3369.641552	173.455321
3371.570368	101.223132	3371.570368	102.02737	3371.570368	109.951283	3371.570368	95.284428	3371.570368	189.683938	3371.570368	113.392152	3371.570368	81.125887	3371.570368	189.683938	3371.570368	173.466987
3373.499184	101.193564	3373.499184	102.034142	3373.499184	109.977537	3373.499184	95.335614	3373.499184	189.675643	3373.499184	113.422888	3373.499184	81.12032	3373.499184	189.675643	3373.499184	173.47195
3375.428	101.159935	3375.428	102.024997	3375.428	109.993145	3375.428	95.352028	3375.428	189.671141	3375.428	113.442347	3375.428	81.120086	3375.428	189.671141	3375.428	173.467265
3377.356816	101.127447	3377.356816	102.035378	3377.356816	109.939421	3377.356816	95.354635	3377.356816	189.670203	3377.356816	113.467122	3377.356816	81.12381	3377.356816	189.670203	3377.356816	173.461155
3379.285632	101.097022	3379.285632	102.067528	3379.285632	109.868808	3379.285632	95.349384	3379.285632	189.671185	3379.285632	113.499388	3379.285632	81.11699	3379.285632	189.671185	3379.285632	173.454302
3381.214448	101.066826	3381.214448	102.027469	3381.214448	109.862034	3381.214448	95.328338	3381.214448	189.670521	3381.214448	113.54479	3381.214448	81.10224	3381.214448	189.670521	3381.214448	173.442954
3383.143264	101.040162	3383.143264	101.967846	3383.143264	109.887748	3383.143264	95.300553	3383.143264	189.674873	3383.143264	113.626648	3383.143264	81.095076	3383.143264	189.674873	3383.143264	173.43199
3385.07208	101.015665	3385.07208	101.894098	3385.07208	109.843132	3385.07208	95.270513	3385.07208	189.680611	3385.07208	113.714397	3385.07208	81.095672	3385.07208	189.680611	3385.07208	173.42375
3387.000896	100.991588	3387.000896	101.812865	3387.000896	109.780947	3387.000896	95.223647	3387.000896	189.682909	3387.000896	113.764761	3387.000896	81.089597	3387.000896	189.682909	3387.000896	173.410998
3388.929712	100.980025	3388.929712	101.731415	3388.929712	109.697363	3388.929712	95.17403	3388.929712	189.695638	3388.929712	113.786185	3388.929712	81.078258	3388.929712	189.695638	3388.929712	173.407699
3390.858528	100.977171	3390.858528	101.64666	3390.858528	109.603466	3390.858528	95.142368	3390.858528	189.725732	3390.858528	113.803727	3390.858528	81.075473	3390.858528	189.725732	3390.858528	173.409749
3392.787344	100.965913	3392.787344	101.563197	3392.787344	109.526826	3392.787344	95.127684	3392.787344	189.751392	3392.787344	113.821369	3392.787344	81.083103	3392.787344	189.751392	3392.787344	173.408426
3394.71616	100.948517	3394.71616	101.507274	3394.71616	109.458663	3394.71616	95.123573	3394.71616	189.748673	3394.71616	113.843835	3394.71616	81.096307	3394.71616	189.748673	3394.71616	173.398009
3396.644976	100.93101	3396.644976	101.493245	3396.644976	109.382533	3396.644976	95.123192	3396.644976	189.721975	3396.644976	113.872773	3396.644976	81.097332	3396.644976	189.721975	3396.644976	173.384615
3398.573792	100.911918	3398.573792	101.50836	3398.573792	109.385938	3398.573792	95.144097	3398.573792	189.695577	3398.573792	113.900937	3398.573792	81.081359	3398.573792	189.695577	3398.573792	173.369813
3400.502608	100.889926	3400.502608	101.528961	3400.502608	109.486356	3400.502608	95.21173	3400.502608	189.682761	3400.502608	113.92662	3400.502608	81.062609	3400.502608	189.682761	3400.502608	173.351876
3402.431424	100.863176	3402.431424	101.594737	3402.431424	109.60673	3402.431424	95.269083	3402.431424	189.686388	3402.431424	113.946796	3402.431424	81.049357	3402.431424	189.686388	3402.431424	173.327261
3404.36024	100.834558	3404.36024	101.718961	3404.36024	109.673052	3404.36024	95.265173	3404.36024	189.691248	3404.36024	113.960609	3404.36024	81.045035	3404.36024	189.691248	3404.36024	173.301478
3406.289056	100.800866	3406.289056	101.863603	3406.289056	109.740272	3406.289056	95.226194	3406.289056	189.691508	3406.289056	113.974121	3406.289056	81.050562	3406.289056	189.691508	3406.289056	173.286601
3408.217872	100.76204	3408.217872	101.91047	3408.217872	109.780521	3408.217872	95.209043	3408.217872	189.696907	3408.217872	113.985626	3408.217872	81.049517	3408.217872	189.696907	3408.217872	173.269738
3410.146688	100.729711	3410.146688	101.855003	3410.146688	109.822673	3410.146688	95.220197	3410.146688	189.705377	3410.146688	114.048611	3410.146688	81.043425	3410.146688	189.705377	3410.146688	173.236989
3412.075504	100.706058	3412.075504	101.73302	3412.075504	109.801549	3412.075504	95.21041	3412.075504	189.722801	3412.075504	114.091746	3412.075504	81.051258	3412.075504	189.722801	3412.075504	173.19599
3414.00432	100.694711	3414.00432	101.607705	3414.00432	109.655715	3414.00432	95.159063	3414.00432	189.742644	3414.00432	114.090973	3414.00432	81.073927	3414.00432	189.742644	3414.00432	173.157683
3415.933136	100.705081	3415.933136	101.511661	3415.933136	109.465427	3415.933136	95.126997	3415.933136	189.75167	3415.933136	114.091252	3415.933136	81.097801	3415.933136	189.75167	3415.933136	173.134072
3417.861952	100.702789	3417.861952	101.426638	3417.861952	109.34809	3417.861952	95.096527	3417.861952	189.786413	3417.861952	114.098584	3417.861952	81.111135	3417.861952	189.786413	3417.861952	173.119725
3419.790768	100.692961	3419.790768	101.35739	3419.790768	109.302178	3419.790768	95.064361	3419.790768	189.800763	3419.790768	114.111022	3419.790768	81.12501	3419.790768	189.800763	3419.790768	173.104771
3421.719584	100.687375	3421.719584	101.334137	3421.719584	109.306399	3421.719584	95.052615	3421.719584	189.773742	3421.719584	114.111873	3421.719584	81.116832	3421.719584	189.773742	3421.719584	173.083752
3423.6484	100.674015	3423.6484	101.355509	3423.6484	109.339866	3423.6484	95.056118	3423.6484	189.724658	3423.6484	114.105082	3423.6484	81.061971	3423.6484	189.724658	3423.6484	173.062475
3425.577216	100.648022	3425.577216	101.402972	3425.577216	109.408042	3425.577216	95.059708	3425.577216	189.683304	3425.577216	114.116769	3425.577216	80.997537	3425.577216	189.683304	3425.577216	173.040508
3427.506032	100.616737	3427.506032	101.473695	3427.506032	109.54045	3427.506032	95.100651	3427.506032	189.651375	3427.506032	114.123261	3427.506032	80.944636	3427.506032	189.651375	3427.506032	173.019505
3429.434848	100.575319	3429.434848	101.566539	3429.434848	109.687832	3429.434848	95.086267	3429.434848	189.621079	3429.434848	114.127261	3429.434848	80.901532	3429.434848	189.621079	3429.434848	172.998904
3431.363664	100.531012	3431.363664	101.650129	3431.363664	109.742396	3431.363664	95.010211	3431.363664	189.608558	3431.363664	114.118477	3431.363664	80.871211	3431.363664	189.608558	3431.363664	172.969711
3433.29248	100.489285	3433.29248	101.754785	3433.29248	109.699505	3433.29248	94.947778	3433.29248	189.608381	3433.29248	114.10889	3433.29248	80.863411	3433.29248	189.608381	3433.29248	172.947549
3435.221296	100.459626	3435.221296	101.644509	3435.221296	109.620311	3435.221296	94.918118	3435.221296	189.59875	3435.221296	114.091204	3435.221296	80.870964	3435.221296	189.59875	3435.221296	172.914043
3437.150112	100.441769	3437.150112	101.381874	3437.150112	109.624046	3437.150112	94.92081	3437.150112	189.586788	3437.150112	114.073573	3437.150112	80.873367	3437.150112	189.586788	3437.150112	172.854065
3439.078928	100.435272	3439.078928	101.184098	3439.078928	109.484969	3439.078928	94.934145	3439.078928	189.5713	3439.078928	114.059431	3439.078928	80.87237	3439.078928	189.5713	3439.078928	172.79871
3441.007744	100.434183	3441.007744	101.079472	3441.007744	109.23667	3441.007744	94.913846	3441.007744	189.55717	3441.007744	114.020789	3441.007744	80.875854	3441.007744	189.55717	3441.007744	172.758922
3442.93656	100.435062	3442.93656	101.036171	3442.93656	109.063168	3442.93656	94.865805	3442.93656	189.553067	3442.93656	114.002006	3442.93656	80.874877	3442.93656	189.553067	3442.93656	172.728447
3444.865376	100.432375	3444.865376	101.032907	3444.865376	109.004714	3444.865376	94.815935	3444.865376	189.561399	3444.865376	114.031935	3444.865376	80.856727	3444.865376	189.561399	3444.865376	172.697293
3446.794192	100.418235	3446.794192	101.063516	3446.794192	109.044133	3446.794192	94.791032	3446.794192	189.57753	3446.794192	114.051019	3446.794192	80.823314	3446.794192	189.57753	3446.794192	172.665461
3448.723008	100.411029	3448.723008	101.117238	3448.723008	109.118169	3448.723008	94.767068	3448.723008	189.580421	3448.723008	114.044442	3448.723008	80.806053	3448.723008	189.580421	3448.723008	172.6409
3450.651824	100.416025	3450.651824	101.148477	3450.651824	109.238698	3450.651824	94.737966	3450.651824	189.575455	3450.651824	114.056597	3450.651824	80.809374	3450.651824	189.575455	3450.651824	172.617877
3452.58064	100.401343	3452.58064	101.182905	3452.58064	109.390877	3452.58064	94.72874	3452.58064	189.581763	3452.58064	114.064471	3452.58064	80.828979	3452.58064	189.581763	3452.58064	172.592452
3454.509456	100.378207	3454.509456	101.247602	3454.509456	109.473083	3454.509456	94.755316	3454.509456	189.587305	3454.509456	114.045569	3454.509456	80.878795	3454.509456	189.587305	3454.509456	172.57626
3456.438272	100.380602	3456.438272	101.307816	3456.438272	109.544865	3456.438272	94.812561	3456.438272	189.586016	3456.438272	114.014461	3456.438272	80.924037	3456.438272	189.586016	3456.438272	172.564343
3458.367088	100.394575	3458.367088	101.37235	3458.367088	109.430178	3458.367088	94.870049	3458.367088	189.597255	3458.367088	113.968298	3458.367088	80.941187	3458.367088	189.597255	3458.367088	172.547531
3460.295904	100.400115	3460.295904	101.452518	3460.295904	109.292152	3460.295904	94.976366	3460.295904	189.606113	3460.295904	113.910209	3460.295904	80.958949	3460.295904	189.606113	3460.295904	172.536648
3462.22472	100.400309	3462.22472	101.404339	3462.22472	109.317055	3462.22472	95.101154	3462.22472	189.595265	3462.22472	113.857991	3462.22472	80.97908	3462.22472	189.595265	3462.22472	172.516603
3464.153536	100.39832	3464.153536	101.335136	3464.153536	109.4316	3464.153536	95.132488	3464.153536	189.583684	3464.153536	113.863238	3464.153536	80.990957	3464.153536	189.583684	3464.153536	172.481359
3466.082352	100.385474	3466.082352	101.401707	3466.082352	109.54216	3466.082352	95.10299	3466.082352	189.596714	3466.082352	113.94602	3466.082352	80.995855	3466.082352	189.596714	3466.082352	172.459844
3468.011168	100.362477	3468.011168	101.517677	3468.011168	109.600519	3468.011168	95.017171	3468.011168	189.623417	3468.011168	113.989073	3468.011168	80.999318	3468.011168	189.623417	3468.011168	172.463738
3469.939984	100.358814	3469.939984	101.514956	3469.939984	109.722639	3469.939984	94.923398	3469.939984	189.649513	3469.939984	113.93223	3469.939984	80.996719	3469.939984	189.649513	3469.939984	172.469647
3471.8688	100.384655	3471.8688	101.43772	3471.8688	109.841277	3471.8688	94.864919	3471.8688	189.694735	3471.8688	113.900134	3471.8688	80.956914	3471.8688	189.694735	3471.8688	172.454958
3473.797616	100.393411	3473.797616	101.372439	3473.797616	109.718036	3473.797616	94.830494	3473.797616	189.761167	3473.797616	113.891272	3473.797616	80.923469	3473.797616	189.761167	3473.797616	172.446101
3475.726432	100.383813	3475.726432	101.251469	3475.726432	109.498894	3475.726432	94.835583	3475.726432	189.776924	3475.726432	113.824544	3475.726432	80.956088	3475.726432	189.776924	3475.726432	172.443178
3477.655248	100.396751	3477.655248	101.060519	3477.655248	109.333265	3477.655248	94.851457	3477.655248	189.696556	3477.655248	113.739061	3477.655248	80.990102	3477.655248	189.696556	3477.655248	172.432553
3479.584064	100.395101	3479.584064	100.92941	3479.584064	109.193758	3479.584064	94.84873	3479.584064	189.640936	3479.584064	113.659414	3479.584064	80.962052	3479.584064	189.640936	3479.584064	172.424678
3481.51288	100.375718	3481.51288	100.89046	3481.51288	109.10499	3481.51288	94.885243	3481.51288	189.621674	3481.51288	113.592381	3481.51288	80.919888	3481.51288	189.621674	3481.51288	172.426808
3483.441696	100.354723	3483.441696	100.894003	3483.441696	109.082645	3483.441696	94.950546	3483.441696	189.578529	3483.441696	113.535858	3483.441696	80.888151	3483.441696	189.578529	3483.441696	172.425884
3485.370512	100.329776	3485.370512	100.923872	3485.370512	109.143347	3485.370512	94.920384	3485.370512	189.530474	3485.370512	113.476398	3485.370512	80.826947	3485.370512	189.530474	3485.370512	172.41909
3487.299328	100.307026	3487.299328	101.072865	3487.299328	109.256928	3487.299328	94.79179	3487.299328	189.48802	3487.299328	113.464359	3487.299328	80.727526	3487.299328	189.48802	3487.299328	172.412335
3489.228144	100.283305	3489.228144	101.274418	3489.228144	109.433577	3489.228144	94.72092	3489.228144	189.460747	3489.228144	113.453251	3489.228144	80.625305	3489.228144	189.460747	3489.228144	172.420402
3491.15696	100.282972	3491.15696	101.265858	3491.15696	109.633863	3491.15696	94.681648	3491.15696	189.43939	3491.15696	113.445138	3491.15696	80.548652	3491.15696	189.43939	3491.15696	172.426414
3493.085776	100.306053	3493.085776	101.135616	3493.085776	109.682252	3493.085776	94.58858	3493.085776	189.456718	3493.085776	113.396196	3493.085776	80.507501	3493.085776	189.456718	3493.085776	172.420806
3495.014592	100.323295	3495.014592	101.038589	3495.014592	109.477647	3495.014592	94.487132	3495.014592	189.514879	3495.014592	113.286281	3495.014592	80.513385	3495.014592	189.514879	3495.014592	172.430154
3496.943408	100.346704	3496.943408	100.832791	3496.943408	109.161159	3496.943408	94.417957	3496.943408	189.542781	3496.943408	113.147424	3496.943408	80.566828	3496.943408	189.542781	3496.943408	172.440606
3498.872224	100.355185	3498.872224	100.53414	3498.872224	108.940991	3498.872224	94.427387	3498.872224	189.551918	3498.872224	113.054347	3498.872224	80.623563	3498.872224	189.551918	3498.872224	172.428222
3500.80104	100.343641	3500.80104	100.302856	3500.80104	108.733928	3500.80104	94.424298	3500.80104	189.532294	3500.80104	112.963259	3500.80104	80.65025	3500.80104	189.532294	3500.80104	172.416534
3502.729856	100.325364	3502.729856	100.126502	3502.729856	108.485098	3502.729856	94.431805	3502.729856	189.471959	3502.729856	112.83951	3502.729856	80.634881	3502.729856	189.471959	3502.729856	172.405739
3504.658672	100.323456	3504.658672	100.073356	3504.658672	108.40054	3504.658672	94.503714	3504.658672	189.393263	3504.658672	112.699137	3504.658672	80.55565	3504.658672	189.393263	3504.658672	172.402979
3506.587488	100.310126	3506.587488	100.15598	3506.587488	108.481879	3506.587488	94.533651	3506.587488	189.358221	3506.587488	112.57578	3506.587488	80.422747	3506.587488	189.358221	3506.587488	172.414991
3508.516304	100.275988	3508.516304	100.424238	3508.516304	108.700523	3508.516304	94.509342	3508.516304	189.350027	3508.516304	112.545007	3508.516304	80.308325	3508.516304	189.350027	3508.516304	172.442418
3510.44512	100.256688	3510.44512	100.737378	3510.44512	109.056537	3510.44512	94.416574	3510.44512	189.30233	3510.44512	112.559225	3510.44512	80.23218	3510.44512	189.30233	3510.44512	172.476335
3512.373936	100.255534	3512.373936	100.902987	3512.373936	109.481956	3512.373936	94.29305	3512.373936	189.23012	3512.373936	112.507565	3512.373936	80.150416	3512.373936	189.23012	3512.373936	172.496625
3514.302752	100.273258	3514.302752	101.048273	3514.302752	109.685538	3514.302752	94.190465	3514.302752	189.197598	3514.302752	112.446499	3514.302752	80.088145	3514.302752	189.197598	3514.302752	172.524903
3516.231568	100.299346	3516.231568	100.951073	3516.231568	109.594577	3516.231568	94.164652	3516.231568	189.23221	3516.231568	112.479713	3516.231568	80.100747	3516.231568	189.23221	3516.231568	172.552354
3518.160384	100.315513	3518.160384	100.511156	3518.160384	109.484714	3518.160384	94.16596	3518.160384	189.256136	3518.160384	112.480054	3518.160384	80.177028	3518.160384	189.256136	3518.160384	172.536517
3520.0892	100.333608	3520.0892	100.087839	3520.0892	109.107996	3520.0892	94.158311	3520.0892	189.239229	3520.0892	112.394154	3520.0892	80.240883	3520.0892	189.239229	3520.0892	172.488513
3522.018016	100.366331	3522.018016	99.98305	3522.018016	108.527475	3522.018016	94.126963	3522.018016	189.236524	3522.018016	112.315982	3522.018016	80.248781	3522.018016	189.236524	3522.018016	172.470618
3523.946832	100.395516	3523.946832	99.837097	3523.946832	108.127988	3523.946832	94.041424	3523.946832	189.280662	3523.946832	112.293779	3523.946832	80.268669	3523.946832	189.280662	3523.946832	172.472358
3525.875648	100.413218	3525.875648	99.578598	3525.875648	108.076142	3525.875648	94.038795	3525.875648	189.30358	3525.875648	112.215227	3525.875648	80.268118	3525.875648	189.30358	3525.875648	172.440113
3527.804464	100.425558	3527.804464	99.509303	3527.804464	108.155849	3527.804464	94.09298	3527.804464	189.305892	3527.804464	112.11202	3527.804464	80.184755	3527.804464	189.305892	3527.804464	172.399852
3529.73328	100.445771	3529.73328	99.724727	3529.73328	108.293846	3529.73328	94.035384	3529.73328	189.333417	3529.73328	112.21496	3529.73328	80.08194	3529.73328	189.333417	3529.73328	172.387926
3531.662096	100.474734	3531.662096	100.124572	3531.662096	108.698987	3531.662096	93.94926	3531.662096	189.358532	3531.662096	112.431899	3531.662096	80.036585	3531.662096	189.358532	3531.662096	172.430815
3533.590912	100.495149	3533.590912	100.452407	3533.590912	109.21389	3533.590912	93.983496	3533.590912	189.320224	3533.590912	112.52422	3533.590912	80.023048	3533.590912	189.320224	3533.590912	172.491935
3535.519728	100.51696	3535.519728	100.649686	3535.519728	109.574752	3535.519728	94.055734	3535.519728	189.300606	3535.519728	112.532135	3535.519728	80.024524	3535.519728	189.300606	3535.519728	172.513855
3537.448544	100.549313	3537.448544	100.778399	3537.448544	109.685047	3537.448544	94.158345	3537.448544	189.398756	3537.448544	112.555882	3537.448544	80.097551	3537.448544	189.398756	3537.448544	172.517915
3539.37736	100.59164	3539.37736	100.824547	3539.37736	109.415338	3539.37736	94.31069	3539.37736	189.473175	3539.37736	112.562272	3539.37736	80.251969	3539.37736	189.473175	3539.37736	172.538673
3541.306176	100.615301	3541.306176	100.697996	3541.306176	109.146332	3541.306176	94.532025	3541.306176	189.448409	3541.306176	112.475865	3541.306176	80.330117	3541.306176	189.448409	3541.306176	172.541132
3543.234992	100.627747	3543.234992	100.425344	3543.234992	109.088542	3543.234992	94.668401	3543.234992	189.412764	3543.234992	112.402103	3543.234992	80.270028	3543.234992	189.412764	3543.234992	172.514338
3545.163808	100.659906	3545.163808	100.231531	3545.163808	109.039652	3545.163808	94.693525	3545.163808	189.404769	3545.163808	112.391648	3545.163808	80.236785	3545.163808	189.404769	3545.163808	172.482933
3547.092624	100.707416	3547.092624	100.235672	3547.092624	108.883721	3547.092624	94.761196	3547.092624	189.434585	3547.092624	112.301679	3547.092624	80.205069	3547.092624	189.434585	3547.092624	172.477265
3549.02144	100.755887	3549.02144	100.318147	3549.02144	108.821321	3549.02144	94.686987	3549.02144	189.48615	3549.02144	112.182278	3549.02144	80.124173	3549.02144	189.48615	3549.02144	172.491927
3550.950256	100.794044	3550.950256	100.358116	3550.950256	108.986046	3550.950256	94.469136	3550.950256	189.552271	3550.950256	112.305123	3550.950256	80.01868	3550.950256	189.552271	3550.950256	172.513403
3552.879072	100.830472	3552.879072	100.513656	3552.879072	109.209061	3552.879072	94.274652	3552.879072	189.562216	3552.879072	112.432599	3552.879072	79.907218	3552.879072	189.562216	3552.879072	172.58951
3554.807888	100.854956	3554.807888	100.617729	3554.807888	109.439157	3554.807888	94.158382	3554.807888	189.488371	3554.807888	112.457783	3554.807888	79.807282	3554.807888	189.488371	3554.807888	172.703061
3556.736704	100.882013	3556.736704	100.592972	3556.736704	109.698324	3556.736704	94.017027	3556.736704	189.4173	3556.736704	112.480406	3556.736704	79.782647	3556.736704	189.4173	3556.736704	172.733918
3558.66552	100.882016	3558.66552	100.45384	3558.66552	109.614434	3558.66552	93.888285	3558.66552	189.437813	3558.66552	112.56818	3558.66552	79.867365	3558.66552	189.437813	3558.66552	172.724643
3560.594336	100.868733	3560.594336	100.18955	3560.594336	109.345977	3560.594336	93.876289	3560.594336	189.428943	3560.594336	112.590575	3560.594336	79.956554	3560.594336	189.428943	3560.594336	172.694668
3562.523152	100.881207	3562.523152	99.925465	3562.523152	109.114231	3562.523152	93.899254	3562.523152	189.373777	3562.523152	112.532157	3562.523152	79.909298	3562.523152	189.373777	3562.523152	172.650182
3564.451968	100.921649	3564.451968	99.875757	3564.451968	108.841763	3564.451968	93.892603	3564.451968	189.357766	3564.451968	112.506806	3564.451968	79.867025	3564.451968	189.357766	3564.451968	172.638622
3566.380784	100.961545	3566.380784	99.920192	3566.380784	108.724461	3566.380784	93.840725	3566.380784	189.369038	3566.380784	112.40737	3566.380784	79.929135	3566.380784	189.369038	3566.380784	172.660332
3568.3096	100.976272	3568.3096	99.844666	3568.3096	108.782926	3568.3096	93.888346	3568.3096	189.365105	3568.3096	112.22206	3568.3096	79.965252	3568.3096	189.365105	3568.3096	172.647947
3570.238416	100.984837	3570.238416	99.83522	3570.238416	108.907411	3570.238416	93.88591	3570.238416	189.380067	3570.238416	112.097199	3570.238416	79.909965	3570.238416	189.380067	3570.238416	172.632348
3572.167232	101.003728	3572.167232	100.032195	3572.167232	109.000082	3572.167232	93.845677	3572.167232	189.419734	3572.167232	112.096986	3572.167232	79.83963	3572.167232	189.419734	3572.167232	172.666857
3574.096048	101.019401	3574.096048	100.432632	3574.096048	109.200419	3574.096048	93.827474	3574.096048	189.418048	3574.096048	112.010851	3574.096048	79.803036	3574.096048	189.418048	3574.096048	172.814307
3576.024864	101.039531	3576.024864	100.547565	3576.024864	109.629359	3576.024864	93.897617	3576.024864	189.332104	3576.024864	111.938995	3576.024864	79.738104	3576.024864	189.332104	3576.024864	172.927741
3577.95368	101.054112	3577.95368	100.640775	3577.95368	109.908824	3577.95368	93.992176	3577.95368	189.246298	3577.95368	111.937521	3577.95368	79.703929	3577.95368	189.246298	3577.95368	172.964605
3579.882496	101.078286	3579.882496	100.812189	3579.882496	109.633721	3579.882496	94.098424	3579.882496	189.234368	3579.882496	111.874647	3579.882496	79.760384	3579.882496	189.234368	3579.882496	173.040694
3581.811312	101.157235	3581.811312	100.755465	3581.811312	109.369818	3581.811312	94.172036	3581.811312	189.233387	3581.811312	111.890231	3581.811312	79.842673	3581.811312	189.233387	3581.811312	173.095048
3583.740128	101.239835	3583.740128	100.527708	3583.740128	109.325601	3583.740128	94.22388	3583.740128	189.226834	3583.740128	111.945017	3583.740128	79.893277	3583.740128	189.226834	3583.740128	173.021711
3585.668944	101.273697	3585.668944	100.386295	3585.668944	109.364167	3585.668944	94.210949	3585.668944	189.247759	3585.668944	111.873407	3585.668944	79.971432	3585.668944	189.247759	3585.668944	172.947945
3587.59776	101.30879	3587.59776	100.308622	3587.59776	109.284258	3587.59776	94.07186	3587.59776	189.247313	3587.59776	111.749089	3587.59776	80.014099	3587.59776	189.247313	3587.59776	172.936346
3589.526576	101.335372	3589.526576	100.187817	3589.526576	109.189438	3589.526576	93.934285	3589.526576	189.26612	3589.526576	111.518263	3589.526576	79.985127	3589.526576	189.26612	3589.526576	172.918665
3591.455392	101.322308	3591.455392	100.039316	3591.455392	109.105093	3591.455392	93.856299	3591.455392	189.311426	3591.455392	111.339701	3591.455392	79.819721	3591.455392	189.311426	3591.455392	172.864978
3593.384208	101.293481	3593.384208	100.004705	3593.384208	108.954917	3593.384208	93.89362	3593.384208	189.345826	3593.384208	111.450293	3593.384208	79.552974	3593.384208	189.345826	3593.384208	172.853282
3595.313024	101.263763	3595.313024	100.035507	3595.313024	108.910543	3595.313024	93.964197	3595.313024	189.343392	3595.313024	111.519144	3595.313024	79.367023	3595.313024	189.343392	3595.313024	172.91847
3597.24184	101.247076	3597.24184	100.055554	3597.24184	109.089643	3597.24184	93.935052	3597.24184	189.2127	3597.24184	111.596744	3597.24184	79.283136	3597.24184	189.2127	3597.24184	172.973697
3599.170656	101.251423	3599.170656	100.273024	3599.170656	109.031797	3599.170656	93.911188	3599.170656	189.095264	3599.170656	111.644336	3599.170656	79.296908	3599.170656	189.095264	3599.170656	173.079197
3601.099472	101.297683	3601.099472	100.463912	3601.099472	109.049273	3601.099472	93.910516	3601.099472	189.14372	3601.099472	111.74036	3601.099472	79.387193	3601.099472	189.14372	3601.099472	173.229846
3603.028288	101.386965	3603.028288	100.250406	3603.028288	109.366489	3603.028288	93.889235	3603.028288	189.195194	3603.028288	111.906423	3603.028288	79.33227	3603.028288	189.195194	3603.028288	173.197332
3604.957104	101.484824	3604.957104	100.199578	3604.957104	109.595338	3604.957104	93.888739	3604.957104	189.250253	3604.957104	111.917309	3604.957104	79.219767	3604.957104	189.250253	3604.957104	173.1474
3606.88592	101.584531	3606.88592	100.30649	3606.88592	109.516889	3606.88592	93.871624	3606.88592	189.298253	3606.88592	111.711025	3606.88592	79.263242	3606.88592	189.298253	3606.88592	173.214279
3608.814736	101.66812	3608.814736	100.297737	3608.814736	109.558593	3608.814736	93.739382	3608.814736	189.343657	3608.814736	111.411593	3608.814736	79.300796	3608.814736	189.343657	3608.814736	173.21636
3610.743552	101.734424	3610.743552	100.177692	3610.743552	109.617005	3610.743552	93.806878	3610.743552	189.397116	3610.743552	111.240144	3610.743552	79.290561	3610.743552	189.397116	3610.743552	173.118138
3612.672368	101.773039	3612.672368	100.068138	3612.672368	109.398266	3612.672368	93.973992	3612.672368	189.474022	3612.672368	111.391468	3612.672368	79.243574	3612.672368	189.474022	3612.672368	173.011931
3614.601184	101.795216	3614.601184	100.052503	3614.601184	109.173134	3614.601184	94.144486	3614.601184	189.557238	3614.601184	111.632727	3614.601184	79.327051	3614.601184	189.557238	3614.601184	173.041453
3616.53	101.832474	3616.53	100.165223	3616.53	109.130205	3616.53	94.248387	3616.53	189.587052	3616.53	111.670322	3616.53	79.502518	3616.53	189.587052	3616.53	173.18534
3618.458816	101.909497	3618.458816	100.342535	3618.458816	109.374734	3618.458816	94.362545	3618.458816	189.560916	3618.458816	111.640826	3618.458816	79.693009	3618.458816	189.560916	3618.458816	173.169535
3620.387632	101.971583	3620.387632	100.681581	3620.387632	109.821555	3620.387632	94.473084	3620.387632	189.694229	3620.387632	111.757426	3620.387632	79.911897	3620.387632	189.694229	3620.387632	173.189027
3622.316448	102.052273	3622.316448	100.973831	3622.316448	110.256428	3622.316448	94.571907	3622.316448	189.888939	3622.316448	111.926811	3622.316448	80.083414	3622.316448	189.888939	3622.316448	173.234143
3624.245264	102.150246	3624.245264	101.225315	3624.245264	110.567222	3624.245264	94.644869	3624.245264	189.978464	3624.245264	112.102583	3624.245264	80.00091	3624.245264	189.978464	3624.245264	173.221567
3626.17408	102.237765	3626.17408	101.517377	3626.17408	110.648079	3626.17408	94.713064	3626.17408	189.958872	3626.17408	112.066979	3626.17408	79.877056	3626.17408	189.958872	3626.17408	173.258841
3628.102896	102.300134	3628.102896	101.667152	3628.102896	110.81245	3628.102896	94.823998	3628.102896	190.00978	3628.102896	111.985097	3628.102896	79.981023	3628.102896	190.00978	3628.102896	173.304608
3630.031712	102.349355	3630.031712	101.614248	3630.031712	110.802989	3630.031712	94.971682	3630.031712	190.067694	3630.031712	111.891745	3630.031712	80.046463	3630.031712	190.067694	3630.031712	173.305393
3631.960528	102.376192	3631.960528	101.534119	3631.960528	110.527138	3631.960528	95.084744	3631.960528	190.086495	3631.960528	111.831163	3631.960528	80.011331	3631.960528	190.086495	3631.960528	173.355642
3633.889344	102.390101	3633.889344	101.467261	3633.889344	110.080006	3633.889344	95.054814	3633.889344	190.113733	3633.889344	111.944188	3633.889344	80.048934	3633.889344	190.113733	3633.889344	173.493574
3635.81816	102.405544	3635.81816	101.434408	3635.81816	109.629015	3635.81816	94.924887	3635.81816	190.17357	3635.81816	111.8769	3635.81816	80.141342	3635.81816	190.17357	3635.81816	173.662289
3637.746976	102.450476	3637.746976	101.254655	3637.746976	109.686749	3637.746976	94.893198	3637.746976	190.19932	3637.746976	111.772018	3637.746976	80.19936	3637.746976	190.19932	3637.746976	173.806035
3639.675792	102.526201	3639.675792	101.039072	3639.675792	110.211873	3639.675792	94.863562	3639.675792	190.211446	3639.675792	111.975603	3639.675792	80.311836	3639.675792	190.211446	3639.675792	173.812055
3641.604608	102.590959	3641.604608	101.018764	3641.604608	110.367423	3641.604608	94.779752	3641.604608	190.330409	3641.604608	112.138648	3641.604608	80.44677	3641.604608	190.330409	3641.604608	173.877078
3643.533424	102.667914	3643.533424	101.142679	3643.533424	110.326781	3643.533424	94.705461	3643.533424	190.361905	3643.533424	112.363579	3643.533424	80.444873	3643.533424	190.361905	3643.533424	174.026844
3645.46224	102.749463	3645.46224	101.259804	3645.46224	110.381445	3645.46224	94.669736	3645.46224	190.326764	3645.46224	112.540643	3645.46224	80.428072	3645.46224	190.326764	3645.46224	173.913384
3647.391056	102.800734	3647.391056	101.394932	3647.391056	110.610921	3647.391056	94.693135	3647.391056	190.506723	3647.391056	112.553205	3647.391056	80.656527	3647.391056	190.506723	3647.391056	173.817246
3649.319872	102.836096	3649.319872	101.470706	3649.319872	110.729241	3649.319872	94.794482	3649.319872	190.659187	3649.319872	112.471146	3649.319872	80.726985	3649.319872	190.659187	3649.319872	173.740286
3651.248688	102.823183	3651.248688	101.573841	3651.248688	110.741862	3651.248688	94.907514	3651.248688	190.724431	3651.248688	112.363055	3651.248688	80.538914	3651.248688	190.724431	3651.248688	173.673943
3653.177504	102.78607	3653.177504	101.624032	3653.177504	110.559672	3653.177504	94.959264	3653.177504	190.761648	3653.177504	112.478251	3653.177504	80.365773	3653.177504	190.761648	3653.177504	173.627623
3655.10632	102.753959	3655.10632	101.690278	3655.10632	110.415604	3655.10632	94.988854	3655.10632	190.797551	3655.10632	112.757729	3655.10632	80.343044	3655.10632	190.797551	3655.10632	173.661748
3657.035136	102.737628	3657.035136	101.810746	3657.035136	110.509449	3657.035136	95.214093	3657.035136	190.849428	3657.035136	112.884377	3657.035136	80.498339	3657.035136	190.849428	3657.035136	173.881058
3658.963952	102.793865	3658.963952	101.857262	3658.963952	110.829128	3658.963952	95.436417	3658.963952	190.905673	3658.963952	112.811288	3658.963952	80.628486	3658.963952	190.905673	3658.963952	174.016906
3660.892768	102.903429	3660.892768	102.085444	3660.892768	110.965977	3660.892768	95.590164	3660.892768	190.974955	3660.892768	112.711495	3660.892768	80.82736	3660.892768	190.974955	3660.892768	174.228504
3662.821584	103.011284	3662.821584	102.511689	3662.821584	110.797489	3662.821584	95.644039	3662.821584	191.062623	3662.821584	112.641325	3662.821584	80.946741	3662.821584	191.062623	3662.821584	174.659092
3664.7504	103.098595	3664.7504	102.706407	3664.7504	111.035663	3664.7504	95.666751	3664.7504	191.104213	3664.7504	112.856971	3664.7504	80.962254	3664.7504	191.104213	3664.7504	174.726898
3666.679216	103.14846	3666.679216	102.83916	3666.679216	111.617545	3666.679216	95.668147	3666.679216	191.108535	3666.679216	113.127032	3666.679216	80.962354	3666.679216	191.108535	3666.679216	174.543532
3668.608032	103.173877	3668.608032	102.927547	3668.608032	111.956995	3668.608032	95.618536	3668.608032	191.085106	3668.608032	113.026407	3668.608032	81.024294	3668.608032	191.085106	3668.608032	174.395846
3670.536848	103.186875	3670.536848	102.949585	3670.536848	112.114315	3670.536848	95.576219	3670.536848	191.006	3670.536848	112.868077	3670.536848	81.006594	3670.536848	191.006	3670.536848	174.308525
3672.465664	103.190905	3672.465664	102.799359	3672.465664	111.971327	3672.465664	95.563995	3672.465664	190.948633	3672.465664	112.653159	3672.465664	80.862065	3672.465664	190.948633	3672.465664	174.110381
3674.39448	103.177681	3674.39448	102.563517	3674.39448	111.623079	3674.39448	95.578464	3674.39448	190.959731	3674.39448	112.629136	3674.39448	80.645922	3674.39448	190.959731	3674.39448	174.009407
3676.323296	103.160517	3676.323296	102.474718	3676.323296	111.011252	3676.323296	95.596497	3676.323296	191.039025	3676.323296	112.756197	3676.323296	80.558347	3676.323296	191.039025	3676.323296	174.097981
3678.252112	103.164053	3678.252112	102.397247	3678.252112	110.674231	3678.252112	95.538976	3678.252112	191.067313	3678.252112	112.77466	3678.252112	80.621378	3678.252112	191.067313	3678.252112	174.143078
3680.180928	103.21223	3680.180928	102.269213	3680.180928	110.815138	3680.180928	95.400247	3680.180928	190.934643	3680.180928	112.644257	3680.180928	80.635867	3680.180928	190.934643	3680.180928	174.098691
3682.109744	103.250857	3682.109744	102.203898	3682.109744	110.801217	3682.109744	95.279838	3682.109744	190.853907	3682.109744	112.562248	3682.109744	80.733087	3682.109744	190.853907	3682.109744	174.114127
3684.03856	103.287869	3684.03856	102.12686	3684.03856	110.959791	3684.03856	95.210716	3684.03856	190.896095	3684.03856	112.688009	3684.03856	80.923736	3684.03856	190.896095	3684.03856	174.196259
3685.967376	103.324604	3685.967376	101.931192	3685.967376	111.298422	3685.967376	95.144999	3685.967376	190.968027	3685.967376	112.912962	3685.967376	80.959514	3685.967376	190.968027	3685.967376	174.110939
3687.896192	103.344092	3687.896192	101.989521	3687.896192	111.328312	3687.896192	95.090169	3687.896192	190.906158	3687.896192	112.889806	3687.896192	80.944382	3687.896192	190.906158	3687.896192	174.195912
3689.825008	103.343428	3689.825008	102.237712	3689.825008	111.162435	3689.825008	95.06843	3689.825008	190.816083	3689.825008	112.762085	3689.825008	81.064841	3689.825008	190.816083	3689.825008	174.423964
3691.753824	103.338489	3691.753824	102.378183	3691.753824	110.975255	3691.753824	95.113288	3691.753824	190.741698	3691.753824	112.657917	3691.753824	81.169713	3691.753824	190.741698	3691.753824	174.30178
3693.68264	103.328473	3693.68264	102.360232	3693.68264	110.752672	3693.68264	95.293408	3693.68264	190.707746	3693.68264	112.462964	3693.68264	81.164033	3693.68264	190.707746	3693.68264	174.15109
3695.611456	103.322155	3695.611456	102.280117	3695.611456	110.466317	3695.611456	95.561801	3695.611456	190.69219	3695.611456	112.142239	3695.611456	81.157737	3695.611456	190.69219	3695.611456	174.058689
3697.540272	103.296365	3697.540272	102.359959	3697.540272	110.457673	3697.540272	95.636294	3697.540272	190.744839	3697.540272	111.990337	3697.540272	81.205898	3697.540272	190.744839	3697.540272	174.12614
3699.469088	103.27012	3699.469088	102.390197	3699.469088	110.812545	3699.469088	95.62449	3699.469088	190.781571	3699.469088	112.142379	3699.469088	81.049879	3699.469088	190.781571	3699.469088	174.272349
3701.397904	103.252052	3701.397904	102.501972	3701.397904	111.331441	3701.397904	95.5501	3701.397904	190.652784	3701.397904	112.222556	3701.397904	80.882523	3701.397904	190.652784	3701.397904	174.392411
3703.32672	103.271004	3703.32672	102.695015	3703.32672	111.708495	3703.32672	95.507599	3703.32672	190.612535	3703.32672	112.171657	3703.32672	80.949997	3703.32672	190.612535	3703.32672	174.462222
3705.255536	103.361316	3705.255536	102.731866	3705.255536	111.889183	3705.255536	95.461224	3705.255536	190.776255	3705.255536	112.063141	3705.255536	80.985187	3705.255536	190.776255	3705.255536	174.38304
3707.184352	103.451177	3707.184352	102.666515	3707.184352	111.758068	3707.184352	95.490279	3707.184352	190.882023	3707.184352	112.059049	3707.184352	81.035095	3707.184352	190.882023	3707.184352	174.244957
3709.113168	103.496072	3709.113168	102.631332	3709.113168	111.461726	3709.113168	95.506365	3709.113168	190.906552	3709.113168	112.121952	3709.113168	81.023467	3709.113168	190.906552	3709.113168	174.171565
3711.041984	103.482529	3711.041984	102.515104	3711.041984	111.26035	3711.041984	95.349522	3711.041984	190.856044	3711.041984	112.244967	3711.041984	80.776804	3711.041984	190.856044	3711.041984	174.132577
3712.9708	103.433678	3712.9708	102.364559	3712.9708	111.144891	3712.9708	95.167487	3712.9708	190.704922	3712.9708	112.549625	3712.9708	80.498112	3712.9708	190.704922	3712.9708	174.126374
3714.899616	103.413549	3714.899616	102.115035	3714.899616	110.989431	3714.899616	95.139718	3714.899616	190.560295	3714.899616	112.832672	3714.899616	80.356251	3714.899616	190.560295	3714.899616	174.130064
3716.828432	103.399107	3716.828432	101.794073	3716.828432	110.850579	3716.828432	95.257109	3716.828432	190.678732	3716.828432	113.085868	3716.828432	80.326121	3716.828432	190.678732	3716.828432	174.013585
3718.757248	103.392599	3718.757248	101.549337	3718.757248	110.627912	3718.757248	95.279449	3718.757248	190.789067	3718.757248	113.141931	3718.757248	80.107236	3718.757248	190.789067	3718.757248	173.91386
3720.686064	103.449432	3720.686064	101.592161	3720.686064	110.677713	3720.686064	95.317479	3720.686064	190.783286	3720.686064	113.157049	3720.686064	79.978314	3720.686064	190.783286	3720.686064	173.973886
3722.61488	103.505394	3722.61488	101.951086	3722.61488	110.834939	3722.61488	95.22008	3722.61488	190.860939	3722.61488	113.335957	3722.61488	80.03247	3722.61488	190.860939	3722.61488	174.226619
3724.543696	103.558264	3724.543696	102.260432	3724.543696	111.202281	3724.543696	95.036145	3724.543696	190.946349	3724.543696	113.673325	3724.543696	79.919678	3724.543696	190.946349	3724.543696	174.405992
3726.472512	103.607867	3726.472512	102.423183	3726.472512	111.789139	3726.472512	95.062041	3726.472512	190.978977	3726.472512	113.928391	3726.472512	79.638138	3726.472512	190.978977	3726.472512	174.327627
3728.401328	103.65677	3728.401328	102.348825	3728.401328	111.978415	3728.401328	95.205272	3728.401328	190.998625	3728.401328	113.96481	3728.401328	79.575416	3728.401328	190.998625	3728.401328	174.034625
3730.330144	103.693279	3730.330144	102.177218	3730.330144	112.097096	3730.330144	95.425847	3730.330144	191.092788	3730.330144	113.858879	3730.330144	79.680739	3730.330144	191.092788	3730.330144	173.87353
3732.25896	103.720056	3732.25896	102.297018	3732.25896	111.972645	3732.25896	95.697126	3732.25896	191.159708	3732.25896	113.793719	3732.25896	79.702132	3732.25896	191.159708	3732.25896	173.967388
3734.187776	103.726103	3734.187776	102.551254	3734.187776	111.774134	3734.187776	95.875938	3734.187776	191.13698	3734.187776	113.87963	3734.187776	79.584152	3734.187776	191.13698	3734.187776	173.90345
3736.116592	103.707159	3736.116592	102.831534	3736.116592	111.775693	3736.116592	95.986278	3736.116592	191.142808	3736.116592	113.932591	3736.116592	79.47617	3736.116592	191.142808	3736.116592	173.894788
3738.045408	103.679471	3738.045408	103.184211	3738.045408	111.603437	3738.045408	96.069603	3738.045408	191.223024	3738.045408	113.974107	3738.045408	79.576184	3738.045408	191.223024	3738.045408	173.993286
3739.974224	103.67538	3739.974224	103.288264	3739.974224	111.694464	3739.974224	96.1668	3739.974224	191.33645	3739.974224	113.854021	3739.974224	79.764957	3739.974224	191.33645	3739.974224	173.997087
3741.90304	103.694062	3741.90304	103.205625	3741.90304	112.290825	3741.90304	96.224418	3741.90304	191.413794	3741.90304	113.668143	3741.90304	79.936735	3741.90304	191.413794	3741.90304	173.789413
3743.831856	103.690373	3743.831856	103.147798	3743.831856	112.856216	3743.831856	96.186767	3743.831856	191.387096	3743.831856	113.671587	3743.831856	80.03324	3743.831856	191.387096	3743.831856	173.601542
3745.760672	103.669609	3745.760672	103.246318	3745.760672	113.252361	3745.760672	96.099552	3745.760672	191.324102	3745.760672	113.719022	3745.760672	80.071361	3745.760672	191.324102	3745.760672	173.645334
3747.689488	103.641215	3747.689488	103.403495	3747.689488	113.065962	3747.689488	95.923166	3747.689488	191.276818	3747.689488	113.913262	3747.689488	80.171981	3747.689488	191.276818	3747.689488	173.761637
3749.618304	103.611337	3749.618304	103.42147	3749.618304	112.746803	3749.618304	95.776484	3749.618304	191.265928	3749.618304	113.975733	3749.618304	80.329588	3749.618304	191.265928	3749.618304	173.764211
3751.54712	103.580057	3751.54712	103.158888	3751.54712	111.931142	3751.54712	95.816923	3751.54712	191.319225	3751.54712	113.767299	3751.54712	80.522749	3751.54712	191.319225	3751.54712	173.625377
3753.475936	103.550022	3753.475936	102.823675	3753.475936	111.261308	3753.475936	95.937805	3753.475936	191.311363	3753.475936	113.525987	3753.475936	80.706952	3753.475936	191.311363	3753.475936	173.487523
3755.404752	103.499325	3755.404752	102.380363	3755.404752	111.063262	3755.404752	95.95432	3755.404752	191.288855	3755.404752	113.330656	3755.404752	80.841379	3755.404752	191.288855	3755.404752	173.44269
3757.333568	103.429267	3757.333568	102.159939	3757.333568	110.860589	3757.333568	95.721448	3757.333568	191.250384	3757.333568	113.079129	3757.333568	81.009017	3757.333568	191.250384	3757.333568	173.634245
3759.262384	103.349183	3759.262384	102.213219	3759.262384	110.945193	3759.262384	95.492728	3759.262384	191.203372	3759.262384	112.896831	3759.262384	81.094753	3759.262384	191.203372	3759.262384	173.798414
3761.1912	103.297618	3761.1912	102.219327	3761.1912	111.321364	3761.1912	95.278904	3761.1912	191.245164	3761.1912	112.680675	3761.1912	81.119706	3761.1912	191.245164	3761.1912	173.74281
3763.120016	103.283365	3763.120016	102.197131	3763.120016	111.345333	3763.120016	95.210434	3763.120016	191.323192	3763.120016	112.338252	3763.120016	81.294787	3763.120016	191.323192	3763.120016	173.854105
3765.048832	103.322842	3765.048832	102.357332	3765.048832	111.360278	3765.048832	95.387744	3765.048832	191.303709	3765.048832	112.175703	3765.048832	81.454533	3765.048832	191.303709	3765.048832	174.048243
3766.977648	103.35109	3766.977648	102.416977	3766.977648	111.351493	3766.977648	95.503125	3766.977648	191.17499	3766.977648	112.075576	3766.977648	81.510118	3766.977648	191.17499	3766.977648	174.120915
3768.906464	103.312735	3768.906464	102.551888	3768.906464	111.4	3768.906464	95.56358	3768.906464	191.060967	3768.906464	112.075165	3768.906464	81.501012	3768.906464	191.060967	3768.906464	174.045239
3770.83528	103.267512	3770.83528	102.730796	3770.83528	111.341411	3770.83528	95.663342	3770.83528	190.934209	3770.83528	112.354428	3770.83528	81.698633	3770.83528	190.934209	3770.83528	174.058937
3772.764096	103.194347	3772.764096	102.847899	3772.764096	111.296812	3772.764096	95.641831	3772.764096	191.031995	3772.764096	112.525629	3772.764096	81.892924	3772.764096	191.031995	3772.764096	174.136046
3774.692912	103.143734	3774.692912	102.778344	3774.692912	111.45647	3774.692912	95.588302	3774.692912	191.229951	3774.692912	112.290836	3774.692912	81.794244	3774.692912	191.229951	3774.692912	174.115251
3776.621728	103.135281	3776.621728	102.721101	3776.621728	111.410222	3776.621728	95.577265	3776.621728	191.233731	3776.621728	111.914896	3776.621728	81.564778	3776.621728	191.233731	3776.621728	174.026849
3778.550544	103.135202	3778.550544	102.676729	3778.550544	111.368414	3778.550544	95.614053	3778.550544	191.360827	3778.550544	111.697767	3778.550544	81.658253	3778.550544	191.360827	3778.550544	174.024541
3780.47936	103.150806	3780.47936	102.568444	3780.47936	111.36528	3780.47936	95.513736	3780.47936	191.537112	3780.47936	111.876444	3780.47936	81.689278	3780.47936	191.537112	3780.47936	174.014042
3782.408176	103.192021	3782.408176	102.563855	3782.408176	111.224173	3782.408176	95.516129	3782.408176	191.555474	3782.408176	112.03333	3782.408176	81.479696	3782.408176	191.555474	3782.408176	174.051598
3784.336992	103.221322	3784.336992	102.613968	3784.336992	111.016536	3784.336992	95.554194	3784.336992	191.48694	3784.336992	112.215631	3784.336992	81.390117	3784.336992	191.48694	3784.336992	174.141041
3786.265808	103.262335	3786.265808	102.523715	3786.265808	110.911192	3786.265808	95.548688	3786.265808	191.457822	3786.265808	112.655562	3786.265808	81.483942	3786.265808	191.457822	3786.265808	174.07106
3788.194624	103.306511	3788.194624	102.522475	3788.194624	110.991656	3788.194624	95.598914	3788.194624	191.527204	3788.194624	113.020839	3788.194624	81.612527	3788.194624	191.527204	3788.194624	174.165746
3790.12344	103.359004	3790.12344	102.516989	3790.12344	111.08073	3790.12344	95.694593	3790.12344	191.522793	3790.12344	113.085965	3790.12344	81.535492	3790.12344	191.522793	3790.12344	174.231614
3792.052256	103.379564	3792.052256	102.61486	3792.052256	111.412066	3792.052256	95.713858	3792.052256	191.554384	3792.052256	113.029816	3792.052256	81.520244	3792.052256	191.554384	3792.052256	174.198099
3793.981072	103.400378	3793.981072	102.813254	3793.981072	111.665512	3793.981072	95.63385	3793.981072	191.652026	3793.981072	113.032602	3793.981072	81.504995	3793.981072	191.652026	3793.981072	174.265638
3795.909888	103.419205	3795.909888	103.054775	3795.909888	111.782091	3795.909888	95.574463	3795.909888	191.701941	3795.909888	113.095972	3795.909888	81.315579	3795.909888	191.701941	3795.909888	174.182874
3797.838704	103.417828	3797.838704	103.267551	3797.838704	111.940187	3797.838704	95.68075	3797.838704	191.737826	3797.838704	112.988204	3797.838704	81.284855	3797.838704	191.737826	3797.838704	174.052784
3799.76752	103.412364	3799.76752	103.261365	3799.76752	112.031865	3799.76752	95.820665	3799.76752	191.758566	3799.76752	112.840184	3799.76752	81.315334	3799.76752	191.758566	3799.76752	173.903308
3801.696336	103.40823	3801.696336	103.153417	3801.696336	112.003656	3801.696336	96.004907	3801.696336	191.684854	3801.696336	112.988719	3801.696336	81.270896	3801.696336	191.684854	3801.696336	173.797332
3803.625152	103.393428	3803.625152	103.148116	3803.625152	111.773156	3803.625152	96.177979	3803.625152	191.627653	3803.625152	113.192468	3803.625152	81.204036	3803.625152	191.627653	3803.625152	173.820139
3805.553968	103.368913	3805.553968	103.163647	3805.553968	111.69374	3805.553968	96.273339	3805.553968	191.581341	3805.553968	113.367569	3805.553968	81.174195	3805.553968	191.581341	3805.553968	173.750362
3807.482784	103.369995	3807.482784	103.229254	3807.482784	111.686201	3807.482784	96.296921	3807.482784	191.57152	3807.482784	113.547087	3807.482784	81.195555	3807.482784	191.57152	3807.482784	173.817229
3809.4116	103.392822	3809.4116	103.282231	3809.4116	111.649049	3809.4116	96.252062	3809.4116	191.637654	3809.4116	113.497116	3809.4116	81.19312	3809.4116	191.637654	3809.4116	173.957242
3811.340416	103.392334	3811.340416	103.307367	3811.340416	111.981362	3811.340416	96.104865	3811.340416	191.679835	3811.340416	113.314176	3811.340416	81.172889	3811.340416	191.679835	3811.340416	173.929093
3813.269232	103.380726	3813.269232	103.223552	3813.269232	111.994086	3813.269232	95.947667	3813.269232	191.692909	3813.269232	113.029667	3813.269232	81.09221	3813.269232	191.692909	3813.269232	173.892575
3815.198048	103.358756	3815.198048	103.125111	3815.198048	112.047481	3815.198048	95.829813	3815.198048	191.673019	3815.198048	112.783848	3815.198048	81.038062	3815.198048	191.673019	3815.198048	173.944066
3817.126864	103.321992	3817.126864	102.878696	3817.126864	112.139434	3817.126864	95.708089	3817.126864	191.582942	3817.126864	113.011441	3817.126864	80.983879	3817.126864	191.582942	3817.126864	173.820421
3819.05568	103.258396	3819.05568	102.654076	3819.05568	111.905396	3819.05568	95.678152	3819.05568	191.462266	3819.05568	113.16137	3819.05568	80.887359	3819.05568	191.462266	3819.05568	173.715882
3820.984496	103.177614	3820.984496	102.489542	3820.984496	111.526361	3820.984496	95.848342	3820.984496	191.292261	3820.984496	113.273693	3820.984496	80.807819	3820.984496	191.292261	3820.984496	173.721539
3822.913312	103.133772	3822.913312	102.342101	3822.913312	111.094446	3822.913312	95.834167	3822.913312	191.08971	3822.913312	113.155573	3822.913312	80.830992	3822.913312	191.08971	3822.913312	173.632799
3824.842128	103.133243	3824.842128	102.303827	3824.842128	110.850837	3824.842128	95.790897	3824.842128	191.114158	3824.842128	112.910732	3824.842128	80.791395	3824.842128	191.114158	3824.842128	173.616441
3826.770944	103.156989	3826.770944	102.293768	3826.770944	110.780024	3826.770944	95.736736	3826.770944	191.190291	3826.770944	112.758856	3826.770944	80.563817	3826.770944	191.190291	3826.770944	173.658461
3828.69976	103.137243	3828.69976	102.265795	3828.69976	110.974684	3828.69976	95.600672	3828.69976	191.217558	3828.69976	112.688956	3828.69976	80.209054	3828.69976	191.217558	3828.69976	173.712378
3830.628576	103.09543	3830.628576	102.316442	3830.628576	111.440315	3830.628576	95.338872	3830.628576	191.243734	3830.628576	112.45797	3830.628576	79.987671	3830.628576	191.243734	3830.628576	173.772575
3832.557392	103.079977	3832.557392	102.30502	3832.557392	111.597315	3832.557392	94.986052	3832.557392	191.170108	3832.557392	112.392573	3832.557392	79.974759	3832.557392	191.170108	3832.557392	173.684416
3834.486208	103.050996	3834.486208	102.275732	3834.486208	111.683453	3834.486208	94.898012	3834.486208	191.116089	3834.486208	112.467297	3834.486208	80.18225	3834.486208	191.116089	3834.486208	173.669203
3836.415024	103.001003	3836.415024	102.072323	3836.415024	111.54751	3836.415024	95.059947	3836.415024	191.157318	3836.415024	112.504764	3836.415024	80.339572	3836.415024	191.157318	3836.415024	173.543104
3838.34384	102.973024	3838.34384	101.837679	3838.34384	111.155395	3838.34384	95.269752	3838.34384	191.087102	3838.34384	112.735329	3838.34384	80.370331	3838.34384	191.087102	3838.34384	173.367319
3840.272656	102.957507	3840.272656	101.740912	3840.272656	110.653385	3840.272656	95.377478	3840.272656	190.998901	3840.272656	112.561976	3840.272656	80.305809	3840.272656	190.998901	3840.272656	173.597702
3842.201472	102.935004	3842.201472	101.794446	3842.201472	110.251786	3842.201472	95.378112	3842.201472	191.008735	3842.201472	112.325499	3842.201472	80.393467	3842.201472	191.008735	3842.201472	173.698873
3844.130288	102.907138	3844.130288	101.987067	3844.130288	110.339698	3844.130288	95.388518	3844.130288	191.045925	3844.130288	112.382941	3844.130288	80.310837	3844.130288	191.045925	3844.130288	173.624418
3846.059104	102.895007	3846.059104	102.020136	3846.059104	110.726517	3846.059104	95.342468	3846.059104	191.119234	3846.059104	112.19633	3846.059104	80.133442	3846.059104	191.119234	3846.059104	173.518605
3847.98792	102.89941	3847.98792	102.047067	3847.98792	111.360927	3847.98792	95.11731	3847.98792	191.07715	3847.98792	111.965897	3847.98792	80.173628	3847.98792	191.07715	3847.98792	173.435113
3849.916736	102.926748	3849.916736	102.218459	3849.916736	111.651606	3849.916736	94.960428	3849.916736	191.043402	3849.916736	111.902451	3849.916736	80.164685	3849.916736	191.043402	3849.916736	173.497421
3851.845552	102.950083	3851.845552	102.430657	3851.845552	111.654019	3851.845552	94.986031	3851.845552	191.068048	3851.845552	111.837298	3851.845552	80.202272	3851.845552	191.068048	3851.845552	173.659006
3853.774368	102.947399	3853.774368	102.363818	3853.774368	111.631891	3853.774368	94.99541	3853.774368	191.015687	3853.774368	111.813671	3853.774368	80.269608	3853.774368	191.015687	3853.774368	173.619031
3855.703184	102.93008	3855.703184	102.25564	3855.703184	111.398339	3855.703184	95.044685	3855.703184	190.934644	3855.703184	111.881348	3855.703184	80.260792	3855.703184	190.934644	3855.703184	173.514355
3857.632	102.880497	3857.632	102.172023	3857.632	110.794036	3857.632	95.109316	3857.632	190.891577	3857.632	112.038893	3857.632	80.32852	3857.632	190.891577	3857.632	173.521829
3859.560816	102.819451	3859.560816	101.943538	3859.560816	110.410659	3859.560816	95.055884	3859.560816	190.792431	3859.560816	111.853343	3859.560816	80.285165	3859.560816	190.792431	3859.560816	173.38142
3861.489632	102.781827	3861.489632	101.594275	3861.489632	110.292349	3861.489632	94.968111	3861.489632	190.733166	3861.489632	111.542566	3861.489632	80.136746	3861.489632	190.733166	3861.489632	173.277665
3863.418448	102.750218	3863.418448	101.099746	3863.418448	110.523018	3863.418448	94.859861	3863.418448	190.786665	3863.418448	111.380862	3863.418448	80.100021	3863.418448	190.786665	3863.418448	173.186638
3865.347264	102.71745	3865.347264	100.756951	3865.347264	110.719168	3865.347264	94.629899	3865.347264	190.841252	3865.347264	111.23552	3865.347264	80.074627	3865.347264	190.841252	3865.347264	173.238435
3867.27608	102.700601	3867.27608	100.895639	3867.27608	110.628837	3867.27608	94.40585	3867.27608	190.845929	3867.27608	111.280847	3867.27608	80.025232	3867.27608	190.845929	3867.27608	173.571384
3869.204896	102.717092	3869.204896	101.085321	3869.204896	110.339545	3869.204896	94.143977	3869.204896	190.781285	3869.204896	111.414988	3869.204896	80.091242	3869.204896	190.781285	3869.204896	173.551435
3871.133712	102.735706	3871.133712	101.185517	3871.133712	110.380285	3871.133712	94.020482	3871.133712	190.714505	3871.133712	111.450946	3871.133712	80.264637	3871.133712	190.714505	3871.133712	173.386308
3873.062528	102.750352	3873.062528	101.017273	3873.062528	110.322287	3873.062528	94.227915	3873.062528	190.680755	3873.062528	111.509372	3873.062528	80.388872	3873.062528	190.680755	3873.062528	173.366602
3874.991344	102.748965	3874.991344	100.932195	3874.991344	110.218878	3874.991344	94.401602	3874.991344	190.67442	3874.991344	111.62297	3874.991344	80.368727	3874.991344	190.67442	3874.991344	173.322999
3876.92016	102.711171	3876.92016	101.024531	3876.92016	110.003518	3876.92016	94.402848	3876.92016	190.665923	3876.92016	111.557931	3876.92016	80.170153	3876.92016	190.665923	3876.92016	173.343248
3878.848976	102.657683	3878.848976	101.168875	3878.848976	110.057383	3878.848976	94.281008	3878.848976	190.627979	3878.848976	111.404664	3878.848976	79.929198	3878.848976	190.627979	3878.848976	173.455625
3880.777792	102.606693	3880.777792	101.177612	3880.777792	110.274742	3880.777792	94.29537	3880.777792	190.64314	3880.777792	111.350376	3880.777792	80.070259	3880.777792	190.64314	3880.777792	173.412123
3882.706608	102.590273	3882.706608	101.277526	3882.706608	110.608894	3882.706608	94.364628	3882.706608	190.793866	3882.706608	111.25386	3882.706608	80.217002	3882.706608	190.793866	3882.706608	173.388454
3884.635424	102.641011	3884.635424	101.348262	3884.635424	110.686471	3884.635424	94.464234	3884.635424	190.815125	3884.635424	111.135434	3884.635424	80.287451	3884.635424	190.815125	3884.635424	173.424998
3886.56424	102.714395	3886.56424	101.390377	3886.56424	110.446951	3886.56424	94.521718	3886.56424	190.782196	3886.56424	111.137823	3886.56424	80.336181	3886.56424	190.782196	3886.56424	173.415813
3888.493056	102.768604	3888.493056	101.434128	3888.493056	110.433544	3888.493056	94.611568	3888.493056	190.796724	3888.493056	111.431523	3888.493056	80.413054	3888.493056	190.796724	3888.493056	173.471975
3890.421872	102.794799	3890.421872	101.555411	3890.421872	110.659314	3890.421872	94.655031	3890.421872	190.871815	3890.421872	111.867135	3890.421872	80.526911	3890.421872	190.871815	3890.421872	173.47124
3892.350688	102.847043	3892.350688	101.681491	3892.350688	110.724882	3892.350688	94.602564	3892.350688	190.962852	3892.350688	111.848226	3892.350688	80.614035	3892.350688	190.962852	3892.350688	173.501826
3894.279504	102.894473	3894.279504	101.743132	3894.279504	111.035892	3894.279504	94.557127	3894.279504	191.032907	3894.279504	111.764897	3894.279504	80.581784	3894.279504	191.032907	3894.279504	173.521903
3896.20832	102.881756	3896.20832	101.601984	3896.20832	111.110395	3896.20832	94.548606	3896.20832	191.093949	3896.20832	111.755253	3896.20832	80.670862	3896.20832	191.093949	3896.20832	173.402373
3898.137136	102.850889	3898.137136	101.50074	3898.137136	110.891106	3898.137136	94.661001	3898.137136	191.172375	3898.137136	111.834586	3898.137136	80.77219	3898.137136	191.172375	3898.137136	173.313369
3900.065952	102.851511	3900.065952	101.408904	3900.065952	110.89397	3900.065952	94.833974	3900.065952	191.244275	3900.065952	111.946791	3900.065952	80.845627	3900.065952	191.244275	3900.065952	173.280448
3901.994768	102.849123	3901.994768	101.480868	3901.994768	110.983713	3901.994768	94.843381	3901.994768	191.274303	3901.994768	111.979835	3901.994768	81.000584	3901.994768	191.274303	3901.994768	173.152624
3903.923584	102.836086	3903.923584	101.751938	3903.923584	110.78399	3903.923584	94.866429	3903.923584	191.335512	3903.923584	111.896261	3903.923584	81.084754	3903.923584	191.335512	3903.923584	173.193113
3905.8524	102.827152	3905.8524	101.984483	3905.8524	110.646939	3905.8524	94.94775	3905.8524	191.326773	3905.8524	112.079846	3905.8524	81.13209	3905.8524	191.326773	3905.8524	173.293983
3907.781216	102.832898	3907.781216	101.992287	3907.781216	110.769393	3907.781216	94.919358	3907.781216	191.33161	3907.781216	112.231748	3907.781216	81.145688	3907.781216	191.33161	3907.781216	173.247013
3909.710032	102.856186	3909.710032	102.041677	3909.710032	110.966188	3909.710032	94.987959	3909.710032	191.405837	3909.710032	112.161614	3909.710032	81.066522	3909.710032	191.405837	3909.710032	173.191746
3911.638848	102.900029	3911.638848	102.169286	3911.638848	111.203551	3911.638848	95.13664	3911.638848	191.386696	3911.638848	112.144986	3911.638848	81.100796	3911.638848	191.386696	3911.638848	173.288041
3913.567664	102.905026	3913.567664	102.200791	3913.567664	111.570002	3913.567664	95.124996	3913.567664	191.408357	3913.567664	112.050122	3913.567664	81.244398	3913.567664	191.408357	3913.567664	173.417719
3915.49648	102.883517	3915.49648	102.287243	3915.49648	111.639036	3915.49648	95.005181	3915.49648	191.470276	3915.49648	112.045711	3915.49648	81.29076	3915.49648	191.470276	3915.49648	173.482557
3917.425296	102.850555	3917.425296	102.430467	3917.425296	111.333254	3917.425296	94.941756	3917.425296	191.450644	3917.425296	112.123429	3917.425296	81.352498	3917.425296	191.450644	3917.425296	173.552885
3919.354112	102.811195	3919.354112	102.339677	3919.354112	111.124132	3919.354112	94.951858	3919.354112	191.519927	3919.354112	112.039189	3919.354112	81.488024	3919.354112	191.519927	3919.354112	173.568537
3921.282928	102.780218	3921.282928	102.01166	3921.282928	111.072616	3921.282928	94.947782	3921.282928	191.608999	3921.282928	112.001758	3921.282928	81.57962	3921.282928	191.608999	3921.282928	173.462257
3923.211744	102.758891	3923.211744	101.72816	3923.211744	111.006483	3923.211744	94.989928	3923.211744	191.550523	3923.211744	111.987617	3923.211744	81.558469	3923.211744	191.550523	3923.211744	173.340415
3925.14056	102.741172	3925.14056	101.568997	3925.14056	110.872731	3925.14056	94.910209	3925.14056	191.472007	3925.14056	111.867867	3925.14056	81.45687	3925.14056	191.472007	3925.14056	173.262454
3927.069376	102.73882	3927.069376	101.487214	3927.069376	110.77393	3927.069376	94.764961	3927.069376	191.483349	3927.069376	111.871387	3927.069376	81.320943	3927.069376	191.483349	3927.069376	173.21109
3928.998192	102.757744	3928.998192	101.622923	3928.998192	110.6494	3928.998192	94.723444	3928.998192	191.550148	3928.998192	111.864765	3928.998192	81.168973	3928.998192	191.550148	3928.998192	173.255867
3930.927008	102.790075	3930.927008	101.716526	3930.927008	110.596947	3930.927008	94.724141	3930.927008	191.597782	3930.927008	111.685148	3930.927008	81.120539	3930.927008	191.597782	3930.927008	173.347006
3932.855824	102.798464	3932.855824	101.707941	3932.855824	110.792447	3932.855824	94.707134	3932.855824	191.629875	3932.855824	111.541659	3932.855824	81.156896	3932.855824	191.629875	3932.855824	173.349279
3934.78464	102.771746	3934.78464	101.784441	3934.78464	110.839802	3934.78464	94.729292	3934.78464	191.575245	3934.78464	111.561386	3934.78464	81.215263	3934.78464	191.575245	3934.78464	173.347028
3936.713456	102.710998	3936.713456	101.834379	3936.713456	110.721269	3936.713456	94.779379	3936.713456	191.467638	3936.713456	111.674163	3936.713456	81.280142	3936.713456	191.467638	3936.713456	173.362291
3938.642272	102.655884	3938.642272	101.693464	3938.642272	110.869856	3938.642272	94.809505	3938.642272	191.41578	3938.642272	111.779986	3938.642272	81.325712	3938.642272	191.41578	3938.642272	173.383562
3940.571088	102.628122	3940.571088	101.482003	3940.571088	110.969009	3940.571088	94.859705	3940.571088	191.429091	3940.571088	111.851806	3940.571088	81.332303	3940.571088	191.429091	3940.571088	173.339885
3942.499904	102.629909	3942.499904	101.478975	3942.499904	110.845284	3942.499904	94.961441	3942.499904	191.471883	3942.499904	111.746889	3942.499904	81.345349	3942.499904	191.471883	3942.499904	173.311333
3944.42872	102.654449	3944.42872	101.531501	3944.42872	110.566226	3944.42872	94.984139	3944.42872	191.550859	3944.42872	111.575314	3944.42872	81.398597	3944.42872	191.550859	3944.42872	173.345698
3946.357536	102.691169	3946.357536	101.511085	3946.357536	110.453999	3946.357536	94.919838	3946.357536	191.639807	3946.357536	111.473831	3946.357536	81.479042	3946.357536	191.639807	3946.357536	173.367439
3948.286352	102.725107	3948.286352	101.44993	3948.286352	110.449568	3948.286352	94.981173	3948.286352	191.668308	3948.286352	111.430494	3948.286352	81.531938	3948.286352	191.668308	3948.286352	173.331978
3950.215168	102.751016	3950.215168	101.414851	3950.215168	110.530618	3950.215168	95.074526	3950.215168	191.677981	3950.215168	111.406882	3950.215168	81.559037	3950.215168	191.677981	3950.215168	173.282685
3952.143984	102.765774	3952.143984	101.425279	3952.143984	110.746054	3952.143984	95.089131	3952.143984	191.711316	3952.143984	111.465596	3952.143984	81.602359	3952.143984	191.711316	3952.143984	173.25015
3954.0728	102.771431	3954.0728	101.562735	3954.0728	110.764105	3954.0728	95.064766	3954.0728	191.748861	3954.0728	111.570822	3954.0728	81.623695	3954.0728	191.748861	3954.0728	173.249039
3956.001616	102.75212	3956.001616	101.826912	3956.001616	110.780226	3956.001616	95.102466	3956.001616	191.747156	3956.001616	111.594249	3956.001616	81.613335	3956.001616	191.747156	3956.001616	173.291182
3957.930432	102.726252	3957.930432	101.98837	3957.930432	110.940191	3957.930432	95.149695	3957.930432	191.780126	3957.930432	111.59604	3957.930432	81.603074	3957.930432	191.780126	3957.930432	173.301443
3959.859248	102.731611	3959.859248	102.155504	3959.859248	110.998303	3959.859248	95.180533	3959.859248	191.851227	3959.859248	111.624085	3959.859248	81.647476	3959.859248	191.851227	3959.859248	173.290555
3961.788064	102.737541	3961.788064	102.323755	3961.788064	111.005754	3961.788064	95.244437	3961.788064	191.904956	3961.788064	111.653161	3961.788064	81.73435	3961.788064	191.904956	3961.788064	173.326782
3963.71688	102.741123	3963.71688	102.269168	3963.71688	111.087691	3963.71688	95.268541	3963.71688	191.910492	3963.71688	111.618695	3963.71688	81.84393	3963.71688	191.910492	3963.71688	173.334857
3965.645696	102.738559	3965.645696	102.130643	3965.645696	111.213929	3965.645696	95.286088	3965.645696	191.938487	3965.645696	111.651933	3965.645696	81.928349	3965.645696	191.938487	3965.645696	173.301719
3967.574512	102.749923	3967.574512	102.097812	3967.574512	111.206614	3967.574512	95.321845	3967.574512	192.000076	3967.574512	111.744824	3967.574512	81.970996	3967.574512	192.000076	3967.574512	173.275581
3969.503328	102.774048	3969.503328	102.129211	3969.503328	111.136396	3969.503328	95.338348	3969.503328	192.065862	3969.503328	111.802382	3969.503328	82.022953	3969.503328	192.065862	3969.503328	173.271139
3971.432144	102.798944	3971.432144	102.16184	3971.432144	111.112967	3971.432144	95.370066	3971.432144	192.140054	3971.432144	111.787876	3971.432144	82.055265	3971.432144	192.140054	3971.432144	173.276892
3973.36096	102.821721	3973.36096	102.217115	3973.36096	111.032269	3973.36096	95.401802	3973.36096	192.176226	3973.36096	111.798027	3973.36096	82.044455	3973.36096	192.176226	3973.36096	173.27825
3975.289776	102.825157	3975.289776	102.301909	3975.289776	110.966743	3975.289776	95.451985	3975.289776	192.205786	3975.289776	111.84688	3975.289776	82.028414	3975.289776	192.205786	3975.289776	173.274455
3977.218592	102.830656	3977.218592	102.336584	3977.218592	111.024053	3977.218592	95.48204	3977.218592	192.254325	3977.218592	111.920421	3977.218592	82.045859	3977.218592	192.254325	3977.218592	173.264969
3979.147408	102.84462	3979.147408	102.351523	3979.147408	111.191324	3979.147408	95.494783	3979.147408	192.272728	3979.147408	112.033874	3979.147408	82.087592	3979.147408	192.272728	3979.147408	173.24911
3981.076224	102.856962	3981.076224	102.439638	3981.076224	111.389175	3981.076224	95.513229	3981.076224	192.28167	3981.076224	112.080507	3981.076224	82.131449	3981.076224	192.28167	3981.076224	173.251265
3983.00504	102.877844	3983.00504	102.507473	3983.00504	111.509427	3983.00504	95.492664	3983.00504	192.311315	3983.00504	112.116305	3983.00504	82.175249	3983.00504	192.311315	3983.00504	173.257556
3984.933856	102.914192	3984.933856	102.540966	3984.933856	111.52348	3984.933856	95.499228	3984.933856	192.359369	3984.933856	112.20475	3984.933856	82.215228	3984.933856	192.359369	3984.933856	173.256279
3986.862672	102.960929	3986.862672	102.591344	3986.862672	111.391286	3986.862672	95.568744	3986.862672	192.409271	3986.862672	112.246656	3986.862672	82.237729	3986.862672	192.409271	3986.862672	173.255811
3988.791488	103.001808	3988.791488	102.616008	3988.791488	111.288662	3988.791488	95.641526	3988.791488	192.45281	3988.791488	112.25775	3988.791488	82.259834	3988.791488	192.45281	3988.791488	173.253329
3990.720304	103.036561	3990.720304	102.592831	3990.720304	111.282302	3990.720304	95.703507	3990.720304	192.482486	3990.720304	112.288669	3990.720304	82.308709	3990.720304	192.482486	3990.720304	173.233643
3992.64912	103.065475	3992.64912	102.60163	3992.64912	111.289618	3992.64912	95.756299	3992.64912	192.493921	3992.64912	112.337508	3992.64912	82.371692	3992.64912	192.493921	3992.64912	173.210486
3994.577936	103.081386	3994.577936	102.667232	3994.577936	111.311837	3994.577936	95.785348	3994.577936	192.518862	3994.577936	112.383857	3994.577936	82.42083	3994.577936	192.518862	3994.577936	173.199979
3996.506752	103.104796	3996.506752	102.734401	3996.506752	111.387317	3996.506752	95.783828	3996.506752	192.567455	3996.506752	112.427301	3996.506752	82.454401	3996.506752	192.567455	3996.506752	173.19548
3998.435568	103.1417	3998.435568	102.817572	3998.435568	111.526906	3998.435568	95.794835	3998.435568	192.613077	3998.435568	112.459717	3998.435568	82.477154	3998.435568	192.613077	3998.435568	173.185311
4000.364384	103.180263	4000.364384	102.932092	4000.364384	111.646582	4000.364384	95.833248	4000.364384	192.650747	4000.364384	112.459761	4000.364384	82.487717	4000.364384	192.650747	4000.364384	173.176389
