# Supplementary material for: Microwave Vitrification of Uranium Tailings: Microstructure and Mechanical Property
Source: Hindawi journal article supplement (doi:10.1155/2021/5544835), 2021-04-19
Supplement: f1 [file 5544835.f1.zip › 5544835.f1/Power and Temperature.txt]

	power	temperature
1	825	303
2	201	333
3	1025	363
4	945	393
5	909	423
6	989	453
7	1183	483
8	533	513
9	490	544
10	786	574
11	479	600
12	875	620
13	437	640
14	720	660
15	462	683
16	1001	703
17	778	720
18	1105	740
19	841	760
20	425	779
21	537	800
22	531	820
23	573	840
24	692	860
25	902	880
26	914	900
27	1178	910
28	499	920
29	1203	930
30	1156	940
31	767	950
32	1119	960
33	1101	970
34	1228	980
35	1148	990
36	1264	1000
37	1250	998
38	1171	1000
39	1189	1000
40	1356	1000
41	980	1000
42	780	1000
43	1042	1000
44	1194	1000
45	1390	1000
46	560	1000
47	1070	1000
48	785	1000
49	1012	1000
50	829	1000
51	819	1000
52	1039	1000
53	1049	1000
54	1299	1000
55	1167	1000
56	939	1000
57	1163	1000
58	823	1000
59	633	1000
60	1153	1000
61	824	1000
62	960	1000
63	840	1000
64	1360	1000
65	770	1000
66	650	1000
67	1108	1000
68	703	1000
69	830	1000
70	635	1000
71	0	1000
72	0	1000
73	0	1000
74	0	1000
75	0	1000
76	0	1000
77	0	1000
78	0	1000
79	0	1000
80	0	1000
81	0	1000
82	0	1000
83	0	1000
84	0	1000
85	0	1000
86	0	1000
87	0	1000
88	0	1000
89	0	1000
90	0	1000
91	0	1000
92	0	1000
93	0	1000
94	0	1000
95	0	1000
96	0	1000
97	0	1000
98	0	1000
99	0	1000
100	0	1000
101	0	1000
102	0	1000
103	0	1000
104	0	1000
105	0	1000
106	0	1000
107	0	1000
108	0	1000
109	0	1000
110	0	1000
111	0	1000
112	0	1000
113	0	1000
114	0	1000
115	0	1000
116	0	1000
117	0	1000
118	0	1000
119	0	1000
120	0	1000
121	0	1000
122	0	1000
123	0	1000
124	0	1000
125	0	1000
126	0	1000
127	0	1000
128	0	1000
129	0	1000
130	0	1000
131	0	1000
132	0	1000
133	0	1000
134	0	1000
135	0	1000
136	0	1000
137	0	1000
138	0	1000
139	0	1000
140	0	1000
141	0	1000
142	0	1000
143	0	1000
144	0	1000
145	0	1000
146	0	1000
147	0	1000
148	0	1000
149	0	1000
150	0	1000
151	0	1000
152	0	1000
153	0	1000
154	0	1000
155	0	1000
156	0	1000
157	0	1000
158	0	1000
159	0	1000
160	0	1000
161	0	1000
162	0	1000
163	0	1000
164	0	1000
165	0	1000
166	0	1000
167	0	1000
168	0	1000
169	0	1000
170	0	1000
171	0	1000
172	0	1000
173	0	1000
174	0	1000
175	0	1000
176	0	1000
177	0	1000
178	0	1000
