# Supplementary material for: Microwave Vitrification of Uranium Tailings: Microstructure and Mechanical Property
Source: Hindawi journal article supplement (doi:10.1155/2021/5544835), 2021-04-19
Supplement: f1 [file 5544835.f1.zip › 5544835.f1/Vickers hardnessd.txt]

	1000¡æ	ear		        1100¡æ	ear	                1200¡æ	ear		        1300¡æ	ear
0	400.5	29.15444	0	480.1	25.45726 	0	574.9	22.36185	0	622.4	27.75827
5	420.8	24.61283	5	530.4	26.35741	5	635.6	27.43182	5	674.1	29.12663
10	450.2	22.76645	10	580.6	26.39554	10	688.1	28.12788	10	713.2	21.45383
15	510.3	21.45673	15	620.4	26.32141	15	737.7	28.44625	15	776.9	22.31131
20	565.5	31.94041	20	671.1	22.78795	20	781.6	21.71689	20	823.1	25.19718
