# Supplementary material for: Microwave Vitrification of Uranium Tailings: Microstructure and Mechanical Property
Source: Hindawi journal article supplement (doi:10.1155/2021/5544835), 2021-04-19
Supplement: f1 [file 5544835.f1.zip › 5544835.f1/XRD.txt]

0% 5% 10% 15% 20% 1000�� 1100�� 1200�� 1300��
10.0001	221	10.0001	230	10.0001	291	10.0001	178	10.0001	239	10.0001	229	10.0001	199	10.0001	239	10.0001	264
10.0429	237	10.0429	207	10.0429	304	10.0429	194	10.0429	243	10.0429	261	10.0429	207	10.0429	243	10.0429	249
10.0856	212	10.0856	229	10.0856	255	10.0856	233	10.0856	251	10.0856	246	10.0856	229	10.0856	251	10.0856	223
10.1284	212	10.1284	242	10.1284	248	10.1284	198	10.1284	241	10.1284	256	10.1284	198	10.1284	241	10.1284	258
10.1711	244	10.1711	232	10.1711	257	10.1711	201	10.1711	247	10.1711	234	10.1711	182	10.1711	247	10.1711	215
10.2139	214	10.2139	224	10.2139	242	10.2139	244	10.2139	250	10.2139	234	10.2139	184	10.2139	250	10.2139	249
10.2567	206	10.2567	210	10.2567	254	10.2567	191	10.2567	265	10.2567	254	10.2567	187	10.2567	265	10.2567	209
10.2994	215	10.2994	216	10.2994	256	10.2994	217	10.2994	270	10.2994	269	10.2994	214	10.2994	270	10.2994	245
10.3422	219	10.3422	230	10.3422	271	10.3422	228	10.3422	233	10.3422	256	10.3422	200	10.3422	233	10.3422	226
10.385	219	10.385	207	10.385	261	10.385	198	10.385	237	10.385	254	10.385	168	10.385	237	10.385	247
10.4277	222	10.4277	233	10.4277	253	10.4277	186	10.4277	227	10.4277	236	10.4277	180	10.4277	227	10.4277	256
10.4705	203	10.4705	204	10.4705	233	10.4705	233	10.4705	235	10.4705	248	10.4705	170	10.4705	235	10.4705	260
10.5132	202	10.5132	228	10.5132	264	10.5132	205	10.5132	228	10.5132	232	10.5132	185	10.5132	228	10.5132	229
10.556	211	10.556	211	10.556	280	10.556	195	10.556	230	10.556	250	10.556	209	10.556	230	10.556	250
10.5988	203	10.5988	238	10.5988	246	10.5988	203	10.5988	239	10.5988	247	10.5988	192	10.5988	239	10.5988	258
10.6415	218	10.6415	239	10.6415	252	10.6415	229	10.6415	241	10.6415	256	10.6415	180	10.6415	241	10.6415	233
10.6843	232	10.6843	240	10.6843	284	10.6843	213	10.6843	225	10.6843	205	10.6843	200	10.6843	225	10.6843	254
10.727	211	10.727	230	10.727	265	10.727	231	10.727	203	10.727	238	10.727	183	10.727	203	10.727	238
10.7698	208	10.7698	204	10.7698	234	10.7698	221	10.7698	249	10.7698	237	10.7698	193	10.7698	249	10.7698	264
10.8126	206	10.8126	207	10.8126	271	10.8126	223	10.8126	263	10.8126	247	10.8126	188	10.8126	263	10.8126	202
10.8553	227	10.8553	217	10.8553	255	10.8553	197	10.8553	238	10.8553	223	10.8553	191	10.8553	238	10.8553	218
10.8981	176	10.8981	217	10.8981	292	10.8981	221	10.8981	229	10.8981	234	10.8981	188	10.8981	229	10.8981	253
10.9408	217	10.9408	242	10.9408	259	10.9408	211	10.9408	235	10.9408	262	10.9408	214	10.9408	235	10.9408	237
10.9836	197	10.9836	219	10.9836	260	10.9836	201	10.9836	214	10.9836	238	10.9836	181	10.9836	214	10.9836	209
11.0264	193	11.0264	249	11.0264	251	11.0264	194	11.0264	222	11.0264	212	11.0264	183	11.0264	222	11.0264	216
11.0691	205	11.0691	204	11.0691	247	11.0691	198	11.0691	234	11.0691	225	11.0691	187	11.0691	234	11.0691	267
11.1119	184	11.1119	211	11.1119	252	11.1119	223	11.1119	226	11.1119	254	11.1119	191	11.1119	226	11.1119	242
11.1547	176	11.1547	214	11.1547	257	11.1547	187	11.1547	252	11.1547	226	11.1547	183	11.1547	252	11.1547	235
11.1974	213	11.1974	237	11.1974	288	11.1974	235	11.1974	238	11.1974	245	11.1974	222	11.1974	238	11.1974	250
11.2402	187	11.2402	229	11.2402	259	11.2402	219	11.2402	229	11.2402	233	11.2402	178	11.2402	229	11.2402	237
11.2829	197	11.2829	194	11.2829	258	11.2829	226	11.2829	242	11.2829	244	11.2829	212	11.2829	242	11.2829	226
11.3257	201	11.3257	232	11.3257	278	11.3257	208	11.3257	236	11.3257	238	11.3257	194	11.3257	236	11.3257	263
11.3685	227	11.3685	221	11.3685	259	11.3685	182	11.3685	259	11.3685	233	11.3685	187	11.3685	259	11.3685	234
11.4112	202	11.4112	223	11.4112	263	11.4112	197	11.4112	226	11.4112	279	11.4112	221	11.4112	226	11.4112	234
11.454	214	11.454	214	11.454	239	11.454	221	11.454	244	11.454	253	11.454	202	11.454	244	11.454	225
11.4967	188	11.4967	226	11.4967	265	11.4967	221	11.4967	242	11.4967	233	11.4967	170	11.4967	242	11.4967	239
11.5395	206	11.5395	224	11.5395	268	11.5395	224	11.5395	231	11.5395	246	11.5395	209	11.5395	231	11.5395	234
11.5823	194	11.5823	220	11.5823	281	11.5823	205	11.5823	242	11.5823	256	11.5823	199	11.5823	242	11.5823	216
11.625	188	11.625	258	11.625	266	11.625	211	11.625	242	11.625	259	11.625	178	11.625	242	11.625	233
11.6678	184	11.6678	211	11.6678	269	11.6678	205	11.6678	246	11.6678	210	11.6678	192	11.6678	246	11.6678	233
11.7106	196	11.7106	213	11.7106	273	11.7106	199	11.7106	223	11.7106	230	11.7106	190	11.7106	223	11.7106	266
11.7533	199	11.7533	214	11.7533	262	11.7533	197	11.7533	239	11.7533	251	11.7533	199	11.7533	239	11.7533	252
11.7961	209	11.7961	224	11.7961	248	11.7961	215	11.7961	248	11.7961	248	11.7961	216	11.7961	248	11.7961	240
11.8388	199	11.8388	227	11.8388	237	11.8388	217	11.8388	264	11.8388	239	11.8388	196	11.8388	264	11.8388	246
11.8816	197	11.8816	230	11.8816	262	11.8816	233	11.8816	251	11.8816	229	11.8816	217	11.8816	251	11.8816	239
11.9244	179	11.9244	212	11.9244	257	11.9244	202	11.9244	238	11.9244	242	11.9244	208	11.9244	238	11.9244	209
11.9671	195	11.9671	203	11.9671	276	11.9671	217	11.9671	235	11.9671	227	11.9671	203	11.9671	235	11.9671	244
12.0099	188	12.0099	207	12.0099	235	12.0099	230	12.0099	235	12.0099	246	12.0099	193	12.0099	235	12.0099	234
12.0526	209	12.0526	196	12.0526	255	12.0526	217	12.0526	234	12.0526	257	12.0526	216	12.0526	234	12.0526	256
12.0954	193	12.0954	220	12.0954	239	12.0954	202	12.0954	266	12.0954	247	12.0954	206	12.0954	266	12.0954	239
12.1382	186	12.1382	221	12.1382	250	12.1382	225	12.1382	262	12.1382	250	12.1382	217	12.1382	262	12.1382	232
12.1809	223	12.1809	192	12.1809	283	12.1809	223	12.1809	240	12.1809	238	12.1809	216	12.1809	240	12.1809	248
12.2237	214	12.2237	216	12.2237	259	12.2237	201	12.2237	272	12.2237	243	12.2237	197	12.2237	272	12.2237	259
12.2665	206	12.2665	221	12.2665	238	12.2665	226	12.2665	264	12.2665	235	12.2665	210	12.2665	264	12.2665	255
12.3092	231	12.3092	249	12.3092	268	12.3092	232	12.3092	238	12.3092	224	12.3092	192	12.3092	238	12.3092	249
12.352	187	12.352	243	12.352	264	12.352	215	12.352	246	12.352	269	12.352	203	12.352	246	12.352	233
12.3947	208	12.3947	209	12.3947	265	12.3947	216	12.3947	266	12.3947	239	12.3947	192	12.3947	266	12.3947	237
12.4375	233	12.4375	227	12.4375	267	12.4375	229	12.4375	258	12.4375	231	12.4375	190	12.4375	258	12.4375	242
12.4803	195	12.4803	185	12.4803	260	12.4803	224	12.4803	208	12.4803	257	12.4803	208	12.4803	208	12.4803	233
12.523	217	12.523	194	12.523	232	12.523	221	12.523	259	12.523	255	12.523	221	12.523	259	12.523	217
12.5658	193	12.5658	225	12.5658	268	12.5658	184	12.5658	256	12.5658	235	12.5658	206	12.5658	256	12.5658	268
12.6085	192	12.6085	235	12.6085	252	12.6085	227	12.6085	215	12.6085	242	12.6085	205	12.6085	215	12.6085	242
12.6513	207	12.6513	227	12.6513	266	12.6513	220	12.6513	252	12.6513	221	12.6513	204	12.6513	252	12.6513	227
12.6941	193	12.6941	211	12.6941	308	12.6941	239	12.6941	262	12.6941	262	12.6941	218	12.6941	262	12.6941	248
12.7368	194	12.7368	232	12.7368	273	12.7368	219	12.7368	267	12.7368	241	12.7368	179	12.7368	267	12.7368	242
12.7796	212	12.7796	227	12.7796	265	12.7796	219	12.7796	287	12.7796	254	12.7796	214	12.7796	287	12.7796	247
12.8223	213	12.8223	247	12.8223	230	12.8223	227	12.8223	267	12.8223	226	12.8223	253	12.8223	267	12.8223	252
12.8651	180	12.8651	204	12.8651	258	12.8651	201	12.8651	236	12.8651	284	12.8651	209	12.8651	236	12.8651	255
12.9079	179	12.9079	227	12.9079	269	12.9079	218	12.9079	256	12.9079	259	12.9079	186	12.9079	256	12.9079	273
12.9506	203	12.9506	218	12.9506	267	12.9506	242	12.9506	259	12.9506	234	12.9506	228	12.9506	259	12.9506	250
12.9934	180	12.9934	213	12.9934	253	12.9934	221	12.9934	242	12.9934	251	12.9934	211	12.9934	242	12.9934	251
13.0362	192	13.0362	212	13.0362	269	13.0362	244	13.0362	253	13.0362	268	13.0362	198	13.0362	253	13.0362	226
13.0789	199	13.0789	243	13.0789	282	13.0789	225	13.0789	256	13.0789	253	13.0789	198	13.0789	256	13.0789	278
13.1217	192	13.1217	223	13.1217	252	13.1217	239	13.1217	257	13.1217	238	13.1217	220	13.1217	257	13.1217	238
13.1644	180	13.1644	223	13.1644	282	13.1644	258	13.1644	233	13.1644	260	13.1644	213	13.1644	233	13.1644	233
13.2072	192	13.2072	236	13.2072	289	13.2072	250	13.2072	226	13.2072	245	13.2072	223	13.2072	226	13.2072	260
13.25	169	13.25	212	13.25	277	13.25	221	13.25	242	13.25	250	13.25	213	13.25	242	13.25	258
13.2927	202	13.2927	190	13.2927	265	13.2927	265	13.2927	262	13.2927	255	13.2927	241	13.2927	262	13.2927	227
13.3355	194	13.3355	219	13.3355	282	13.3355	247	13.3355	279	13.3355	272	13.3355	178	13.3355	279	13.3355	256
13.3782	222	13.3782	231	13.3782	257	13.3782	272	13.3782	262	13.3782	272	13.3782	226	13.3782	262	13.3782	268
13.421	198	13.421	223	13.421	261	13.421	222	13.421	280	13.421	248	13.421	235	13.421	280	13.421	248
13.4638	204	13.4638	211	13.4638	272	13.4638	251	13.4638	221	13.4638	250	13.4638	227	13.4638	221	13.4638	249
13.5065	183	13.5065	196	13.5065	266	13.5065	246	13.5065	264	13.5065	257	13.5065	208	13.5065	264	13.5065	252
13.5493	211	13.5493	227	13.5493	321	13.5493	270	13.5493	263	13.5493	235	13.5493	224	13.5493	263	13.5493	276
13.5921	215	13.5921	258	13.5921	262	13.5921	225	13.5921	271	13.5921	288	13.5921	200	13.5921	271	13.5921	259
13.6348	186	13.6348	261	13.6348	283	13.6348	219	13.6348	238	13.6348	288	13.6348	238	13.6348	238	13.6348	244
13.6776	216	13.6776	248	13.6776	281	13.6776	238	13.6776	277	13.6776	269	13.6776	225	13.6776	277	13.6776	249
13.7203	195	13.7203	232	13.7203	284	13.7203	249	13.7203	252	13.7203	246	13.7203	227	13.7203	252	13.7203	282
13.7631	212	13.7631	228	13.7631	236	13.7631	261	13.7631	255	13.7631	277	13.7631	223	13.7631	255	13.7631	270
13.8059	210	13.8059	222	13.8059	280	13.8059	234	13.8059	273	13.8059	241	13.8059	236	13.8059	273	13.8059	254
13.8486	183	13.8486	251	13.8486	276	13.8486	269	13.8486	292	13.8486	260	13.8486	216	13.8486	292	13.8486	237
13.8914	184	13.8914	240	13.8914	291	13.8914	212	13.8914	263	13.8914	307	13.8914	218	13.8914	263	13.8914	240
13.9341	212	13.9341	231	13.9341	280	13.9341	262	13.9341	293	13.9341	256	13.9341	221	13.9341	293	13.9341	279
13.9769	187	13.9769	245	13.9769	271	13.9769	245	13.9769	304	13.9769	249	13.9769	260	13.9769	304	13.9769	261
14.0197	188	14.0197	244	14.0197	302	14.0197	273	14.0197	267	14.0197	279	14.0197	223	14.0197	267	14.0197	270
14.0624	197	14.0624	241	14.0624	274	14.0624	237	14.0624	274	14.0624	295	14.0624	224	14.0624	274	14.0624	240
14.1052	197	14.1052	245	14.1052	292	14.1052	272	14.1052	264	14.1052	274	14.1052	236	14.1052	264	14.1052	286
14.148	194	14.148	223	14.148	282	14.148	258	14.148	291	14.148	268	14.148	263	14.148	291	14.148	289
14.1907	207	14.1907	232	14.1907	323	14.1907	257	14.1907	258	14.1907	270	14.1907	209	14.1907	258	14.1907	269
14.2335	193	14.2335	248	14.2335	296	14.2335	259	14.2335	261	14.2335	266	14.2335	244	14.2335	261	14.2335	257
14.2762	197	14.2762	250	14.2762	311	14.2762	265	14.2762	277	14.2762	282	14.2762	260	14.2762	277	14.2762	279
14.319	187	14.319	231	14.319	305	14.319	285	14.319	272	14.319	267	14.319	239	14.319	272	14.319	246
14.3618	207	14.3618	260	14.3618	277	14.3618	282	14.3618	274	14.3618	267	14.3618	271	14.3618	274	14.3618	255
14.4045	194	14.4045	241	14.4045	275	14.4045	241	14.4045	269	14.4045	320	14.4045	246	14.4045	269	14.4045	283
14.4473	204	14.4473	216	14.4473	311	14.4473	262	14.4473	312	14.4473	298	14.4473	253	14.4473	312	14.4473	278
14.49	178	14.49	270	14.49	336	14.49	264	14.49	287	14.49	301	14.49	243	14.49	287	14.49	261
14.5328	202	14.5328	253	14.5328	306	14.5328	248	14.5328	267	14.5328	272	14.5328	250	14.5328	267	14.5328	288
14.5756	201	14.5756	223	14.5756	286	14.5756	264	14.5756	313	14.5756	279	14.5756	240	14.5756	313	14.5756	255
14.6183	223	14.6183	232	14.6183	313	14.6183	264	14.6183	288	14.6183	322	14.6183	232	14.6183	288	14.6183	300
14.6611	200	14.6611	248	14.6611	288	14.6611	251	14.6611	276	14.6611	348	14.6611	252	14.6611	276	14.6611	255
14.7038	204	14.7038	256	14.7038	311	14.7038	245	14.7038	303	14.7038	279	14.7038	254	14.7038	303	14.7038	284
14.7466	194	14.7466	251	14.7466	295	14.7466	305	14.7466	331	14.7466	277	14.7466	248	14.7466	331	14.7466	287
14.7894	226	14.7894	267	14.7894	317	14.7894	263	14.7894	290	14.7894	282	14.7894	254	14.7894	290	14.7894	326
14.8321	185	14.8321	280	14.8321	327	14.8321	235	14.8321	285	14.8321	280	14.8321	274	14.8321	285	14.8321	258
14.8749	190	14.8749	258	14.8749	270	14.8749	262	14.8749	310	14.8749	284	14.8749	284	14.8749	310	14.8749	288
14.9177	232	14.9177	235	14.9177	285	14.9177	278	14.9177	302	14.9177	294	14.9177	225	14.9177	302	14.9177	309
14.9604	204	14.9604	249	14.9604	317	14.9604	282	14.9604	275	14.9604	280	14.9604	251	14.9604	275	14.9604	293
15.0032	205	15.0032	231	15.0032	335	15.0032	285	15.0032	315	15.0032	315	15.0032	259	15.0032	315	15.0032	275
15.0459	227	15.0459	230	15.0459	321	15.0459	291	15.0459	305	15.0459	287	15.0459	239	15.0459	305	15.0459	313
15.0887	205	15.0887	225	15.0887	367	15.0887	241	15.0887	304	15.0887	293	15.0887	251	15.0887	304	15.0887	277
15.1315	223	15.1315	275	15.1315	294	15.1315	280	15.1315	276	15.1315	293	15.1315	257	15.1315	276	15.1315	300
15.1742	217	15.1742	259	15.1742	342	15.1742	272	15.1742	326	15.1742	280	15.1742	265	15.1742	326	15.1742	297
15.217	184	15.217	262	15.217	315	15.217	273	15.217	316	15.217	288	15.217	214	15.217	316	15.217	293
15.2597	200	15.2597	272	15.2597	312	15.2597	296	15.2597	293	15.2597	314	15.2597	298	15.2597	293	15.2597	264
15.3025	212	15.3025	258	15.3025	324	15.3025	297	15.3025	317	15.3025	314	15.3025	246	15.3025	317	15.3025	321
15.3453	220	15.3453	266	15.3453	336	15.3453	283	15.3453	299	15.3453	300	15.3453	270	15.3453	299	15.3453	342
15.388	234	15.388	244	15.388	348	15.388	305	15.388	317	15.388	350	15.388	239	15.388	317	15.388	320
15.4308	230	15.4308	270	15.4308	302	15.4308	316	15.4308	308	15.4308	288	15.4308	264	15.4308	308	15.4308	313
15.4736	220	15.4736	257	15.4736	313	15.4736	295	15.4736	304	15.4736	315	15.4736	244	15.4736	304	15.4736	301
15.5163	192	15.5163	265	15.5163	349	15.5163	291	15.5163	284	15.5163	288	15.5163	257	15.5163	284	15.5163	339
15.5591	228	15.5591	249	15.5591	307	15.5591	279	15.5591	324	15.5591	312	15.5591	274	15.5591	324	15.5591	327
15.6018	228	15.6018	260	15.6018	335	15.6018	289	15.6018	297	15.6018	319	15.6018	310	15.6018	297	15.6018	293
15.6446	247	15.6446	280	15.6446	338	15.6446	305	15.6446	334	15.6446	313	15.6446	273	15.6446	334	15.6446	315
15.6874	219	15.6874	260	15.6874	349	15.6874	267	15.6874	332	15.6874	318	15.6874	283	15.6874	332	15.6874	312
15.7301	232	15.7301	267	15.7301	367	15.7301	311	15.7301	338	15.7301	312	15.7301	283	15.7301	338	15.7301	321
15.7729	218	15.7729	243	15.7729	345	15.7729	300	15.7729	332	15.7729	315	15.7729	281	15.7729	332	15.7729	340
15.8156	230	15.8156	284	15.8156	329	15.8156	314	15.8156	316	15.8156	338	15.8156	308	15.8156	316	15.8156	330
15.8584	221	15.8584	257	15.8584	330	15.8584	303	15.8584	331	15.8584	311	15.8584	313	15.8584	331	15.8584	314
15.9012	221	15.9012	273	15.9012	312	15.9012	326	15.9012	328	15.9012	326	15.9012	291	15.9012	328	15.9012	306
15.9439	212	15.9439	256	15.9439	375	15.9439	328	15.9439	355	15.9439	315	15.9439	313	15.9439	355	15.9439	352
15.9867	219	15.9867	278	15.9867	325	15.9867	315	15.9867	340	15.9867	339	15.9867	288	15.9867	340	15.9867	378
16.0295	193	16.0295	268	16.0295	322	16.0295	329	16.0295	348	16.0295	320	16.0295	309	16.0295	348	16.0295	323
16.0722	232	16.0722	261	16.0722	383	16.0722	320	16.0722	368	16.0722	318	16.0722	280	16.0722	368	16.0722	362
16.115	225	16.115	284	16.115	348	16.115	336	16.115	344	16.115	346	16.115	316	16.115	344	16.115	338
16.1577	222	16.1577	266	16.1577	389	16.1577	304	16.1577	321	16.1577	337	16.1577	320	16.1577	321	16.1577	333
16.2005	234	16.2005	303	16.2005	349	16.2005	321	16.2005	356	16.2005	367	16.2005	332	16.2005	356	16.2005	318
16.2433	253	16.2433	253	16.2433	339	16.2433	336	16.2433	367	16.2433	350	16.2433	270	16.2433	367	16.2433	344
16.286	229	16.286	268	16.286	378	16.286	322	16.286	358	16.286	330	16.286	292	16.286	358	16.286	387
16.3288	253	16.3288	287	16.3288	377	16.3288	331	16.3288	379	16.3288	336	16.3288	294	16.3288	379	16.3288	367
16.3715	261	16.3715	300	16.3715	379	16.3715	314	16.3715	364	16.3715	341	16.3715	370	16.3715	364	16.3715	343
16.4143	259	16.4143	277	16.4143	360	16.4143	346	16.4143	370	16.4143	358	16.4143	307	16.4143	370	16.4143	363
16.4571	307	16.4571	292	16.4571	383	16.4571	353	16.4571	399	16.4571	325	16.4571	305	16.4571	399	16.4571	371
16.4998	295	16.4998	277	16.4998	355	16.4998	354	16.4998	373	16.4998	361	16.4998	322	16.4998	373	16.4998	369
16.5426	268	16.5426	318	16.5426	331	16.5426	308	16.5426	337	16.5426	354	16.5426	322	16.5426	337	16.5426	346
16.5853	251	16.5853	308	16.5853	365	16.5853	349	16.5853	401	16.5853	370	16.5853	302	16.5853	401	16.5853	361
16.6281	254	16.6281	320	16.6281	402	16.6281	328	16.6281	350	16.6281	349	16.6281	296	16.6281	350	16.6281	369
16.6709	225	16.6709	311	16.6709	344	16.6709	307	16.6709	373	16.6709	369	16.6709	318	16.6709	373	16.6709	372
16.7136	240	16.7136	299	16.7136	400	16.7136	329	16.7136	384	16.7136	354	16.7136	326	16.7136	384	16.7136	379
16.7564	254	16.7564	286	16.7564	366	16.7564	355	16.7564	394	16.7564	360	16.7564	327	16.7564	394	16.7564	360
16.7992	220	16.7992	318	16.7992	386	16.7992	350	16.7992	403	16.7992	360	16.7992	308	16.7992	403	16.7992	360
16.8419	216	16.8419	289	16.8419	386	16.8419	357	16.8419	419	16.8419	351	16.8419	305	16.8419	419	16.8419	345
16.8847	244	16.8847	318	16.8847	427	16.8847	331	16.8847	371	16.8847	367	16.8847	374	16.8847	371	16.8847	384
16.9274	250	16.9274	313	16.9274	399	16.9274	373	16.9274	366	16.9274	347	16.9274	334	16.9274	366	16.9274	431
16.9702	231	16.9702	322	16.9702	378	16.9702	335	16.9702	394	16.9702	399	16.9702	337	16.9702	394	16.9702	385
17.013	213	17.013	280	17.013	393	17.013	383	17.013	385	17.013	368	17.013	306	17.013	385	17.013	375
17.0557	241	17.0557	331	17.0557	410	17.0557	341	17.0557	352	17.0557	375	17.0557	334	17.0557	352	17.0557	375
17.0985	253	17.0985	287	17.0985	388	17.0985	324	17.0985	400	17.0985	413	17.0985	345	17.0985	400	17.0985	371
17.1412	248	17.1412	339	17.1412	380	17.1412	367	17.1412	418	17.1412	380	17.1412	310	17.1412	418	17.1412	385
17.184	222	17.184	302	17.184	454	17.184	356	17.184	408	17.184	386	17.184	386	17.184	408	17.184	364
17.2268	251	17.2268	303	17.2268	392	17.2268	392	17.2268	366	17.2268	369	17.2268	345	17.2268	366	17.2268	374
17.2695	225	17.2695	307	17.2695	424	17.2695	407	17.2695	399	17.2695	399	17.2695	393	17.2695	399	17.2695	371
17.3123	252	17.3123	327	17.3123	404	17.3123	353	17.3123	448	17.3123	403	17.3123	356	17.3123	448	17.3123	386
17.3551	259	17.3551	340	17.3551	459	17.3551	392	17.3551	396	17.3551	383	17.3551	329	17.3551	396	17.3551	433
17.3978	216	17.3978	265	17.3978	408	17.3978	361	17.3978	432	17.3978	416	17.3978	338	17.3978	432	17.3978	410
17.4406	233	17.4406	355	17.4406	405	17.4406	390	17.4406	418	17.4406	383	17.4406	356	17.4406	418	17.4406	430
17.4833	260	17.4833	313	17.4833	426	17.4833	378	17.4833	410	17.4833	390	17.4833	341	17.4833	410	17.4833	419
17.5261	239	17.5261	313	17.5261	422	17.5261	392	17.5261	429	17.5261	402	17.5261	346	17.5261	429	17.5261	453
17.5689	238	17.5689	325	17.5689	421	17.5689	384	17.5689	432	17.5689	407	17.5689	374	17.5689	432	17.5689	447
17.6116	262	17.6116	353	17.6116	432	17.6116	383	17.6116	421	17.6116	429	17.6116	372	17.6116	421	17.6116	403
17.6544	269	17.6544	354	17.6544	412	17.6544	408	17.6544	461	17.6544	413	17.6544	412	17.6544	461	17.6544	433
17.6971	266	17.6971	337	17.6971	444	17.6971	389	17.6971	434	17.6971	407	17.6971	376	17.6971	434	17.6971	434
17.7399	279	17.7399	323	17.7399	465	17.7399	478	17.7399	418	17.7399	425	17.7399	364	17.7399	418	17.7399	438
17.7827	299	17.7827	334	17.7827	450	17.7827	386	17.7827	410	17.7827	406	17.7827	378	17.7827	410	17.7827	417
17.8254	272	17.8254	376	17.8254	418	17.8254	394	17.8254	447	17.8254	413	17.8254	390	17.8254	447	17.8254	448
17.8682	289	17.8682	341	17.8682	428	17.8682	441	17.8682	473	17.8682	465	17.8682	371	17.8682	473	17.8682	415
17.9109	264	17.9109	364	17.9109	475	17.9109	422	17.9109	492	17.9109	411	17.9109	382	17.9109	492	17.9109	427
17.9537	266	17.9537	348	17.9537	456	17.9537	403	17.9537	455	17.9537	473	17.9537	373	17.9537	455	17.9537	449
17.9965	279	17.9965	351	17.9965	450	17.9965	417	17.9965	443	17.9965	451	17.9965	398	17.9965	443	17.9965	404
18.0392	258	18.0392	405	18.0392	474	18.0392	416	18.0392	434	18.0392	461	18.0392	393	18.0392	434	18.0392	484
18.082	279	18.082	376	18.082	430	18.082	426	18.082	424	18.082	415	18.082	360	18.082	424	18.082	463
18.1248	276	18.1248	367	18.1248	496	18.1248	455	18.1248	462	18.1248	440	18.1248	414	18.1248	462	18.1248	424
18.1675	256	18.1675	400	18.1675	487	18.1675	445	18.1675	441	18.1675	454	18.1675	409	18.1675	441	18.1675	457
18.2103	296	18.2103	357	18.2103	472	18.2103	468	18.2103	490	18.2103	424	18.2103	387	18.2103	490	18.2103	433
18.253	274	18.253	391	18.253	492	18.253	454	18.253	492	18.253	432	18.253	436	18.253	492	18.253	464
18.2958	302	18.2958	374	18.2958	479	18.2958	466	18.2958	471	18.2958	469	18.2958	394	18.2958	471	18.2958	454
18.3386	281	18.3386	374	18.3386	465	18.3386	454	18.3386	467	18.3386	427	18.3386	422	18.3386	467	18.3386	493
18.3813	280	18.3813	364	18.3813	489	18.3813	506	18.3813	448	18.3813	472	18.3813	405	18.3813	448	18.3813	496
18.4241	289	18.4241	386	18.4241	462	18.4241	397	18.4241	458	18.4241	417	18.4241	390	18.4241	458	18.4241	478
18.4668	244	18.4668	356	18.4668	438	18.4668	498	18.4668	496	18.4668	454	18.4668	409	18.4668	496	18.4668	483
18.5096	264	18.5096	373	18.5096	467	18.5096	495	18.5096	505	18.5096	469	18.5096	407	18.5096	505	18.5096	499
18.5524	286	18.5524	395	18.5524	461	18.5524	477	18.5524	489	18.5524	445	18.5524	475	18.5524	489	18.5524	478
18.5951	272	18.5951	393	18.5951	497	18.5951	458	18.5951	483	18.5951	489	18.5951	426	18.5951	483	18.5951	476
18.6379	289	18.6379	442	18.6379	527	18.6379	467	18.6379	438	18.6379	479	18.6379	458	18.6379	438	18.6379	474
18.6807	301	18.6807	395	18.6807	497	18.6807	488	18.6807	507	18.6807	433	18.6807	448	18.6807	507	18.6807	524
18.7234	293	18.7234	426	18.7234	526	18.7234	506	18.7234	501	18.7234	472	18.7234	389	18.7234	501	18.7234	511
18.7662	274	18.7662	385	18.7662	500	18.7662	463	18.7662	500	18.7662	466	18.7662	419	18.7662	500	18.7662	475
18.8089	320	18.8089	435	18.8089	518	18.8089	475	18.8089	525	18.8089	446	18.8089	471	18.8089	525	18.8089	528
18.8517	368	18.8517	434	18.8517	567	18.8517	517	18.8517	504	18.8517	509	18.8517	436	18.8517	504	18.8517	483
18.8945	377	18.8945	398	18.8945	521	18.8945	506	18.8945	507	18.8945	440	18.8945	462	18.8945	507	18.8945	523
18.9372	318	18.9372	421	18.9372	560	18.9372	511	18.9372	535	18.9372	504	18.9372	448	18.9372	535	18.9372	497
18.98	355	18.98	370	18.98	549	18.98	485	18.98	512	18.98	484	18.98	435	18.98	512	18.98	500
19.0227	344	19.0227	436	19.0227	539	19.0227	491	19.0227	486	19.0227	477	19.0227	438	19.0227	486	19.0227	485
19.0655	332	19.0655	461	19.0655	534	19.0655	526	19.0655	522	19.0655	481	19.0655	488	19.0655	522	19.0655	546
19.1083	325	19.1083	423	19.1083	565	19.1083	500	19.1083	488	19.1083	525	19.1083	458	19.1083	488	19.1083	519
19.151	333	19.151	415	19.151	535	19.151	501	19.151	535	19.151	532	19.151	481	19.151	535	19.151	520
19.1938	321	19.1938	432	19.1938	566	19.1938	527	19.1938	544	19.1938	527	19.1938	441	19.1938	544	19.1938	511
19.2366	295	19.2366	426	19.2366	610	19.2366	528	19.2366	514	19.2366	504	19.2366	492	19.2366	514	19.2366	512
19.2793	295	19.2793	418	19.2793	614	19.2793	503	19.2793	533	19.2793	506	19.2793	468	19.2793	533	19.2793	534
19.3221	334	19.3221	415	19.3221	613	19.3221	513	19.3221	546	19.3221	550	19.3221	494	19.3221	546	19.3221	522
19.3648	344	19.3648	410	19.3648	533	19.3648	529	19.3648	550	19.3648	518	19.3648	473	19.3648	550	19.3648	519
19.4076	309	19.4076	445	19.4076	551	19.4076	529	19.4076	561	19.4076	543	19.4076	436	19.4076	561	19.4076	507
19.4504	322	19.4504	443	19.4504	573	19.4504	523	19.4504	566	19.4504	529	19.4504	453	19.4504	566	19.4504	510
19.4931	305	19.4931	450	19.4931	555	19.4931	517	19.4931	580	19.4931	562	19.4931	489	19.4931	580	19.4931	539
19.5359	323	19.5359	459	19.5359	555	19.5359	525	19.5359	527	19.5359	537	19.5359	504	19.5359	527	19.5359	548
19.5786	331	19.5786	435	19.5786	604	19.5786	528	19.5786	566	19.5786	533	19.5786	510	19.5786	566	19.5786	553
19.6214	353	19.6214	476	19.6214	612	19.6214	480	19.6214	559	19.6214	539	19.6214	530	19.6214	559	19.6214	562
19.6642	338	19.6642	458	19.6642	550	19.6642	570	19.6642	597	19.6642	592	19.6642	498	19.6642	597	19.6642	559
19.7069	318	19.7069	483	19.7069	555	19.7069	532	19.7069	578	19.7069	548	19.7069	510	19.7069	578	19.7069	546
19.7497	335	19.7497	450	19.7497	591	19.7497	555	19.7497	577	19.7497	529	19.7497	472	19.7497	577	19.7497	570
19.7924	336	19.7924	493	19.7924	621	19.7924	570	19.7924	601	19.7924	525	19.7924	530	19.7924	601	19.7924	576
19.8352	306	19.8352	468	19.8352	589	19.8352	592	19.8352	586	19.8352	574	19.8352	498	19.8352	586	19.8352	529
19.878	347	19.878	456	19.878	572	19.878	562	19.878	595	19.878	534	19.878	495	19.878	595	19.878	519
19.9207	326	19.9207	460	19.9207	553	19.9207	557	19.9207	605	19.9207	515	19.9207	511	19.9207	605	19.9207	559
19.9635	341	19.9635	472	19.9635	626	19.9635	575	19.9635	604	19.9635	550	19.9635	525	19.9635	604	19.9635	567
20.0063	364	20.0063	497	20.0063	652	20.0063	572	20.0063	550	20.0063	515	20.0063	500	20.0063	550	20.0063	589
20.049	348	20.049	475	20.049	654	20.049	586	20.049	571	20.049	555	20.049	492	20.049	571	20.049	577
20.0918	400	20.0918	482	20.0918	621	20.0918	603	20.0918	633	20.0918	556	20.0918	505	20.0918	633	20.0918	618
20.1345	355	20.1345	505	20.1345	631	20.1345	608	20.1345	596	20.1345	567	20.1345	513	20.1345	596	20.1345	621
20.1773	364	20.1773	490	20.1773	625	20.1773	615	20.1773	644	20.1773	580	20.1773	514	20.1773	644	20.1773	579
20.2201	358	20.2201	516	20.2201	640	20.2201	584	20.2201	590	20.2201	611	20.2201	503	20.2201	590	20.2201	588
20.2628	367	20.2628	484	20.2628	663	20.2628	592	20.2628	628	20.2628	592	20.2628	527	20.2628	628	20.2628	626
20.3056	380	20.3056	512	20.3056	650	20.3056	615	20.3056	610	20.3056	577	20.3056	533	20.3056	610	20.3056	597
20.3483	370	20.3483	534	20.3483	673	20.3483	638	20.3483	620	20.3483	617	20.3483	529	20.3483	620	20.3483	619
20.3911	389	20.3911	501	20.3911	630	20.3911	589	20.3911	648	20.3911	576	20.3911	511	20.3911	648	20.3911	597
20.4339	373	20.4339	516	20.4339	678	20.4339	594	20.4339	631	20.4339	610	20.4339	572	20.4339	631	20.4339	645
20.4766	407	20.4766	535	20.4766	661	20.4766	640	20.4766	638	20.4766	571	20.4766	542	20.4766	638	20.4766	603
20.5194	372	20.5194	518	20.5194	664	20.5194	590	20.5194	636	20.5194	613	20.5194	574	20.5194	636	20.5194	622
20.5622	418	20.5622	474	20.5622	707	20.5622	653	20.5622	617	20.5622	608	20.5622	517	20.5622	617	20.5622	635
20.6049	388	20.6049	566	20.6049	693	20.6049	620	20.6049	626	20.6049	611	20.6049	543	20.6049	626	20.6049	602
20.6477	447	20.6477	571	20.6477	676	20.6477	658	20.6477	690	20.6477	587	20.6477	557	20.6477	690	20.6477	639
20.6904	589	20.6904	625	20.6904	681	20.6904	657	20.6904	635	20.6904	656	20.6904	578	20.6904	635	20.6904	615
20.7332	770	20.7332	641	20.7332	708	20.7332	582	20.7332	591	20.7332	601	20.7332	572	20.7332	591	20.7332	626
20.776	1305	20.776	858	20.776	789	20.776	645	20.776	669	20.776	634	20.776	600	20.776	669	20.776	656
20.8187	2258	20.8187	1218	20.8187	897	20.8187	618	20.8187	656	20.8187	669	20.8187	593	20.8187	656	20.8187	655
20.8615	3570	20.8615	2054	20.8615	1023	20.8615	701	20.8615	593	20.8615	647	20.8615	585	20.8615	593	20.8615	630
20.9042	3773	20.9042	2938	20.9042	1009	20.9042	682	20.9042	620	20.9042	768	20.9042	611	20.9042	620	20.9042	654
20.947	2389	20.947	2970	20.947	830	20.947	678	20.947	621	20.947	720	20.947	633	20.947	621	20.947	652
20.9898	1101	20.9898	1861	20.9898	752	20.9898	745	20.9898	612	20.9898	618	20.9898	642	20.9898	612	20.9898	659
21.0325	567	21.0325	1024	21.0325	643	21.0325	672	21.0325	642	21.0325	593	21.0325	595	21.0325	642	21.0325	679
21.0753	462	21.0753	609	21.0753	742	21.0753	649	21.0753	653	21.0753	613	21.0753	645	21.0753	653	21.0753	629
21.1181	447	21.1181	601	21.1181	739	21.1181	650	21.1181	661	21.1181	606	21.1181	583	21.1181	661	21.1181	663
21.1608	434	21.1608	590	21.1608	718	21.1608	682	21.1608	676	21.1608	631	21.1608	611	21.1608	676	21.1608	649
21.2036	397	21.2036	569	21.2036	773	21.2036	696	21.2036	650	21.2036	611	21.2036	616	21.2036	650	21.2036	635
21.2463	401	21.2463	579	21.2463	744	21.2463	648	21.2463	663	21.2463	687	21.2463	608	21.2463	663	21.2463	685
21.2891	416	21.2891	554	21.2891	715	21.2891	643	21.2891	661	21.2891	636	21.2891	619	21.2891	661	21.2891	734
21.3319	424	21.3319	553	21.3319	725	21.3319	664	21.3319	700	21.3319	623	21.3319	611	21.3319	700	21.3319	753
21.3746	414	21.3746	557	21.3746	748	21.3746	680	21.3746	668	21.3746	611	21.3746	641	21.3746	668	21.3746	728
21.4174	422	21.4174	543	21.4174	744	21.4174	704	21.4174	656	21.4174	653	21.4174	603	21.4174	656	21.4174	706
21.4601	422	21.4601	539	21.4601	772	21.4601	654	21.4601	715	21.4601	670	21.4601	647	21.4601	715	21.4601	638
21.5029	424	21.5029	601	21.5029	770	21.5029	692	21.5029	686	21.5029	658	21.5029	607	21.5029	686	21.5029	659
21.5457	428	21.5457	580	21.5457	734	21.5457	656	21.5457	673	21.5457	653	21.5457	581	21.5457	673	21.5457	677
21.5884	394	21.5884	578	21.5884	775	21.5884	679	21.5884	702	21.5884	671	21.5884	583	21.5884	702	21.5884	712
21.6312	383	21.6312	558	21.6312	863	21.6312	710	21.6312	748	21.6312	676	21.6312	628	21.6312	748	21.6312	640
21.6739	408	21.6739	624	21.6739	892	21.6739	701	21.6739	756	21.6739	701	21.6739	607	21.6739	756	21.6739	669
21.7167	414	21.7167	672	21.7167	994	21.7167	779	21.7167	701	21.7167	641	21.7167	641	21.7167	701	21.7167	658
21.7595	410	21.7595	705	21.7595	1080	21.7595	705	21.7595	722	21.7595	695	21.7595	584	21.7595	722	21.7595	671
21.8022	473	21.8022	783	21.8022	1282	21.8022	766	21.8022	717	21.8022	675	21.8022	568	21.8022	717	21.8022	739
21.845	441	21.845	860	21.845	1468	21.845	725	21.845	721	21.845	694	21.845	639	21.845	721	21.845	661
21.8878	453	21.8878	975	21.8878	1567	21.8878	860	21.8878	696	21.8878	708	21.8878	655	21.8878	696	21.8878	722
21.9305	458	21.9305	1078	21.9305	1791	21.9305	851	21.9305	719	21.9305	761	21.9305	693	21.9305	719	21.9305	696
21.9733	448	21.9733	1083	21.9733	1802	21.9733	854	21.9733	770	21.9733	719	21.9733	686	21.9733	770	21.9733	642
22.016	497	22.016	1093	22.016	1532	22.016	866	22.016	712	22.016	729	22.016	677	22.016	712	22.016	678
22.0588	539	22.0588	988	22.0588	1253	22.0588	912	22.0588	721	22.0588	733	22.0588	679	22.0588	721	22.0588	737
22.1016	473	22.1016	822	22.1016	1079	22.1016	888	22.1016	748	22.1016	710	22.1016	707	22.1016	748	22.1016	716
22.1443	436	22.1443	709	22.1443	912	22.1443	779	22.1443	748	22.1443	686	22.1443	643	22.1443	748	22.1443	696
22.1871	434	22.1871	609	22.1871	865	22.1871	792	22.1871	652	22.1871	686	22.1871	638	22.1871	652	22.1871	712
22.2298	423	22.2298	643	22.2298	854	22.2298	732	22.2298	715	22.2298	713	22.2298	650	22.2298	715	22.2298	774
22.2726	422	22.2726	606	22.2726	777	22.2726	707	22.2726	674	22.2726	673	22.2726	653	22.2726	674	22.2726	706
22.3154	410	22.3154	592	22.3154	760	22.3154	740	22.3154	680	22.3154	703	22.3154	640	22.3154	680	22.3154	673
22.3581	448	22.3581	582	22.3581	780	22.3581	720	22.3581	676	22.3581	658	22.3581	654	22.3581	676	22.3581	684
22.4009	390	22.4009	620	22.4009	798	22.4009	736	22.4009	731	22.4009	688	22.4009	700	22.4009	731	22.4009	694
22.4437	406	22.4437	619	22.4437	799	22.4437	688	22.4437	709	22.4437	650	22.4437	614	22.4437	709	22.4437	719
22.4864	432	22.4864	542	22.4864	749	22.4864	729	22.4864	696	22.4864	713	22.4864	596	22.4864	696	22.4864	696
22.5292	410	22.5292	584	22.5292	774	22.5292	717	22.5292	756	22.5292	698	22.5292	689	22.5292	756	22.5292	657
22.5719	425	22.5719	637	22.5719	792	22.5719	760	22.5719	756	22.5719	707	22.5719	629	22.5719	756	22.5719	699
22.6147	423	22.6147	561	22.6147	795	22.6147	766	22.6147	719	22.6147	732	22.6147	674	22.6147	719	22.6147	686
22.6575	379	22.6575	539	22.6575	759	22.6575	809	22.6575	718	22.6575	720	22.6575	647	22.6575	718	22.6575	714
22.7002	417	22.7002	598	22.7002	833	22.7002	773	22.7002	755	22.7002	722	22.7002	650	22.7002	755	22.7002	702
22.743	425	22.743	597	22.743	803	22.743	758	22.743	765	22.743	692	22.743	637	22.743	765	22.743	681
22.7857	423	22.7857	559	22.7857	772	22.7857	760	22.7857	770	22.7857	750	22.7857	650	22.7857	770	22.7857	724
22.8285	430	22.8285	601	22.8285	755	22.8285	696	22.8285	723	22.8285	684	22.8285	714	22.8285	723	22.8285	795
22.8713	407	22.8713	577	22.8713	777	22.8713	754	22.8713	762	22.8713	682	22.8713	639	22.8713	762	22.8713	741
22.914	421	22.914	596	22.914	735	22.914	720	22.914	731	22.914	715	22.914	641	22.914	731	22.914	725
22.9568	423	22.9568	598	22.9568	796	22.9568	691	22.9568	749	22.9568	684	22.9568	676	22.9568	749	22.9568	739
22.9996	410	22.9996	587	22.9996	758	22.9996	723	22.9996	737	22.9996	701	22.9996	670	22.9996	737	22.9996	718
23.0423	422	23.0423	570	23.0423	776	23.0423	738	23.0423	747	23.0423	696	23.0423	645	23.0423	747	23.0423	711
23.0851	402	23.0851	603	23.0851	732	23.0851	662	23.0851	709	23.0851	729	23.0851	682	23.0851	709	23.0851	716
23.1278	408	23.1278	614	23.1278	745	23.1278	721	23.1278	748	23.1278	701	23.1278	660	23.1278	748	23.1278	720
23.1706	391	23.1706	589	23.1706	748	23.1706	743	23.1706	686	23.1706	730	23.1706	651	23.1706	686	23.1706	699
23.2134	400	23.2134	588	23.2134	761	23.2134	738	23.2134	808	23.2134	783	23.2134	652	23.2134	808	23.2134	775
23.2561	401	23.2561	611	23.2561	725	23.2561	685	23.2561	751	23.2561	740	23.2561	679	23.2561	751	23.2561	822
23.2989	410	23.2989	627	23.2989	820	23.2989	708	23.2989	775	23.2989	732	23.2989	675	23.2989	775	23.2989	809
23.3416	409	23.3416	609	23.3416	785	23.3416	740	23.3416	728	23.3416	736	23.3416	648	23.3416	728	23.3416	761
23.3844	437	23.3844	579	23.3844	775	23.3844	714	23.3844	735	23.3844	702	23.3844	666	23.3844	735	23.3844	746
23.4272	384	23.4272	585	23.4272	744	23.4272	729	23.4272	748	23.4272	689	23.4272	618	23.4272	748	23.4272	770
23.4699	434	23.4699	637	23.4699	770	23.4699	745	23.4699	748	23.4699	707	23.4699	627	23.4699	748	23.4699	720
23.5127	415	23.5127	571	23.5127	744	23.5127	755	23.5127	742	23.5127	693	23.5127	677	23.5127	742	23.5127	715
23.5554	431	23.5554	572	23.5554	704	23.5554	728	23.5554	752	23.5554	690	23.5554	640	23.5554	752	23.5554	727
23.5982	461	23.5982	582	23.5982	736	23.5982	724	23.5982	710	23.5982	730	23.5982	652	23.5982	710	23.5982	698
23.641	490	23.641	591	23.641	781	23.641	777	23.641	689	23.641	665	23.641	657	23.641	689	23.641	763
23.6837	413	23.6837	609	23.6837	743	23.6837	769	23.6837	750	23.6837	673	23.6837	612	23.6837	750	23.6837	719
23.7265	437	23.7265	638	23.7265	775	23.7265	755	23.7265	695	23.7265	703	23.7265	669	23.7265	695	23.7265	705
23.7693	415	23.7693	600	23.7693	755	23.7693	683	23.7693	780	23.7693	702	23.7693	668	23.7693	780	23.7693	737
23.812	436	23.812	593	23.812	741	23.812	732	23.812	738	23.812	657	23.812	658	23.812	738	23.812	717
23.8548	424	23.8548	599	23.8548	737	23.8548	737	23.8548	704	23.8548	737	23.8548	692	23.8548	704	23.8548	756
23.8975	401	23.8975	597	23.8975	780	23.8975	755	23.8975	737	23.8975	716	23.8975	669	23.8975	737	23.8975	761
23.9403	418	23.9403	547	23.9403	761	23.9403	694	23.9403	763	23.9403	703	23.9403	635	23.9403	763	23.9403	709
23.9831	436	23.9831	586	23.9831	720	23.9831	711	23.9831	739	23.9831	726	23.9831	655	23.9831	739	23.9831	723
24.0258	482	24.0258	589	24.0258	759	24.0258	708	24.0258	801	24.0258	700	24.0258	666	24.0258	801	24.0258	715
24.0686	421	24.0686	572	24.0686	721	24.0686	734	24.0686	712	24.0686	653	24.0686	642	24.0686	712	24.0686	715
24.1113	421	24.1113	583	24.1113	744	24.1113	710	24.1113	733	24.1113	659	24.1113	639	24.1113	733	24.1113	738
24.1541	406	24.1541	666	24.1541	756	24.1541	751	24.1541	720	24.1541	710	24.1541	629	24.1541	720	24.1541	779
24.1969	474	24.1969	618	24.1969	778	24.1969	759	24.1969	737	24.1969	686	24.1969	654	24.1969	737	24.1969	757
24.2396	468	24.2396	635	24.2396	705	24.2396	690	24.2396	738	24.2396	716	24.2396	639	24.2396	738	24.2396	667
24.2824	530	24.2824	674	24.2824	749	24.2824	770	24.2824	734	24.2824	670	24.2824	676	24.2824	734	24.2824	731
24.3252	557	24.3252	597	24.3252	735	24.3252	732	24.3252	748	24.3252	711	24.3252	646	24.3252	748	24.3252	749
24.3679	499	24.3679	567	24.3679	787	24.3679	668	24.3679	751	24.3679	699	24.3679	666	24.3679	751	24.3679	700
24.4107	470	24.4107	593	24.4107	744	24.4107	691	24.4107	741	24.4107	710	24.4107	644	24.4107	741	24.4107	730
24.4534	446	24.4534	562	24.4534	755	24.4534	729	24.4534	750	24.4534	640	24.4534	633	24.4534	750	24.4534	726
24.4962	449	24.4962	572	24.4962	728	24.4962	749	24.4962	709	24.4962	653	24.4962	645	24.4962	709	24.4962	727
24.539	422	24.539	590	24.539	710	24.539	731	24.539	718	24.539	703	24.539	682	24.539	718	24.539	763
24.5817	434	24.5817	573	24.5817	752	24.5817	693	24.5817	745	24.5817	714	24.5817	659	24.5817	745	24.5817	751
24.6245	398	24.6245	579	24.6245	732	24.6245	763	24.6245	719	24.6245	682	24.6245	618	24.6245	719	24.6245	743
24.6672	412	24.6672	602	24.6672	730	24.6672	715	24.6672	755	24.6672	684	24.6672	680	24.6672	755	24.6672	767
24.71	401	24.71	543	24.71	745	24.71	707	24.71	753	24.71	694	24.71	681	24.71	753	24.71	704
24.7528	391	24.7528	544	24.7528	702	24.7528	703	24.7528	755	24.7528	674	24.7528	649	24.7528	755	24.7528	701
24.7955	405	24.7955	567	24.7955	684	24.7955	691	24.7955	742	24.7955	704	24.7955	671	24.7955	742	24.7955	730
24.8383	371	24.8383	553	24.8383	719	24.8383	673	24.8383	704	24.8383	688	24.8383	666	24.8383	704	24.8383	707
24.881	428	24.881	576	24.881	713	24.881	705	24.881	723	24.881	690	24.881	651	24.881	723	24.881	726
24.9238	370	24.9238	586	24.9238	693	24.9238	647	24.9238	741	24.9238	680	24.9238	635	24.9238	741	24.9238	690
24.9666	397	24.9666	540	24.9666	686	24.9666	693	24.9666	732	24.9666	699	24.9666	655	24.9666	732	24.9666	686
25.0093	407	25.0093	568	25.0093	686	25.0093	700	25.0093	707	25.0093	640	25.0093	674	25.0093	707	25.0093	720
25.0521	407	25.0521	562	25.0521	692	25.0521	720	25.0521	682	25.0521	721	25.0521	689	25.0521	682	25.0521	764
25.0949	367	25.0949	551	25.0949	711	25.0949	688	25.0949	744	25.0949	708	25.0949	654	25.0949	744	25.0949	727
25.1376	389	25.1376	561	25.1376	710	25.1376	695	25.1376	719	25.1376	666	25.1376	656	25.1376	719	25.1376	744
25.1804	394	25.1804	508	25.1804	743	25.1804	628	25.1804	698	25.1804	698	25.1804	667	25.1804	698	25.1804	695
25.2231	402	25.2231	496	25.2231	687	25.2231	711	25.2231	725	25.2231	701	25.2231	642	25.2231	725	25.2231	685
25.2659	397	25.2659	533	25.2659	676	25.2659	699	25.2659	755	25.2659	643	25.2659	674	25.2659	755	25.2659	778
25.3087	371	25.3087	537	25.3087	682	25.3087	666	25.3087	737	25.3087	726	25.3087	652	25.3087	737	25.3087	715
25.3514	383	25.3514	591	25.3514	674	25.3514	693	25.3514	751	25.3514	681	25.3514	648	25.3514	751	25.3514	714
25.3942	411	25.3942	557	25.3942	679	25.3942	684	25.3942	724	25.3942	675	25.3942	635	25.3942	724	25.3942	713
25.4369	425	25.4369	503	25.4369	696	25.4369	690	25.4369	734	25.4369	671	25.4369	621	25.4369	734	25.4369	713
25.4797	406	25.4797	509	25.4797	698	25.4797	651	25.4797	703	25.4797	730	25.4797	656	25.4797	703	25.4797	680
25.5225	369	25.5225	576	25.5225	649	25.5225	653	25.5225	684	25.5225	672	25.5225	636	25.5225	684	25.5225	666
25.5652	401	25.5652	521	25.5652	692	25.5652	652	25.5652	726	25.5652	670	25.5652	607	25.5652	726	25.5652	739
25.608	396	25.608	576	25.608	685	25.608	651	25.608	747	25.608	684	25.608	610	25.608	747	25.608	742
25.6508	378	25.6508	620	25.6508	678	25.6508	662	25.6508	733	25.6508	631	25.6508	589	25.6508	733	25.6508	728
25.6935	432	25.6935	577	25.6935	631	25.6935	596	25.6935	673	25.6935	638	25.6935	630	25.6935	673	25.6935	693
25.7363	455	25.7363	553	25.7363	673	25.7363	664	25.7363	721	25.7363	654	25.7363	646	25.7363	721	25.7363	688
25.779	510	25.779	576	25.779	672	25.779	661	25.779	682	25.779	616	25.779	637	25.779	682	25.779	673
25.8218	473	25.8218	564	25.8218	654	25.8218	634	25.8218	739	25.8218	633	25.8218	665	25.8218	739	25.8218	717
25.8646	455	25.8646	595	25.8646	649	25.8646	657	25.8646	707	25.8646	664	25.8646	615	25.8646	707	25.8646	745
25.9073	460	25.9073	614	25.9073	658	25.9073	663	25.9073	736	25.9073	694	25.9073	591	25.9073	736	25.9073	692
25.9501	464	25.9501	564	25.9501	688	25.9501	638	25.9501	626	25.9501	620	25.9501	652	25.9501	626	25.9501	691
25.9928	500	25.9928	576	25.9928	646	25.9928	635	25.9928	677	25.9928	671	25.9928	614	25.9928	677	25.9928	721
26.0356	521	26.0356	602	26.0356	742	26.0356	681	26.0356	729	26.0356	675	26.0356	624	26.0356	729	26.0356	685
26.0784	502	26.0784	555	26.0784	689	26.0784	628	26.0784	715	26.0784	677	26.0784	670	26.0784	715	26.0784	703
26.1211	479	26.1211	583	26.1211	604	26.1211	673	26.1211	682	26.1211	665	26.1211	655	26.1211	682	26.1211	699
26.1639	486	26.1639	579	26.1639	632	26.1639	667	26.1639	693	26.1639	636	26.1639	622	26.1639	693	26.1639	679
26.2067	522	26.2067	581	26.2067	680	26.2067	657	26.2067	693	26.2067	670	26.2067	650	26.2067	693	26.2067	630
26.2494	570	26.2494	557	26.2494	657	26.2494	593	26.2494	691	26.2494	644	26.2494	665	26.2494	691	26.2494	701
26.2922	562	26.2922	598	26.2922	661	26.2922	667	26.2922	668	26.2922	676	26.2922	661	26.2922	668	26.2922	655
26.3349	638	26.3349	544	26.3349	629	26.3349	592	26.3349	685	26.3349	669	26.3349	589	26.3349	685	26.3349	661
26.3777	701	26.3777	641	26.3777	671	26.3777	627	26.3777	687	26.3777	680	26.3777	624	26.3777	687	26.3777	703
26.4205	930	26.4205	633	26.4205	666	26.4205	653	26.4205	719	26.4205	707	26.4205	594	26.4205	719	26.4205	646
26.4632	1274	26.4632	843	26.4632	688	26.4632	622	26.4632	621	26.4632	629	26.4632	601	26.4632	621	26.4632	623
26.506	2220	26.506	954	26.506	759	26.506	666	26.506	732	26.506	654	26.506	616	26.506	732	26.506	687
26.5487	4217	26.5487	1684	26.5487	948	26.5487	620	26.5487	654	26.5487	716	26.5487	638	26.5487	654	26.5487	656
26.5915	7711	26.5915	3096	26.5915	1330	26.5915	659	26.5915	664	26.5915	778	26.5915	609	26.5915	664	26.5915	632
26.6343	13202	26.6343	5910	26.6343	2098	26.6343	614	26.6343	686	26.6343	904	26.6343	658	26.6343	686	26.6343	680
26.677	17938	26.677	9839	26.677	2586	26.677	676	26.677	680	26.677	1137	26.677	665	26.677	680	26.677	676
26.7198	13175	26.7198	10978	26.7198	1912	26.7198	726	26.7198	681	26.7198	1020	26.7198	764	26.7198	681	26.7198	636
26.7625	7810	26.7625	7449	26.7625	1424	26.7625	696	26.7625	705	26.7625	888	26.7625	778	26.7625	705	26.7625	645
26.8053	2768	26.8053	4218	26.8053	833	26.8053	737	26.8053	671	26.8053	725	26.8053	754	26.8053	671	26.8053	708
26.8481	1285	26.8481	1689	26.8481	695	26.8481	687	26.8481	672	26.8481	647	26.8481	678	26.8481	672	26.8481	651
26.8908	879	26.8908	968	26.8908	629	26.8908	624	26.8908	667	26.8908	630	26.8908	605	26.8908	667	26.8908	710
26.9336	637	26.9336	712	26.9336	642	26.9336	572	26.9336	674	26.9336	615	26.9336	609	26.9336	674	26.9336	662
26.9764	575	26.9764	644	26.9764	648	26.9764	617	26.9764	673	26.9764	636	26.9764	635	26.9764	673	26.9764	656
27.0191	521	27.0191	649	27.0191	558	27.0191	637	27.0191	641	27.0191	659	27.0191	598	27.0191	641	27.0191	627
27.0619	462	27.0619	540	27.0619	593	27.0619	639	27.0619	643	27.0619	645	27.0619	585	27.0619	643	27.0619	663
27.1046	463	27.1046	528	27.1046	679	27.1046	587	27.1046	612	27.1046	650	27.1046	580	27.1046	612	27.1046	654
27.1474	432	27.1474	585	27.1474	561	27.1474	647	27.1474	656	27.1474	643	27.1474	558	27.1474	656	27.1474	644
27.1902	404	27.1902	522	27.1902	580	27.1902	553	27.1902	662	27.1902	722	27.1902	665	27.1902	662	27.1902	640
27.2329	399	27.2329	523	27.2329	597	27.2329	647	27.2329	645	27.2329	611	27.2329	637	27.2329	645	27.2329	675
27.2757	447	27.2757	512	27.2757	593	27.2757	604	27.2757	618	27.2757	622	27.2757	611	27.2757	618	27.2757	658
27.3184	417	27.3184	490	27.3184	558	27.3184	597	27.3184	639	27.3184	639	27.3184	580	27.3184	639	27.3184	653
27.3612	424	27.3612	521	27.3612	620	27.3612	589	27.3612	598	27.3612	607	27.3612	586	27.3612	598	27.3612	663
27.404	425	27.404	522	27.404	565	27.404	574	27.404	668	27.404	640	27.404	585	27.404	668	27.404	686
27.4467	462	27.4467	502	27.4467	549	27.4467	560	27.4467	683	27.4467	614	27.4467	602	27.4467	683	27.4467	692
27.4895	421	27.4895	492	27.4895	562	27.4895	613	27.4895	631	27.4895	599	27.4895	541	27.4895	631	27.4895	635
27.5323	480	27.5323	528	27.5323	585	27.5323	628	27.5323	650	27.5323	617	27.5323	608	27.5323	650	27.5323	625
27.575	452	27.575	514	27.575	565	27.575	553	27.575	619	27.575	599	27.575	588	27.575	619	27.575	647
27.6178	401	27.6178	525	27.6178	566	27.6178	548	27.6178	654	27.6178	618	27.6178	599	27.6178	654	27.6178	652
27.6605	430	27.6605	528	27.6605	588	27.6605	583	27.6605	666	27.6605	579	27.6605	588	27.6605	666	27.6605	580
27.7033	381	27.7033	517	27.7033	605	27.7033	582	27.7033	590	27.7033	651	27.7033	621	27.7033	590	27.7033	661
27.7461	410	27.7461	528	27.7461	584	27.7461	613	27.7461	654	27.7461	655	27.7461	579	27.7461	654	27.7461	621
27.7888	415	27.7888	482	27.7888	570	27.7888	555	27.7888	632	27.7888	622	27.7888	604	27.7888	632	27.7888	598
27.8316	423	27.8316	509	27.8316	564	27.8316	609	27.8316	605	27.8316	633	27.8316	595	27.8316	605	27.8316	551
27.8743	472	27.8743	505	27.8743	578	27.8743	590	27.8743	613	27.8743	651	27.8743	634	27.8743	613	27.8743	609
27.9171	475	27.9171	529	27.9171	552	27.9171	564	27.9171	565	27.9171	622	27.9171	637	27.9171	565	27.9171	635
27.9599	472	27.9599	481	27.9599	550	27.9599	574	27.9599	612	27.9599	638	27.9599	588	27.9599	612	27.9599	593
28.0026	515	28.0026	525	28.0026	521	28.0026	537	28.0026	643	28.0026	635	28.0026	551	28.0026	643	28.0026	584
28.0454	529	28.0454	534	28.0454	578	28.0454	579	28.0454	606	28.0454	629	28.0454	580	28.0454	606	28.0454	614
28.0882	421	28.0882	515	28.0882	567	28.0882	544	28.0882	620	28.0882	594	28.0882	605	28.0882	620	28.0882	574
28.1309	377	28.1309	514	28.1309	578	28.1309	539	28.1309	654	28.1309	584	28.1309	603	28.1309	654	28.1309	629
28.1737	341	28.1737	493	28.1737	554	28.1737	580	28.1737	608	28.1737	589	28.1737	574	28.1737	608	28.1737	589
28.2164	365	28.2164	523	28.2164	552	28.2164	531	28.2164	579	28.2164	573	28.2164	560	28.2164	579	28.2164	643
28.2592	339	28.2592	463	28.2592	505	28.2592	541	28.2592	640	28.2592	617	28.2592	555	28.2592	640	28.2592	587
28.302	342	28.302	472	28.302	570	28.302	537	28.302	636	28.302	559	28.302	571	28.302	636	28.302	633
28.3447	343	28.3447	446	28.3447	595	28.3447	564	28.3447	649	28.3447	622	28.3447	602	28.3447	649	28.3447	622
28.3875	346	28.3875	444	28.3875	614	28.3875	570	28.3875	579	28.3875	576	28.3875	608	28.3875	579	28.3875	602
28.4302	339	28.4302	442	28.4302	631	28.4302	546	28.4302	618	28.4302	555	28.4302	584	28.4302	618	28.4302	578
28.473	374	28.473	494	28.473	552	28.473	567	28.473	593	28.473	565	28.473	582	28.473	593	28.473	587
28.5158	345	28.5158	458	28.5158	505	28.5158	537	28.5158	619	28.5158	549	28.5158	526	28.5158	619	28.5158	595
28.5585	349	28.5585	462	28.5585	601	28.5585	541	28.5585	605	28.5585	547	28.5585	551	28.5585	605	28.5585	582
28.6013	319	28.6013	418	28.6013	512	28.6013	554	28.6013	635	28.6013	559	28.6013	572	28.6013	635	28.6013	592
28.644	328	28.644	487	28.644	509	28.644	545	28.644	657	28.644	574	28.644	549	28.644	657	28.644	576
28.6868	324	28.6868	400	28.6868	535	28.6868	537	28.6868	609	28.6868	543	28.6868	542	28.6868	609	28.6868	604
28.7296	303	28.7296	412	28.7296	529	28.7296	509	28.7296	568	28.7296	588	28.7296	505	28.7296	568	28.7296	584
28.7723	287	28.7723	430	28.7723	484	28.7723	547	28.7723	576	28.7723	568	28.7723	566	28.7723	576	28.7723	605
28.8151	316	28.8151	421	28.8151	527	28.8151	546	28.8151	577	28.8151	589	28.8151	501	28.8151	577	28.8151	583
28.8579	299	28.8579	432	28.8579	490	28.8579	499	28.8579	641	28.8579	563	28.8579	533	28.8579	641	28.8579	614
28.9006	324	28.9006	429	28.9006	503	28.9006	517	28.9006	586	28.9006	502	28.9006	524	28.9006	586	28.9006	573
28.9434	328	28.9434	422	28.9434	516	28.9434	474	28.9434	593	28.9434	545	28.9434	532	28.9434	593	28.9434	586
28.9861	281	28.9861	404	28.9861	498	28.9861	491	28.9861	552	28.9861	584	28.9861	545	28.9861	552	28.9861	577
29.0289	275	29.0289	414	29.0289	529	29.0289	545	29.0289	613	29.0289	557	29.0289	526	29.0289	613	29.0289	563
29.0717	294	29.0717	433	29.0717	494	29.0717	566	29.0717	561	29.0717	535	29.0717	549	29.0717	561	29.0717	555
29.1144	281	29.1144	396	29.1144	528	29.1144	563	29.1144	593	29.1144	555	29.1144	542	29.1144	593	29.1144	511
29.1572	297	29.1572	433	29.1572	452	29.1572	517	29.1572	580	29.1572	571	29.1572	513	29.1572	580	29.1572	513
29.1999	284	29.1999	372	29.1999	476	29.1999	518	29.1999	585	29.1999	534	29.1999	501	29.1999	585	29.1999	602
29.2427	270	29.2427	414	29.2427	453	29.2427	518	29.2427	595	29.2427	543	29.2427	533	29.2427	595	29.2427	597
29.2855	273	29.2855	394	29.2855	463	29.2855	520	29.2855	557	29.2855	580	29.2855	519	29.2855	557	29.2855	569
29.3282	311	29.3282	415	29.3282	477	29.3282	515	29.3282	538	29.3282	562	29.3282	542	29.3282	538	29.3282	610
29.371	288	29.371	408	29.371	459	29.371	496	29.371	557	29.371	583	29.371	567	29.371	557	29.371	574
29.4138	263	29.4138	395	29.4138	494	29.4138	485	29.4138	580	29.4138	548	29.4138	526	29.4138	580	29.4138	555
29.4565	268	29.4565	419	29.4565	492	29.4565	507	29.4565	567	29.4565	520	29.4565	496	29.4565	567	29.4565	558
29.4993	315	29.4993	393	29.4993	470	29.4993	515	29.4993	584	29.4993	522	29.4993	466	29.4993	584	29.4993	550
29.542	272	29.542	342	29.542	464	29.542	457	29.542	548	29.542	501	29.542	520	29.542	548	29.542	567
29.5848	294	29.5848	388	29.5848	499	29.5848	479	29.5848	582	29.5848	559	29.5848	537	29.5848	582	29.5848	542
29.6276	297	29.6276	378	29.6276	489	29.6276	496	29.6276	557	29.6276	551	29.6276	505	29.6276	557	29.6276	525
29.6703	283	29.6703	373	29.6703	514	29.6703	486	29.6703	563	29.6703	513	29.6703	481	29.6703	563	29.6703	566
29.7131	259	29.7131	425	29.7131	493	29.7131	503	29.7131	550	29.7131	551	29.7131	467	29.7131	550	29.7131	542
29.7558	253	29.7558	408	29.7558	506	29.7558	505	29.7558	586	29.7558	567	29.7558	517	29.7558	586	29.7558	580
29.7986	277	29.7986	395	29.7986	475	29.7986	508	29.7986	535	29.7986	547	29.7986	486	29.7986	535	29.7986	569
29.8414	287	29.8414	424	29.8414	470	29.8414	526	29.8414	591	29.8414	555	29.8414	505	29.8414	591	29.8414	606
29.8841	269	29.8841	372	29.8841	471	29.8841	505	29.8841	546	29.8841	527	29.8841	486	29.8841	546	29.8841	576
29.9269	293	29.9269	368	29.9269	466	29.9269	467	29.9269	602	29.9269	536	29.9269	470	29.9269	602	29.9269	598
29.9697	287	29.9697	392	29.9697	423	29.9697	522	29.9697	559	29.9697	523	29.9697	506	29.9697	559	29.9697	547
30.0124	264	30.0124	367	30.0124	509	30.0124	472	30.0124	525	30.0124	576	30.0124	519	30.0124	525	30.0124	544
30.0552	251	30.0552	370	30.0552	481	30.0552	484	30.0552	584	30.0552	543	30.0552	512	30.0552	584	30.0552	498
30.0979	283	30.0979	369	30.0979	456	30.0979	494	30.0979	550	30.0979	526	30.0979	553	30.0979	550	30.0979	545
30.1407	288	30.1407	386	30.1407	463	30.1407	495	30.1407	500	30.1407	549	30.1407	492	30.1407	500	30.1407	540
30.1835	281	30.1835	400	30.1835	454	30.1835	477	30.1835	489	30.1835	547	30.1835	495	30.1835	489	30.1835	519
30.2262	245	30.2262	409	30.2262	462	30.2262	489	30.2262	557	30.2262	500	30.2262	483	30.2262	557	30.2262	544
30.269	262	30.269	400	30.269	437	30.269	447	30.269	551	30.269	563	30.269	508	30.269	551	30.269	507
30.3117	278	30.3117	393	30.3117	460	30.3117	466	30.3117	527	30.3117	492	30.3117	500	30.3117	527	30.3117	524
30.3545	308	30.3545	406	30.3545	431	30.3545	491	30.3545	569	30.3545	508	30.3545	475	30.3545	569	30.3545	511
30.3973	279	30.3973	409	30.3973	420	30.3973	462	30.3973	553	30.3973	494	30.3973	491	30.3973	553	30.3973	516
30.44	302	30.44	365	30.44	462	30.44	481	30.44	538	30.44	548	30.44	491	30.44	538	30.44	552
30.4828	240	30.4828	385	30.4828	459	30.4828	460	30.4828	534	30.4828	490	30.4828	511	30.4828	534	30.4828	520
30.5255	286	30.5255	395	30.5255	401	30.5255	469	30.5255	508	30.5255	490	30.5255	452	30.5255	508	30.5255	561
30.5683	270	30.5683	405	30.5683	470	30.5683	454	30.5683	536	30.5683	501	30.5683	466	30.5683	536	30.5683	515
30.6111	257	30.6111	344	30.6111	446	30.6111	456	30.6111	530	30.6111	539	30.6111	516	30.6111	530	30.6111	490
30.6538	262	30.6538	383	30.6538	401	30.6538	456	30.6538	534	30.6538	525	30.6538	508	30.6538	534	30.6538	534
30.6966	263	30.6966	360	30.6966	434	30.6966	482	30.6966	527	30.6966	512	30.6966	470	30.6966	527	30.6966	535
30.7394	264	30.7394	400	30.7394	416	30.7394	482	30.7394	471	30.7394	480	30.7394	514	30.7394	471	30.7394	519
30.7821	302	30.7821	348	30.7821	414	30.7821	503	30.7821	504	30.7821	502	30.7821	461	30.7821	504	30.7821	542
30.8249	275	30.8249	350	30.8249	445	30.8249	449	30.8249	542	30.8249	502	30.8249	447	30.8249	542	30.8249	531
30.8676	294	30.8676	400	30.8676	436	30.8676	463	30.8676	513	30.8676	492	30.8676	422	30.8676	513	30.8676	502
30.9104	304	30.9104	367	30.9104	440	30.9104	466	30.9104	529	30.9104	494	30.9104	438	30.9104	529	30.9104	561
30.9532	293	30.9532	357	30.9532	422	30.9532	407	30.9532	532	30.9532	507	30.9532	487	30.9532	532	30.9532	513
30.9959	327	30.9959	342	30.9959	428	30.9959	390	30.9959	537	30.9959	536	30.9959	440	30.9959	537	30.9959	523
31.0387	359	31.0387	376	31.0387	459	31.0387	470	31.0387	527	31.0387	481	31.0387	482	31.0387	527	31.0387	510
31.0814	354	31.0814	321	31.0814	437	31.0814	448	31.0814	481	31.0814	554	31.0814	464	31.0814	481	31.0814	506
31.1242	387	31.1242	367	31.1242	473	31.1242	461	31.1242	480	31.1242	489	31.1242	445	31.1242	480	31.1242	514
31.167	404	31.167	354	31.167	437	31.167	436	31.167	514	31.167	511	31.167	472	31.167	514	31.167	496
31.2097	345	31.2097	345	31.2097	471	31.2097	415	31.2097	484	31.2097	480	31.2097	455	31.2097	484	31.2097	533
31.2525	302	31.2525	372	31.2525	431	31.2525	463	31.2525	532	31.2525	501	31.2525	473	31.2525	532	31.2525	477
31.2953	294	31.2953	380	31.2953	466	31.2953	444	31.2953	479	31.2953	482	31.2953	501	31.2953	479	31.2953	468
31.338	295	31.338	358	31.338	498	31.338	428	31.338	523	31.338	476	31.338	464	31.338	523	31.338	514
31.3808	271	31.3808	374	31.3808	473	31.3808	448	31.3808	487	31.3808	481	31.3808	471	31.3808	487	31.3808	509
31.4235	249	31.4235	384	31.4235	490	31.4235	462	31.4235	507	31.4235	475	31.4235	487	31.4235	507	31.4235	438
31.4663	255	31.4663	363	31.4663	448	31.4663	445	31.4663	489	31.4663	484	31.4663	436	31.4663	489	31.4663	507
31.5091	272	31.5091	356	31.5091	455	31.5091	437	31.5091	504	31.5091	481	31.5091	437	31.5091	504	31.5091	467
31.5518	244	31.5518	340	31.5518	409	31.5518	441	31.5518	514	31.5518	520	31.5518	442	31.5518	514	31.5518	485
31.5946	265	31.5946	340	31.5946	424	31.5946	437	31.5946	526	31.5946	496	31.5946	469	31.5946	526	31.5946	495
31.6373	250	31.6373	359	31.6373	445	31.6373	435	31.6373	490	31.6373	427	31.6373	477	31.6373	490	31.6373	496
31.6801	268	31.6801	333	31.6801	411	31.6801	390	31.6801	492	31.6801	444	31.6801	446	31.6801	492	31.6801	508
31.7229	240	31.7229	325	31.7229	454	31.7229	428	31.7229	505	31.7229	498	31.7229	460	31.7229	505	31.7229	459
31.7656	246	31.7656	352	31.7656	378	31.7656	417	31.7656	493	31.7656	465	31.7656	435	31.7656	493	31.7656	507
31.8084	233	31.8084	358	31.8084	404	31.8084	438	31.8084	527	31.8084	456	31.8084	452	31.8084	527	31.8084	433
31.8511	247	31.8511	310	31.8511	407	31.8511	380	31.8511	486	31.8511	451	31.8511	427	31.8511	486	31.8511	491
31.8939	247	31.8939	353	31.8939	402	31.8939	436	31.8939	458	31.8939	442	31.8939	427	31.8939	458	31.8939	443
31.9367	204	31.9367	313	31.9367	396	31.9367	427	31.9367	515	31.9367	418	31.9367	438	31.9367	515	31.9367	481
31.9794	250	31.9794	299	31.9794	407	31.9794	418	31.9794	447	31.9794	501	31.9794	484	31.9794	447	31.9794	455
32.0222	256	32.0222	317	32.0222	383	32.0222	407	32.0222	462	32.0222	448	32.0222	419	32.0222	462	32.0222	475
32.065	232	32.065	317	32.065	375	32.065	443	32.065	497	32.065	462	32.065	441	32.065	497	32.065	453
32.1077	264	32.1077	295	32.1077	386	32.1077	385	32.1077	470	32.1077	421	32.1077	434	32.1077	470	32.1077	474
32.1505	252	32.1505	336	32.1505	418	32.1505	437	32.1505	460	32.1505	460	32.1505	423	32.1505	460	32.1505	468
32.1932	255	32.1932	310	32.1932	396	32.1932	377	32.1932	510	32.1932	438	32.1932	388	32.1932	510	32.1932	460
32.236	227	32.236	325	32.236	411	32.236	410	32.236	473	32.236	471	32.236	452	32.236	473	32.236	450
32.2788	219	32.2788	331	32.2788	398	32.2788	409	32.2788	476	32.2788	479	32.2788	401	32.2788	476	32.2788	452
32.3215	227	32.3215	338	32.3215	366	32.3215	419	32.3215	442	32.3215	450	32.3215	416	32.3215	442	32.3215	470
32.3643	231	32.3643	353	32.3643	414	32.3643	391	32.3643	487	32.3643	416	32.3643	446	32.3643	487	32.3643	439
32.407	247	32.407	325	32.407	391	32.407	381	32.407	471	32.407	446	32.407	409	32.407	471	32.407	488
32.4498	205	32.4498	311	32.4498	415	32.4498	412	32.4498	467	32.4498	437	32.4498	437	32.4498	467	32.4498	433
32.4926	227	32.4926	320	32.4926	363	32.4926	403	32.4926	464	32.4926	416	32.4926	421	32.4926	464	32.4926	468
32.5353	238	32.5353	308	32.5353	397	32.5353	374	32.5353	433	32.5353	425	32.5353	382	32.5353	433	32.5353	447
32.5781	227	32.5781	332	32.5781	368	32.5781	421	32.5781	453	32.5781	450	32.5781	436	32.5781	453	32.5781	432
32.6209	235	32.6209	313	32.6209	352	32.6209	375	32.6209	509	32.6209	434	32.6209	415	32.6209	509	32.6209	466
32.6636	241	32.6636	342	32.6636	404	32.6636	415	32.6636	447	32.6636	446	32.6636	440	32.6636	447	32.6636	489
32.7064	229	32.7064	321	32.7064	376	32.7064	393	32.7064	451	32.7064	445	32.7064	414	32.7064	451	32.7064	478
32.7491	223	32.7491	301	32.7491	359	32.7491	393	32.7491	459	32.7491	445	32.7491	406	32.7491	459	32.7491	462
32.7919	219	32.7919	269	32.7919	393	32.7919	408	32.7919	456	32.7919	425	32.7919	404	32.7919	456	32.7919	470
32.8347	276	32.8347	281	32.8347	385	32.8347	392	32.8347	449	32.8347	453	32.8347	394	32.8347	449	32.8347	470
32.8774	223	32.8774	340	32.8774	366	32.8774	414	32.8774	487	32.8774	434	32.8774	410	32.8774	487	32.8774	446
32.9202	219	32.9202	318	32.9202	401	32.9202	413	32.9202	415	32.9202	426	32.9202	400	32.9202	415	32.9202	448
32.9629	203	32.9629	292	32.9629	371	32.9629	399	32.9629	420	32.9629	416	32.9629	381	32.9629	420	32.9629	442
33.0057	230	33.0057	324	33.0057	375	33.0057	386	33.0057	457	33.0057	404	33.0057	429	33.0057	457	33.0057	436
33.0485	233	33.0485	315	33.0485	362	33.0485	389	33.0485	434	33.0485	455	33.0485	365	33.0485	434	33.0485	416
33.0912	234	33.0912	312	33.0912	352	33.0912	395	33.0912	434	33.0912	378	33.0912	369	33.0912	434	33.0912	394
33.134	233	33.134	312	33.134	387	33.134	372	33.134	466	33.134	426	33.134	416	33.134	466	33.134	452
33.1768	282	33.1768	349	33.1768	383	33.1768	370	33.1768	446	33.1768	416	33.1768	396	33.1768	446	33.1768	409
33.2195	283	33.2195	383	33.2195	386	33.2195	390	33.2195	462	33.2195	399	33.2195	421	33.2195	462	33.2195	413
33.2623	377	33.2623	479	33.2623	377	33.2623	363	33.2623	430	33.2623	382	33.2623	432	33.2623	430	33.2623	431
33.305	484	33.305	512	33.305	342	33.305	404	33.305	440	33.305	393	33.305	415	33.305	440	33.305	466
33.3478	488	33.3478	472	33.3478	359	33.3478	391	33.3478	421	33.3478	410	33.3478	417	33.3478	421	33.3478	430
33.3906	547	33.3906	412	33.3906	361	33.3906	384	33.3906	434	33.3906	423	33.3906	435	33.3906	434	33.3906	431
33.4333	537	33.4333	327	33.4333	361	33.4333	379	33.4333	433	33.4333	438	33.4333	403	33.4333	433	33.4333	455
33.4761	430	33.4761	284	33.4761	420	33.4761	385	33.4761	422	33.4761	414	33.4761	378	33.4761	422	33.4761	449
33.5188	330	33.5188	282	33.5188	341	33.5188	368	33.5188	413	33.5188	410	33.5188	393	33.5188	413	33.5188	400
33.5616	294	33.5616	275	33.5616	358	33.5616	336	33.5616	409	33.5616	387	33.5616	352	33.5616	409	33.5616	454
33.6044	254	33.6044	269	33.6044	324	33.6044	344	33.6044	444	33.6044	414	33.6044	400	33.6044	444	33.6044	413
33.6471	218	33.6471	292	33.6471	347	33.6471	351	33.6471	404	33.6471	407	33.6471	391	33.6471	404	33.6471	434
33.6899	216	33.6899	293	33.6899	336	33.6899	384	33.6899	416	33.6899	427	33.6899	351	33.6899	416	33.6899	395
33.7326	220	33.7326	266	33.7326	344	33.7326	356	33.7326	428	33.7326	371	33.7326	436	33.7326	428	33.7326	441
33.7754	226	33.7754	293	33.7754	372	33.7754	351	33.7754	429	33.7754	412	33.7754	385	33.7754	429	33.7754	389
33.8182	228	33.8182	297	33.8182	330	33.8182	367	33.8182	399	33.8182	409	33.8182	391	33.8182	399	33.8182	442
33.8609	214	33.8609	265	33.8609	331	33.8609	356	33.8609	408	33.8609	383	33.8609	403	33.8609	408	33.8609	423
33.9037	223	33.9037	267	33.9037	331	33.9037	342	33.9037	400	33.9037	383	33.9037	375	33.9037	400	33.9037	399
33.9465	189	33.9465	288	33.9465	343	33.9465	306	33.9465	405	33.9465	395	33.9465	364	33.9465	405	33.9465	394
33.9892	226	33.9892	272	33.9892	346	33.9892	366	33.9892	425	33.9892	426	33.9892	423	33.9892	425	33.9892	402
34.032	199	34.032	268	34.032	349	34.032	371	34.032	406	34.032	393	34.032	390	34.032	406	34.032	389
34.0747	190	34.0747	263	34.0747	326	34.0747	348	34.0747	418	34.0747	370	34.0747	345	34.0747	418	34.0747	357
34.1175	198	34.1175	256	34.1175	360	34.1175	347	34.1175	392	34.1175	428	34.1175	373	34.1175	392	34.1175	410
34.1603	197	34.1603	279	34.1603	325	34.1603	360	34.1603	407	34.1603	368	34.1603	389	34.1603	407	34.1603	419
34.203	195	34.203	303	34.203	326	34.203	340	34.203	401	34.203	370	34.203	371	34.203	401	34.203	388
34.2458	191	34.2458	272	34.2458	339	34.2458	333	34.2458	398	34.2458	391	34.2458	341	34.2458	398	34.2458	389
34.2885	210	34.2885	273	34.2885	354	34.2885	340	34.2885	416	34.2885	420	34.2885	349	34.2885	416	34.2885	410
34.3313	185	34.3313	273	34.3313	357	34.3313	368	34.3313	410	34.3313	401	34.3313	371	34.3313	410	34.3313	390
34.3741	201	34.3741	274	34.3741	345	34.3741	362	34.3741	368	34.3741	384	34.3741	326	34.3741	368	34.3741	372
34.4168	215	34.4168	247	34.4168	365	34.4168	345	34.4168	380	34.4168	345	34.4168	354	34.4168	380	34.4168	394
34.4596	196	34.4596	263	34.4596	335	34.4596	318	34.4596	369	34.4596	394	34.4596	370	34.4596	369	34.4596	407
34.5024	153	34.5024	278	34.5024	306	34.5024	335	34.5024	411	34.5024	408	34.5024	342	34.5024	411	34.5024	403
34.5451	155	34.5451	259	34.5451	314	34.5451	336	34.5451	365	34.5451	383	34.5451	363	34.5451	365	34.5451	356
34.5879	217	34.5879	281	34.5879	323	34.5879	352	34.5879	401	34.5879	352	34.5879	362	34.5879	401	34.5879	392
34.6306	178	34.6306	240	34.6306	326	34.6306	334	34.6306	400	34.6306	404	34.6306	358	34.6306	400	34.6306	388
34.6734	182	34.6734	245	34.6734	309	34.6734	334	34.6734	391	34.6734	386	34.6734	389	34.6734	391	34.6734	412
34.7162	183	34.7162	280	34.7162	352	34.7162	327	34.7162	382	34.7162	356	34.7162	354	34.7162	382	34.7162	403
34.7589	197	34.7589	281	34.7589	298	34.7589	352	34.7589	393	34.7589	378	34.7589	383	34.7589	393	34.7589	385
34.8017	172	34.8017	256	34.8017	318	34.8017	330	34.8017	407	34.8017	364	34.8017	349	34.8017	407	34.8017	375
34.8444	196	34.8444	230	34.8444	336	34.8444	357	34.8444	368	34.8444	357	34.8444	329	34.8444	368	34.8444	398
34.8872	207	34.8872	262	34.8872	324	34.8872	332	34.8872	348	34.8872	379	34.8872	395	34.8872	348	34.8872	381
34.93	203	34.93	261	34.93	337	34.93	342	34.93	348	34.93	347	34.93	327	34.93	348	34.93	408
34.9727	202	34.9727	260	34.9727	332	34.9727	344	34.9727	370	34.9727	367	34.9727	326	34.9727	370	34.9727	380
35.0155	203	35.0155	249	35.0155	336	35.0155	323	35.0155	413	35.0155	320	35.0155	354	35.0155	413	35.0155	386
35.0583	194	35.0583	285	35.0583	303	35.0583	320	35.0583	333	35.0583	361	35.0583	350	35.0583	333	35.0583	365
35.101	204	35.101	239	35.101	282	35.101	324	35.101	332	35.101	373	35.101	339	35.101	332	35.101	368
35.1438	212	35.1438	268	35.1438	322	35.1438	330	35.1438	344	35.1438	351	35.1438	349	35.1438	344	35.1438	348
35.1865	236	35.1865	242	35.1865	330	35.1865	321	35.1865	395	35.1865	323	35.1865	313	35.1865	395	35.1865	336
35.2293	215	35.2293	276	35.2293	295	35.2293	311	35.2293	373	35.2293	339	35.2293	360	35.2293	373	35.2293	369
35.2721	239	35.2721	232	35.2721	317	35.2721	372	35.2721	336	35.2721	314	35.2721	320	35.2721	336	35.2721	373
35.3148	208	35.3148	248	35.3148	305	35.3148	288	35.3148	332	35.3148	355	35.3148	354	35.3148	332	35.3148	367
35.3576	193	35.3576	254	35.3576	292	35.3576	344	35.3576	376	35.3576	361	35.3576	323	35.3576	376	35.3576	369
35.4003	210	35.4003	249	35.4003	299	35.4003	314	35.4003	363	35.4003	300	35.4003	326	35.4003	363	35.4003	339
35.4431	207	35.4431	274	35.4431	293	35.4431	310	35.4431	352	35.4431	326	35.4431	349	35.4431	352	35.4431	347
35.4859	205	35.4859	280	35.4859	338	35.4859	352	35.4859	336	35.4859	318	35.4859	316	35.4859	336	35.4859	384
35.5286	220	35.5286	276	35.5286	296	35.5286	305	35.5286	369	35.5286	372	35.5286	332	35.5286	369	35.5286	348
35.5714	212	35.5714	291	35.5714	307	35.5714	312	35.5714	367	35.5714	319	35.5714	348	35.5714	367	35.5714	337
35.6141	219	35.6141	320	35.6141	335	35.6141	288	35.6141	347	35.6141	351	35.6141	324	35.6141	347	35.6141	346
35.6569	278	35.6569	358	35.6569	336	35.6569	312	35.6569	408	35.6569	310	35.6569	334	35.6569	408	35.6569	358
35.6997	352	35.6997	469	35.6997	318	35.6997	304	35.6997	354	35.6997	349	35.6997	310	35.6997	354	35.6997	323
35.7424	370	35.7424	473	35.7424	322	35.7424	307	35.7424	314	35.7424	360	35.7424	317	35.7424	314	35.7424	323
35.7852	419	35.7852	467	35.7852	359	35.7852	295	35.7852	379	35.7852	354	35.7852	326	35.7852	379	35.7852	353
35.828	434	35.828	390	35.828	360	35.828	305	35.828	350	35.828	371	35.828	305	35.828	350	35.828	341
35.8707	444	35.8707	402	35.8707	377	35.8707	312	35.8707	334	35.8707	350	35.8707	348	35.8707	334	35.8707	335
35.9135	322	35.9135	380	35.9135	368	35.9135	313	35.9135	349	35.9135	344	35.9135	298	35.9135	349	35.9135	348
35.9562	303	35.9562	364	35.9562	347	35.9562	324	35.9562	350	35.9562	345	35.9562	331	35.9562	350	35.9562	323
35.999	208	35.999	361	35.999	408	35.999	351	35.999	345	35.999	343	35.999	328	35.999	345	35.999	358
36.0418	258	36.0418	345	36.0418	444	36.0418	339	36.0418	327	36.0418	367	36.0418	325	36.0418	327	36.0418	359
36.0845	192	36.0845	343	36.0845	417	36.0845	337	36.0845	356	36.0845	329	36.0845	298	36.0845	356	36.0845	334
36.1273	224	36.1273	359	36.1273	439	36.1273	308	36.1273	331	36.1273	330	36.1273	336	36.1273	331	36.1273	367
36.17	237	36.17	330	36.17	379	36.17	309	36.17	336	36.17	299	36.17	328	36.17	336	36.17	346
36.2128	249	36.2128	325	36.2128	394	36.2128	315	36.2128	305	36.2128	343	36.2128	304	36.2128	305	36.2128	329
36.2556	242	36.2556	338	36.2556	385	36.2556	291	36.2556	319	36.2556	336	36.2556	299	36.2556	319	36.2556	326
36.2983	306	36.2983	338	36.2983	344	36.2983	277	36.2983	321	36.2983	342	36.2983	276	36.2983	321	36.2983	294
36.3411	363	36.3411	313	36.3411	390	36.3411	318	36.3411	319	36.3411	334	36.3411	326	36.3411	319	36.3411	293
36.3839	476	36.3839	366	36.3839	330	36.3839	315	36.3839	331	36.3839	317	36.3839	319	36.3839	331	36.3839	329
36.4266	599	36.4266	416	36.4266	337	36.4266	322	36.4266	321	36.4266	312	36.4266	312	36.4266	321	36.4266	285
36.4694	731	36.4694	529	36.4694	344	36.4694	289	36.4694	289	36.4694	336	36.4694	299	36.4694	289	36.4694	335
36.5121	1068	36.5121	580	36.5121	354	36.5121	322	36.5121	323	36.5121	332	36.5121	324	36.5121	323	36.5121	313
36.5549	1293	36.5549	767	36.5549	409	36.5549	307	36.5549	298	36.5549	372	36.5549	311	36.5549	298	36.5549	334
36.5977	1372	36.5977	873	36.5977	382	36.5977	305	36.5977	308	36.5977	375	36.5977	362	36.5977	308	36.5977	336
36.6404	1039	36.6404	725	36.6404	358	36.6404	287	36.6404	332	36.6404	323	36.6404	347	36.6404	332	36.6404	329
36.6832	888	36.6832	602	36.6832	321	36.6832	316	36.6832	362	36.6832	332	36.6832	338	36.6832	362	36.6832	299
36.7259	642	36.7259	484	36.7259	280	36.7259	272	36.7259	323	36.7259	301	36.7259	325	36.7259	323	36.7259	308
36.7687	454	36.7687	331	36.7687	285	36.7687	279	36.7687	323	36.7687	299	36.7687	279	36.7687	323	36.7687	323
36.8115	371	36.8115	293	36.8115	283	36.8115	292	36.8115	282	36.8115	300	36.8115	285	36.8115	282	36.8115	292
36.8542	298	36.8542	274	36.8542	265	36.8542	289	36.8542	297	36.8542	305	36.8542	277	36.8542	297	36.8542	304
36.897	265	36.897	272	36.897	327	36.897	287	36.897	333	36.897	277	36.897	298	36.897	333	36.897	335
36.9398	243	36.9398	237	36.9398	268	36.9398	292	36.9398	348	36.9398	302	36.9398	307	36.9398	348	36.9398	337
36.9825	239	36.9825	226	36.9825	284	36.9825	297	36.9825	289	36.9825	309	36.9825	280	36.9825	289	36.9825	312
37.0253	208	37.0253	230	37.0253	248	37.0253	272	37.0253	312	37.0253	307	37.0253	265	37.0253	312	37.0253	303
37.068	213	37.068	236	37.068	285	37.068	281	37.068	298	37.068	316	37.068	294	37.068	298	37.068	291
37.1108	194	37.1108	205	37.1108	267	37.1108	287	37.1108	306	37.1108	316	37.1108	312	37.1108	306	37.1108	322
37.1536	175	37.1536	222	37.1536	279	37.1536	278	37.1536	297	37.1536	275	37.1536	281	37.1536	297	37.1536	311
37.1963	183	37.1963	224	37.1963	246	37.1963	249	37.1963	300	37.1963	273	37.1963	275	37.1963	300	37.1963	343
37.2391	189	37.2391	227	37.2391	258	37.2391	294	37.2391	301	37.2391	279	37.2391	242	37.2391	301	37.2391	327
37.2818	166	37.2818	255	37.2818	278	37.2818	263	37.2818	302	37.2818	306	37.2818	290	37.2818	302	37.2818	312
37.3246	201	37.3246	219	37.3246	262	37.3246	273	37.3246	275	37.3246	288	37.3246	299	37.3246	275	37.3246	291
37.3674	162	37.3674	258	37.3674	258	37.3674	282	37.3674	296	37.3674	283	37.3674	283	37.3674	296	37.3674	320
37.4101	193	37.4101	218	37.4101	275	37.4101	292	37.4101	266	37.4101	276	37.4101	288	37.4101	266	37.4101	327
37.4529	178	37.4529	205	37.4529	272	37.4529	295	37.4529	306	37.4529	276	37.4529	264	37.4529	306	37.4529	266
37.4956	162	37.4956	220	37.4956	254	37.4956	291	37.4956	299	37.4956	273	37.4956	262	37.4956	299	37.4956	299
37.5384	180	37.5384	203	37.5384	270	37.5384	265	37.5384	284	37.5384	271	37.5384	265	37.5384	284	37.5384	294
37.5812	196	37.5812	223	37.5812	288	37.5812	279	37.5812	288	37.5812	255	37.5812	287	37.5812	288	37.5812	291
37.6239	200	37.6239	206	37.6239	275	37.6239	262	37.6239	322	37.6239	310	37.6239	279	37.6239	322	37.6239	294
37.6667	152	37.6667	195	37.6667	241	37.6667	274	37.6667	319	37.6667	324	37.6667	256	37.6667	319	37.6667	301
37.7095	171	37.7095	216	37.7095	268	37.7095	255	37.7095	299	37.7095	311	37.7095	288	37.7095	299	37.7095	304
37.7522	158	37.7522	207	37.7522	247	37.7522	249	37.7522	280	37.7522	260	37.7522	301	37.7522	280	37.7522	294
37.795	174	37.795	201	37.795	265	37.795	279	37.795	264	37.795	285	37.795	297	37.795	264	37.795	300
37.8377	194	37.8377	189	37.8377	278	37.8377	229	37.8377	301	37.8377	263	37.8377	299	37.8377	301	37.8377	265
37.8805	159	37.8805	218	37.8805	257	37.8805	263	37.8805	278	37.8805	268	37.8805	244	37.8805	278	37.8805	277
37.9233	162	37.9233	222	37.9233	282	37.9233	267	37.9233	248	37.9233	293	37.9233	282	37.9233	248	37.9233	287
37.966	145	37.966	198	37.966	243	37.966	251	37.966	251	37.966	291	37.966	267	37.966	251	37.966	287
38.0088	154	38.0088	220	38.0088	273	38.0088	269	38.0088	321	38.0088	291	38.0088	284	38.0088	321	38.0088	279
38.0515	175	38.0515	221	38.0515	263	38.0515	277	38.0515	279	38.0515	276	38.0515	259	38.0515	279	38.0515	289
38.0943	184	38.0943	172	38.0943	251	38.0943	294	38.0943	261	38.0943	274	38.0943	256	38.0943	261	38.0943	265
38.1371	162	38.1371	209	38.1371	231	38.1371	276	38.1371	283	38.1371	242	38.1371	264	38.1371	283	38.1371	297
38.1798	154	38.1798	204	38.1798	263	38.1798	264	38.1798	300	38.1798	255	38.1798	255	38.1798	300	38.1798	266
38.2226	155	38.2226	218	38.2226	289	38.2226	289	38.2226	293	38.2226	258	38.2226	258	38.2226	293	38.2226	281
38.2654	144	38.2654	207	38.2654	251	38.2654	246	38.2654	269	38.2654	278	38.2654	254	38.2654	269	38.2654	272
38.3081	176	38.3081	203	38.3081	236	38.3081	227	38.3081	274	38.3081	282	38.3081	233	38.3081	274	38.3081	294
38.3509	168	38.3509	221	38.3509	235	38.3509	236	38.3509	298	38.3509	282	38.3509	256	38.3509	298	38.3509	305
38.3936	161	38.3936	206	38.3936	277	38.3936	260	38.3936	261	38.3936	283	38.3936	273	38.3936	261	38.3936	262
38.4364	151	38.4364	195	38.4364	253	38.4364	233	38.4364	270	38.4364	286	38.4364	260	38.4364	270	38.4364	279
38.4792	138	38.4792	193	38.4792	238	38.4792	252	38.4792	244	38.4792	262	38.4792	262	38.4792	244	38.4792	301
38.5219	157	38.5219	211	38.5219	241	38.5219	271	38.5219	265	38.5219	268	38.5219	238	38.5219	265	38.5219	286
38.5647	167	38.5647	205	38.5647	243	38.5647	249	38.5647	263	38.5647	258	38.5647	267	38.5647	263	38.5647	327
38.6074	144	38.6074	185	38.6074	247	38.6074	224	38.6074	273	38.6074	259	38.6074	283	38.6074	273	38.6074	306
38.6502	165	38.6502	200	38.6502	244	38.6502	224	38.6502	255	38.6502	249	38.6502	256	38.6502	255	38.6502	273
38.693	158	38.693	224	38.693	228	38.693	253	38.693	272	38.693	269	38.693	258	38.693	272	38.693	280
38.7357	176	38.7357	196	38.7357	220	38.7357	244	38.7357	273	38.7357	272	38.7357	238	38.7357	273	38.7357	275
38.7785	147	38.7785	211	38.7785	273	38.7785	241	38.7785	271	38.7785	245	38.7785	246	38.7785	271	38.7785	255
38.8212	148	38.8212	194	38.8212	225	38.8212	220	38.8212	259	38.8212	265	38.8212	240	38.8212	259	38.8212	291
38.864	146	38.864	221	38.864	234	38.864	262	38.864	260	38.864	260	38.864	267	38.864	260	38.864	276
38.9068	149	38.9068	178	38.9068	232	38.9068	217	38.9068	267	38.9068	323	38.9068	242	38.9068	267	38.9068	275
38.9495	168	38.9495	221	38.9495	248	38.9495	232	38.9495	257	38.9495	244	38.9495	269	38.9495	257	38.9495	281
38.9923	162	38.9923	194	38.9923	247	38.9923	258	38.9923	291	38.9923	256	38.9923	248	38.9923	291	38.9923	284
39.0351	166	39.0351	223	39.0351	256	39.0351	235	39.0351	278	39.0351	266	39.0351	248	39.0351	278	39.0351	274
39.0778	155	39.0778	192	39.0778	208	39.0778	261	39.0778	301	39.0778	273	39.0778	265	39.0778	301	39.0778	289
39.1206	181	39.1206	213	39.1206	198	39.1206	254	39.1206	283	39.1206	248	39.1206	262	39.1206	283	39.1206	266
39.1633	192	39.1633	197	39.1633	268	39.1633	258	39.1633	293	39.1633	288	39.1633	241	39.1633	293	39.1633	302
39.2061	168	39.2061	201	39.2061	246	39.2061	242	39.2061	284	39.2061	282	39.2061	247	39.2061	284	39.2061	260
39.2489	194	39.2489	189	39.2489	258	39.2489	242	39.2489	281	39.2489	273	39.2489	215	39.2489	281	39.2489	288
39.2916	209	39.2916	234	39.2916	245	39.2916	249	39.2916	280	39.2916	226	39.2916	250	39.2916	280	39.2916	252
39.3344	285	39.3344	244	39.3344	248	39.3344	264	39.3344	256	39.3344	236	39.3344	284	39.3344	256	39.3344	259
39.3771	393	39.3771	277	39.3771	253	39.3771	254	39.3771	275	39.3771	260	39.3771	213	39.3771	275	39.3771	270
39.4199	550	39.4199	366	39.4199	270	39.4199	236	39.4199	283	39.4199	274	39.4199	282	39.4199	283	39.4199	246
39.4627	821	39.4627	531	39.4627	315	39.4627	241	39.4627	248	39.4627	246	39.4627	243	39.4627	248	39.4627	276
39.5054	943	39.5054	712	39.5054	284	39.5054	261	39.5054	266	39.5054	251	39.5054	234	39.5054	266	39.5054	286
39.5482	718	39.5482	741	39.5482	310	39.5482	263	39.5482	248	39.5482	275	39.5482	247	39.5482	248	39.5482	267
39.591	574	39.591	584	39.591	296	39.591	235	39.591	277	39.591	305	39.591	247	39.591	277	39.591	278
39.6337	413	39.6337	515	39.6337	279	39.6337	258	39.6337	251	39.6337	236	39.6337	234	39.6337	251	39.6337	226
39.6765	237	39.6765	392	39.6765	228	39.6765	254	39.6765	268	39.6765	261	39.6765	288	39.6765	268	39.6765	243
39.7192	190	39.7192	238	39.7192	252	39.7192	248	39.7192	287	39.7192	252	39.7192	236	39.7192	287	39.7192	281
39.762	199	39.762	234	39.762	245	39.762	257	39.762	256	39.762	262	39.762	232	39.762	256	39.762	262
39.8048	159	39.8048	229	39.8048	245	39.8048	249	39.8048	262	39.8048	235	39.8048	230	39.8048	262	39.8048	258
39.8475	167	39.8475	241	39.8475	238	39.8475	263	39.8475	282	39.8475	269	39.8475	247	39.8475	282	39.8475	249
39.8903	157	39.8903	204	39.8903	231	39.8903	217	39.8903	266	39.8903	255	39.8903	258	39.8903	266	39.8903	278
39.933	144	39.933	203	39.933	237	39.933	235	39.933	236	39.933	266	39.933	265	39.933	236	39.933	275
39.9758	162	39.9758	203	39.9758	231	39.9758	236	39.9758	283	39.9758	283	39.9758	258	39.9758	283	39.9758	267
40.0186	190	40.0186	218	40.0186	234	40.0186	270	40.0186	235	40.0186	280	40.0186	220	40.0186	235	40.0186	288
40.0613	206	40.0613	231	40.0613	236	40.0613	235	40.0613	294	40.0613	215	40.0613	254	40.0613	294	40.0613	266
40.1041	236	40.1041	227	40.1041	209	40.1041	288	40.1041	250	40.1041	224	40.1041	242	40.1041	250	40.1041	264
40.1469	250	40.1469	216	40.1469	247	40.1469	243	40.1469	264	40.1469	274	40.1469	264	40.1469	264	40.1469	274
40.1896	329	40.1896	267	40.1896	242	40.1896	217	40.1896	247	40.1896	272	40.1896	222	40.1896	247	40.1896	240
40.2324	386	40.2324	341	40.2324	259	40.2324	232	40.2324	248	40.2324	270	40.2324	244	40.2324	248	40.2324	254
40.2751	477	40.2751	395	40.2751	250	40.2751	275	40.2751	282	40.2751	263	40.2751	238	40.2751	282	40.2751	252
40.3179	554	40.3179	477	40.3179	293	40.3179	241	40.3179	271	40.3179	263	40.3179	236	40.3179	271	40.3179	268
40.3607	432	40.3607	437	40.3607	256	40.3607	241	40.3607	258	40.3607	240	40.3607	248	40.3607	258	40.3607	248
40.4034	347	40.4034	398	40.4034	269	40.4034	237	40.4034	278	40.4034	242	40.4034	249	40.4034	278	40.4034	256
40.4462	247	40.4462	350	40.4462	265	40.4462	252	40.4462	227	40.4462	259	40.4462	250	40.4462	227	40.4462	263
40.4889	223	40.4889	317	40.4889	248	40.4889	216	40.4889	253	40.4889	255	40.4889	244	40.4889	253	40.4889	253
40.5317	186	40.5317	227	40.5317	230	40.5317	239	40.5317	259	40.5317	234	40.5317	248	40.5317	259	40.5317	268
40.5745	158	40.5745	213	40.5745	247	40.5745	246	40.5745	252	40.5745	228	40.5745	232	40.5745	252	40.5745	281
40.6172	173	40.6172	211	40.6172	241	40.6172	237	40.6172	262	40.6172	249	40.6172	272	40.6172	262	40.6172	258
40.66	186	40.66	199	40.66	258	40.66	261	40.66	247	40.66	266	40.66	237	40.66	247	40.66	273
40.7027	179	40.7027	189	40.7027	216	40.7027	240	40.7027	261	40.7027	256	40.7027	261	40.7027	261	40.7027	254
40.7455	176	40.7455	193	40.7455	231	40.7455	207	40.7455	277	40.7455	265	40.7455	231	40.7455	277	40.7455	270
40.7883	188	40.7883	179	40.7883	193	40.7883	203	40.7883	272	40.7883	217	40.7883	262	40.7883	272	40.7883	269
40.831	210	40.831	184	40.831	232	40.831	240	40.831	260	40.831	237	40.831	247	40.831	260	40.831	244
40.8738	197	40.8738	228	40.8738	254	40.8738	235	40.8738	277	40.8738	292	40.8738	248	40.8738	277	40.8738	264
40.9166	197	40.9166	219	40.9166	267	40.9166	243	40.9166	251	40.9166	252	40.9166	254	40.9166	251	40.9166	251
40.9593	175	40.9593	240	40.9593	228	40.9593	229	40.9593	284	40.9593	249	40.9593	260	40.9593	284	40.9593	288
41.0021	209	41.0021	237	41.0021	236	41.0021	237	41.0021	266	41.0021	281	41.0021	292	41.0021	266	41.0021	248
41.0448	193	41.0448	235	41.0448	218	41.0448	242	41.0448	258	41.0448	253	41.0448	278	41.0448	258	41.0448	273
41.0876	214	41.0876	188	41.0876	236	41.0876	227	41.0876	255	41.0876	242	41.0876	268	41.0876	255	41.0876	286
41.1304	234	41.1304	203	41.1304	213	41.1304	237	41.1304	283	41.1304	256	41.1304	292	41.1304	283	41.1304	275
41.1731	223	41.1731	208	41.1731	248	41.1731	243	41.1731	263	41.1731	260	41.1731	231	41.1731	263	41.1731	286
41.2159	190	41.2159	193	41.2159	258	41.2159	246	41.2159	296	41.2159	243	41.2159	237	41.2159	296	41.2159	233
41.2586	194	41.2586	190	41.2586	227	41.2586	251	41.2586	255	41.2586	271	41.2586	240	41.2586	255	41.2586	249
41.3014	161	41.3014	200	41.3014	225	41.3014	215	41.3014	280	41.3014	242	41.3014	239	41.3014	280	41.3014	232
41.3442	148	41.3442	202	41.3442	239	41.3442	249	41.3442	213	41.3442	271	41.3442	214	41.3442	213	41.3442	264
41.3869	135	41.3869	190	41.3869	220	41.3869	247	41.3869	262	41.3869	251	41.3869	246	41.3869	262	41.3869	259
41.4297	177	41.4297	217	41.4297	258	41.4297	249	41.4297	277	41.4297	263	41.4297	262	41.4297	277	41.4297	265
41.4725	159	41.4725	180	41.4725	244	41.4725	258	41.4725	273	41.4725	253	41.4725	235	41.4725	273	41.4725	259
41.5152	154	41.5152	209	41.5152	260	41.5152	234	41.5152	246	41.5152	253	41.5152	249	41.5152	246	41.5152	276
41.558	141	41.558	192	41.558	232	41.558	250	41.558	277	41.558	226	41.558	259	41.558	277	41.558	255
41.6007	147	41.6007	210	41.6007	244	41.6007	231	41.6007	264	41.6007	263	41.6007	248	41.6007	264	41.6007	261
41.6435	149	41.6435	200	41.6435	268	41.6435	214	41.6435	247	41.6435	226	41.6435	219	41.6435	247	41.6435	273
41.6863	154	41.6863	210	41.6863	250	41.6863	248	41.6863	258	41.6863	265	41.6863	245	41.6863	258	41.6863	259
41.729	137	41.729	204	41.729	240	41.729	254	41.729	261	41.729	232	41.729	259	41.729	261	41.729	248
41.7718	138	41.7718	217	41.7718	242	41.7718	237	41.7718	251	41.7718	264	41.7718	250	41.7718	251	41.7718	290
41.8145	145	41.8145	178	41.8145	234	41.8145	239	41.8145	266	41.8145	256	41.8145	247	41.8145	266	41.8145	274
41.8573	130	41.8573	208	41.8573	258	41.8573	227	41.8573	273	41.8573	251	41.8573	278	41.8573	273	41.8573	284
41.9001	183	41.9001	201	41.9001	229	41.9001	214	41.9001	267	41.9001	238	41.9001	249	41.9001	267	41.9001	243
41.9428	163	41.9428	210	41.9428	237	41.9428	256	41.9428	219	41.9428	240	41.9428	263	41.9428	219	41.9428	248
41.9856	148	41.9856	218	41.9856	242	41.9856	232	41.9856	233	41.9856	284	41.9856	232	41.9856	233	41.9856	246
42.0284	148	42.0284	194	42.0284	229	42.0284	232	42.0284	249	42.0284	247	42.0284	275	42.0284	249	42.0284	270
42.0711	169	42.0711	244	42.0711	206	42.0711	228	42.0711	288	42.0711	255	42.0711	280	42.0711	288	42.0711	258
42.1139	207	42.1139	205	42.1139	270	42.1139	243	42.1139	259	42.1139	267	42.1139	277	42.1139	259	42.1139	224
42.1566	191	42.1566	219	42.1566	226	42.1566	238	42.1566	242	42.1566	266	42.1566	249	42.1566	242	42.1566	262
42.1994	252	42.1994	220	42.1994	241	42.1994	230	42.1994	263	42.1994	245	42.1994	231	42.1994	263	42.1994	259
42.2422	263	42.2422	265	42.2422	245	42.2422	240	42.2422	268	42.2422	246	42.2422	228	42.2422	268	42.2422	280
42.2849	344	42.2849	295	42.2849	254	42.2849	257	42.2849	240	42.2849	257	42.2849	245	42.2849	240	42.2849	237
42.3277	389	42.3277	351	42.3277	244	42.3277	252	42.3277	230	42.3277	280	42.3277	266	42.3277	230	42.3277	262
42.3704	480	42.3704	381	42.3704	273	42.3704	249	42.3704	241	42.3704	239	42.3704	264	42.3704	241	42.3704	267
42.4132	542	42.4132	464	42.4132	262	42.4132	270	42.4132	250	42.4132	274	42.4132	245	42.4132	250	42.4132	287
42.456	632	42.456	461	42.456	290	42.456	231	42.456	238	42.456	291	42.456	276	42.456	238	42.456	276
42.4987	598	42.4987	583	42.4987	248	42.4987	240	42.4987	268	42.4987	233	42.4987	279	42.4987	268	42.4987	242
42.5415	476	42.5415	554	42.5415	297	42.5415	237	42.5415	256	42.5415	266	42.5415	251	42.5415	256	42.5415	252
42.5842	345	42.5842	422	42.5842	257	42.5842	217	42.5842	259	42.5842	230	42.5842	248	42.5842	259	42.5842	238
42.627	285	42.627	372	42.627	273	42.627	249	42.627	253	42.627	240	42.627	246	42.627	253	42.627	245
42.6698	205	42.6698	311	42.6698	258	42.6698	248	42.6698	280	42.6698	265	42.6698	242	42.6698	280	42.6698	238
42.7125	179	42.7125	280	42.7125	250	42.7125	243	42.7125	240	42.7125	255	42.7125	246	42.7125	240	42.7125	266
42.7553	178	42.7553	231	42.7553	275	42.7553	254	42.7553	277	42.7553	245	42.7553	241	42.7553	277	42.7553	251
42.7981	153	42.7981	208	42.7981	260	42.7981	234	42.7981	249	42.7981	251	42.7981	251	42.7981	249	42.7981	249
42.8408	172	42.8408	208	42.8408	243	42.8408	243	42.8408	266	42.8408	207	42.8408	253	42.8408	266	42.8408	289
42.8836	153	42.8836	193	42.8836	211	42.8836	249	42.8836	297	42.8836	245	42.8836	268	42.8836	297	42.8836	236
42.9263	151	42.9263	181	42.9263	237	42.9263	230	42.9263	255	42.9263	265	42.9263	246	42.9263	255	42.9263	286
42.9691	159	42.9691	219	42.9691	233	42.9691	213	42.9691	252	42.9691	265	42.9691	251	42.9691	252	42.9691	288
43.0119	160	43.0119	186	43.0119	252	43.0119	222	43.0119	269	43.0119	275	43.0119	240	43.0119	269	43.0119	261
43.0546	161	43.0546	192	43.0546	231	43.0546	228	43.0546	245	43.0546	241	43.0546	243	43.0546	245	43.0546	260
43.0974	164	43.0974	192	43.0974	242	43.0974	235	43.0974	254	43.0974	268	43.0974	232	43.0974	254	43.0974	274
43.1401	154	43.1401	199	43.1401	205	43.1401	257	43.1401	255	43.1401	240	43.1401	228	43.1401	255	43.1401	259
43.1829	156	43.1829	209	43.1829	222	43.1829	219	43.1829	263	43.1829	240	43.1829	231	43.1829	263	43.1829	250
43.2257	171	43.2257	183	43.2257	236	43.2257	216	43.2257	258	43.2257	258	43.2257	276	43.2257	258	43.2257	251
43.2684	148	43.2684	195	43.2684	227	43.2684	224	43.2684	270	43.2684	260	43.2684	239	43.2684	270	43.2684	286
43.3112	142	43.3112	188	43.3112	217	43.3112	233	43.3112	253	43.3112	241	43.3112	252	43.3112	253	43.3112	274
43.354	143	43.354	210	43.354	271	43.354	241	43.354	233	43.354	247	43.354	262	43.354	233	43.354	262
43.3967	156	43.3967	189	43.3967	230	43.3967	253	43.3967	232	43.3967	233	43.3967	246	43.3967	232	43.3967	260
43.4395	148	43.4395	195	43.4395	223	43.4395	275	43.4395	251	43.4395	249	43.4395	239	43.4395	251	43.4395	247
43.4822	141	43.4822	190	43.4822	235	43.4822	286	43.4822	257	43.4822	255	43.4822	239	43.4822	257	43.4822	264
43.525	140	43.525	195	43.525	222	43.525	248	43.525	273	43.525	276	43.525	247	43.525	273	43.525	255
43.5678	159	43.5678	234	43.5678	241	43.5678	245	43.5678	248	43.5678	240	43.5678	231	43.5678	248	43.5678	252
43.6105	143	43.6105	207	43.6105	236	43.6105	215	43.6105	267	43.6105	220	43.6105	228	43.6105	267	43.6105	256
43.6533	151	43.6533	231	43.6533	228	43.6533	261	43.6533	243	43.6533	251	43.6533	254	43.6533	243	43.6533	271
43.696	138	43.696	217	43.696	241	43.696	227	43.696	225	43.696	244	43.696	259	43.696	225	43.696	261
43.7388	147	43.7388	216	43.7388	223	43.7388	237	43.7388	277	43.7388	251	43.7388	249	43.7388	277	43.7388	262
43.7816	146	43.7816	213	43.7816	210	43.7816	231	43.7816	245	43.7816	281	43.7816	235	43.7816	245	43.7816	263
43.8243	134	43.8243	188	43.8243	239	43.8243	222	43.8243	251	43.8243	274	43.8243	233	43.8243	251	43.8243	279
43.8671	122	43.8671	187	43.8671	229	43.8671	230	43.8671	284	43.8671	229	43.8671	237	43.8671	284	43.8671	260
43.9099	142	43.9099	181	43.9099	256	43.9099	218	43.9099	254	43.9099	244	43.9099	241	43.9099	254	43.9099	249
43.9526	147	43.9526	189	43.9526	254	43.9526	200	43.9526	231	43.9526	251	43.9526	216	43.9526	231	43.9526	241
43.9954	143	43.9954	198	43.9954	222	43.9954	234	43.9954	255	43.9954	241	43.9954	217	43.9954	255	43.9954	260
44.0381	158	44.0381	190	44.0381	240	44.0381	227	44.0381	273	44.0381	214	44.0381	228	44.0381	273	44.0381	270
44.0809	147	44.0809	189	44.0809	252	44.0809	233	44.0809	248	44.0809	254	44.0809	257	44.0809	248	44.0809	278
44.1237	141	44.1237	199	44.1237	237	44.1237	257	44.1237	238	44.1237	243	44.1237	257	44.1237	238	44.1237	231
44.1664	137	44.1664	185	44.1664	235	44.1664	222	44.1664	251	44.1664	262	44.1664	240	44.1664	251	44.1664	258
44.2092	160	44.2092	165	44.2092	227	44.2092	216	44.2092	276	44.2092	248	44.2092	238	44.2092	276	44.2092	233
44.2519	174	44.2519	216	44.2519	238	44.2519	259	44.2519	275	44.2519	228	44.2519	239	44.2519	275	44.2519	258
44.2947	168	44.2947	172	44.2947	216	44.2947	229	44.2947	236	44.2947	258	44.2947	251	44.2947	236	44.2947	250
44.3375	196	44.3375	208	44.3375	218	44.3375	222	44.3375	251	44.3375	235	44.3375	242	44.3375	251	44.3375	261
44.3802	173	44.3802	205	44.3802	273	44.3802	223	44.3802	250	44.3802	238	44.3802	251	44.3802	250	44.3802	280
44.423	192	44.423	177	44.423	209	44.423	237	44.423	259	44.423	246	44.423	261	44.423	259	44.423	255
44.4657	199	44.4657	169	44.4657	229	44.4657	225	44.4657	221	44.4657	246	44.4657	213	44.4657	221	44.4657	279
44.5085	238	44.5085	184	44.5085	256	44.5085	220	44.5085	262	44.5085	254	44.5085	249	44.5085	262	44.5085	249
44.5513	224	44.5513	178	44.5513	258	44.5513	218	44.5513	257	44.5513	245	44.5513	217	44.5513	257	44.5513	238
44.594	222	44.594	216	44.594	215	44.594	231	44.594	238	44.594	262	44.594	244	44.594	238	44.594	247
44.6368	232	44.6368	179	44.6368	246	44.6368	219	44.6368	262	44.6368	241	44.6368	236	44.6368	262	44.6368	238
44.6796	230	44.6796	186	44.6796	214	44.6796	249	44.6796	258	44.6796	249	44.6796	217	44.6796	258	44.6796	245
44.7223	214	44.7223	185	44.7223	258	44.7223	239	44.7223	264	44.7223	255	44.7223	275	44.7223	264	44.7223	255
44.7651	206	44.7651	202	44.7651	209	44.7651	212	44.7651	250	44.7651	248	44.7651	243	44.7651	250	44.7651	256
44.8078	202	44.8078	185	44.8078	229	44.8078	227	44.8078	250	44.8078	263	44.8078	241	44.8078	250	44.8078	223
44.8506	164	44.8506	179	44.8506	225	44.8506	233	44.8506	258	44.8506	227	44.8506	224	44.8506	258	44.8506	237
44.8934	168	44.8934	210	44.8934	228	44.8934	240	44.8934	248	44.8934	237	44.8934	235	44.8934	248	44.8934	227
44.9361	135	44.9361	192	44.9361	222	44.9361	227	44.9361	262	44.9361	235	44.9361	242	44.9361	262	44.9361	275
44.9789	150	44.9789	185	44.9789	215	44.9789	228	44.9789	229	44.9789	228	44.9789	262	44.9789	229	44.9789	264
45.0216	162	45.0216	197	45.0216	219	45.0216	215	45.0216	262	45.0216	214	45.0216	246	45.0216	262	45.0216	219
45.0644	138	45.0644	208	45.0644	229	45.0644	227	45.0644	256	45.0644	209	45.0644	227	45.0644	256	45.0644	256
45.1072	138	45.1072	178	45.1072	205	45.1072	215	45.1072	250	45.1072	235	45.1072	247	45.1072	250	45.1072	240
45.1499	146	45.1499	182	45.1499	230	45.1499	204	45.1499	262	45.1499	240	45.1499	261	45.1499	262	45.1499	202
45.1927	142	45.1927	203	45.1927	230	45.1927	208	45.1927	269	45.1927	262	45.1927	243	45.1927	269	45.1927	235
45.2355	144	45.2355	180	45.2355	215	45.2355	213	45.2355	246	45.2355	222	45.2355	211	45.2355	246	45.2355	245
45.2782	143	45.2782	178	45.2782	218	45.2782	203	45.2782	232	45.2782	236	45.2782	196	45.2782	232	45.2782	241
45.321	152	45.321	186	45.321	224	45.321	214	45.321	244	45.321	264	45.321	214	45.321	244	45.321	250
45.3637	146	45.3637	209	45.3637	231	45.3637	213	45.3637	239	45.3637	237	45.3637	233	45.3637	239	45.3637	250
45.4065	136	45.4065	202	45.4065	219	45.4065	219	45.4065	239	45.4065	248	45.4065	241	45.4065	239	45.4065	245
45.4493	165	45.4493	190	45.4493	195	45.4493	208	45.4493	257	45.4493	246	45.4493	221	45.4493	257	45.4493	232
45.492	149	45.492	199	45.492	233	45.492	254	45.492	267	45.492	258	45.492	239	45.492	267	45.492	215
45.5348	194	45.5348	211	45.5348	212	45.5348	228	45.5348	221	45.5348	250	45.5348	233	45.5348	221	45.5348	197
45.5775	210	45.5775	183	45.5775	197	45.5775	240	45.5775	222	45.5775	244	45.5775	229	45.5775	222	45.5775	231
45.6203	271	45.6203	236	45.6203	191	45.6203	239	45.6203	243	45.6203	220	45.6203	219	45.6203	243	45.6203	226
45.6631	295	45.6631	280	45.6631	227	45.6631	204	45.6631	247	45.6631	234	45.6631	228	45.6631	247	45.6631	247
45.7058	375	45.7058	288	45.7058	220	45.7058	240	45.7058	235	45.7058	235	45.7058	206	45.7058	235	45.7058	225
45.7486	440	45.7486	329	45.7486	271	45.7486	223	45.7486	247	45.7486	239	45.7486	258	45.7486	247	45.7486	247
45.7914	523	45.7914	375	45.7914	230	45.7914	248	45.7914	259	45.7914	275	45.7914	232	45.7914	259	45.7914	215
45.8341	508	45.8341	406	45.8341	219	45.8341	226	45.8341	248	45.8341	251	45.8341	221	45.8341	248	45.8341	239
45.8769	428	45.8769	382	45.8769	232	45.8769	220	45.8769	253	45.8769	227	45.8769	231	45.8769	253	45.8769	232
45.9196	328	45.9196	302	45.9196	254	45.9196	208	45.9196	252	45.9196	236	45.9196	250	45.9196	252	45.9196	260
45.9624	294	45.9624	288	45.9624	249	45.9624	218	45.9624	249	45.9624	222	45.9624	227	45.9624	249	45.9624	216
46.0052	192	46.0052	242	46.0052	233	46.0052	199	46.0052	253	46.0052	248	46.0052	242	46.0052	253	46.0052	225
46.0479	153	46.0479	198	46.0479	203	46.0479	231	46.0479	226	46.0479	257	46.0479	224	46.0479	226	46.0479	230
46.0907	133	46.0907	172	46.0907	238	46.0907	185	46.0907	229	46.0907	224	46.0907	228	46.0907	229	46.0907	229
46.1334	152	46.1334	175	46.1334	232	46.1334	242	46.1334	246	46.1334	246	46.1334	216	46.1334	246	46.1334	242
46.1762	150	46.1762	172	46.1762	228	46.1762	221	46.1762	236	46.1762	226	46.1762	218	46.1762	236	46.1762	238
46.219	154	46.219	198	46.219	253	46.219	205	46.219	235	46.219	228	46.219	208	46.219	235	46.219	221
46.2617	144	46.2617	166	46.2617	224	46.2617	224	46.2617	248	46.2617	227	46.2617	221	46.2617	248	46.2617	230
46.3045	130	46.3045	162	46.3045	204	46.3045	188	46.3045	219	46.3045	232	46.3045	242	46.3045	219	46.3045	242
46.3472	147	46.3472	193	46.3472	195	46.3472	210	46.3472	222	46.3472	225	46.3472	236	46.3472	222	46.3472	248
46.39	133	46.39	170	46.39	178	46.39	226	46.39	224	46.39	236	46.39	252	46.39	224	46.39	231
46.4328	125	46.4328	188	46.4328	213	46.4328	213	46.4328	226	46.4328	226	46.4328	233	46.4328	226	46.4328	236
46.4755	124	46.4755	189	46.4755	194	46.4755	233	46.4755	235	46.4755	241	46.4755	231	46.4755	235	46.4755	235
46.5183	114	46.5183	158	46.5183	212	46.5183	211	46.5183	193	46.5183	216	46.5183	224	46.5183	193	46.5183	248
46.5611	137	46.5611	179	46.5611	209	46.5611	190	46.5611	217	46.5611	247	46.5611	253	46.5611	217	46.5611	217
46.6038	154	46.6038	172	46.6038	207	46.6038	209	46.6038	229	46.6038	241	46.6038	194	46.6038	229	46.6038	234
46.6466	120	46.6466	185	46.6466	205	46.6466	240	46.6466	250	46.6466	236	46.6466	203	46.6466	250	46.6466	217
46.6893	124	46.6893	201	46.6893	213	46.6893	189	46.6893	231	46.6893	228	46.6893	225	46.6893	231	46.6893	242
46.7321	121	46.7321	195	46.7321	229	46.7321	215	46.7321	242	46.7321	230	46.7321	249	46.7321	242	46.7321	264
46.7749	139	46.7749	152	46.7749	220	46.7749	226	46.7749	238	46.7749	252	46.7749	233	46.7749	238	46.7749	204
46.8176	135	46.8176	174	46.8176	261	46.8176	213	46.8176	229	46.8176	250	46.8176	218	46.8176	229	46.8176	209
46.8604	115	46.8604	194	46.8604	247	46.8604	237	46.8604	249	46.8604	212	46.8604	233	46.8604	249	46.8604	261
46.9031	124	46.9031	178	46.9031	237	46.9031	218	46.9031	239	46.9031	210	46.9031	228	46.9031	239	46.9031	239
46.9459	129	46.9459	181	46.9459	206	46.9459	200	46.9459	253	46.9459	243	46.9459	205	46.9459	253	46.9459	250
46.9887	151	46.9887	176	46.9887	230	46.9887	226	46.9887	228	46.9887	240	46.9887	191	46.9887	228	46.9887	238
47.0314	141	47.0314	197	47.0314	253	47.0314	220	47.0314	220	47.0314	188	47.0314	216	47.0314	220	47.0314	218
47.0742	113	47.0742	164	47.0742	220	47.0742	237	47.0742	204	47.0742	231	47.0742	218	47.0742	204	47.0742	243
47.117	139	47.117	198	47.117	271	47.117	220	47.117	221	47.117	236	47.117	222	47.117	221	47.117	221
47.1597	150	47.1597	175	47.1597	221	47.1597	223	47.1597	280	47.1597	229	47.1597	204	47.1597	280	47.1597	217
47.2025	142	47.2025	155	47.2025	224	47.2025	216	47.2025	239	47.2025	215	47.2025	226	47.2025	239	47.2025	229
47.2452	134	47.2452	169	47.2452	226	47.2452	210	47.2452	207	47.2452	232	47.2452	210	47.2452	207	47.2452	218
47.288	145	47.288	178	47.288	212	47.288	201	47.288	226	47.288	229	47.288	215	47.288	226	47.288	234
47.3308	138	47.3308	153	47.3308	201	47.3308	223	47.3308	233	47.3308	238	47.3308	220	47.3308	233	47.3308	251
47.3735	151	47.3735	180	47.3735	205	47.3735	211	47.3735	218	47.3735	236	47.3735	227	47.3735	218	47.3735	228
47.4163	131	47.4163	175	47.4163	200	47.4163	222	47.4163	206	47.4163	210	47.4163	215	47.4163	206	47.4163	186
47.459	121	47.459	169	47.459	217	47.459	213	47.459	205	47.459	197	47.459	214	47.459	205	47.459	237
47.5018	145	47.5018	183	47.5018	200	47.5018	215	47.5018	234	47.5018	220	47.5018	218	47.5018	234	47.5018	231
47.5446	139	47.5446	191	47.5446	188	47.5446	220	47.5446	223	47.5446	218	47.5446	236	47.5446	223	47.5446	228
47.5873	125	47.5873	177	47.5873	194	47.5873	202	47.5873	260	47.5873	234	47.5873	217	47.5873	260	47.5873	218
47.6301	135	47.6301	182	47.6301	201	47.6301	218	47.6301	226	47.6301	221	47.6301	228	47.6301	226	47.6301	225
47.6728	119	47.6728	172	47.6728	223	47.6728	194	47.6728	234	47.6728	232	47.6728	200	47.6728	234	47.6728	224
47.7156	157	47.7156	174	47.7156	221	47.7156	186	47.7156	216	47.7156	231	47.7156	242	47.7156	216	47.7156	237
47.7584	110	47.7584	169	47.7584	218	47.7584	218	47.7584	239	47.7584	214	47.7584	225	47.7584	239	47.7584	252
47.8011	108	47.8011	150	47.8011	186	47.8011	211	47.8011	222	47.8011	237	47.8011	209	47.8011	222	47.8011	224
47.8439	120	47.8439	158	47.8439	192	47.8439	219	47.8439	231	47.8439	210	47.8439	215	47.8439	231	47.8439	245
47.8867	128	47.8867	181	47.8867	198	47.8867	193	47.8867	245	47.8867	239	47.8867	239	47.8867	245	47.8867	200
47.9294	124	47.9294	176	47.9294	183	47.9294	196	47.9294	233	47.9294	237	47.9294	219	47.9294	233	47.9294	242
47.9722	145	47.9722	160	47.9722	202	47.9722	187	47.9722	228	47.9722	210	47.9722	207	47.9722	228	47.9722	214
48.0149	165	48.0149	183	48.0149	200	48.0149	211	48.0149	216	48.0149	234	48.0149	212	48.0149	216	48.0149	231
48.0577	135	48.0577	162	48.0577	193	48.0577	214	48.0577	242	48.0577	224	48.0577	222	48.0577	242	48.0577	228
48.1005	113	48.1005	170	48.1005	214	48.1005	200	48.1005	225	48.1005	212	48.1005	220	48.1005	225	48.1005	209
48.1432	117	48.1432	145	48.1432	220	48.1432	213	48.1432	195	48.1432	205	48.1432	217	48.1432	195	48.1432	245
48.186	137	48.186	168	48.186	218	48.186	217	48.186	227	48.186	229	48.186	216	48.186	227	48.186	200
48.2287	123	48.2287	168	48.2287	225	48.2287	208	48.2287	201	48.2287	201	48.2287	211	48.2287	201	48.2287	208
48.2715	165	48.2715	196	48.2715	231	48.2715	224	48.2715	221	48.2715	213	48.2715	242	48.2715	221	48.2715	234
48.3143	118	48.3143	158	48.3143	207	48.3143	194	48.3143	228	48.3143	227	48.3143	210	48.3143	228	48.3143	246
48.357	153	48.357	161	48.357	232	48.357	198	48.357	223	48.357	225	48.357	199	48.357	223	48.357	229
48.3998	134	48.3998	200	48.3998	203	48.3998	209	48.3998	210	48.3998	211	48.3998	202	48.3998	210	48.3998	239
48.4426	128	48.4426	176	48.4426	217	48.4426	209	48.4426	222	48.4426	225	48.4426	209	48.4426	222	48.4426	198
48.4853	135	48.4853	160	48.4853	211	48.4853	209	48.4853	218	48.4853	236	48.4853	183	48.4853	218	48.4853	204
48.5281	127	48.5281	184	48.5281	242	48.5281	210	48.5281	230	48.5281	220	48.5281	188	48.5281	230	48.5281	242
48.5708	113	48.5708	195	48.5708	216	48.5708	193	48.5708	222	48.5708	220	48.5708	185	48.5708	222	48.5708	221
48.6136	140	48.6136	176	48.6136	205	48.6136	202	48.6136	219	48.6136	197	48.6136	196	48.6136	219	48.6136	219
48.6564	142	48.6564	179	48.6564	224	48.6564	194	48.6564	220	48.6564	216	48.6564	226	48.6564	220	48.6564	227
48.6991	127	48.6991	195	48.6991	196	48.6991	193	48.6991	224	48.6991	189	48.6991	221	48.6991	224	48.6991	203
48.7419	133	48.7419	173	48.7419	216	48.7419	202	48.7419	207	48.7419	224	48.7419	196	48.7419	207	48.7419	197
48.7846	144	48.7846	178	48.7846	212	48.7846	209	48.7846	218	48.7846	196	48.7846	192	48.7846	218	48.7846	209
48.8274	129	48.8274	160	48.8274	185	48.8274	200	48.8274	227	48.8274	234	48.8274	205	48.8274	227	48.8274	204
48.8702	126	48.8702	184	48.8702	198	48.8702	218	48.8702	219	48.8702	211	48.8702	214	48.8702	219	48.8702	190
48.9129	121	48.9129	161	48.9129	200	48.9129	202	48.9129	256	48.9129	225	48.9129	201	48.9129	256	48.9129	210
48.9557	153	48.9557	197	48.9557	197	48.9557	218	48.9557	235	48.9557	190	48.9557	199	48.9557	235	48.9557	235
48.9985	140	48.9985	170	48.9985	197	48.9985	216	48.9985	210	48.9985	198	48.9985	216	48.9985	210	48.9985	189
49.0412	120	49.0412	178	49.0412	198	49.0412	209	49.0412	228	49.0412	236	49.0412	216	49.0412	228	49.0412	212
49.084	150	49.084	174	49.084	192	49.084	199	49.084	190	49.084	211	49.084	203	49.084	190	49.084	232
49.1267	125	49.1267	182	49.1267	195	49.1267	223	49.1267	244	49.1267	222	49.1267	199	49.1267	244	49.1267	201
49.1695	154	49.1695	171	49.1695	215	49.1695	217	49.1695	211	49.1695	228	49.1695	205	49.1695	211	49.1695	227
49.2123	148	49.2123	153	49.2123	183	49.2123	216	49.2123	229	49.2123	217	49.2123	190	49.2123	229	49.2123	207
49.255	141	49.255	145	49.255	191	49.255	211	49.255	217	49.255	248	49.255	221	49.255	217	49.255	213
49.2978	114	49.2978	170	49.2978	192	49.2978	222	49.2978	202	49.2978	218	49.2978	200	49.2978	202	49.2978	219
49.3405	163	49.3405	178	49.3405	179	49.3405	191	49.3405	224	49.3405	208	49.3405	212	49.3405	224	49.3405	207
49.3833	159	49.3833	168	49.3833	168	49.3833	209	49.3833	232	49.3833	210	49.3833	211	49.3833	232	49.3833	217
49.4261	170	49.4261	199	49.4261	203	49.4261	188	49.4261	201	49.4261	212	49.4261	202	49.4261	201	49.4261	222
49.4688	172	49.4688	204	49.4688	195	49.4688	201	49.4688	199	49.4688	218	49.4688	214	49.4688	199	49.4688	216
49.5116	194	49.5116	213	49.5116	203	49.5116	196	49.5116	204	49.5116	213	49.5116	200	49.5116	204	49.5116	227
49.5543	183	49.5543	228	49.5543	188	49.5543	223	49.5543	221	49.5543	229	49.5543	257	49.5543	221	49.5543	204
49.5971	229	49.5971	229	49.5971	198	49.5971	216	49.5971	210	49.5971	232	49.5971	209	49.5971	210	49.5971	226
49.6399	196	49.6399	216	49.6399	201	49.6399	183	49.6399	225	49.6399	198	49.6399	245	49.6399	225	49.6399	208
49.6826	270	49.6826	243	49.6826	205	49.6826	201	49.6826	189	49.6826	245	49.6826	209	49.6826	189	49.6826	225
49.7254	257	49.7254	240	49.7254	210	49.7254	202	49.7254	242	49.7254	226	49.7254	196	49.7254	242	49.7254	222
49.7682	285	49.7682	185	49.7682	201	49.7682	205	49.7682	229	49.7682	201	49.7682	237	49.7682	229	49.7682	190
49.8109	284	49.8109	207	49.8109	204	49.8109	208	49.8109	232	49.8109	207	49.8109	218	49.8109	232	49.8109	210
49.8537	311	49.8537	201	49.8537	197	49.8537	202	49.8537	202	49.8537	195	49.8537	183	49.8537	202	49.8537	201
49.8964	397	49.8964	228	49.8964	225	49.8964	218	49.8964	214	49.8964	184	49.8964	205	49.8964	214	49.8964	205
49.9392	431	49.9392	272	49.9392	238	49.9392	195	49.9392	206	49.9392	232	49.9392	201	49.9392	206	49.9392	219
49.982	560	49.982	338	49.982	244	49.982	174	49.982	205	49.982	224	49.982	208	49.982	205	49.982	194
50.0247	682	50.0247	414	50.0247	208	50.0247	190	50.0247	233	50.0247	222	50.0247	193	50.0247	233	50.0247	216
50.0675	877	50.0675	536	50.0675	262	50.0675	191	50.0675	205	50.0675	229	50.0675	223	50.0675	205	50.0675	222
50.1102	1032	50.1102	652	50.1102	265	50.1102	176	50.1102	198	50.1102	234	50.1102	209	50.1102	198	50.1102	194
50.153	1174	50.153	848	50.153	331	50.153	212	50.153	237	50.153	260	50.153	206	50.153	237	50.153	222
50.1958	971	50.1958	920	50.1958	282	50.1958	202	50.1958	212	50.1958	225	50.1958	204	50.1958	212	50.1958	215
50.2385	798	50.2385	807	50.2385	250	50.2385	202	50.2385	185	50.2385	278	50.2385	212	50.2385	185	50.2385	202
50.2813	670	50.2813	647	50.2813	276	50.2813	183	50.2813	183	50.2813	229	50.2813	202	50.2813	183	50.2813	222
50.3241	505	50.3241	588	50.3241	248	50.3241	225	50.3241	228	50.3241	216	50.3241	196	50.3241	228	50.3241	193
50.3668	309	50.3668	465	50.3668	223	50.3668	207	50.3668	224	50.3668	222	50.3668	219	50.3668	224	50.3668	202
50.4096	224	50.4096	266	50.4096	222	50.4096	212	50.4096	207	50.4096	211	50.4096	224	50.4096	207	50.4096	212
50.4523	170	50.4523	205	50.4523	178	50.4523	199	50.4523	187	50.4523	221	50.4523	225	50.4523	187	50.4523	227
50.4951	168	50.4951	227	50.4951	214	50.4951	195	50.4951	218	50.4951	193	50.4951	210	50.4951	218	50.4951	197
50.5379	169	50.5379	187	50.5379	214	50.5379	176	50.5379	195	50.5379	212	50.5379	213	50.5379	195	50.5379	214
50.5806	163	50.5806	176	50.5806	215	50.5806	204	50.5806	207	50.5806	206	50.5806	209	50.5806	207	50.5806	219
50.6234	204	50.6234	170	50.6234	201	50.6234	227	50.6234	221	50.6234	194	50.6234	206	50.6234	221	50.6234	211
50.6661	178	50.6661	164	50.6661	209	50.6661	194	50.6661	217	50.6661	190	50.6661	208	50.6661	217	50.6661	227
50.7089	165	50.7089	189	50.7089	208	50.7089	190	50.7089	229	50.7089	198	50.7089	221	50.7089	229	50.7089	223
50.7517	147	50.7517	175	50.7517	219	50.7517	193	50.7517	201	50.7517	196	50.7517	224	50.7517	201	50.7517	206
50.7944	135	50.7944	191	50.7944	173	50.7944	222	50.7944	203	50.7944	200	50.7944	183	50.7944	203	50.7944	224
50.8372	158	50.8372	172	50.8372	170	50.8372	221	50.8372	214	50.8372	225	50.8372	204	50.8372	214	50.8372	224
50.88	133	50.88	167	50.88	191	50.88	184	50.88	217	50.88	182	50.88	213	50.88	217	50.88	204
50.9227	116	50.9227	166	50.9227	189	50.9227	214	50.9227	211	50.9227	220	50.9227	201	50.9227	211	50.9227	208
50.9655	127	50.9655	148	50.9655	192	50.9655	221	50.9655	221	50.9655	187	50.9655	219	50.9655	221	50.9655	210
51.0082	147	51.0082	158	51.0082	201	51.0082	197	51.0082	214	51.0082	192	51.0082	196	51.0082	214	51.0082	225
51.051	154	51.051	155	51.051	181	51.051	216	51.051	226	51.051	210	51.051	175	51.051	226	51.051	177
51.0938	144	51.0938	151	51.0938	202	51.0938	191	51.0938	202	51.0938	226	51.0938	197	51.0938	202	51.0938	216
51.1365	140	51.1365	151	51.1365	190	51.1365	215	51.1365	223	51.1365	224	51.1365	205	51.1365	223	51.1365	210
51.1793	131	51.1793	175	51.1793	190	51.1793	212	51.1793	219	51.1793	234	51.1793	199	51.1793	219	51.1793	221
51.222	131	51.222	164	51.222	207	51.222	184	51.222	216	51.222	200	51.222	193	51.222	216	51.222	210
51.2648	124	51.2648	163	51.2648	203	51.2648	214	51.2648	192	51.2648	211	51.2648	199	51.2648	192	51.2648	199
51.3076	137	51.3076	157	51.3076	160	51.3076	195	51.3076	179	51.3076	191	51.3076	191	51.3076	179	51.3076	218
51.3503	118	51.3503	177	51.3503	196	51.3503	191	51.3503	207	51.3503	193	51.3503	212	51.3503	207	51.3503	184
51.3931	133	51.3931	159	51.3931	185	51.3931	192	51.3931	212	51.3931	212	51.3931	192	51.3931	212	51.3931	187
51.4358	118	51.4358	157	51.4358	174	51.4358	182	51.4358	223	51.4358	221	51.4358	188	51.4358	223	51.4358	232
51.4786	137	51.4786	154	51.4786	211	51.4786	166	51.4786	232	51.4786	214	51.4786	189	51.4786	232	51.4786	227
51.5214	156	51.5214	155	51.5214	192	51.5214	185	51.5214	223	51.5214	188	51.5214	176	51.5214	223	51.5214	212
51.5641	135	51.5641	168	51.5641	174	51.5641	178	51.5641	220	51.5641	226	51.5641	195	51.5641	220	51.5641	242
51.6069	148	51.6069	174	51.6069	202	51.6069	218	51.6069	230	51.6069	213	51.6069	226	51.6069	230	51.6069	193
51.6497	145	51.6497	165	51.6497	170	51.6497	188	51.6497	196	51.6497	207	51.6497	201	51.6497	196	51.6497	216
51.6924	140	51.6924	140	51.6924	209	51.6924	194	51.6924	202	51.6924	214	51.6924	221	51.6924	202	51.6924	192
51.7352	125	51.7352	176	51.7352	187	51.7352	177	51.7352	214	51.7352	178	51.7352	203	51.7352	214	51.7352	192
51.7779	145	51.7779	167	51.7779	188	51.7779	186	51.7779	212	51.7779	204	51.7779	212	51.7779	212	51.7779	224
51.8207	130	51.8207	171	51.8207	183	51.8207	184	51.8207	223	51.8207	201	51.8207	213	51.8207	223	51.8207	202
51.8635	140	51.8635	162	51.8635	171	51.8635	196	51.8635	220	51.8635	212	51.8635	226	51.8635	220	51.8635	209
51.9062	141	51.9062	178	51.9062	209	51.9062	199	51.9062	215	51.9062	217	51.9062	201	51.9062	215	51.9062	202
51.949	129	51.949	146	51.949	182	51.949	194	51.949	219	51.949	194	51.949	216	51.949	219	51.949	219
51.9917	136	51.9917	178	51.9917	165	51.9917	172	51.9917	204	51.9917	198	51.9917	199	51.9917	204	51.9917	202
52.0345	118	52.0345	163	52.0345	187	52.0345	191	52.0345	182	52.0345	227	52.0345	196	52.0345	182	52.0345	217
52.0773	130	52.0773	182	52.0773	196	52.0773	208	52.0773	214	52.0773	214	52.0773	211	52.0773	214	52.0773	212
52.12	133	52.12	174	52.12	193	52.12	205	52.12	220	52.12	195	52.12	184	52.12	220	52.12	214
52.1628	135	52.1628	154	52.1628	189	52.1628	184	52.1628	212	52.1628	211	52.1628	203	52.1628	212	52.1628	229
52.2056	139	52.2056	148	52.2056	180	52.2056	204	52.2056	212	52.2056	189	52.2056	208	52.2056	212	52.2056	187
52.2483	126	52.2483	139	52.2483	200	52.2483	202	52.2483	214	52.2483	214	52.2483	169	52.2483	214	52.2483	239
52.2911	128	52.2911	174	52.2911	214	52.2911	184	52.2911	194	52.2911	206	52.2911	202	52.2911	194	52.2911	205
52.3338	125	52.3338	151	52.3338	200	52.3338	198	52.3338	204	52.3338	206	52.3338	190	52.3338	204	52.3338	191
52.3766	125	52.3766	162	52.3766	201	52.3766	215	52.3766	222	52.3766	197	52.3766	206	52.3766	222	52.3766	202
52.4194	122	52.4194	184	52.4194	180	52.4194	203	52.4194	212	52.4194	222	52.4194	175	52.4194	212	52.4194	186
52.4621	129	52.4621	157	52.4621	173	52.4621	225	52.4621	225	52.4621	211	52.4621	193	52.4621	225	52.4621	206
52.5049	117	52.5049	154	52.5049	192	52.5049	169	52.5049	199	52.5049	232	52.5049	209	52.5049	199	52.5049	204
52.5476	150	52.5476	167	52.5476	213	52.5476	188	52.5476	215	52.5476	206	52.5476	189	52.5476	215	52.5476	187
52.5904	144	52.5904	170	52.5904	174	52.5904	171	52.5904	233	52.5904	213	52.5904	211	52.5904	233	52.5904	202
52.6332	134	52.6332	156	52.6332	187	52.6332	178	52.6332	225	52.6332	211	52.6332	218	52.6332	225	52.6332	211
52.6759	131	52.6759	173	52.6759	223	52.6759	196	52.6759	187	52.6759	210	52.6759	225	52.6759	187	52.6759	179
52.7187	128	52.7187	174	52.7187	178	52.7187	175	52.7187	230	52.7187	213	52.7187	199	52.7187	230	52.7187	214
52.7615	130	52.7615	171	52.7615	202	52.7615	204	52.7615	160	52.7615	217	52.7615	208	52.7615	160	52.7615	211
52.8042	122	52.8042	161	52.8042	173	52.8042	198	52.8042	201	52.8042	217	52.8042	195	52.8042	201	52.8042	212
52.847	130	52.847	147	52.847	237	52.847	186	52.847	234	52.847	172	52.847	194	52.847	234	52.847	198
52.8897	129	52.8897	147	52.8897	206	52.8897	204	52.8897	201	52.8897	217	52.8897	203	52.8897	201	52.8897	232
52.9325	146	52.9325	153	52.9325	212	52.9325	199	52.9325	218	52.9325	205	52.9325	197	52.9325	218	52.9325	198
52.9753	137	52.9753	169	52.9753	201	52.9753	199	52.9753	205	52.9753	208	52.9753	232	52.9753	205	52.9753	214
53.018	130	53.018	169	53.018	197	53.018	185	53.018	205	53.018	224	53.018	180	53.018	205	53.018	195
53.0608	122	53.0608	151	53.0608	164	53.0608	176	53.0608	223	53.0608	200	53.0608	200	53.0608	223	53.0608	215
53.1035	117	53.1035	158	53.1035	195	53.1035	211	53.1035	242	53.1035	210	53.1035	199	53.1035	242	53.1035	228
53.1463	130	53.1463	146	53.1463	195	53.1463	201	53.1463	206	53.1463	218	53.1463	202	53.1463	206	53.1463	201
53.1891	117	53.1891	165	53.1891	206	53.1891	198	53.1891	202	53.1891	177	53.1891	201	53.1891	202	53.1891	237
53.2318	139	53.2318	171	53.2318	189	53.2318	203	53.2318	189	53.2318	181	53.2318	188	53.2318	189	53.2318	218
53.2746	131	53.2746	170	53.2746	205	53.2746	182	53.2746	202	53.2746	207	53.2746	173	53.2746	202	53.2746	210
53.3173	109	53.3173	166	53.3173	162	53.3173	203	53.3173	208	53.3173	208	53.3173	206	53.3173	208	53.3173	214
53.3601	134	53.3601	157	53.3601	177	53.3601	213	53.3601	208	53.3601	241	53.3601	187	53.3601	208	53.3601	194
53.4029	141	53.4029	170	53.4029	196	53.4029	192	53.4029	213	53.4029	189	53.4029	220	53.4029	213	53.4029	217
53.4456	121	53.4456	171	53.4456	213	53.4456	205	53.4456	217	53.4456	228	53.4456	195	53.4456	217	53.4456	204
53.4884	125	53.4884	175	53.4884	189	53.4884	209	53.4884	203	53.4884	228	53.4884	207	53.4884	203	53.4884	194
53.5312	142	53.5312	158	53.5312	208	53.5312	212	53.5312	220	53.5312	232	53.5312	194	53.5312	220	53.5312	235
53.5739	157	53.5739	149	53.5739	192	53.5739	186	53.5739	219	53.5739	221	53.5739	213	53.5739	219	53.5739	211
53.6167	144	53.6167	190	53.6167	190	53.6167	197	53.6167	196	53.6167	212	53.6167	209	53.6167	196	53.6167	212
53.6594	124	53.6594	157	53.6594	193	53.6594	192	53.6594	220	53.6594	196	53.6594	206	53.6594	220	53.6594	221
53.7022	130	53.7022	138	53.7022	175	53.7022	195	53.7022	200	53.7022	213	53.7022	203	53.7022	200	53.7022	204
53.745	140	53.745	166	53.745	204	53.745	198	53.745	221	53.745	225	53.745	209	53.745	221	53.745	207
53.7877	146	53.7877	184	53.7877	224	53.7877	173	53.7877	230	53.7877	191	53.7877	198	53.7877	230	53.7877	208
53.8305	140	53.8305	179	53.8305	205	53.8305	161	53.8305	211	53.8305	212	53.8305	193	53.8305	211	53.8305	193
53.8732	120	53.8732	168	53.8732	220	53.8732	200	53.8732	229	53.8732	194	53.8732	207	53.8732	229	53.8732	228
53.916	129	53.916	161	53.916	190	53.916	191	53.916	224	53.916	187	53.916	198	53.916	224	53.916	222
53.9588	140	53.9588	165	53.9588	180	53.9588	188	53.9588	216	53.9588	196	53.9588	211	53.9588	216	53.9588	231
54.0015	150	54.0015	171	54.0015	210	54.0015	199	54.0015	199	54.0015	177	54.0015	203	54.0015	199	54.0015	199
54.0443	129	54.0443	180	54.0443	204	54.0443	187	54.0443	218	54.0443	203	54.0443	213	54.0443	218	54.0443	207
54.0871	140	54.0871	173	54.0871	191	54.0871	190	54.0871	230	54.0871	198	54.0871	185	54.0871	230	54.0871	213
54.1298	167	54.1298	233	54.1298	204	54.1298	188	54.1298	215	54.1298	222	54.1298	207	54.1298	215	54.1298	219
54.1726	180	54.1726	228	54.1726	204	54.1726	208	54.1726	217	54.1726	206	54.1726	209	54.1726	217	54.1726	205
54.2153	170	54.2153	269	54.2153	194	54.2153	210	54.2153	240	54.2153	224	54.2153	209	54.2153	240	54.2153	237
54.2581	203	54.2581	236	54.2581	185	54.2581	181	54.2581	216	54.2581	223	54.2581	220	54.2581	216	54.2581	232
54.3009	237	54.3009	205	54.3009	205	54.3009	206	54.3009	200	54.3009	234	54.3009	234	54.3009	200	54.3009	230
54.3436	190	54.3436	211	54.3436	207	54.3436	190	54.3436	205	54.3436	222	54.3436	180	54.3436	205	54.3436	179
54.3864	244	54.3864	197	54.3864	180	54.3864	197	54.3864	227	54.3864	197	54.3864	195	54.3864	227	54.3864	213
54.4291	254	54.4291	180	54.4291	185	54.4291	182	54.4291	229	54.4291	217	54.4291	202	54.4291	229	54.4291	208
54.4719	260	54.4719	167	54.4719	183	54.4719	184	54.4719	220	54.4719	228	54.4719	256	54.4719	220	54.4719	188
54.5147	245	54.5147	176	54.5147	202	54.5147	210	54.5147	222	54.5147	224	54.5147	181	54.5147	222	54.5147	198
54.5574	244	54.5574	191	54.5574	207	54.5574	202	54.5574	225	54.5574	246	54.5574	187	54.5574	225	54.5574	191
54.6002	212	54.6002	193	54.6002	226	54.6002	215	54.6002	223	54.6002	195	54.6002	193	54.6002	223	54.6002	194
54.6429	242	54.6429	194	54.6429	184	54.6429	215	54.6429	211	54.6429	201	54.6429	207	54.6429	211	54.6429	202
54.6857	273	54.6857	193	54.6857	202	54.6857	155	54.6857	218	54.6857	219	54.6857	185	54.6857	218	54.6857	213
54.7285	289	54.7285	253	54.7285	201	54.7285	192	54.7285	213	54.7285	229	54.7285	190	54.7285	213	54.7285	228
54.7712	329	54.7712	276	54.7712	204	54.7712	204	54.7712	215	54.7712	211	54.7712	187	54.7712	215	54.7712	192
54.814	406	54.814	311	54.814	231	54.814	180	54.814	202	54.814	209	54.814	225	54.814	202	54.814	221
54.8568	546	54.8568	351	54.8568	219	54.8568	178	54.8568	200	54.8568	217	54.8568	200	54.8568	200	54.8568	197
54.8995	622	54.8995	434	54.8995	277	54.8995	199	54.8995	212	54.8995	224	54.8995	183	54.8995	212	54.8995	208
54.9423	503	54.9423	416	54.9423	246	54.9423	195	54.9423	209	54.9423	225	54.9423	195	54.9423	209	54.9423	198
54.985	392	54.985	345	54.985	224	54.985	166	54.985	204	54.985	222	54.985	204	54.985	204	54.985	231
55.0278	379	55.0278	319	55.0278	222	55.0278	179	55.0278	220	55.0278	223	55.0278	217	55.0278	220	55.0278	213
55.0706	314	55.0706	282	55.0706	244	55.0706	207	55.0706	232	55.0706	210	55.0706	199	55.0706	232	55.0706	191
55.1133	262	55.1133	245	55.1133	189	55.1133	181	55.1133	219	55.1133	215	55.1133	193	55.1133	219	55.1133	195
55.1561	229	55.1561	218	55.1561	175	55.1561	183	55.1561	210	55.1561	211	55.1561	195	55.1561	210	55.1561	228
55.1988	224	55.1988	199	55.1988	206	55.1988	189	55.1988	228	55.1988	219	55.1988	203	55.1988	228	55.1988	220
55.2416	219	55.2416	215	55.2416	211	55.2416	212	55.2416	219	55.2416	227	55.2416	200	55.2416	219	55.2416	231
55.2844	235	55.2844	211	55.2844	197	55.2844	207	55.2844	205	55.2844	205	55.2844	189	55.2844	205	55.2844	197
55.3271	298	55.3271	211	55.3271	197	55.3271	159	55.3271	197	55.3271	208	55.3271	216	55.3271	197	55.3271	198
55.3699	320	55.3699	247	55.3699	186	55.3699	198	55.3699	239	55.3699	200	55.3699	221	55.3699	239	55.3699	220
55.4127	262	55.4127	254	55.4127	228	55.4127	196	55.4127	202	55.4127	234	55.4127	206	55.4127	202	55.4127	217
55.4554	258	55.4554	208	55.4554	170	55.4554	200	55.4554	201	55.4554	207	55.4554	214	55.4554	201	55.4554	222
55.4982	242	55.4982	229	55.4982	200	55.4982	182	55.4982	218	55.4982	203	55.4982	211	55.4982	218	55.4982	194
55.5409	219	55.5409	224	55.5409	216	55.5409	217	55.5409	235	55.5409	193	55.5409	200	55.5409	235	55.5409	218
55.5837	164	55.5837	195	55.5837	214	55.5837	196	55.5837	203	55.5837	217	55.5837	205	55.5837	203	55.5837	207
55.6265	165	55.6265	173	55.6265	195	55.6265	203	55.6265	220	55.6265	201	55.6265	228	55.6265	220	55.6265	229
55.6692	143	55.6692	187	55.6692	197	55.6692	193	55.6692	234	55.6692	202	55.6692	209	55.6692	234	55.6692	215
55.712	129	55.712	153	55.712	194	55.712	208	55.712	200	55.712	188	55.712	203	55.712	200	55.712	188
55.7547	119	55.7547	152	55.7547	189	55.7547	203	55.7547	212	55.7547	221	55.7547	166	55.7547	212	55.7547	195
55.7975	127	55.7975	179	55.7975	171	55.7975	183	55.7975	227	55.7975	178	55.7975	198	55.7975	227	55.7975	213
55.8403	141	55.8403	183	55.8403	201	55.8403	188	55.8403	198	55.8403	199	55.8403	202	55.8403	198	55.8403	199
55.883	135	55.883	141	55.883	197	55.883	202	55.883	225	55.883	234	55.883	189	55.883	225	55.883	213
55.9258	122	55.9258	159	55.9258	183	55.9258	196	55.9258	229	55.9258	201	55.9258	201	55.9258	229	55.9258	201
55.9686	129	55.9686	165	55.9686	195	55.9686	181	55.9686	215	55.9686	196	55.9686	194	55.9686	215	55.9686	208
56.0113	132	56.0113	163	56.0113	180	56.0113	211	56.0113	214	56.0113	188	56.0113	218	56.0113	214	56.0113	214
56.0541	134	56.0541	165	56.0541	211	56.0541	187	56.0541	210	56.0541	171	56.0541	208	56.0541	210	56.0541	220
56.0968	121	56.0968	155	56.0968	213	56.0968	209	56.0968	223	56.0968	216	56.0968	190	56.0968	223	56.0968	195
56.1396	133	56.1396	187	56.1396	208	56.1396	195	56.1396	189	56.1396	206	56.1396	196	56.1396	189	56.1396	214
56.1824	123	56.1824	170	56.1824	195	56.1824	192	56.1824	210	56.1824	208	56.1824	186	56.1824	210	56.1824	210
56.2251	110	56.2251	174	56.2251	203	56.2251	214	56.2251	213	56.2251	204	56.2251	230	56.2251	213	56.2251	177
56.2679	127	56.2679	165	56.2679	206	56.2679	211	56.2679	188	56.2679	212	56.2679	179	56.2679	188	56.2679	199
56.3106	115	56.3106	174	56.3106	198	56.3106	211	56.3106	207	56.3106	195	56.3106	206	56.3106	207	56.3106	247
56.3534	139	56.3534	142	56.3534	181	56.3534	194	56.3534	235	56.3534	203	56.3534	208	56.3534	235	56.3534	205
56.3962	132	56.3962	161	56.3962	179	56.3962	231	56.3962	215	56.3962	199	56.3962	198	56.3962	215	56.3962	235
56.4389	116	56.4389	160	56.4389	196	56.4389	226	56.4389	221	56.4389	224	56.4389	221	56.4389	221	56.4389	208
56.4817	129	56.4817	156	56.4817	191	56.4817	200	56.4817	213	56.4817	229	56.4817	195	56.4817	213	56.4817	227
56.5244	147	56.5244	154	56.5244	189	56.5244	197	56.5244	211	56.5244	223	56.5244	216	56.5244	211	56.5244	194
56.5672	140	56.5672	150	56.5672	208	56.5672	196	56.5672	221	56.5672	201	56.5672	217	56.5672	221	56.5672	226
56.61	124	56.61	167	56.61	228	56.61	198	56.61	220	56.61	217	56.61	174	56.61	220	56.61	213
56.6527	135	56.6527	167	56.6527	203	56.6527	206	56.6527	198	56.6527	226	56.6527	194	56.6527	198	56.6527	209
56.6955	144	56.6955	169	56.6955	196	56.6955	189	56.6955	196	56.6955	213	56.6955	201	56.6955	196	56.6955	200
56.7383	140	56.7383	174	56.7383	214	56.7383	172	56.7383	223	56.7383	206	56.7383	195	56.7383	223	56.7383	202
56.781	131	56.781	198	56.781	196	56.781	189	56.781	220	56.781	218	56.781	193	56.781	220	56.781	207
56.8238	130	56.8238	168	56.8238	229	56.8238	205	56.8238	191	56.8238	221	56.8238	199	56.8238	191	56.8238	194
56.8665	148	56.8665	171	56.8665	186	56.8665	194	56.8665	216	56.8665	201	56.8665	213	56.8665	216	56.8665	234
56.9093	126	56.9093	169	56.9093	242	56.9093	225	56.9093	222	56.9093	219	56.9093	185	56.9093	222	56.9093	184
56.9521	148	56.9521	203	56.9521	247	56.9521	197	56.9521	210	56.9521	199	56.9521	220	56.9521	210	56.9521	210
56.9948	139	56.9948	167	56.9948	176	56.9948	187	56.9948	202	56.9948	201	56.9948	179	56.9948	202	56.9948	189
57.0376	125	57.0376	165	57.0376	200	57.0376	203	57.0376	207	57.0376	211	57.0376	199	57.0376	207	57.0376	224
57.0803	132	57.0803	172	57.0803	217	57.0803	204	57.0803	214	57.0803	225	57.0803	193	57.0803	214	57.0803	240
57.1231	132	57.1231	187	57.1231	217	57.1231	198	57.1231	208	57.1231	222	57.1231	223	57.1231	208	57.1231	198
57.1659	144	57.1659	185	57.1659	218	57.1659	220	57.1659	208	57.1659	218	57.1659	207	57.1659	208	57.1659	201
57.2086	168	57.2086	180	57.2086	246	57.2086	200	57.2086	210	57.2086	193	57.2086	187	57.2086	210	57.2086	220
57.2514	156	57.2514	185	57.2514	238	57.2514	194	57.2514	247	57.2514	194	57.2514	196	57.2514	247	57.2514	216
57.2942	171	57.2942	176	57.2942	198	57.2942	173	57.2942	225	57.2942	187	57.2942	192	57.2942	225	57.2942	206
57.3369	173	57.3369	191	57.3369	207	57.3369	196	57.3369	218	57.3369	214	57.3369	203	57.3369	218	57.3369	191
57.3797	171	57.3797	177	57.3797	182	57.3797	171	57.3797	217	57.3797	210	57.3797	200	57.3797	217	57.3797	224
57.4224	150	57.4224	168	57.4224	202	57.4224	218	57.4224	189	57.4224	211	57.4224	181	57.4224	189	57.4224	196
57.4652	136	57.4652	167	57.4652	189	57.4652	199	57.4652	236	57.4652	224	57.4652	210	57.4652	236	57.4652	199
57.508	156	57.508	176	57.508	195	57.508	196	57.508	227	57.508	234	57.508	204	57.508	227	57.508	230
57.5507	136	57.5507	185	57.5507	198	57.5507	217	57.5507	211	57.5507	200	57.5507	204	57.5507	211	57.5507	215
57.5935	131	57.5935	188	57.5935	174	57.5935	207	57.5935	183	57.5935	203	57.5935	217	57.5935	183	57.5935	218
57.6362	136	57.6362	170	57.6362	187	57.6362	172	57.6362	221	57.6362	225	57.6362	190	57.6362	221	57.6362	218
57.679	136	57.679	170	57.679	196	57.679	205	57.679	225	57.679	211	57.679	222	57.679	225	57.679	223
57.7218	134	57.7218	173	57.7218	194	57.7218	212	57.7218	218	57.7218	222	57.7218	216	57.7218	218	57.7218	198
57.7645	146	57.7645	171	57.7645	203	57.7645	213	57.7645	219	57.7645	213	57.7645	203	57.7645	219	57.7645	208
57.8073	157	57.8073	193	57.8073	195	57.8073	206	57.8073	239	57.8073	217	57.8073	197	57.8073	239	57.8073	206
57.8501	137	57.8501	181	57.8501	194	57.8501	191	57.8501	211	57.8501	194	57.8501	206	57.8501	211	57.8501	231
57.8928	139	57.8928	182	57.8928	193	57.8928	191	57.8928	238	57.8928	204	57.8928	194	57.8928	238	57.8928	223
57.9356	139	57.9356	174	57.9356	179	57.9356	218	57.9356	199	57.9356	226	57.9356	216	57.9356	199	57.9356	223
57.9783	151	57.9783	202	57.9783	169	57.9783	203	57.9783	203	57.9783	210	57.9783	194	57.9783	203	57.9783	206
58.0211	135	58.0211	153	58.0211	207	58.0211	209	58.0211	191	58.0211	218	58.0211	189	58.0211	191	58.0211	225
58.0639	138	58.0639	164	58.0639	196	58.0639	206	58.0639	224	58.0639	198	58.0639	227	58.0639	224	58.0639	215
58.1066	150	58.1066	184	58.1066	178	58.1066	184	58.1066	183	58.1066	243	58.1066	191	58.1066	183	58.1066	220
58.1494	131	58.1494	170	58.1494	214	58.1494	196	58.1494	219	58.1494	187	58.1494	224	58.1494	219	58.1494	233
58.1921	160	58.1921	152	58.1921	183	58.1921	180	58.1921	202	58.1921	200	58.1921	203	58.1921	202	58.1921	227
58.2349	139	58.2349	185	58.2349	202	58.2349	215	58.2349	210	58.2349	216	58.2349	185	58.2349	210	58.2349	217
58.2777	151	58.2777	173	58.2777	209	58.2777	206	58.2777	214	58.2777	220	58.2777	209	58.2777	214	58.2777	216
58.3204	149	58.3204	179	58.3204	191	58.3204	252	58.3204	200	58.3204	207	58.3204	194	58.3204	200	58.3204	225
58.3632	123	58.3632	177	58.3632	190	58.3632	190	58.3632	233	58.3632	188	58.3632	220	58.3632	233	58.3632	203
58.4059	132	58.4059	193	58.4059	209	58.4059	203	58.4059	216	58.4059	203	58.4059	215	58.4059	216	58.4059	215
58.4487	123	58.4487	175	58.4487	215	58.4487	214	58.4487	225	58.4487	233	58.4487	240	58.4487	225	58.4487	227
58.4915	139	58.4915	165	58.4915	203	58.4915	194	58.4915	213	58.4915	187	58.4915	209	58.4915	213	58.4915	217
58.5342	145	58.5342	167	58.5342	208	58.5342	230	58.5342	210	58.5342	197	58.5342	209	58.5342	210	58.5342	211
58.577	131	58.577	173	58.577	208	58.577	187	58.577	208	58.577	205	58.577	217	58.577	208	58.577	201
58.6198	155	58.6198	155	58.6198	185	58.6198	202	58.6198	202	58.6198	259	58.6198	213	58.6198	202	58.6198	239
58.6625	135	58.6625	195	58.6625	204	58.6625	216	58.6625	218	58.6625	193	58.6625	192	58.6625	218	58.6625	208
58.7053	170	58.7053	188	58.7053	193	58.7053	229	58.7053	219	58.7053	178	58.7053	205	58.7053	219	58.7053	200
58.748	158	58.748	160	58.748	179	58.748	188	58.748	227	58.748	195	58.748	201	58.748	227	58.748	179
58.7908	167	58.7908	166	58.7908	206	58.7908	191	58.7908	214	58.7908	214	58.7908	193	58.7908	214	58.7908	178
58.8336	184	58.8336	157	58.8336	198	58.8336	174	58.8336	227	58.8336	218	58.8336	219	58.8336	227	58.8336	215
58.8763	175	58.8763	146	58.8763	182	58.8763	183	58.8763	209	58.8763	243	58.8763	211	58.8763	209	58.8763	220
58.9191	218	58.9191	164	58.9191	184	58.9191	204	58.9191	216	58.9191	206	58.9191	228	58.9191	216	58.9191	196
58.9618	190	58.9618	175	58.9618	208	58.9618	185	58.9618	223	58.9618	189	58.9618	208	58.9618	223	58.9618	251
59.0046	200	59.0046	173	59.0046	199	59.0046	218	59.0046	212	59.0046	233	59.0046	211	59.0046	212	59.0046	215
59.0474	202	59.0474	153	59.0474	199	59.0474	195	59.0474	228	59.0474	206	59.0474	217	59.0474	228	59.0474	228
59.0901	209	59.0901	164	59.0901	202	59.0901	206	59.0901	226	59.0901	202	59.0901	215	59.0901	226	59.0901	197
59.1329	208	59.1329	152	59.1329	228	59.1329	221	59.1329	212	59.1329	211	59.1329	212	59.1329	212	59.1329	229
59.1757	206	59.1757	163	59.1757	201	59.1757	202	59.1757	214	59.1757	202	59.1757	239	59.1757	214	59.1757	217
59.2184	197	59.2184	174	59.2184	218	59.2184	180	59.2184	225	59.2184	217	59.2184	200	59.2184	225	59.2184	220
59.2612	154	59.2612	165	59.2612	193	59.2612	209	59.2612	225	59.2612	214	59.2612	241	59.2612	225	59.2612	190
59.3039	166	59.3039	161	59.3039	197	59.3039	201	59.3039	217	59.3039	223	59.3039	222	59.3039	217	59.3039	201
59.3467	180	59.3467	182	59.3467	213	59.3467	197	59.3467	252	59.3467	242	59.3467	219	59.3467	252	59.3467	243
59.3895	170	59.3895	179	59.3895	185	59.3895	205	59.3895	228	59.3895	223	59.3895	207	59.3895	228	59.3895	212
59.4322	166	59.4322	177	59.4322	189	59.4322	236	59.4322	210	59.4322	185	59.4322	212	59.4322	210	59.4322	250
59.475	185	59.475	180	59.475	202	59.475	217	59.475	237	59.475	210	59.475	205	59.475	237	59.475	218
59.5177	207	59.5177	209	59.5177	172	59.5177	202	59.5177	193	59.5177	234	59.5177	202	59.5177	193	59.5177	220
59.5605	229	59.5605	217	59.5605	210	59.5605	185	59.5605	210	59.5605	190	59.5605	214	59.5605	210	59.5605	218
59.6033	237	59.6033	213	59.6033	217	59.6033	210	59.6033	192	59.6033	197	59.6033	218	59.6033	192	59.6033	241
59.646	314	59.646	261	59.646	228	59.646	199	59.646	210	59.646	214	59.646	215	59.646	210	59.646	206
59.6888	378	59.6888	264	59.6888	218	59.6888	180	59.6888	230	59.6888	209	59.6888	199	59.6888	230	59.6888	238
59.7316	384	59.7316	297	59.7316	218	59.7316	191	59.7316	220	59.7316	209	59.7316	209	59.7316	220	59.7316	221
59.7743	473	59.7743	382	59.7743	241	59.7743	200	59.7743	229	59.7743	213	59.7743	225	59.7743	229	59.7743	243
59.8171	562	59.8171	370	59.8171	270	59.8171	211	59.8171	217	59.8171	242	59.8171	231	59.8171	217	59.8171	222
59.8598	670	59.8598	468	59.8598	274	59.8598	218	59.8598	228	59.8598	219	59.8598	224	59.8598	228	59.8598	229
59.9026	795	59.9026	502	59.9026	267	59.9026	213	59.9026	256	59.9026	218	59.9026	238	59.9026	256	59.9026	221
59.9454	858	59.9454	603	59.9454	303	59.9454	223	59.9454	226	59.9454	217	59.9454	231	59.9454	226	59.9454	234
59.9881	818	59.9881	678	59.9881	276	59.9881	188	59.9881	201	59.9881	243	59.9881	204	59.9881	201	59.9881	224
60.0309	641	60.0309	625	60.0309	265	60.0309	206	60.0309	212	60.0309	233	60.0309	209	60.0309	212	60.0309	245
60.0736	572	60.0736	492	60.0736	255	60.0736	227	60.0736	222	60.0736	236	60.0736	226	60.0736	222	60.0736	214
60.1164	525	60.1164	466	60.1164	242	60.1164	225	60.1164	208	60.1164	227	60.1164	228	60.1164	208	60.1164	219
60.1592	462	60.1592	389	60.1592	248	60.1592	201	60.1592	242	60.1592	235	60.1592	218	60.1592	242	60.1592	223
60.2019	304	60.2019	360	60.2019	261	60.2019	203	60.2019	203	60.2019	212	60.2019	223	60.2019	203	60.2019	200
60.2447	235	60.2447	226	60.2447	217	60.2447	215	60.2447	205	60.2447	233	60.2447	235	60.2447	205	60.2447	228
60.2874	207	60.2874	210	60.2874	231	60.2874	208	60.2874	213	60.2874	226	60.2874	217	60.2874	213	60.2874	257
60.3302	166	60.3302	215	60.3302	211	60.3302	237	60.3302	216	60.3302	203	60.3302	206	60.3302	216	60.3302	206
60.373	175	60.373	187	60.373	223	60.373	214	60.373	216	60.373	196	60.373	208	60.373	216	60.373	239
60.4157	164	60.4157	178	60.4157	173	60.4157	189	60.4157	216	60.4157	234	60.4157	213	60.4157	216	60.4157	234
60.4585	148	60.4585	151	60.4585	224	60.4585	222	60.4585	226	60.4585	216	60.4585	209	60.4585	226	60.4585	261
60.5013	151	60.5013	152	60.5013	163	60.5013	197	60.5013	236	60.5013	225	60.5013	214	60.5013	236	60.5013	204
60.544	158	60.544	187	60.544	201	60.544	205	60.544	210	60.544	199	60.544	211	60.544	210	60.544	208
60.5868	158	60.5868	193	60.5868	202	60.5868	222	60.5868	247	60.5868	219	60.5868	224	60.5868	247	60.5868	232
60.6295	160	60.6295	166	60.6295	206	60.6295	190	60.6295	225	60.6295	217	60.6295	212	60.6295	225	60.6295	253
60.6723	179	60.6723	172	60.6723	198	60.6723	237	60.6723	220	60.6723	237	60.6723	225	60.6723	220	60.6723	221
60.7151	138	60.7151	168	60.7151	185	60.7151	204	60.7151	203	60.7151	210	60.7151	208	60.7151	203	60.7151	239
60.7578	131	60.7578	189	60.7578	217	60.7578	205	60.7578	239	60.7578	205	60.7578	229	60.7578	239	60.7578	215
60.8006	160	60.8006	167	60.8006	201	60.8006	214	60.8006	221	60.8006	217	60.8006	215	60.8006	221	60.8006	212
60.8433	139	60.8433	197	60.8433	187	60.8433	206	60.8433	204	60.8433	217	60.8433	207	60.8433	204	60.8433	200
60.8861	152	60.8861	170	60.8861	187	60.8861	211	60.8861	219	60.8861	213	60.8861	179	60.8861	219	60.8861	211
60.9289	125	60.9289	140	60.9289	177	60.9289	206	60.9289	218	60.9289	193	60.9289	232	60.9289	218	60.9289	217
60.9716	125	60.9716	171	60.9716	216	60.9716	204	60.9716	208	60.9716	210	60.9716	235	60.9716	208	60.9716	227
61.0144	147	61.0144	181	61.0144	197	61.0144	205	61.0144	197	61.0144	205	61.0144	205	61.0144	197	61.0144	209
61.0572	135	61.0572	185	61.0572	211	61.0572	200	61.0572	193	61.0572	195	61.0572	200	61.0572	193	61.0572	223
61.0999	139	61.0999	164	61.0999	193	61.0999	202	61.0999	241	61.0999	197	61.0999	168	61.0999	241	61.0999	222
61.1427	119	61.1427	181	61.1427	197	61.1427	203	61.1427	216	61.1427	240	61.1427	207	61.1427	216	61.1427	244
61.1854	138	61.1854	166	61.1854	191	61.1854	200	61.1854	212	61.1854	207	61.1854	214	61.1854	212	61.1854	185
61.2282	126	61.2282	143	61.2282	193	61.2282	209	61.2282	211	61.2282	208	61.2282	214	61.2282	211	61.2282	220
61.271	151	61.271	177	61.271	213	61.271	211	61.271	227	61.271	183	61.271	225	61.271	227	61.271	208
61.3137	142	61.3137	155	61.3137	231	61.3137	198	61.3137	209	61.3137	202	61.3137	214	61.3137	209	61.3137	208
61.3565	127	61.3565	173	61.3565	179	61.3565	210	61.3565	233	61.3565	203	61.3565	201	61.3565	233	61.3565	209
61.3992	144	61.3992	170	61.3992	200	61.3992	201	61.3992	222	61.3992	199	61.3992	223	61.3992	222	61.3992	219
61.442	148	61.442	168	61.442	175	61.442	192	61.442	234	61.442	223	61.442	235	61.442	234	61.442	211
61.4848	120	61.4848	161	61.4848	216	61.4848	217	61.4848	221	61.4848	210	61.4848	231	61.4848	221	61.4848	213
61.5275	112	61.5275	178	61.5275	181	61.5275	192	61.5275	226	61.5275	216	61.5275	203	61.5275	226	61.5275	233
61.5703	126	61.5703	144	61.5703	211	61.5703	199	61.5703	252	61.5703	215	61.5703	212	61.5703	252	61.5703	221
61.613	131	61.613	184	61.613	188	61.613	187	61.613	215	61.613	205	61.613	199	61.613	215	61.613	199
61.6558	130	61.6558	145	61.6558	194	61.6558	209	61.6558	204	61.6558	229	61.6558	199	61.6558	204	61.6558	229
61.6986	139	61.6986	173	61.6986	231	61.6986	205	61.6986	218	61.6986	197	61.6986	194	61.6986	218	61.6986	234
61.7413	138	61.7413	186	61.7413	209	61.7413	240	61.7413	211	61.7413	217	61.7413	221	61.7413	211	61.7413	226
61.7841	124	61.7841	198	61.7841	215	61.7841	240	61.7841	197	61.7841	209	61.7841	231	61.7841	197	61.7841	222
61.8269	103	61.8269	171	61.8269	178	61.8269	193	61.8269	236	61.8269	211	61.8269	198	61.8269	236	61.8269	210
61.8696	109	61.8696	180	61.8696	181	61.8696	218	61.8696	228	61.8696	219	61.8696	204	61.8696	228	61.8696	199
61.9124	155	61.9124	185	61.9124	222	61.9124	196	61.9124	227	61.9124	193	61.9124	225	61.9124	227	61.9124	219
61.9551	125	61.9551	193	61.9551	223	61.9551	203	61.9551	212	61.9551	204	61.9551	208	61.9551	212	61.9551	235
61.9979	128	61.9979	152	61.9979	202	61.9979	192	61.9979	210	61.9979	214	61.9979	224	61.9979	210	61.9979	200
62.0407	135	62.0407	168	62.0407	219	62.0407	216	62.0407	207	62.0407	205	62.0407	209	62.0407	207	62.0407	234
62.0834	131	62.0834	162	62.0834	208	62.0834	216	62.0834	210	62.0834	219	62.0834	212	62.0834	210	62.0834	196
62.1262	131	62.1262	174	62.1262	212	62.1262	199	62.1262	203	62.1262	223	62.1262	223	62.1262	203	62.1262	201
62.1689	172	62.1689	146	62.1689	217	62.1689	200	62.1689	231	62.1689	240	62.1689	224	62.1689	231	62.1689	235
62.2117	122	62.2117	179	62.2117	212	62.2117	210	62.2117	226	62.2117	195	62.2117	203	62.2117	226	62.2117	217
62.2545	140	62.2545	159	62.2545	198	62.2545	207	62.2545	201	62.2545	217	62.2545	195	62.2545	201	62.2545	214
62.2972	135	62.2972	176	62.2972	213	62.2972	202	62.2972	221	62.2972	235	62.2972	213	62.2972	221	62.2972	224
62.34	136	62.34	164	62.34	205	62.34	182	62.34	184	62.34	201	62.34	218	62.34	184	62.34	208
62.3828	124	62.3828	163	62.3828	212	62.3828	185	62.3828	212	62.3828	214	62.3828	212	62.3828	212	62.3828	216
62.4255	122	62.4255	165	62.4255	200	62.4255	209	62.4255	221	62.4255	215	62.4255	223	62.4255	221	62.4255	249
62.4683	140	62.4683	181	62.4683	192	62.4683	203	62.4683	256	62.4683	207	62.4683	213	62.4683	256	62.4683	236
62.511	137	62.511	176	62.511	198	62.511	207	62.511	219	62.511	202	62.511	192	62.511	219	62.511	222
62.5538	160	62.5538	211	62.5538	214	62.5538	181	62.5538	208	62.5538	222	62.5538	196	62.5538	208	62.5538	198
62.5966	151	62.5966	200	62.5966	215	62.5966	184	62.5966	206	62.5966	207	62.5966	206	62.5966	206	62.5966	230
62.6393	168	62.6393	185	62.6393	185	62.6393	231	62.6393	197	62.6393	193	62.6393	225	62.6393	197	62.6393	217
62.6821	188	62.6821	197	62.6821	174	62.6821	188	62.6821	202	62.6821	216	62.6821	207	62.6821	202	62.6821	196
62.7248	179	62.7248	190	62.7248	215	62.7248	204	62.7248	216	62.7248	226	62.7248	205	62.7248	216	62.7248	243
62.7676	160	62.7676	175	62.7676	203	62.7676	201	62.7676	206	62.7676	199	62.7676	186	62.7676	206	62.7676	225
62.8104	188	62.8104	171	62.8104	213	62.8104	194	62.8104	239	62.8104	236	62.8104	201	62.8104	239	62.8104	224
62.8531	175	62.8531	206	62.8531	210	62.8531	213	62.8531	215	62.8531	201	62.8531	230	62.8531	215	62.8531	224
62.8959	199	62.8959	182	62.8959	177	62.8959	175	62.8959	220	62.8959	214	62.8959	215	62.8959	220	62.8959	208
62.9387	167	62.9387	157	62.9387	196	62.9387	204	62.9387	214	62.9387	204	62.9387	170	62.9387	214	62.9387	264
62.9814	166	62.9814	188	62.9814	246	62.9814	220	62.9814	235	62.9814	228	62.9814	187	62.9814	235	62.9814	222
63.0242	139	63.0242	179	63.0242	216	63.0242	182	63.0242	233	63.0242	238	63.0242	187	63.0242	233	63.0242	209
63.0669	148	63.0669	189	63.0669	202	63.0669	209	63.0669	201	63.0669	246	63.0669	225	63.0669	201	63.0669	234
63.1097	154	63.1097	162	63.1097	242	63.1097	196	63.1097	184	63.1097	233	63.1097	216	63.1097	184	63.1097	230
63.1525	153	63.1525	177	63.1525	187	63.1525	162	63.1525	228	63.1525	220	63.1525	199	63.1525	228	63.1525	208
63.1952	149	63.1952	184	63.1952	180	63.1952	206	63.1952	239	63.1952	204	63.1952	217	63.1952	239	63.1952	241
63.238	138	63.238	184	63.238	187	63.238	218	63.238	225	63.238	226	63.238	194	63.238	225	63.238	232
63.2807	123	63.2807	186	63.2807	191	63.2807	196	63.2807	207	63.2807	203	63.2807	202	63.2807	207	63.2807	203
63.3235	150	63.3235	184	63.3235	189	63.3235	222	63.3235	241	63.3235	221	63.3235	202	63.3235	241	63.3235	232
63.3663	142	63.3663	205	63.3663	199	63.3663	187	63.3663	245	63.3663	204	63.3663	191	63.3663	245	63.3663	228
63.409	154	63.409	178	63.409	189	63.409	190	63.409	226	63.409	214	63.409	228	63.409	226	63.409	228
63.4518	126	63.4518	186	63.4518	183	63.4518	235	63.4518	202	63.4518	214	63.4518	215	63.4518	202	63.4518	234
63.4945	120	63.4945	191	63.4945	203	63.4945	203	63.4945	218	63.4945	202	63.4945	215	63.4945	218	63.4945	233
63.5373	157	63.5373	174	63.5373	189	63.5373	198	63.5373	220	63.5373	202	63.5373	208	63.5373	220	63.5373	212
63.5801	132	63.5801	170	63.5801	194	63.5801	222	63.5801	206	63.5801	222	63.5801	193	63.5801	206	63.5801	223
63.6228	163	63.6228	195	63.6228	219	63.6228	210	63.6228	195	63.6228	233	63.6228	205	63.6228	195	63.6228	232
63.6656	117	63.6656	189	63.6656	190	63.6656	224	63.6656	223	63.6656	198	63.6656	222	63.6656	223	63.6656	239
63.7084	161	63.7084	175	63.7084	220	63.7084	212	63.7084	198	63.7084	254	63.7084	215	63.7084	198	63.7084	214
63.7511	163	63.7511	183	63.7511	194	63.7511	211	63.7511	189	63.7511	219	63.7511	188	63.7511	189	63.7511	214
63.7939	155	63.7939	193	63.7939	180	63.7939	191	63.7939	222	63.7939	213	63.7939	203	63.7939	222	63.7939	216
63.8366	190	63.8366	206	63.8366	200	63.8366	197	63.8366	198	63.8366	196	63.8366	210	63.8366	198	63.8366	215
63.8794	191	63.8794	214	63.8794	202	63.8794	207	63.8794	218	63.8794	220	63.8794	208	63.8794	218	63.8794	209
63.9222	215	63.9222	230	63.9222	208	63.9222	190	63.9222	240	63.9222	201	63.9222	208	63.9222	240	63.9222	232
63.9649	236	63.9649	240	63.9649	190	63.9649	245	63.9649	189	63.9649	236	63.9649	210	63.9649	189	63.9649	213
64.0077	269	64.0077	289	64.0077	208	64.0077	201	64.0077	201	64.0077	209	64.0077	215	64.0077	201	64.0077	229
64.0504	292	64.0504	278	64.0504	251	64.0504	236	64.0504	205	64.0504	202	64.0504	202	64.0504	205	64.0504	242
64.0932	288	64.0932	280	64.0932	190	64.0932	200	64.0932	209	64.0932	206	64.0932	189	64.0932	209	64.0932	213
64.136	257	64.136	274	64.136	200	64.136	208	64.136	206	64.136	199	64.136	194	64.136	206	64.136	220
64.1787	311	64.1787	220	64.1787	230	64.1787	219	64.1787	206	64.1787	181	64.1787	204	64.1787	206	64.1787	210
64.2215	292	64.2215	237	64.2215	229	64.2215	229	64.2215	225	64.2215	211	64.2215	197	64.2215	225	64.2215	199
64.2643	241	64.2643	215	64.2643	205	64.2643	185	64.2643	195	64.2643	226	64.2643	204	64.2643	195	64.2643	218
64.307	242	64.307	220	64.307	201	64.307	201	64.307	208	64.307	235	64.307	202	64.307	208	64.307	196
64.3498	205	64.3498	204	64.3498	224	64.3498	231	64.3498	195	64.3498	209	64.3498	194	64.3498	195	64.3498	216
64.3925	207	64.3925	210	64.3925	193	64.3925	206	64.3925	209	64.3925	227	64.3925	214	64.3925	209	64.3925	229
64.4353	199	64.4353	171	64.4353	213	64.4353	209	64.4353	234	64.4353	229	64.4353	220	64.4353	234	64.4353	213
64.4781	207	64.4781	169	64.4781	201	64.4781	219	64.4781	189	64.4781	208	64.4781	199	64.4781	189	64.4781	232
64.5208	215	64.5208	173	64.5208	218	64.5208	212	64.5208	209	64.5208	226	64.5208	204	64.5208	209	64.5208	197
64.5636	178	64.5636	174	64.5636	220	64.5636	203	64.5636	224	64.5636	201	64.5636	191	64.5636	224	64.5636	219
64.6063	207	64.6063	154	64.6063	211	64.6063	172	64.6063	206	64.6063	200	64.6063	218	64.6063	206	64.6063	206
64.6491	207	64.6491	191	64.6491	216	64.6491	187	64.6491	214	64.6491	206	64.6491	214	64.6491	214	64.6491	207
64.6919	215	64.6919	183	64.6919	224	64.6919	205	64.6919	229	64.6919	225	64.6919	201	64.6919	229	64.6919	212
64.7346	209	64.7346	147	64.7346	181	64.7346	205	64.7346	188	64.7346	210	64.7346	192	64.7346	188	64.7346	222
64.7774	244	64.7774	176	64.7774	203	64.7774	201	64.7774	218	64.7774	206	64.7774	214	64.7774	218	64.7774	200
64.8202	197	64.8202	166	64.8202	197	64.8202	205	64.8202	196	64.8202	209	64.8202	223	64.8202	196	64.8202	195
64.8629	203	64.8629	169	64.8629	226	64.8629	204	64.8629	203	64.8629	234	64.8629	190	64.8629	203	64.8629	210
64.9057	232	64.9057	152	64.9057	215	64.9057	201	64.9057	218	64.9057	201	64.9057	216	64.9057	218	64.9057	210
64.9484	196	64.9484	172	64.9484	217	64.9484	202	64.9484	227	64.9484	238	64.9484	179	64.9484	227	64.9484	203
64.9912	218	64.9912	144	64.9912	209	64.9912	216	64.9912	203	64.9912	250	64.9912	207	64.9912	203	64.9912	201
65.034	193	65.034	188	65.034	211	65.034	204	65.034	222	65.034	188	65.034	200	65.034	222	65.034	209
65.0767	168	65.0767	170	65.0767	217	65.0767	189	65.0767	221	65.0767	193	65.0767	204	65.0767	221	65.0767	211
65.1195	177	65.1195	173	65.1195	185	65.1195	214	65.1195	208	65.1195	204	65.1195	194	65.1195	208	65.1195	239
65.1622	164	65.1622	148	65.1622	209	65.1622	194	65.1622	194	65.1622	183	65.1622	204	65.1622	194	65.1622	243
65.205	149	65.205	148	65.205	198	65.205	205	65.205	219	65.205	228	65.205	195	65.205	219	65.205	214
65.2478	159	65.2478	172	65.2478	189	65.2478	214	65.2478	207	65.2478	196	65.2478	214	65.2478	207	65.2478	235
65.2905	171	65.2905	176	65.2905	203	65.2905	179	65.2905	215	65.2905	205	65.2905	218	65.2905	215	65.2905	205
65.3333	134	65.3333	156	65.3333	201	65.3333	185	65.3333	199	65.3333	217	65.3333	196	65.3333	199	65.3333	204
65.376	160	65.376	168	65.376	197	65.376	192	65.376	223	65.376	216	65.376	188	65.376	223	65.376	212
65.4188	152	65.4188	203	65.4188	201	65.4188	184	65.4188	212	65.4188	220	65.4188	192	65.4188	212	65.4188	227
65.4616	143	65.4616	159	65.4616	188	65.4616	211	65.4616	197	65.4616	209	65.4616	203	65.4616	197	65.4616	205
65.5043	156	65.5043	169	65.5043	184	65.5043	208	65.5043	204	65.5043	208	65.5043	199	65.5043	204	65.5043	208
65.5471	137	65.5471	188	65.5471	202	65.5471	197	65.5471	214	65.5471	209	65.5471	197	65.5471	214	65.5471	210
65.5899	175	65.5899	144	65.5899	207	65.5899	200	65.5899	222	65.5899	190	65.5899	196	65.5899	222	65.5899	205
65.6326	155	65.6326	173	65.6326	207	65.6326	188	65.6326	193	65.6326	220	65.6326	205	65.6326	193	65.6326	210
65.6754	170	65.6754	186	65.6754	198	65.6754	203	65.6754	236	65.6754	251	65.6754	189	65.6754	236	65.6754	201
65.7181	164	65.7181	188	65.7181	206	65.7181	228	65.7181	194	65.7181	231	65.7181	192	65.7181	194	65.7181	204
65.7609	148	65.7609	188	65.7609	196	65.7609	205	65.7609	195	65.7609	215	65.7609	203	65.7609	195	65.7609	215
65.8037	163	65.8037	183	65.8037	187	65.8037	191	65.8037	203	65.8037	198	65.8037	197	65.8037	203	65.8037	226
65.8464	167	65.8464	187	65.8464	201	65.8464	214	65.8464	207	65.8464	212	65.8464	208	65.8464	207	65.8464	222
65.8892	164	65.8892	166	65.8892	218	65.8892	205	65.8892	222	65.8892	207	65.8892	174	65.8892	222	65.8892	209
65.9319	144	65.9319	137	65.9319	192	65.9319	203	65.9319	210	65.9319	221	65.9319	191	65.9319	210	65.9319	201
65.9747	151	65.9747	163	65.9747	208	65.9747	210	65.9747	193	65.9747	218	65.9747	196	65.9747	193	65.9747	205
66.0175	146	66.0175	172	66.0175	187	66.0175	194	66.0175	238	66.0175	212	66.0175	171	66.0175	238	66.0175	205
66.0602	141	66.0602	168	66.0602	161	66.0602	171	66.0602	186	66.0602	205	66.0602	204	66.0602	186	66.0602	197
66.103	126	66.103	177	66.103	197	66.103	187	66.103	211	66.103	194	66.103	234	66.103	211	66.103	219
66.1458	149	66.1458	163	66.1458	200	66.1458	202	66.1458	199	66.1458	230	66.1458	194	66.1458	199	66.1458	204
66.1885	157	66.1885	152	66.1885	188	66.1885	202	66.1885	229	66.1885	219	66.1885	199	66.1885	229	66.1885	184
66.2313	126	66.2313	150	66.2313	184	66.2313	219	66.2313	190	66.2313	202	66.2313	216	66.2313	190	66.2313	217
66.274	135	66.274	156	66.274	182	66.274	188	66.274	224	66.274	186	66.274	203	66.274	224	66.274	205
66.3168	146	66.3168	164	66.3168	182	66.3168	184	66.3168	192	66.3168	181	66.3168	217	66.3168	192	66.3168	195
66.3596	146	66.3596	202	66.3596	201	66.3596	190	66.3596	215	66.3596	186	66.3596	189	66.3596	215	66.3596	213
66.4023	118	66.4023	166	66.4023	191	66.4023	209	66.4023	215	66.4023	206	66.4023	183	66.4023	215	66.4023	220
66.4451	138	66.4451	173	66.4451	200	66.4451	177	66.4451	177	66.4451	190	66.4451	206	66.4451	177	66.4451	196
66.4878	112	66.4878	160	66.4878	202	66.4878	207	66.4878	214	66.4878	204	66.4878	197	66.4878	214	66.4878	210
66.5306	111	66.5306	170	66.5306	204	66.5306	200	66.5306	199	66.5306	172	66.5306	185	66.5306	199	66.5306	225
66.5734	135	66.5734	156	66.5734	197	66.5734	200	66.5734	199	66.5734	210	66.5734	210	66.5734	199	66.5734	219
66.6161	118	66.6161	188	66.6161	191	66.6161	198	66.6161	197	66.6161	202	66.6161	171	66.6161	197	66.6161	217
66.6589	130	66.6589	165	66.6589	148	66.6589	188	66.6589	195	66.6589	204	66.6589	220	66.6589	195	66.6589	183
66.7017	124	66.7017	167	66.7017	224	66.7017	190	66.7017	177	66.7017	179	66.7017	196	66.7017	177	66.7017	216
66.7444	159	66.7444	147	66.7444	194	66.7444	172	66.7444	207	66.7444	182	66.7444	188	66.7444	207	66.7444	187
66.7872	125	66.7872	189	66.7872	195	66.7872	192	66.7872	204	66.7872	217	66.7872	199	66.7872	204	66.7872	231
66.8299	144	66.8299	150	66.8299	214	66.8299	183	66.8299	209	66.8299	209	66.8299	232	66.8299	209	66.8299	208
66.8727	128	66.8727	192	66.8727	194	66.8727	187	66.8727	218	66.8727	189	66.8727	196	66.8727	218	66.8727	196
66.9155	129	66.9155	163	66.9155	188	66.9155	192	66.9155	187	66.9155	185	66.9155	178	66.9155	187	66.9155	253
66.9582	128	66.9582	157	66.9582	180	66.9582	165	66.9582	211	66.9582	175	66.9582	192	66.9582	211	66.9582	195
67.001	125	67.001	179	67.001	187	67.001	210	67.001	192	67.001	197	67.001	199	67.001	192	67.001	218
67.0437	138	67.0437	149	67.0437	206	67.0437	170	67.0437	219	67.0437	209	67.0437	196	67.0437	219	67.0437	200
67.0865	138	67.0865	161	67.0865	198	67.0865	193	67.0865	207	67.0865	215	67.0865	186	67.0865	207	67.0865	203
67.1293	157	67.1293	137	67.1293	194	67.1293	189	67.1293	213	67.1293	189	67.1293	185	67.1293	213	67.1293	209
67.172	148	67.172	165	67.172	200	67.172	207	67.172	196	67.172	203	67.172	182	67.172	196	67.172	223
67.2148	151	67.2148	178	67.2148	188	67.2148	201	67.2148	197	67.2148	212	67.2148	203	67.2148	197	67.2148	187
67.2575	154	67.2575	186	67.2575	198	67.2575	170	67.2575	216	67.2575	189	67.2575	193	67.2575	216	67.2575	207
67.3003	163	67.3003	175	67.3003	173	67.3003	162	67.3003	203	67.3003	202	67.3003	208	67.3003	203	67.3003	197
67.3431	227	67.3431	157	67.3431	175	67.3431	172	67.3431	183	67.3431	183	67.3431	180	67.3431	183	67.3431	201
67.3858	226	67.3858	191	67.3858	195	67.3858	183	67.3858	209	67.3858	169	67.3858	189	67.3858	209	67.3858	200
67.4286	285	67.4286	238	67.4286	213	67.4286	176	67.4286	203	67.4286	200	67.4286	206	67.4286	203	67.4286	205
67.4714	269	67.4714	236	67.4714	221	67.4714	208	67.4714	236	67.4714	187	67.4714	224	67.4714	236	67.4714	181
67.5141	313	67.5141	259	67.5141	211	67.5141	179	67.5141	206	67.5141	200	67.5141	202	67.5141	206	67.5141	189
67.5569	335	67.5569	252	67.5569	200	67.5569	194	67.5569	197	67.5569	223	67.5569	204	67.5569	197	67.5569	205
67.5996	452	67.5996	320	67.5996	241	67.5996	203	67.5996	203	67.5996	214	67.5996	196	67.5996	203	67.5996	239
67.6424	495	67.6424	386	67.6424	235	67.6424	207	67.6424	197	67.6424	220	67.6424	197	67.6424	197	67.6424	195
67.6852	588	67.6852	352	67.6852	227	67.6852	190	67.6852	202	67.6852	224	67.6852	206	67.6852	202	67.6852	187
67.7279	647	67.7279	381	67.7279	243	67.7279	229	67.7279	213	67.7279	222	67.7279	221	67.7279	213	67.7279	214
67.7707	631	67.7707	444	67.7707	247	67.7707	211	67.7707	213	67.7707	225	67.7707	151	67.7707	213	67.7707	190
67.8134	562	67.8134	427	67.8134	234	67.8134	192	67.8134	193	67.8134	183	67.8134	209	67.8134	193	67.8134	181
67.8562	571	67.8562	367	67.8562	217	67.8562	184	67.8562	194	67.8562	201	67.8562	183	67.8562	194	67.8562	217
67.899	576	67.899	379	67.899	216	67.899	199	67.899	186	67.899	193	67.899	167	67.899	186	67.899	226
67.9417	576	67.9417	422	67.9417	226	67.9417	185	67.9417	218	67.9417	236	67.9417	189	67.9417	218	67.9417	226
67.9845	596	67.9845	435	67.9845	226	67.9845	171	67.9845	188	67.9845	207	67.9845	183	67.9845	188	67.9845	196
68.0273	662	68.0273	407	68.0273	240	68.0273	202	68.0273	198	68.0273	214	68.0273	209	68.0273	198	68.0273	183
68.07	677	68.07	460	68.07	239	68.07	199	68.07	199	68.07	191	68.07	192	68.07	199	68.07	198
68.1128	767	68.1128	480	68.1128	239	68.1128	210	68.1128	235	68.1128	225	68.1128	175	68.1128	235	68.1128	218
68.1555	812	68.1555	539	68.1555	242	68.1555	211	68.1555	213	68.1555	226	68.1555	172	68.1555	213	68.1555	200
68.1983	770	68.1983	561	68.1983	253	68.1983	200	68.1983	200	68.1983	223	68.1983	187	68.1983	200	68.1983	207
68.2411	733	68.2411	496	68.2411	241	68.2411	199	68.2411	194	68.2411	199	68.2411	189	68.2411	194	68.2411	203
68.2838	690	68.2838	470	68.2838	237	68.2838	215	68.2838	220	68.2838	213	68.2838	205	68.2838	220	68.2838	174
68.3266	654	68.3266	492	68.3266	280	68.3266	190	68.3266	192	68.3266	210	68.3266	221	68.3266	192	68.3266	194
68.3693	592	68.3693	457	68.3693	257	68.3693	202	68.3693	195	68.3693	219	68.3693	191	68.3693	195	68.3693	207
68.4121	457	68.4121	406	68.4121	231	68.4121	161	68.4121	185	68.4121	212	68.4121	206	68.4121	185	68.4121	195
68.4549	367	68.4549	338	68.4549	227	68.4549	202	68.4549	219	68.4549	204	68.4549	187	68.4549	219	68.4549	195
68.4976	316	68.4976	321	68.4976	242	68.4976	183	68.4976	205	68.4976	220	68.4976	202	68.4976	205	68.4976	196
68.5404	251	68.5404	264	68.5404	203	68.5404	182	68.5404	216	68.5404	203	68.5404	193	68.5404	216	68.5404	204
68.5831	215	68.5831	238	68.5831	228	68.5831	179	68.5831	186	68.5831	179	68.5831	187	68.5831	186	68.5831	206
68.6259	201	68.6259	213	68.6259	186	68.6259	197	68.6259	202	68.6259	190	68.6259	214	68.6259	202	68.6259	192
68.6687	173	68.6687	195	68.6687	186	68.6687	210	68.6687	199	68.6687	194	68.6687	179	68.6687	199	68.6687	181
68.7114	168	68.7114	181	68.7114	165	68.7114	178	68.7114	205	68.7114	190	68.7114	195	68.7114	205	68.7114	201
68.7542	137	68.7542	168	68.7542	192	68.7542	173	68.7542	198	68.7542	175	68.7542	175	68.7542	198	68.7542	189
68.797	134	68.797	168	68.797	192	68.797	182	68.797	207	68.797	190	68.797	180	68.797	207	68.797	196
68.8397	155	68.8397	170	68.8397	191	68.8397	212	68.8397	166	68.8397	184	68.8397	190	68.8397	166	68.8397	220
68.8825	143	68.8825	162	68.8825	202	68.8825	172	68.8825	208	68.8825	189	68.8825	212	68.8825	208	68.8825	186
68.9252	159	68.9252	140	68.9252	175	68.9252	188	68.9252	189	68.9252	170	68.9252	203	68.9252	189	68.9252	197
68.968	131	68.968	184	68.968	182	68.968	192	68.968	202	68.968	204	68.968	191	68.968	202	68.968	187
69.0108	135	69.0108	161	69.0108	201	69.0108	189	69.0108	182	69.0108	200	69.0108	215	69.0108	182	69.0108	195
69.0535	160	69.0535	162	69.0535	187	69.0535	178	69.0535	207	69.0535	200	69.0535	183	69.0535	207	69.0535	209
69.0963	136	69.0963	182	69.0963	174	69.0963	193	69.0963	200	69.0963	162	69.0963	199	69.0963	200	69.0963	196
69.139	143	69.139	153	69.139	199	69.139	179	69.139	219	69.139	197	69.139	171	69.139	219	69.139	189
69.1818	137	69.1818	167	69.1818	185	69.1818	159	69.1818	186	69.1818	174	69.1818	180	69.1818	186	69.1818	204
69.2246	129	69.2246	160	69.2246	182	69.2246	169	69.2246	202	69.2246	216	69.2246	184	69.2246	202	69.2246	179
69.2673	118	69.2673	150	69.2673	156	69.2673	175	69.2673	187	69.2673	161	69.2673	181	69.2673	187	69.2673	182
69.3101	116	69.3101	147	69.3101	161	69.3101	192	69.3101	193	69.3101	184	69.3101	210	69.3101	193	69.3101	194
69.3529	135	69.3529	166	69.3529	184	69.3529	198	69.3529	192	69.3529	204	69.3529	192	69.3529	192	69.3529	187
69.3956	132	69.3956	168	69.3956	167	69.3956	185	69.3956	194	69.3956	195	69.3956	176	69.3956	194	69.3956	181
69.4384	126	69.4384	141	69.4384	158	69.4384	188	69.4384	194	69.4384	187	69.4384	201	69.4384	194	69.4384	200
69.4811	140	69.4811	137	69.4811	167	69.4811	182	69.4811	183	69.4811	200	69.4811	148	69.4811	183	69.4811	179
69.5239	117	69.5239	152	69.5239	178	69.5239	163	69.5239	195	69.5239	188	69.5239	177	69.5239	195	69.5239	190
69.5667	116	69.5667	154	69.5667	176	69.5667	192	69.5667	179	69.5667	198	69.5667	165	69.5667	179	69.5667	197
69.6094	135	69.6094	173	69.6094	176	69.6094	177	69.6094	183	69.6094	162	69.6094	195	69.6094	183	69.6094	229
69.6522	123	69.6522	163	69.6522	193	69.6522	186	69.6522	178	69.6522	173	69.6522	197	69.6522	178	69.6522	211
69.6949	126	69.6949	162	69.6949	186	69.6949	173	69.6949	215	69.6949	178	69.6949	176	69.6949	215	69.6949	221
69.7377	135	69.7377	173	69.7377	191	69.7377	185	69.7377	178	69.7377	187	69.7377	169	69.7377	178	69.7377	185
69.7805	142	69.7805	136	69.7805	180	69.7805	177	69.7805	192	69.7805	190	69.7805	187	69.7805	192	69.7805	173
69.8232	109	69.8232	159	69.8232	189	69.8232	194	69.8232	212	69.8232	179	69.8232	189	69.8232	212	69.8232	180
69.866	147	69.866	179	69.866	174	69.866	196	69.866	158	69.866	207	69.866	186	69.866	158	69.866	198
69.9088	126	69.9088	139	69.9088	188	69.9088	189	69.9088	191	69.9088	185	69.9088	195	69.9088	191	69.9088	198
69.9515	147	69.9515	161	69.9515	180	69.9515	172	69.9515	189	69.9515	179	69.9515	173	69.9515	189	69.9515	194
69.9943	142	69.9943	139	69.9943	171	69.9943	178	69.9943	199	69.9943	186	69.9943	183	69.9943	199	69.9943	173
70.037	126	70.037	170	70.037	195	70.037	180	70.037	186	70.037	180	70.037	167	70.037	186	70.037	164
70.0798	107	70.0798	157	70.0798	172	70.0798	173	70.0798	188	70.0798	196	70.0798	188	70.0798	188	70.0798	199
70.1226	128	70.1226	126	70.1226	191	70.1226	190	70.1226	183	70.1226	180	70.1226	210	70.1226	183	70.1226	190
70.1653	119	70.1653	155	70.1653	163	70.1653	168	70.1653	182	70.1653	170	70.1653	178	70.1653	182	70.1653	194
70.2081	125	70.2081	152	70.2081	195	70.2081	173	70.2081	176	70.2081	161	70.2081	173	70.2081	176	70.2081	186
70.2508	120	70.2508	178	70.2508	185	70.2508	187	70.2508	201	70.2508	191	70.2508	192	70.2508	201	70.2508	175
70.2936	130	70.2936	142	70.2936	178	70.2936	170	70.2936	179	70.2936	183	70.2936	187	70.2936	179	70.2936	192
70.3364	137	70.3364	144	70.3364	172	70.3364	186	70.3364	176	70.3364	186	70.3364	202	70.3364	176	70.3364	196
70.3791	119	70.3791	141	70.3791	160	70.3791	181	70.3791	199	70.3791	162	70.3791	178	70.3791	199	70.3791	211
70.4219	127	70.4219	159	70.4219	188	70.4219	170	70.4219	197	70.4219	187	70.4219	164	70.4219	197	70.4219	201
70.4646	117	70.4646	139	70.4646	178	70.4646	158	70.4646	210	70.4646	164	70.4646	187	70.4646	210	70.4646	176
70.5074	124	70.5074	140	70.5074	161	70.5074	198	70.5074	190	70.5074	185	70.5074	206	70.5074	190	70.5074	203
70.5502	115	70.5502	166	70.5502	189	70.5502	176	70.5502	202	70.5502	159	70.5502	164	70.5502	202	70.5502	189
70.5929	118	70.5929	155	70.5929	185	70.5929	191	70.5929	187	70.5929	183	70.5929	189	70.5929	187	70.5929	193
70.6357	128	70.6357	160	70.6357	172	70.6357	164	70.6357	174	70.6357	180	70.6357	185	70.6357	174	70.6357	216
70.6785	135	70.6785	146	70.6785	173	70.6785	187	70.6785	166	70.6785	195	70.6785	200	70.6785	166	70.6785	186
70.7212	118	70.7212	121	70.7212	154	70.7212	179	70.7212	212	70.7212	155	70.7212	201	70.7212	212	70.7212	196
70.764	117	70.764	158	70.764	197	70.764	178	70.764	164	70.764	175	70.764	181	70.764	164	70.764	182
70.8067	155	70.8067	145	70.8067	166	70.8067	176	70.8067	198	70.8067	173	70.8067	189	70.8067	198	70.8067	209
70.8495	119	70.8495	136	70.8495	157	70.8495	168	70.8495	198	70.8495	169	70.8495	176	70.8495	198	70.8495	167
70.8923	133	70.8923	151	70.8923	169	70.8923	174	70.8923	174	70.8923	198	70.8923	162	70.8923	174	70.8923	215
70.935	110	70.935	152	70.935	174	70.935	197	70.935	179	70.935	184	70.935	162	70.935	179	70.935	156
70.9778	115	70.9778	131	70.9778	178	70.9778	171	70.9778	165	70.9778	184	70.9778	167	70.9778	165	70.9778	166
71.0205	126	71.0205	150	71.0205	191	71.0205	171	71.0205	185	71.0205	205	71.0205	188	71.0205	185	71.0205	210
71.0633	139	71.0633	157	71.0633	170	71.0633	166	71.0633	198	71.0633	208	71.0633	175	71.0633	198	71.0633	183
71.1061	115	71.1061	146	71.1061	180	71.1061	175	71.1061	171	71.1061	207	71.1061	181	71.1061	171	71.1061	213
71.1488	131	71.1488	146	71.1488	172	71.1488	174	71.1488	179	71.1488	186	71.1488	164	71.1488	179	71.1488	199
71.1916	109	71.1916	125	71.1916	170	71.1916	163	71.1916	182	71.1916	168	71.1916	179	71.1916	182	71.1916	195
71.2344	111	71.2344	130	71.2344	185	71.2344	168	71.2344	162	71.2344	168	71.2344	188	71.2344	162	71.2344	197
71.2771	129	71.2771	152	71.2771	177	71.2771	163	71.2771	171	71.2771	170	71.2771	170	71.2771	171	71.2771	190
71.3199	124	71.3199	148	71.3199	162	71.3199	185	71.3199	199	71.3199	201	71.3199	176	71.3199	199	71.3199	188
71.3626	128	71.3626	165	71.3626	171	71.3626	150	71.3626	163	71.3626	182	71.3626	178	71.3626	163	71.3626	175
71.4054	122	71.4054	135	71.4054	164	71.4054	183	71.4054	160	71.4054	190	71.4054	190	71.4054	160	71.4054	179
71.4482	106	71.4482	144	71.4482	191	71.4482	190	71.4482	189	71.4482	194	71.4482	179	71.4482	189	71.4482	167
71.4909	103	71.4909	136	71.4909	207	71.4909	182	71.4909	167	71.4909	185	71.4909	177	71.4909	167	71.4909	179
71.5337	117	71.5337	155	71.5337	168	71.5337	175	71.5337	172	71.5337	167	71.5337	186	71.5337	172	71.5337	182
71.5764	117	71.5764	140	71.5764	164	71.5764	179	71.5764	177	71.5764	174	71.5764	183	71.5764	177	71.5764	194
71.6192	124	71.6192	147	71.6192	169	71.6192	187	71.6192	158	71.6192	174	71.6192	156	71.6192	158	71.6192	178
71.662	113	71.662	167	71.662	158	71.662	172	71.662	194	71.662	177	71.662	153	71.662	194	71.662	156
71.7047	109	71.7047	155	71.7047	160	71.7047	182	71.7047	169	71.7047	174	71.7047	192	71.7047	169	71.7047	179
71.7475	108	71.7475	154	71.7475	158	71.7475	167	71.7475	179	71.7475	188	71.7475	152	71.7475	179	71.7475	172
71.7903	119	71.7903	150	71.7903	190	71.7903	179	71.7903	184	71.7903	181	71.7903	185	71.7903	184	71.7903	185
71.833	131	71.833	152	71.833	191	71.833	183	71.833	192	71.833	185	71.833	169	71.833	192	71.833	186
71.8758	143	71.8758	137	71.8758	166	71.8758	165	71.8758	174	71.8758	196	71.8758	152	71.8758	174	71.8758	171
71.9185	140	71.9185	145	71.9185	177	71.9185	155	71.9185	191	71.9185	176	71.9185	169	71.9185	191	71.9185	203
71.9613	111	71.9613	155	71.9613	160	71.9613	183	71.9613	162	71.9613	192	71.9613	198	71.9613	162	71.9613	182
72.0041	118	72.0041	154	72.0041	159	72.0041	167	72.0041	176	72.0041	198	72.0041	153	72.0041	176	72.0041	202
72.0468	106	72.0468	144	72.0468	180	72.0468	154	72.0468	189	72.0468	155	72.0468	160	72.0468	189	72.0468	183
72.0896	138	72.0896	152	72.0896	166	72.0896	165	72.0896	173	72.0896	185	72.0896	160	72.0896	173	72.0896	190
72.1323	113	72.1323	169	72.1323	188	72.1323	174	72.1323	172	72.1323	187	72.1323	172	72.1323	172	72.1323	209
72.1751	135	72.1751	162	72.1751	169	72.1751	181	72.1751	170	72.1751	178	72.1751	186	72.1751	170	72.1751	191
72.2179	117	72.2179	156	72.2179	167	72.2179	159	72.2179	182	72.2179	193	72.2179	171	72.2179	182	72.2179	178
72.2606	125	72.2606	181	72.2606	171	72.2606	181	72.2606	182	72.2606	194	72.2606	156	72.2606	182	72.2606	176
72.3034	130	72.3034	152	72.3034	182	72.3034	161	72.3034	202	72.3034	151	72.3034	179	72.3034	202	72.3034	184
72.3461	119	72.3461	155	72.3461	156	72.3461	172	72.3461	188	72.3461	156	72.3461	162	72.3461	188	72.3461	178
72.3889	124	72.3889	125	72.3889	159	72.3889	174	72.3889	171	72.3889	172	72.3889	157	72.3889	171	72.3889	195
72.4317	130	72.4317	156	72.4317	191	72.4317	190	72.4317	167	72.4317	160	72.4317	199	72.4317	167	72.4317	174
72.4744	131	72.4744	157	72.4744	164	72.4744	191	72.4744	171	72.4744	179	72.4744	165	72.4744	171	72.4744	189
72.5172	114	72.5172	152	72.5172	186	72.5172	162	72.5172	169	72.5172	169	72.5172	171	72.5172	169	72.5172	179
72.56	141	72.56	160	72.56	171	72.56	172	72.56	190	72.56	176	72.56	180	72.56	190	72.56	182
72.6027	143	72.6027	151	72.6027	185	72.6027	174	72.6027	185	72.6027	170	72.6027	183	72.6027	185	72.6027	195
72.6455	147	72.6455	124	72.6455	175	72.6455	163	72.6455	171	72.6455	160	72.6455	188	72.6455	171	72.6455	182
72.6882	126	72.6882	129	72.6882	157	72.6882	185	72.6882	164	72.6882	189	72.6882	159	72.6882	164	72.6882	203
72.731	116	72.731	139	72.731	155	72.731	154	72.731	193	72.731	166	72.731	150	72.731	193	72.731	171
72.7738	121	72.7738	149	72.7738	139	72.7738	196	72.7738	200	72.7738	172	72.7738	164	72.7738	200	72.7738	180
72.8165	115	72.8165	139	72.8165	160	72.8165	187	72.8165	176	72.8165	149	72.8165	184	72.8165	176	72.8165	161
72.8593	101	72.8593	120	72.8593	167	72.8593	156	72.8593	170	72.8593	159	72.8593	153	72.8593	170	72.8593	204
72.902	118	72.902	138	72.902	166	72.902	162	72.902	184	72.902	179	72.902	170	72.902	184	72.902	174
72.9448	127	72.9448	143	72.9448	175	72.9448	165	72.9448	164	72.9448	180	72.9448	166	72.9448	164	72.9448	175
72.9876	119	72.9876	138	72.9876	167	72.9876	159	72.9876	190	72.9876	179	72.9876	168	72.9876	190	72.9876	180
73.0303	112	73.0303	152	73.0303	190	73.0303	177	73.0303	167	73.0303	195	73.0303	157	73.0303	167	73.0303	179
73.0731	109	73.0731	147	73.0731	164	73.0731	173	73.0731	140	73.0731	162	73.0731	155	73.0731	140	73.0731	165
73.1159	143	73.1159	162	73.1159	177	73.1159	173	73.1159	189	73.1159	173	73.1159	175	73.1159	189	73.1159	166
73.1586	151	73.1586	170	73.1586	173	73.1586	181	73.1586	165	73.1586	179	73.1586	174	73.1586	165	73.1586	178
73.2014	148	73.2014	146	73.2014	187	73.2014	165	73.2014	177	73.2014	171	73.2014	187	73.2014	177	73.2014	140
73.2441	144	73.2441	168	73.2441	190	73.2441	154	73.2441	201	73.2441	174	73.2441	182	73.2441	201	73.2441	173
73.2869	163	73.2869	166	73.2869	190	73.2869	166	73.2869	178	73.2869	166	73.2869	195	73.2869	178	73.2869	152
73.3297	180	73.3297	194	73.3297	148	73.3297	185	73.3297	178	73.3297	191	73.3297	160	73.3297	178	73.3297	192
73.3724	204	73.3724	181	73.3724	181	73.3724	175	73.3724	199	73.3724	178	73.3724	153	73.3724	199	73.3724	170
73.4152	218	73.4152	194	73.4152	155	73.4152	167	73.4152	166	73.4152	178	73.4152	162	73.4152	166	73.4152	188
73.4579	229	73.4579	205	73.4579	201	73.4579	156	73.4579	160	73.4579	175	73.4579	160	73.4579	160	73.4579	191
73.5007	228	73.5007	228	73.5007	187	73.5007	162	73.5007	180	73.5007	156	73.5007	174	73.5007	180	73.5007	170
73.5435	195	73.5435	212	73.5435	158	73.5435	156	73.5435	183	73.5435	190	73.5435	137	73.5435	183	73.5435	156
73.5862	193	73.5862	216	73.5862	185	73.5862	156	73.5862	188	73.5862	190	73.5862	176	73.5862	188	73.5862	164
73.629	176	73.629	177	73.629	160	73.629	179	73.629	171	73.629	148	73.629	145	73.629	171	73.629	162
73.6718	202	73.6718	154	73.6718	188	73.6718	171	73.6718	161	73.6718	152	73.6718	171	73.6718	161	73.6718	147
73.7145	185	73.7145	180	73.7145	179	73.7145	165	73.7145	163	73.7145	182	73.7145	170	73.7145	163	73.7145	186
73.7573	171	73.7573	189	73.7573	155	73.7573	164	73.7573	190	73.7573	171	73.7573	150	73.7573	190	73.7573	167
73.8	139	73.8	176	73.8	203	73.8	160	73.8	170	73.8	166	73.8	167	73.8	170	73.8	160
73.8428	128	73.8428	165	73.8428	154	73.8428	160	73.8428	170	73.8428	183	73.8428	193	73.8428	170	73.8428	160
73.8856	127	73.8856	162	73.8856	143	73.8856	128	73.8856	172	73.8856	179	73.8856	159	73.8856	172	73.8856	171
73.9283	114	73.9283	137	73.9283	175	73.9283	159	73.9283	180	73.9283	200	73.9283	153	73.9283	180	73.9283	157
73.9711	124	73.9711	133	73.9711	172	73.9711	159	73.9711	172	73.9711	172	73.9711	153	73.9711	172	73.9711	187
74.0138	123	74.0138	136	74.0138	163	74.0138	162	74.0138	179	74.0138	162	74.0138	166	74.0138	179	74.0138	166
74.0566	114	74.0566	145	74.0566	174	74.0566	153	74.0566	155	74.0566	173	74.0566	162	74.0566	155	74.0566	175
74.0994	121	74.0994	152	74.0994	193	74.0994	164	74.0994	196	74.0994	169	74.0994	149	74.0994	196	74.0994	132
74.1421	135	74.1421	144	74.1421	159	74.1421	166	74.1421	166	74.1421	161	74.1421	168	74.1421	166	74.1421	180
74.1849	112	74.1849	134	74.1849	172	74.1849	158	74.1849	193	74.1849	154	74.1849	200	74.1849	193	74.1849	181
74.2276	145	74.2276	140	74.2276	156	74.2276	147	74.2276	175	74.2276	176	74.2276	150	74.2276	175	74.2276	163
74.2704	109	74.2704	132	74.2704	163	74.2704	172	74.2704	177	74.2704	165	74.2704	202	74.2704	177	74.2704	166
74.3132	125	74.3132	149	74.3132	166	74.3132	160	74.3132	146	74.3132	178	74.3132	160	74.3132	146	74.3132	164
74.3559	113	74.3559	146	74.3559	146	74.3559	157	74.3559	203	74.3559	156	74.3559	163	74.3559	203	74.3559	184
74.3987	107	74.3987	129	74.3987	184	74.3987	134	74.3987	160	74.3987	183	74.3987	189	74.3987	160	74.3987	178
74.4415	98	74.4415	128	74.4415	175	74.4415	144	74.4415	188	74.4415	160	74.4415	157	74.4415	188	74.4415	195
74.4842	103	74.4842	128	74.4842	139	74.4842	166	74.4842	152	74.4842	155	74.4842	152	74.4842	152	74.4842	166
74.527	117	74.527	164	74.527	155	74.527	167	74.527	176	74.527	185	74.527	173	74.527	176	74.527	185
74.5697	133	74.5697	131	74.5697	152	74.5697	153	74.5697	154	74.5697	165	74.5697	179	74.5697	154	74.5697	167
74.6125	148	74.6125	143	74.6125	179	74.6125	146	74.6125	169	74.6125	170	74.6125	196	74.6125	169	74.6125	176
74.6553	112	74.6553	167	74.6553	173	74.6553	168	74.6553	162	74.6553	184	74.6553	151	74.6553	162	74.6553	165
74.698	132	74.698	129	74.698	166	74.698	158	74.698	173	74.698	156	74.698	167	74.698	173	74.698	182
74.7408	90	74.7408	127	74.7408	171	74.7408	161	74.7408	185	74.7408	170	74.7408	174	74.7408	185	74.7408	186
74.7835	117	74.7835	156	74.7835	150	74.7835	183	74.7835	177	74.7835	173	74.7835	166	74.7835	177	74.7835	145
74.8263	118	74.8263	121	74.8263	178	74.8263	161	74.8263	169	74.8263	150	74.8263	149	74.8263	169	74.8263	150
74.8691	120	74.8691	141	74.8691	169	74.8691	168	74.8691	171	74.8691	174	74.8691	179	74.8691	171	74.8691	178
74.9118	99	74.9118	138	74.9118	142	74.9118	149	74.9118	162	74.9118	172	74.9118	150	74.9118	162	74.9118	172
74.9546	124	74.9546	119	74.9546	169	74.9546	164	74.9546	172	74.9546	171	74.9546	147	74.9546	172	74.9546	168
74.9974	163	74.9974	130	74.9974	161	74.9974	134	74.9974	181	74.9974	157	74.9974	159	74.9974	181	74.9974	167
75.0401	138	75.0401	127	75.0401	152	75.0401	159	75.0401	151	75.0401	164	75.0401	179	75.0401	151	75.0401	155
75.0829	133	75.0829	158	75.0829	155	75.0829	150	75.0829	174	75.0829	163	75.0829	173	75.0829	174	75.0829	182
75.1256	130	75.1256	149	75.1256	181	75.1256	175	75.1256	165	75.1256	169	75.1256	159	75.1256	165	75.1256	159
75.1684	154	75.1684	163	75.1684	149	75.1684	149	75.1684	149	75.1684	175	75.1684	162	75.1684	149	75.1684	182
75.2112	157	75.2112	161	75.2112	166	75.2112	165	75.2112	180	75.2112	150	75.2112	159	75.2112	180	75.2112	158
75.2539	150	75.2539	154	75.2539	157	75.2539	148	75.2539	190	75.2539	140	75.2539	158	75.2539	190	75.2539	179
75.2967	159	75.2967	159	75.2967	158	75.2967	162	75.2967	166	75.2967	169	75.2967	160	75.2967	166	75.2967	183
75.3394	209	75.3394	160	75.3394	173	75.3394	131	75.3394	178	75.3394	138	75.3394	173	75.3394	178	75.3394	185
75.3822	181	75.3822	177	75.3822	162	75.3822	152	75.3822	188	75.3822	159	75.3822	174	75.3822	188	75.3822	166
75.425	213	75.425	182	75.425	162	75.425	163	75.425	161	75.425	169	75.425	178	75.425	161	75.425	167
75.4677	212	75.4677	203	75.4677	135	75.4677	160	75.4677	151	75.4677	192	75.4677	161	75.4677	151	75.4677	170
75.5105	210	75.5105	183	75.5105	164	75.5105	179	75.5105	158	75.5105	210	75.5105	161	75.5105	158	75.5105	176
75.5532	266	75.5532	243	75.5532	193	75.5532	170	75.5532	169	75.5532	152	75.5532	148	75.5532	169	75.5532	186
75.596	296	75.596	246	75.596	165	75.596	141	75.596	169	75.596	174	75.596	180	75.596	169	75.596	193
75.6388	300	75.6388	268	75.6388	178	75.6388	162	75.6388	174	75.6388	177	75.6388	170	75.6388	174	75.6388	157
75.6815	286	75.6815	268	75.6815	159	75.6815	168	75.6815	167	75.6815	183	75.6815	157	75.6815	167	75.6815	181
75.7243	257	75.7243	235	75.7243	162	75.7243	168	75.7243	166	75.7243	165	75.7243	146	75.7243	166	75.7243	161
75.7671	259	75.7671	220	75.7671	163	75.7671	141	75.7671	154	75.7671	174	75.7671	170	75.7671	154	75.7671	149
75.8098	254	75.8098	185	75.8098	180	75.8098	180	75.8098	170	75.8098	162	75.8098	162	75.8098	170	75.8098	188
75.8526	204	75.8526	214	75.8526	158	75.8526	160	75.8526	159	75.8526	170	75.8526	158	75.8526	159	75.8526	162
75.8953	177	75.8953	232	75.8953	195	75.8953	164	75.8953	147	75.8953	151	75.8953	189	75.8953	147	75.8953	174
75.9381	171	75.9381	175	75.9381	175	75.9381	166	75.9381	162	75.9381	142	75.9381	147	75.9381	162	75.9381	177
75.9809	154	75.9809	198	75.9809	157	75.9809	164	75.9809	175	75.9809	152	75.9809	171	75.9809	175	75.9809	182
76.0236	131	76.0236	149	76.0236	188	76.0236	152	76.0236	180	76.0236	170	76.0236	174	76.0236	180	76.0236	191
76.0664	120	76.0664	141	76.0664	164	76.0664	161	76.0664	165	76.0664	151	76.0664	164	76.0664	165	76.0664	158
76.1091	138	76.1091	132	76.1091	170	76.1091	153	76.1091	181	76.1091	141	76.1091	157	76.1091	181	76.1091	164
76.1519	121	76.1519	146	76.1519	163	76.1519	177	76.1519	184	76.1519	153	76.1519	170	76.1519	184	76.1519	173
76.1947	105	76.1947	146	76.1947	163	76.1947	148	76.1947	161	76.1947	166	76.1947	162	76.1947	161	76.1947	149
76.2374	106	76.2374	148	76.2374	168	76.2374	156	76.2374	179	76.2374	170	76.2374	167	76.2374	179	76.2374	145
76.2802	117	76.2802	152	76.2802	179	76.2802	160	76.2802	169	76.2802	147	76.2802	157	76.2802	169	76.2802	144
76.323	127	76.323	129	76.323	150	76.323	154	76.323	162	76.323	164	76.323	143	76.323	162	76.323	167
76.3657	115	76.3657	158	76.3657	151	76.3657	185	76.3657	183	76.3657	157	76.3657	165	76.3657	183	76.3657	166
76.4085	107	76.4085	125	76.4085	150	76.4085	161	76.4085	187	76.4085	149	76.4085	149	76.4085	187	76.4085	164
76.4512	104	76.4512	127	76.4512	133	76.4512	144	76.4512	145	76.4512	150	76.4512	162	76.4512	145	76.4512	174
76.494	134	76.494	148	76.494	155	76.494	159	76.494	184	76.494	148	76.494	174	76.494	184	76.494	156
76.5368	123	76.5368	139	76.5368	177	76.5368	148	76.5368	165	76.5368	151	76.5368	155	76.5368	165	76.5368	159
76.5795	131	76.5795	132	76.5795	171	76.5795	147	76.5795	149	76.5795	136	76.5795	146	76.5795	149	76.5795	152
76.6223	116	76.6223	143	76.6223	156	76.6223	176	76.6223	193	76.6223	173	76.6223	157	76.6223	193	76.6223	161
76.665	132	76.665	129	76.665	167	76.665	151	76.665	171	76.665	150	76.665	161	76.665	171	76.665	156
76.7078	106	76.7078	147	76.7078	170	76.7078	141	76.7078	154	76.7078	178	76.7078	141	76.7078	154	76.7078	133
76.7506	134	76.7506	135	76.7506	153	76.7506	152	76.7506	163	76.7506	181	76.7506	162	76.7506	163	76.7506	173
76.7933	137	76.7933	158	76.7933	167	76.7933	148	76.7933	174	76.7933	162	76.7933	138	76.7933	174	76.7933	129
76.8361	117	76.8361	138	76.8361	151	76.8361	149	76.8361	165	76.8361	138	76.8361	152	76.8361	165	76.8361	158
76.8789	133	76.8789	142	76.8789	145	76.8789	146	76.8789	153	76.8789	141	76.8789	127	76.8789	153	76.8789	148
76.9216	122	76.9216	148	76.9216	157	76.9216	151	76.9216	159	76.9216	171	76.9216	146	76.9216	159	76.9216	168
76.9644	145	76.9644	126	76.9644	179	76.9644	144	76.9644	158	76.9644	157	76.9644	170	76.9644	158	76.9644	144
77.0071	119	77.0071	136	77.0071	132	77.0071	157	77.0071	166	77.0071	165	77.0071	142	77.0071	166	77.0071	163
77.0499	144	77.0499	130	77.0499	163	77.0499	169	77.0499	173	77.0499	164	77.0499	161	77.0499	173	77.0499	157
77.0927	110	77.0927	138	77.0927	162	77.0927	168	77.0927	166	77.0927	150	77.0927	169	77.0927	166	77.0927	188
77.1354	116	77.1354	157	77.1354	152	77.1354	156	77.1354	161	77.1354	168	77.1354	162	77.1354	161	77.1354	162
77.1782	130	77.1782	158	77.1782	146	77.1782	159	77.1782	161	77.1782	168	77.1782	139	77.1782	161	77.1782	166
77.2209	142	77.2209	154	77.2209	166	77.2209	127	77.2209	173	77.2209	161	77.2209	181	77.2209	173	77.2209	155
77.2637	154	77.2637	167	77.2637	164	77.2637	144	77.2637	183	77.2637	152	77.2637	161	77.2637	183	77.2637	161
77.3065	165	77.3065	158	77.3065	176	77.3065	151	77.3065	161	77.3065	153	77.3065	168	77.3065	161	77.3065	185
77.3492	138	77.3492	160	77.3492	179	77.3492	162	77.3492	172	77.3492	139	77.3492	172	77.3492	172	77.3492	147
77.392	190	77.392	163	77.392	160	77.392	151	77.392	177	77.392	168	77.392	152	77.392	177	77.392	142
77.4347	155	77.4347	152	77.4347	164	77.4347	170	77.4347	139	77.4347	163	77.4347	172	77.4347	139	77.4347	163
77.4775	173	77.4775	173	77.4775	140	77.4775	162	77.4775	146	77.4775	136	77.4775	159	77.4775	146	77.4775	161
77.5203	192	77.5203	191	77.5203	148	77.5203	143	77.5203	146	77.5203	172	77.5203	170	77.5203	146	77.5203	165
77.563	164	77.563	173	77.563	139	77.563	167	77.563	167	77.563	146	77.563	152	77.563	167	77.563	164
77.6058	175	77.6058	178	77.6058	148	77.6058	170	77.6058	154	77.6058	168	77.6058	161	77.6058	154	77.6058	157
77.6486	173	77.6486	180	77.6486	151	77.6486	133	77.6486	152	77.6486	162	77.6486	162	77.6486	152	77.6486	147
77.6913	183	77.6913	179	77.6913	185	77.6913	158	77.6913	176	77.6913	138	77.6913	166	77.6913	176	77.6913	181
77.7341	175	77.7341	190	77.7341	146	77.7341	142	77.7341	145	77.7341	163	77.7341	166	77.7341	145	77.7341	147
77.7768	180	77.7768	162	77.7768	157	77.7768	138	77.7768	154	77.7768	153	77.7768	159	77.7768	154	77.7768	154
77.8196	164	77.8196	166	77.8196	167	77.8196	155	77.8196	157	77.8196	152	77.8196	156	77.8196	157	77.8196	144
77.8624	158	77.8624	157	77.8624	171	77.8624	179	77.8624	165	77.8624	154	77.8624	140	77.8624	165	77.8624	168
77.9051	158	77.9051	144	77.9051	140	77.9051	168	77.9051	146	77.9051	182	77.9051	161	77.9051	146	77.9051	144
77.9479	148	77.9479	152	77.9479	161	77.9479	141	77.9479	160	77.9479	165	77.9479	180	77.9479	160	77.9479	166
77.9906	126	77.9906	146	77.9906	152	77.9906	156	77.9906	182	77.9906	159	77.9906	173	77.9906	182	77.9906	143
78.0334	109	78.0334	126	78.0334	137	78.0334	177	78.0334	155	78.0334	159	78.0334	170	78.0334	155	78.0334	161
78.0762	114	78.0762	149	78.0762	157	78.0762	156	78.0762	148	78.0762	137	78.0762	161	78.0762	148	78.0762	135
78.1189	126	78.1189	159	78.1189	157	78.1189	155	78.1189	190	78.1189	144	78.1189	148	78.1189	190	78.1189	157
78.1617	113	78.1617	116	78.1617	155	78.1617	155	78.1617	172	78.1617	161	78.1617	140	78.1617	172	78.1617	136
78.2045	116	78.2045	132	78.2045	148	78.2045	160	78.2045	152	78.2045	145	78.2045	170	78.2045	152	78.2045	141
78.2472	113	78.2472	124	78.2472	143	78.2472	157	78.2472	156	78.2472	133	78.2472	151	78.2472	156	78.2472	149
78.29	110	78.29	114	78.29	130	78.29	138	78.29	159	78.29	131	78.29	159	78.29	159	78.29	159
78.3327	119	78.3327	127	78.3327	156	78.3327	163	78.3327	157	78.3327	135	78.3327	135	78.3327	157	78.3327	154
78.3755	110	78.3755	126	78.3755	178	78.3755	149	78.3755	142	78.3755	144	78.3755	146	78.3755	142	78.3755	160
78.4183	123	78.4183	145	78.4183	160	78.4183	140	78.4183	155	78.4183	148	78.4183	136	78.4183	155	78.4183	159
78.461	86	78.461	131	78.461	140	78.461	164	78.461	130	78.461	152	78.461	127	78.461	130	78.461	159
78.5038	115	78.5038	128	78.5038	147	78.5038	157	78.5038	146	78.5038	160	78.5038	168	78.5038	146	78.5038	147
78.5465	111	78.5465	126	78.5465	152	78.5465	158	78.5465	144	78.5465	148	78.5465	135	78.5465	144	78.5465	159
78.5893	113	78.5893	132	78.5893	142	78.5893	141	78.5893	150	78.5893	134	78.5893	152	78.5893	150	78.5893	158
78.6321	118	78.6321	96	78.6321	148	78.6321	143	78.6321	175	78.6321	152	78.6321	138	78.6321	175	78.6321	134
78.6748	111	78.6748	144	78.6748	147	78.6748	129	78.6748	151	78.6748	152	78.6748	151	78.6748	151	78.6748	158
78.7176	110	78.7176	148	78.7176	146	78.7176	144	78.7176	152	78.7176	147	78.7176	171	78.7176	152	78.7176	148
78.7604	106	78.7604	121	78.7604	148	78.7604	154	78.7604	163	78.7604	179	78.7604	148	78.7604	163	78.7604	167
78.8031	119	78.8031	125	78.8031	166	78.8031	146	78.8031	145	78.8031	147	78.8031	132	78.8031	145	78.8031	157
78.8459	103	78.8459	144	78.8459	134	78.8459	138	78.8459	158	78.8459	145	78.8459	158	78.8459	158	78.8459	136
78.8886	104	78.8886	130	78.8886	166	78.8886	152	78.8886	150	78.8886	160	78.8886	124	78.8886	150	78.8886	141
78.9314	99	78.9314	132	78.9314	169	78.9314	159	78.9314	145	78.9314	160	78.9314	143	78.9314	145	78.9314	163
78.9742	92	78.9742	141	78.9742	166	78.9742	136	78.9742	158	78.9742	142	78.9742	145	78.9742	158	78.9742	151
79.0169	111	79.0169	131	79.0169	136	79.0169	150	79.0169	162	79.0169	158	79.0169	150	79.0169	162	79.0169	126
79.0597	114	79.0597	142	79.0597	158	79.0597	152	79.0597	141	79.0597	156	79.0597	136	79.0597	141	79.0597	182
79.1024	94	79.1024	119	79.1024	143	79.1024	175	79.1024	141	79.1024	143	79.1024	128	79.1024	141	79.1024	149
79.1452	109	79.1452	155	79.1452	135	79.1452	156	79.1452	168	79.1452	170	79.1452	156	79.1452	168	79.1452	156
79.188	83	79.188	134	79.188	145	79.188	180	79.188	144	79.188	138	79.188	144	79.188	144	79.188	131
79.2307	119	79.2307	141	79.2307	142	79.2307	135	79.2307	144	79.2307	126	79.2307	145	79.2307	144	79.2307	136
79.2735	125	79.2735	144	79.2735	139	79.2735	142	79.2735	152	79.2735	130	79.2735	149	79.2735	152	79.2735	144
79.3162	128	79.3162	131	79.3162	153	79.3162	146	79.3162	149	79.3162	147	79.3162	142	79.3162	149	79.3162	157
79.359	121	79.359	149	79.359	159	79.359	116	79.359	165	79.359	147	79.359	159	79.359	165	79.359	151
79.4018	131	79.4018	129	79.4018	140	79.4018	162	79.4018	137	79.4018	146	79.4018	129	79.4018	137	79.4018	138
79.4445	129	79.4445	137	79.4445	155	79.4445	148	79.4445	134	79.4445	150	79.4445	154	79.4445	134	79.4445	143
79.4873	178	79.4873	154	79.4873	164	79.4873	141	79.4873	169	79.4873	151	79.4873	151	79.4873	169	79.4873	152
79.5301	151	79.5301	156	79.5301	158	79.5301	146	79.5301	140	79.5301	162	79.5301	157	79.5301	140	79.5301	163
79.5728	179	79.5728	155	79.5728	143	79.5728	134	79.5728	150	79.5728	128	79.5728	151	79.5728	150	79.5728	150
79.6156	166	79.6156	158	79.6156	134	79.6156	151	79.6156	159	79.6156	143	79.6156	143	79.6156	159	79.6156	148
79.6583	196	79.6583	173	79.6583	141	79.6583	131	79.6583	165	79.6583	133	79.6583	156	79.6583	165	79.6583	151
79.7011	205	79.7011	201	79.7011	151	79.7011	145	79.7011	136	79.7011	155	79.7011	146	79.7011	136	79.7011	168
79.7439	234	79.7439	190	79.7439	164	79.7439	146	79.7439	132	79.7439	162	79.7439	148	79.7439	132	79.7439	157
79.7866	256	79.7866	234	79.7866	158	79.7866	144	79.7866	153	79.7866	140	79.7866	155	79.7866	153	79.7866	161
79.8294	301	79.8294	244	79.8294	139	79.8294	150	79.8294	145	79.8294	137	79.8294	128	79.8294	145	79.8294	149
79.8721	300	79.8721	234	79.8721	189	79.8721	120	79.8721	123	79.8721	156	79.8721	157	79.8721	123	79.8721	178
79.9149	258	79.9149	254	79.9149	142	79.9149	154	79.9149	123	79.9149	134	79.9149	139	79.9149	123	79.9149	133
79.9577	254	79.9577	231	79.9577	154	79.9577	149	79.9577	144	79.9577	148	79.9577	145	79.9577	144	79.9577	148
80.0004	238	80.0004	226	80.0004	140	80.0004	130	80.0004	162	80.0004	163	80.0004	127	80.0004	162	80.0004	160
80.0432	225	80.0432	202	80.0432	148	80.0432	145	80.0432	148	80.0432	132	80.0432	155	80.0432	148	80.0432	143
80.086	218	80.086	197	80.086	164	80.086	135	80.086	152	80.086	150	80.086	137	80.086	152	80.086	139
80.1287	205	80.1287	202	80.1287	156	80.1287	134	80.1287	130	80.1287	140	80.1287	165	80.1287	130	80.1287	141
80.1715	198	80.1715	193	80.1715	144	80.1715	128	80.1715	147	80.1715	163	80.1715	153	80.1715	147	80.1715	147
80.2142	179	80.2142	162	80.2142	123	80.2142	135	80.2142	143	80.2142	155	80.2142	149	80.2142	143	80.2142	145
80.257	136	80.257	160	80.257	131	80.257	123	80.257	139	80.257	150	80.257	128	80.257	139	80.257	130
80.2998	114	80.2998	152	80.2998	127	80.2998	143	80.2998	119	80.2998	131	80.2998	150	80.2998	119	80.2998	121
80.3425	109	80.3425	135	80.3425	146	80.3425	131	80.3425	155	80.3425	153	80.3425	159	80.3425	155	80.3425	122
80.3853	135	80.3853	148	80.3853	146	80.3853	122	80.3853	158	80.3853	139	80.3853	128	80.3853	158	80.3853	153
80.428	119	80.428	134	80.428	166	80.428	123	80.428	154	80.428	163	80.428	146	80.428	154	80.428	144
80.4708	104	80.4708	142	80.4708	145	80.4708	138	80.4708	145	80.4708	138	80.4708	157	80.4708	145	80.4708	129
80.5136	118	80.5136	121	80.5136	158	80.5136	154	80.5136	128	80.5136	149	80.5136	144	80.5136	128	80.5136	138
80.5563	104	80.5563	132	80.5563	149	80.5563	156	80.5563	140	80.5563	130	80.5563	135	80.5563	140	80.5563	145
80.5991	122	80.5991	131	80.5991	140	80.5991	148	80.5991	149	80.5991	171	80.5991	136	80.5991	149	80.5991	141
80.6419	126	80.6419	141	80.6419	127	80.6419	135	80.6419	125	80.6419	154	80.6419	128	80.6419	125	80.6419	154
80.6846	143	80.6846	134	80.6846	149	80.6846	147	80.6846	129	80.6846	156	80.6846	156	80.6846	129	80.6846	145
80.7274	143	80.7274	147	80.7274	142	80.7274	134	80.7274	125	80.7274	156	80.7274	114	80.7274	125	80.7274	130
80.7701	128	80.7701	149	80.7701	143	80.7701	135	80.7701	142	80.7701	121	80.7701	149	80.7701	142	80.7701	132
80.8129	136	80.8129	163	80.8129	162	80.8129	125	80.8129	134	80.8129	137	80.8129	133	80.8129	134	80.8129	135
80.8557	140	80.8557	161	80.8557	140	80.8557	143	80.8557	142	80.8557	126	80.8557	123	80.8557	142	80.8557	147
80.8984	167	80.8984	136	80.8984	150	80.8984	134	80.8984	143	80.8984	125	80.8984	151	80.8984	143	80.8984	144
80.9412	177	80.9412	163	80.9412	134	80.9412	128	80.9412	131	80.9412	139	80.9412	146	80.9412	131	80.9412	141
80.9839	235	80.9839	142	80.9839	153	80.9839	158	80.9839	144	80.9839	150	80.9839	154	80.9839	144	80.9839	156
81.0267	235	81.0267	205	81.0267	133	81.0267	150	81.0267	157	81.0267	132	81.0267	129	81.0267	157	81.0267	149
81.0695	294	81.0695	206	81.0695	159	81.0695	146	81.0695	171	81.0695	143	81.0695	136	81.0695	171	81.0695	129
81.1122	288	81.1122	240	81.1122	147	81.1122	147	81.1122	131	81.1122	164	81.1122	132	81.1122	131	81.1122	144
81.155	315	81.155	251	81.155	145	81.155	121	81.155	140	81.155	134	81.155	118	81.155	140	81.155	157
81.1977	331	81.1977	255	81.1977	163	81.1977	141	81.1977	139	81.1977	155	81.1977	166	81.1977	139	81.1977	132
81.2405	318	81.2405	250	81.2405	159	81.2405	127	81.2405	140	81.2405	153	81.2405	147	81.2405	140	81.2405	145
81.2833	284	81.2833	233	81.2833	149	81.2833	116	81.2833	119	81.2833	159	81.2833	134	81.2833	119	81.2833	143
81.326	296	81.326	257	81.326	149	81.326	130	81.326	123	81.326	142	81.326	160	81.326	123	81.326	151
81.3688	313	81.3688	259	81.3688	157	81.3688	135	81.3688	162	81.3688	152	81.3688	148	81.3688	162	81.3688	135
81.4116	337	81.4116	266	81.4116	152	81.4116	137	81.4116	144	81.4116	132	81.4116	128	81.4116	144	81.4116	120
81.4543	344	81.4543	266	81.4543	175	81.4543	124	81.4543	144	81.4543	140	81.4543	150	81.4543	144	81.4543	131
81.4971	321	81.4971	253	81.4971	169	81.4971	140	81.4971	149	81.4971	155	81.4971	163	81.4971	149	81.4971	141
81.5398	305	81.5398	273	81.5398	152	81.5398	136	81.5398	149	81.5398	133	81.5398	178	81.5398	149	81.5398	153
81.5826	243	81.5826	183	81.5826	155	81.5826	145	81.5826	124	81.5826	143	81.5826	197	81.5826	124	81.5826	143
81.6254	216	81.6254	192	81.6254	144	81.6254	125	81.6254	143	81.6254	142	81.6254	163	81.6254	143	81.6254	135
81.6681	166	81.6681	174	81.6681	159	81.6681	131	81.6681	121	81.6681	117	81.6681	156	81.6681	121	81.6681	146
81.7109	197	81.7109	170	81.7109	139	81.7109	122	81.7109	141	81.7109	135	81.7109	161	81.7109	141	81.7109	137
81.7536	162	81.7536	168	81.7536	150	81.7536	158	81.7536	128	81.7536	132	81.7536	158	81.7536	128	81.7536	145
81.7964	131	81.7964	168	81.7964	134	81.7964	133	81.7964	151	81.7964	126	81.7964	160	81.7964	151	81.7964	147
81.8392	133	81.8392	155	81.8392	128	81.8392	130	81.8392	150	81.8392	142	81.8392	177	81.8392	150	81.8392	136
81.8819	137	81.8819	152	81.8819	136	81.8819	135	81.8819	140	81.8819	102	81.8819	152	81.8819	140	81.8819	132
81.9247	110	81.9247	125	81.9247	128	81.9247	137	81.9247	139	81.9247	112	81.9247	137	81.9247	139	81.9247	129
81.9675	103	81.9675	119	81.9675	143	81.9675	122	81.9675	147	81.9675	104	81.9675	139	81.9675	147	81.9675	117
82.0102	101	82.0102	137	82.0102	138	82.0102	121	82.0102	118	82.0102	145	82.0102	126	82.0102	118	82.0102	139
82.053	130	82.053	102	82.053	130	82.053	147	82.053	133	82.053	142	82.053	141	82.053	133	82.053	131
82.0957	101	82.0957	119	82.0957	138	82.0957	121	82.0957	151	82.0957	123	82.0957	120	82.0957	151	82.0957	128
82.1385	103	82.1385	106	82.1385	121	82.1385	133	82.1385	131	82.1385	146	82.1385	132	82.1385	131	82.1385	151
82.1813	86	82.1813	105	82.1813	141	82.1813	144	82.1813	130	82.1813	131	82.1813	150	82.1813	130	82.1813	159
82.224	83	82.224	96	82.224	139	82.224	117	82.224	124	82.224	120	82.224	120	82.224	124	82.224	123
82.2668	96	82.2668	138	82.2668	127	82.2668	118	82.2668	122	82.2668	129	82.2668	137	82.2668	122	82.2668	119
82.3095	84	82.3095	103	82.3095	131	82.3095	141	82.3095	120	82.3095	151	82.3095	146	82.3095	120	82.3095	118
82.3523	107	82.3523	122	82.3523	141	82.3523	117	82.3523	127	82.3523	130	82.3523	138	82.3523	127	82.3523	151
82.3951	96	82.3951	94	82.3951	135	82.3951	153	82.3951	133	82.3951	136	82.3951	123	82.3951	133	82.3951	129
82.4378	90	82.4378	105	82.4378	138	82.4378	128	82.4378	126	82.4378	135	82.4378	126	82.4378	126	82.4378	127
82.4806	111	82.4806	97	82.4806	116	82.4806	121	82.4806	155	82.4806	116	82.4806	138	82.4806	155	82.4806	127
82.5233	89	82.5233	106	82.5233	122	82.5233	125	82.5233	128	82.5233	141	82.5233	135	82.5233	128	82.5233	110
82.5661	95	82.5661	116	82.5661	135	82.5661	116	82.5661	126	82.5661	125	82.5661	138	82.5661	126	82.5661	140
82.6089	98	82.6089	105	82.6089	113	82.6089	121	82.6089	122	82.6089	123	82.6089	122	82.6089	122	82.6089	123
82.6516	93	82.6516	108	82.6516	126	82.6516	135	82.6516	134	82.6516	126	82.6516	137	82.6516	134	82.6516	132
82.6944	89	82.6944	112	82.6944	151	82.6944	128	82.6944	127	82.6944	141	82.6944	144	82.6944	127	82.6944	137
82.7372	103	82.7372	107	82.7372	120	82.7372	139	82.7372	154	82.7372	123	82.7372	125	82.7372	154	82.7372	136
82.7799	77	82.7799	105	82.7799	130	82.7799	140	82.7799	114	82.7799	130	82.7799	145	82.7799	114	82.7799	145
82.8227	85	82.8227	126	82.8227	129	82.8227	116	82.8227	144	82.8227	121	82.8227	127	82.8227	144	82.8227	108
82.8654	90	82.8654	103	82.8654	127	82.8654	112	82.8654	114	82.8654	123	82.8654	148	82.8654	114	82.8654	130
82.9082	92	82.9082	91	82.9082	114	82.9082	143	82.9082	127	82.9082	132	82.9082	135	82.9082	127	82.9082	130
82.951	103	82.951	116	82.951	136	82.951	117	82.951	120	82.951	126	82.951	122	82.951	120	82.951	143
82.9937	90	82.9937	117	82.9937	126	82.9937	129	82.9937	137	82.9937	122	82.9937	129	82.9937	137	82.9937	135
83.0365	89	83.0365	112	83.0365	107	83.0365	118	83.0365	142	83.0365	138	83.0365	113	83.0365	142	83.0365	121
83.0792	94	83.0792	103	83.0792	118	83.0792	118	83.0792	137	83.0792	121	83.0792	120	83.0792	137	83.0792	113
83.122	97	83.122	110	83.122	103	83.122	116	83.122	135	83.122	131	83.122	124	83.122	135	83.122	106
83.1648	95	83.1648	108	83.1648	129	83.1648	143	83.1648	143	83.1648	117	83.1648	132	83.1648	143	83.1648	132
83.2075	102	83.2075	117	83.2075	108	83.2075	121	83.2075	128	83.2075	101	83.2075	139	83.2075	128	83.2075	140
83.2503	117	83.2503	128	83.2503	135	83.2503	127	83.2503	118	83.2503	144	83.2503	125	83.2503	118	83.2503	126
83.2931	102	83.2931	130	83.2931	140	83.2931	133	83.2931	106	83.2931	121	83.2931	140	83.2931	106	83.2931	125
83.3358	136	83.3358	125	83.3358	113	83.3358	114	83.3358	128	83.3358	110	83.3358	128	83.3358	128	83.3358	123
83.3786	113	83.3786	130	83.3786	114	83.3786	124	83.3786	160	83.3786	128	83.3786	145	83.3786	160	83.3786	146
83.4213	131	83.4213	134	83.4213	115	83.4213	131	83.4213	144	83.4213	133	83.4213	102	83.4213	144	83.4213	129
83.4641	145	83.4641	136	83.4641	128	83.4641	111	83.4641	109	83.4641	113	83.4641	106	83.4641	109	83.4641	109
83.5069	155	83.5069	146	83.5069	128	83.5069	108	83.5069	127	83.5069	115	83.5069	126	83.5069	127	83.5069	123
83.5496	157	83.5496	125	83.5496	110	83.5496	116	83.5496	133	83.5496	138	83.5496	107	83.5496	133	83.5496	123
83.5924	168	83.5924	133	83.5924	118	83.5924	118	83.5924	128	83.5924	125	83.5924	112	83.5924	128	83.5924	132
83.6351	167	83.6351	143	83.6351	114	83.6351	130	83.6351	123	83.6351	119	83.6351	122	83.6351	123	83.6351	149
83.6779	196	83.6779	153	83.6779	114	83.6779	105	83.6779	139	83.6779	137	83.6779	108	83.6779	139	83.6779	121
83.7207	192	83.7207	146	83.7207	128	83.7207	136	83.7207	146	83.7207	126	83.7207	143	83.7207	146	83.7207	161
83.7634	179	83.7634	167	83.7634	114	83.7634	107	83.7634	122	83.7634	131	83.7634	123	83.7634	122	83.7634	120
83.8062	148	83.8062	176	83.8062	98	83.8062	122	83.8062	124	83.8062	129	83.8062	103	83.8062	124	83.8062	128
83.849	163	83.849	186	83.849	116	83.849	124	83.849	113	83.849	136	83.849	112	83.849	113	83.849	129
83.8917	165	83.8917	162	83.8917	143	83.8917	125	83.8917	127	83.8917	152	83.8917	146	83.8917	127	83.8917	129
83.9345	156	83.9345	131	83.9345	131	83.9345	107	83.9345	134	83.9345	102	83.9345	124	83.9345	134	83.9345	114
83.9772	137	83.9772	141	83.9772	119	83.9772	130	83.9772	112	83.9772	131	83.9772	105	83.9772	112	83.9772	125
84.02	131	84.02	121	84.02	100	84.02	107	84.02	122	84.02	126	84.02	114	84.02	122	84.02	130
84.0628	141	84.0628	149	84.0628	101	84.0628	116	84.0628	109	84.0628	116	84.0628	111	84.0628	109	84.0628	119
84.1055	127	84.1055	145	84.1055	137	84.1055	130	84.1055	124	84.1055	110	84.1055	98	84.1055	124	84.1055	118
84.1483	106	84.1483	150	84.1483	141	84.1483	117	84.1483	118	84.1483	123	84.1483	116	84.1483	118	84.1483	116
84.191	96	84.191	109	84.191	108	84.191	113	84.191	114	84.191	110	84.191	122	84.191	114	84.191	133
84.2338	94	84.2338	103	84.2338	126	84.2338	105	84.2338	125	84.2338	132	84.2338	104	84.2338	125	84.2338	113
84.2766	91	84.2766	93	84.2766	106	84.2766	117	84.2766	131	84.2766	108	84.2766	106	84.2766	131	84.2766	132
84.3193	85	84.3193	118	84.3193	118	84.3193	108	84.3193	129	84.3193	135	84.3193	131	84.3193	129	84.3193	122
84.3621	75	84.3621	111	84.3621	108	84.3621	114	84.3621	120	84.3621	127	84.3621	108	84.3621	120	84.3621	118
84.4048	92	84.4048	115	84.4048	115	84.4048	126	84.4048	143	84.4048	131	84.4048	116	84.4048	143	84.4048	129
84.4476	89	84.4476	99	84.4476	106	84.4476	134	84.4476	136	84.4476	119	84.4476	128	84.4476	136	84.4476	122
84.4904	89	84.4904	98	84.4904	112	84.4904	122	84.4904	131	84.4904	114	84.4904	95	84.4904	131	84.4904	112
84.5331	87	84.5331	117	84.5331	93	84.5331	111	84.5331	111	84.5331	120	84.5331	114	84.5331	111	84.5331	108
84.5759	98	84.5759	102	84.5759	114	84.5759	107	84.5759	126	84.5759	127	84.5759	118	84.5759	126	84.5759	143
84.6187	89	84.6187	97	84.6187	105	84.6187	109	84.6187	107	84.6187	98	84.6187	110	84.6187	107	84.6187	139
84.6614	79	84.6614	113	84.6614	98	84.6614	113	84.6614	102	84.6614	123	84.6614	112	84.6614	102	84.6614	110
84.7042	103	84.7042	110	84.7042	106	84.7042	104	84.7042	122	84.7042	128	84.7042	124	84.7042	122	84.7042	113
84.7469	95	84.7469	92	84.7469	106	84.7469	105	84.7469	137	84.7469	125	84.7469	100	84.7469	137	84.7469	126
84.7897	87	84.7897	97	84.7897	112	84.7897	107	84.7897	112	84.7897	139	84.7897	133	84.7897	112	84.7897	104
84.8325	82	84.8325	113	84.8325	104	84.8325	110	84.8325	108	84.8325	130	84.8325	122	84.8325	108	84.8325	119
84.8752	86	84.8752	108	84.8752	90	84.8752	102	84.8752	122	84.8752	125	84.8752	113	84.8752	122	84.8752	108
84.918	94	84.918	128	84.918	104	84.918	119	84.918	132	84.918	129	84.918	107	84.918	132	84.918	120
84.9607	107	84.9607	112	84.9607	109	84.9607	111	84.9607	113	84.9607	116	84.9607	109	84.9607	113	84.9607	97
85.0035	92	85.0035	106	85.0035	110	85.0035	107	85.0035	114	85.0035	129	85.0035	107	85.0035	114	85.0035	114
85.0463	84	85.0463	102	85.0463	116	85.0463	105	85.0463	125	85.0463	115	85.0463	122	85.0463	125	85.0463	117
85.089	103	85.089	109	85.089	110	85.089	110	85.089	139	85.089	108	85.089	107	85.089	139	85.089	120
85.1318	93	85.1318	94	85.1318	114	85.1318	117	85.1318	141	85.1318	121	85.1318	119	85.1318	141	85.1318	105
85.1746	82	85.1746	95	85.1746	100	85.1746	87	85.1746	142	85.1746	114	85.1746	121	85.1746	142	85.1746	130
85.2173	95	85.2173	103	85.2173	116	85.2173	125	85.2173	99	85.2173	124	85.2173	93	85.2173	99	85.2173	105
85.2601	84	85.2601	115	85.2601	106	85.2601	99	85.2601	116	85.2601	126	85.2601	99	85.2601	116	85.2601	106
85.3028	88	85.3028	92	85.3028	102	85.3028	101	85.3028	107	85.3028	128	85.3028	104	85.3028	107	85.3028	123
85.3456	91	85.3456	104	85.3456	104	85.3456	85	85.3456	114	85.3456	123	85.3456	107	85.3456	114	85.3456	104
85.3884	94	85.3884	101	85.3884	119	85.3884	122	85.3884	115	85.3884	99	85.3884	116	85.3884	115	85.3884	117
85.4311	93	85.4311	82	85.4311	102	85.4311	104	85.4311	124	85.4311	108	85.4311	103	85.4311	124	85.4311	103
85.4739	96	85.4739	74	85.4739	119	85.4739	120	85.4739	108	85.4739	97	85.4739	117	85.4739	108	85.4739	95
85.5166	102	85.5166	101	85.5166	98	85.5166	120	85.5166	124	85.5166	114	85.5166	84	85.5166	124	85.5166	125
85.5594	84	85.5594	79	85.5594	105	85.5594	97	85.5594	109	85.5594	123	85.5594	107	85.5594	109	85.5594	126
85.6022	93	85.6022	83	85.6022	115	85.6022	102	85.6022	115	85.6022	117	85.6022	112	85.6022	115	85.6022	102
85.6449	81	85.6449	98	85.6449	93	85.6449	100	85.6449	106	85.6449	100	85.6449	111	85.6449	106	85.6449	117
85.6877	89	85.6877	94	85.6877	99	85.6877	108	85.6877	125	85.6877	127	85.6877	111	85.6877	125	85.6877	119
85.7305	80	85.7305	93	85.7305	109	85.7305	103	85.7305	119	85.7305	103	85.7305	117	85.7305	119	85.7305	137
85.7732	103	85.7732	91	85.7732	96	85.7732	110	85.7732	121	85.7732	107	85.7732	128	85.7732	121	85.7732	125
85.816	75	85.816	102	85.816	117	85.816	98	85.816	110	85.816	133	85.816	111	85.816	110	85.816	104
85.8587	64	85.8587	94	85.8587	97	85.8587	108	85.8587	123	85.8587	103	85.8587	116	85.8587	123	85.8587	119
85.9015	78	85.9015	91	85.9015	80	85.9015	122	85.9015	120	85.9015	116	85.9015	116	85.9015	120	85.9015	107
85.9443	65	85.9443	97	85.9443	94	85.9443	113	85.9443	123	85.9443	122	85.9443	108	85.9443	123	85.9443	105
85.987	82	85.987	92	85.987	92	85.987	106	85.987	101	85.987	114	85.987	123	85.987	101	85.987	112
86.0298	72	86.0298	99	86.0298	108	86.0298	111	86.0298	112	86.0298	106	86.0298	110	86.0298	112	86.0298	113
86.0725	70	86.0725	99	86.0725	104	86.0725	98	86.0725	108	86.0725	122	86.0725	97	86.0725	108	86.0725	121
86.1153	74	86.1153	89	86.1153	107	86.1153	98	86.1153	128	86.1153	114	86.1153	117	86.1153	128	86.1153	99
86.1581	72	86.1581	63	86.1581	109	86.1581	97	86.1581	131	86.1581	108	86.1581	116	86.1581	131	86.1581	103
86.2008	83	86.2008	74	86.2008	106	86.2008	95	86.2008	137	86.2008	90	86.2008	107	86.2008	137	86.2008	96
86.2436	73	86.2436	72	86.2436	112	86.2436	121	86.2436	116	86.2436	114	86.2436	84	86.2436	116	86.2436	105
86.2863	85	86.2863	89	86.2863	97	86.2863	103	86.2863	118	86.2863	112	86.2863	95	86.2863	118	86.2863	100
86.3291	83	86.3291	90	86.3291	110	86.3291	106	86.3291	112	86.3291	115	86.3291	116	86.3291	112	86.3291	108
86.3719	67	86.3719	87	86.3719	102	86.3719	121	86.3719	124	86.3719	101	86.3719	108	86.3719	124	86.3719	116
86.4146	85	86.4146	87	86.4146	117	86.4146	92	86.4146	108	86.4146	110	86.4146	113	86.4146	108	86.4146	119
86.4574	60	86.4574	80	86.4574	84	86.4574	102	86.4574	123	86.4574	107	86.4574	104	86.4574	123	86.4574	108
86.5002	73	86.5002	79	86.5002	96	86.5002	123	86.5002	102	86.5002	115	86.5002	113	86.5002	102	86.5002	97
86.5429	76	86.5429	103	86.5429	96	86.5429	84	86.5429	109	86.5429	92	86.5429	111	86.5429	109	86.5429	104
86.5857	72	86.5857	94	86.5857	109	86.5857	110	86.5857	110	86.5857	95	86.5857	114	86.5857	110	86.5857	109
86.6284	74	86.6284	76	86.6284	93	86.6284	92	86.6284	119	86.6284	121	86.6284	97	86.6284	119	86.6284	112
86.6712	66	86.6712	94	86.6712	85	86.6712	85	86.6712	102	86.6712	104	86.6712	95	86.6712	102	86.6712	117
86.714	63	86.714	73	86.714	92	86.714	98	86.714	126	86.714	120	86.714	97	86.714	126	86.714	99
86.7567	72	86.7567	80	86.7567	100	86.7567	119	86.7567	84	86.7567	93	86.7567	116	86.7567	84	86.7567	114
86.7995	80	86.7995	102	86.7995	93	86.7995	101	86.7995	108	86.7995	111	86.7995	108	86.7995	108	86.7995	90
86.8422	75	86.8422	68	86.8422	102	86.8422	116	86.8422	118	86.8422	114	86.8422	124	86.8422	118	86.8422	88
86.885	84	86.885	95	86.885	81	86.885	112	86.885	101	86.885	124	86.885	104	86.885	101	86.885	125
86.9278	79	86.9278	92	86.9278	92	86.9278	105	86.9278	121	86.9278	102	86.9278	109	86.9278	121	86.9278	109
86.9705	83	86.9705	97	86.9705	109	86.9705	80	86.9705	107	86.9705	116	86.9705	112	86.9705	107	86.9705	103
87.0133	78	87.0133	91	87.0133	83	87.0133	124	87.0133	98	87.0133	118	87.0133	110	87.0133	98	87.0133	101
87.0561	93	87.0561	88	87.0561	124	87.0561	94	87.0561	113	87.0561	110	87.0561	124	87.0561	113	87.0561	99
87.0988	73	87.0988	89	87.0988	116	87.0988	104	87.0988	95	87.0988	87	87.0988	111	87.0988	95	87.0988	97
87.1416	85	87.1416	109	87.1416	74	87.1416	113	87.1416	116	87.1416	108	87.1416	120	87.1416	116	87.1416	103
87.1843	83	87.1843	103	87.1843	85	87.1843	92	87.1843	103	87.1843	111	87.1843	99	87.1843	103	87.1843	118
87.2271	90	87.2271	91	87.2271	109	87.2271	118	87.2271	117	87.2271	115	87.2271	100	87.2271	117	87.2271	85
87.2699	81	87.2699	100	87.2699	109	87.2699	112	87.2699	112	87.2699	91	87.2699	98	87.2699	112	87.2699	115
87.3126	93	87.3126	103	87.3126	97	87.3126	104	87.3126	102	87.3126	99	87.3126	127	87.3126	102	87.3126	110
87.3554	72	87.3554	88	87.3554	93	87.3554	126	87.3554	117	87.3554	114	87.3554	101	87.3554	117	87.3554	117
87.3981	93	87.3981	97	87.3981	110	87.3981	102	87.3981	121	87.3981	99	87.3981	81	87.3981	121	87.3981	95
87.4409	78	87.4409	122	87.4409	97	87.4409	109	87.4409	104	87.4409	111	87.4409	103	87.4409	104	87.4409	103
87.4837	91	87.4837	113	87.4837	127	87.4837	100	87.4837	106	87.4837	107	87.4837	106	87.4837	106	87.4837	124
87.5264	81	87.5264	101	87.5264	115	87.5264	100	87.5264	97	87.5264	103	87.5264	98	87.5264	97	87.5264	120
87.5692	97	87.5692	96	87.5692	104	87.5692	88	87.5692	108	87.5692	105	87.5692	106	87.5692	108	87.5692	110
87.612	74	87.612	91	87.612	108	87.612	88	87.612	98	87.612	97	87.612	109	87.612	98	87.612	109
87.6547	58	87.6547	77	87.6547	98	87.6547	113	87.6547	98	87.6547	103	87.6547	131	87.6547	98	87.6547	136
87.6975	82	87.6975	87	87.6975	95	87.6975	121	87.6975	105	87.6975	110	87.6975	121	87.6975	105	87.6975	122
87.7402	81	87.7402	92	87.7402	101	87.7402	86	87.7402	104	87.7402	105	87.7402	103	87.7402	104	87.7402	120
87.783	72	87.783	83	87.783	84	87.783	89	87.783	124	87.783	101	87.783	100	87.783	124	87.783	103
87.8258	71	87.8258	77	87.8258	95	87.8258	91	87.8258	97	87.8258	122	87.8258	110	87.8258	97	87.8258	105
87.8685	65	87.8685	94	87.8685	115	87.8685	85	87.8685	120	87.8685	100	87.8685	103	87.8685	120	87.8685	116
87.9113	82	87.9113	91	87.9113	109	87.9113	96	87.9113	105	87.9113	97	87.9113	98	87.9113	105	87.9113	112
87.954	71	87.954	79	87.954	114	87.954	112	87.954	113	87.954	102	87.954	105	87.954	113	87.954	101
87.9968	79	87.9968	95	87.9968	110	87.9968	109	87.9968	115	87.9968	104	87.9968	100	87.9968	115	87.9968	126
88.0396	89	88.0396	66	88.0396	107	88.0396	112	88.0396	114	88.0396	126	88.0396	86	88.0396	114	88.0396	95
88.0823	63	88.0823	72	88.0823	85	88.0823	114	88.0823	112	88.0823	110	88.0823	121	88.0823	112	88.0823	124
88.1251	73	88.1251	87	88.1251	116	88.1251	116	88.1251	110	88.1251	111	88.1251	100	88.1251	110	88.1251	107
88.1678	77	88.1678	68	88.1678	112	88.1678	101	88.1678	111	88.1678	118	88.1678	97	88.1678	111	88.1678	105
88.2106	70	88.2106	80	88.2106	103	88.2106	116	88.2106	128	88.2106	119	88.2106	96	88.2106	128	88.2106	92
88.2534	81	88.2534	82	88.2534	98	88.2534	90	88.2534	93	88.2534	92	88.2534	94	88.2534	93	88.2534	97
88.2961	65	88.2961	89	88.2961	115	88.2961	96	88.2961	124	88.2961	89	88.2961	97	88.2961	124	88.2961	98
88.3389	74	88.3389	95	88.3389	91	88.3389	101	88.3389	88	88.3389	103	88.3389	100	88.3389	88	88.3389	92
88.3817	77	88.3817	79	88.3817	97	88.3817	110	88.3817	104	88.3817	97	88.3817	111	88.3817	104	88.3817	111
88.4244	72	88.4244	76	88.4244	107	88.4244	116	88.4244	106	88.4244	103	88.4244	90	88.4244	106	88.4244	98
88.4672	66	88.4672	83	88.4672	107	88.4672	98	88.4672	116	88.4672	114	88.4672	106	88.4672	116	88.4672	97
88.5099	47	88.5099	98	88.5099	107	88.5099	98	88.5099	100	88.5099	113	88.5099	106	88.5099	100	88.5099	106
88.5527	71	88.5527	95	88.5527	104	88.5527	130	88.5527	109	88.5527	103	88.5527	92	88.5527	109	88.5527	100
88.5955	62	88.5955	123	88.5955	91	88.5955	94	88.5955	106	88.5955	101	88.5955	111	88.5955	106	88.5955	112
88.6382	93	88.6382	94	88.6382	97	88.6382	92	88.6382	87	88.6382	110	88.6382	99	88.6382	87	88.6382	104
88.681	68	88.681	89	88.681	120	88.681	98	88.681	103	88.681	104	88.681	102	88.681	103	88.681	100
88.7237	78	88.7237	116	88.7237	94	88.7237	100	88.7237	106	88.7237	129	88.7237	101	88.7237	106	88.7237	101
88.7665	80	88.7665	92	88.7665	93	88.7665	108	88.7665	120	88.7665	115	88.7665	107	88.7665	120	88.7665	106
88.8093	77	88.8093	90	88.8093	100	88.8093	99	88.8093	119	88.8093	100	88.8093	107	88.8093	119	88.8093	107
88.852	86	88.852	89	88.852	97	88.852	104	88.852	86	88.852	99	88.852	113	88.852	86	88.852	114
88.8948	83	88.8948	97	88.8948	86	88.8948	116	88.8948	98	88.8948	107	88.8948	88	88.8948	98	88.8948	106
88.9376	80	88.9376	83	88.9376	121	88.9376	103	88.9376	102	88.9376	112	88.9376	100	88.9376	102	88.9376	110
88.9803	89	88.9803	83	88.9803	96	88.9803	91	88.9803	102	88.9803	109	88.9803	89	88.9803	102	88.9803	129
89.0231	104	89.0231	97	89.0231	113	89.0231	97	89.0231	111	89.0231	103	89.0231	100	89.0231	111	89.0231	117
89.0658	73	89.0658	80	89.0658	93	89.0658	96	89.0658	102	89.0658	105	89.0658	92	89.0658	102	89.0658	111
89.1086	104	89.1086	88	89.1086	101	89.1086	95	89.1086	80	89.1086	97	89.1086	88	89.1086	80	89.1086	107
89.1514	83	89.1514	80	89.1514	98	89.1514	92	89.1514	111	89.1514	104	89.1514	128	89.1514	111	89.1514	98
89.1941	85	89.1941	101	89.1941	109	89.1941	80	89.1941	115	89.1941	96	89.1941	120	89.1941	115	89.1941	98
89.2369	82	89.2369	93	89.2369	101	89.2369	110	89.2369	107	89.2369	96	89.2369	116	89.2369	107	89.2369	96
89.2796	91	89.2796	90	89.2796	95	89.2796	106	89.2796	112	89.2796	98	89.2796	85	89.2796	112	89.2796	87
89.3224	84	89.3224	72	89.3224	104	89.3224	102	89.3224	103	89.3224	95	89.3224	105	89.3224	103	89.3224	125
89.3652	101	89.3652	95	89.3652	107	89.3652	108	89.3652	98	89.3652	98	89.3652	99	89.3652	98	89.3652	126
89.4079	72	89.4079	78	89.4079	92	89.4079	87	89.4079	96	89.4079	111	89.4079	97	89.4079	96	89.4079	94
89.4507	86	89.4507	81	89.4507	107	89.4507	110	89.4507	88	89.4507	87	89.4507	90	89.4507	88	89.4507	93
89.4934	80	89.4934	92	89.4934	75	89.4934	90	89.4934	93	89.4934	104	89.4934	98	89.4934	93	89.4934	101
89.5362	66	89.5362	98	89.5362	96	89.5362	96	89.5362	98	89.5362	90	89.5362	112	89.5362	98	89.5362	109
89.579	83	89.579	76	89.579	105	89.579	129	89.579	114	89.579	78	89.579	88	89.579	114	89.579	97
89.6217	83	89.6217	98	89.6217	100	89.6217	95	89.6217	103	89.6217	94	89.6217	116	89.6217	103	89.6217	100
89.6645	76	89.6645	83	89.6645	99	89.6645	98	89.6645	93	89.6645	98	89.6645	95	89.6645	93	89.6645	102
89.7073	66	89.7073	90	89.7073	98	89.7073	107	89.7073	94	89.7073	108	89.7073	83	89.7073	94	89.7073	101
89.75	68	89.75	100	89.75	89	89.75	102	89.75	99	89.75	111	89.75	105	89.75	99	89.75	90
89.7928	80	89.7928	86	89.7928	88	89.7928	84	89.7928	104	89.7928	92	89.7928	98	89.7928	104	89.7928	117
89.8355	68	89.8355	71	89.8355	83	89.8355	91	89.8355	100	89.8355	93	89.8355	106	89.8355	100	89.8355	111
89.8783	84	89.8783	91	89.8783	101	89.8783	93	89.8783	111	89.8783	101	89.8783	101	89.8783	111	89.8783	110
89.9211	74	89.9211	92	89.9211	75	89.9211	97	89.9211	106	89.9211	113	89.9211	107	89.9211	106	89.9211	99
89.9638	77	89.9638	84	89.9638	94	89.9638	88	89.9638	106	89.9638	95	89.9638	94	89.9638	106	89.9638	113
90.0066	90	90.0066	80	90.0066	81	90.0066	104	90.0066	95	90.0066	113	90.0066	84	90.0066	95	90.0066	106
