# Supplementary material for: Microwave Vitrification of Uranium Tailings: Microstructure and Mechanical Property
Source: Hindawi journal article supplement (doi:10.1155/2021/5544835), 2021-04-19
Supplement: f1 [file 5544835.f1.zip › 5544835.f1/XRF.txt]

Uranium tailings
sign Compound	SiO2	Al2O3	K2O	Fe2O3	SO3	Na2O	F	CaO	MgO	TiO2	P2O5	BaO   	Cr2O3	ZrO2	As2O3	MoO3	V2O5	Cs2O	ZnO	Rb2O	PbO	Cl	SrO   	La2O3	MnO	Tl2O3	PtO2	Re2O7	SeO2	Nb2O5
	m/m%	51.25	6.56	2.31	1.27	1.25	0.539	0.537	0.349	0.24	0.175	0.136	0.0433	0.0369	0.0293	0.0225	0.0153	0.0113	0.009	0.0082	0.0082	0.0081	0.0078	0.0073	0.0055	0.0053	0.0044	0.0037	0.0034	0.0023	0.002
	StdErr	0.36	0.13	0.08	0.06	0.06	0.027	0.088	0.017	0.012	0.009	0.007	0.0037	0.0018	0.0015	0.0023	0.0011	0.0013	0.002	0.0007	0.0005	0.0012	0.0015	0.0006	0.0017	0.001	0.0015	0.0012	0.0015	0.0006	0.001
	El	Si	Al	K	Fe	Sx	Na	F	Ca	Mg	Ti	Px	Ba	Cr	Zr	As	Mo	V	Cs	Zn	Rb	Pb	Cl	Sr	La	Mn	Tl	Pt	Re	Se	Nb
	m/m%	23.96	3.47	1.92	0.886	0.5	0.4	0.537	0.25	0.145	0.105	0.0595	0.0388	0.0252	0.0217	0.017	0.0102	0.0063	0.0085	0.0066	0.0075	0.0075	0.0078	0.0062	0.0047	0.0041	0.0039	0.0032	0.0026	0.0016	0.0014
	StdErr	0.17	0.07	0.06	0.039	0.022	0.02	0.088	0.012	0.007	0.005	0.003	0.0033	0.0013	0.0011	0.0018	0.0007	0.0008	0.0019	0.0006	0.0005	0.0011	0.0015	0.0005	0.0015	0.0008	0.0013	0.0011	0.0011	0.0004	0.0007
																															
Not sig Compound	I	Y2O3	CuO	Ho2O3	ThO2	HgO	Ga2O3																							
	    m/m%	0.0013	0.0012	0.00068	0.0006	0.0005	0.00031	0.00004																							
	   StdErr	0.0029	0.0009	0.00059	0.0025	0.0023	0.00086	0.00047																							
	      El	I	Y	Cu	Ho	Th	Hg	Ga																							
	    m/m%	0.0013	0.00094	0.00054	0.0006	0.0004	0.00029	0.00003																							
	  StdErr	0.0029	0.00073	0.00047	0.0022	0.002	0.0008	0.00035																							

Surface cladding
sign Compound	SiO2	Al2O3	Fe2O3	K2O	TiO2	MgO	F    	SO3	P2O5	Na2O	BaO	ZrO2	CaO	V2O5	MoO3	Cr2O3	MnO	PtO2	Rb2O	ZnO	Cs2O	La2O3	Ga2O3	PbO	Nb2O5	NiO	CuO	SrO	Y2O3	Au	Sc2O3
	m/m%	36.81	24.31	10.51	2.1	1.14	0.781	0.264	0.188	0.153	0.124	0.0479	0.0432	0.0419	0.0317	0.0275	0.0274	0.019	0.0189	0.0106	0.0088	0.0067	0.0063	0.0053	0.0052	0.0048	0.0035	0.0034	0.0032	0.003	0.0029	0.0023
	StdErr	0.3	0.25	0.16	0.07	0.05	0.039	0.087	0.009	0.008	0.008	0.0039	0.0022	0.0021	0.0017	0.0014	0.0015	0.0013	0.0011	0.0007	0.0009	0.002	0.0019	0.0005	0.0015	0.0012	0.001	0.0009	0.0008	0.0012	0.0008	0.0008
	El	Si	Al	Fe	K	Ti	Mg	F	Sx	Px	Na	Ba	Zr	Ca	V	Mo	Cr	Mn	Pt	Rb	Zn	Cs	La	Ga	Pb	Nb	Ni	Cu	Sr	Y	Au	Sc
	m/m%	17.21	12.87	7.35	1.74	0.682	0.471	0.264	0.0754	0.0669	0.0923	0.0429	0.032	0.03	0.0178	0.0183	0.0187	0.0147	0.0162	0.0097	0.0071	0.0063	0.0054	0.0039	0.0048	0.0034	0.0028	0.0027	0.0027	0.0024	0.0029	0.0015
	StdErr	0.14	0.13	0.11	0.06	0.032	0.024	0.087	0.0038	0.0033	0.0062	0.0035	0.0016	0.0015	0.001	0.001	0.001	0.001	0.0009	0.0006	0.0008	0.0019	0.0016	0.0004	0.0014	0.0008	0.0008	0.0007	0.0006	0.0009	0.0008	0.0006
																																
Not sig	Compound	ThO2	As2O3	Tb4O7	Re2O7	I	IrO2	Cl	WO3	Br	Sm2O3	GeO2	PuO2	Bi2O3	Ar																	
	     m/m%	0.005	0.0038	0.0035	0.0031	0.0025	0.0016	0.0015	0.0007	0.00066	0.0006	0.0005	0.0004	0.0003	0.0002																	
	    StdErr	0.0028	0.0029	0.0032	0.0016	0.0038	0.001	0.0013	0.0022	0.0005	0.0045	0.00049	0.0016	0.0011	0.0014																	
	      El	Th	As	Tb	Re	I	Ir	Cl	W	Br	Sm	Ge	Pu	Bi	Ar																	
	     m/m%	0.0044	0.0029	0.0032	0.0016	0.0038	0.001	0.0013	0.0022	0.0005	0.0045	0.00049	0.0016	0.0011	0.0014																	
	    StdErr	0.0024	0.0022	0.0027	0.0013	0.0038	0.0008	0.0013	0.0017	0.0005	0.0039	0.00034	0.0014	0.00098	0.0014																	
